# Supplementary material
Source: publisher figshare collection journal article supplement (https://acs.figshare.com/ndownloader/files/12124682)
Supplement: Supplementary file 1 [file 12124682]

data_exp_975
_audit_creation_date              2017-11-16
_audit_creation_method
;
Olex2 1.2
(compiled 2017.08.10 svn.r3458 for OlexSys, GUI svn.r5381)
;
_shelx_SHELXL_version_number      '2017/1'
_publ_contact_author_address      ?
_publ_contact_author_email        ?
_publ_contact_author_id_orcid     ?
_publ_contact_author_name         ''
_publ_contact_author_phone        ?
_publ_section_references
;
Dolomanov, O.V., Bourhis, L.J., Gildea, R.J, Howard, J.A.K. & Puschmann, H.
 (2009), J. Appl. Cryst. 42, 339-341.

Sheldrick, G.M. (2015). Acta Cryst. A71, 3-8.

Sheldrick, G.M. (2015). Acta Cryst. C71, 3-8.
;
_chemical_name_common             ?
_chemical_name_systematic         ?
_chemical_formula_moiety          'C22 H17 N3 O2'
_chemical_formula_sum             'C22 H17 N3 O2'
_chemical_formula_weight          355.38
_chemical_melting_point           ?
loop_
  _atom_type_symbol
  _atom_type_description
  _atom_type_scat_dispersion_real
  _atom_type_scat_dispersion_imag
  _atom_type_scat_source
 'C' 'C' 0.0033 0.0016 'International Tables Vol C Tables 4.2.6.8 and 6.1.1.4'
 'H' 'H' 0.0000 0.0000 'International Tables Vol C Tables 4.2.6.8 and 6.1.1.4'
 'N' 'N' 0.0061 0.0033 'International Tables Vol C Tables 4.2.6.8 and 6.1.1.4'
 'O' 'O' 0.0106 0.0060 'International Tables Vol C Tables 4.2.6.8 and 6.1.1.4'

_shelx_space_group_comment
;
The symmetry employed for this shelxl refinement is uniquely defined
by the following loop, which should always be used as a source of
symmetry information in preference to the above space-group names.
They are only intended as comments.
;
_space_group_crystal_system       'monoclinic'
_space_group_IT_number            14
_space_group_name_H-M_alt         'P 1 21/c 1'
_space_group_name_Hall            '-P 2ybc'
loop_
  _space_group_symop_operation_xyz
 'x, y, z'
 '-x, y+1/2, -z+1/2'
 '-x, -y, -z'
 'x, -y-1/2, z-1/2'

_cell_length_a                    6.0252(3)
_cell_length_b                    14.9032(8)
_cell_length_c                    19.2088(12)
_cell_angle_alpha                 90
_cell_angle_beta                  93.713(6)
_cell_angle_gamma                 90
_cell_volume                      1721.23(17)
_cell_formula_units_Z             4
_cell_measurement_reflns_used     4875
_cell_measurement_temperature     100.00(10)
_cell_measurement_theta_max       28.8700
_cell_measurement_theta_min       2.7210
_shelx_estimated_absorpt_T_max    0.989
_shelx_estimated_absorpt_T_min    0.984
_exptl_absorpt_coefficient_mu     0.090
_exptl_absorpt_correction_T_max   1.00000
_exptl_absorpt_correction_T_min   0.18410
_exptl_absorpt_correction_type    multi-scan
_exptl_absorpt_process_details
;
CrysAlisPro 1.171.38.43f (Rigaku Oxford Diffraction, 2015)
Empirical absorption correction using spherical harmonics,
 implemented in SCALE3 ABSPACK scaling algorithm.
;
_exptl_absorpt_special_details    ?
_exptl_crystal_colour             colourless
_exptl_crystal_colour_primary     colourless
_exptl_crystal_density_diffrn     1.371
_exptl_crystal_density_meas       ?
_exptl_crystal_density_method     ?
_exptl_crystal_description        block
_exptl_crystal_F_000              744
_exptl_crystal_size_max           0.18
_exptl_crystal_size_mid           0.15
_exptl_crystal_size_min           0.12
_exptl_transmission_factor_max    ?
_exptl_transmission_factor_min    ?
_diffrn_reflns_av_R_equivalents   0.0637
_diffrn_reflns_av_unetI/netI      0.0529
_diffrn_reflns_Laue_measured_fraction_full 0.978
_diffrn_reflns_Laue_measured_fraction_max 0.978
_diffrn_reflns_limit_h_max        5
_diffrn_reflns_limit_h_min        -7
_diffrn_reflns_limit_k_max        17
_diffrn_reflns_limit_k_min        -17
_diffrn_reflns_limit_l_max        20
_diffrn_reflns_limit_l_min        -22
_diffrn_reflns_number             9654
_diffrn_reflns_point_group_measured_fraction_full 0.978
_diffrn_reflns_point_group_measured_fraction_max 0.978
_diffrn_reflns_theta_full         24.994
_diffrn_reflns_theta_max          24.994
_diffrn_reflns_theta_min          2.125
_diffrn_ambient_environment       N~2~
_diffrn_ambient_temperature       100.00(10)
_diffrn_detector                  'CCD plate'
_diffrn_detector_area_resol_mean  5.2684
_diffrn_detector_type             AtlasS2
_diffrn_measured_fraction_theta_full 0.978
_diffrn_measured_fraction_theta_max 0.978
_diffrn_measurement_details
;
List of Runs (angles in degrees, time in seconds):

  # Type    Start    End  Width  t~exp~   \w     \q     \k     \f   Frames
--------------------------------------------------------------------------
  1  \w    -35.00  54.00   1.00    2.45    --  -11.59  57.00-120.00   89
  2  \w    -80.00  20.00   1.00    2.45    --  -11.59 -77.00 -30.00  100
  3  \w    -84.00  17.00   1.00    2.45    --  -11.59 -57.00  90.00  101
;
_diffrn_measurement_device        'four-circle diffractometer'
_diffrn_measurement_device_type   'SuperNova, Dual, Cu at zero, AtlasS2'
_diffrn_measurement_method        '\w scans'
_diffrn_orient_matrix_type
'CrysAlisPro convention (1999,Acta A55,543-557)'
_diffrn_orient_matrix_UB_11       0.0717755000
_diffrn_orient_matrix_UB_12       0.0334868000
_diffrn_orient_matrix_UB_13       -0.0120604000
_diffrn_orient_matrix_UB_21       0.0129621000
_diffrn_orient_matrix_UB_22       0.0182344000
_diffrn_orient_matrix_UB_23       0.0341632000
_diffrn_orient_matrix_UB_31       0.0927409000
_diffrn_orient_matrix_UB_32       -0.0284290000
_diffrn_orient_matrix_UB_33       0.0076334000
_diffrn_radiation_monochromator   mirror
_diffrn_radiation_probe           x-ray
_diffrn_radiation_type            MoK\a
_diffrn_radiation_wavelength      0.71073
_diffrn_source                    'micro-focus sealed X-ray tube'
_diffrn_source_type               'SuperNova (Mo) X-ray Source'
_reflns_Friedel_coverage          0.000
_reflns_Friedel_fraction_full     .
_reflns_Friedel_fraction_max      .
_reflns_number_gt                 2504
_reflns_number_total              2960
_reflns_odcompleteness_completeness 96.79
_reflns_odcompleteness_iscentric  1
_reflns_odcompleteness_theta      26.32
_reflns_special_details
;
 Reflections were merged by SHELXL according to the crystal
 class for the calculation of statistics and refinement.
 
 _reflns_Friedel_fraction is defined as the number of unique
 Friedel pairs measured divided by the number that would be
 possible theoretically, ignoring centric projections and
 systematic absences.
;
_reflns_threshold_expression      'I > 2\s(I)'
_computing_cell_refinement        'CrysAlisPro 1.171.38.43f (Rigaku OD, 2015)'
_computing_data_collection        'CrysAlisPro 1.171.38.43f (Rigaku OD, 2015)'
_computing_data_reduction         'CrysAlisPro 1.171.38.43f (Rigaku OD, 2015)'
_computing_molecular_graphics     'Olex2 (Dolomanov et al., 2009)'
_computing_publication_material   'Olex2 (Dolomanov et al., 2009)'
_computing_structure_refinement   'ShelXL (Sheldrick, 2015)'
_computing_structure_solution     'ShelXT (Sheldrick, 2015)'
_refine_diff_density_max          0.219
_refine_diff_density_min          -0.257
_refine_diff_density_rms          0.060
_refine_ls_extinction_coef        .
_refine_ls_extinction_method      none
_refine_ls_goodness_of_fit_ref    1.042
_refine_ls_hydrogen_treatment     constr
_refine_ls_matrix_type            full
_refine_ls_number_parameters      245
_refine_ls_number_reflns          2960
_refine_ls_number_restraints      0
_refine_ls_R_factor_all           0.0543
_refine_ls_R_factor_gt            0.0446
_refine_ls_restrained_S_all       1.042
_refine_ls_shift/su_max           0.000
_refine_ls_shift/su_mean          0.000
_refine_ls_structure_factor_coef  Fsqd
_refine_ls_weighting_details
'w=1/[\s^2^(Fo^2^)+(0.0639P)^2^+0.2658P] where P=(Fo^2^+2Fc^2^)/3'
_refine_ls_weighting_scheme       calc
_refine_ls_wR_factor_gt           0.1143
_refine_ls_wR_factor_ref          0.1252
_refine_special_details           ?
_olex2_refinement_description
;
1. Fixed Uiso
 At 1.2 times of:
  All C(H) groups
 At 1.5 times of:
  All C(H,H,H) groups
2.a Aromatic/amide H refined with riding coordinates:
 C7(H7), C2(H2), C16(H16), C19(H19), C5(H5), C4(H4), C22(H22), C3(H3),
 C15(H15), C12(H12), C14(H14), C13(H13), C20(H20), C21(H21)
2.b Idealised Me refined as rotating group:
 C17(H17A,H17B,H17C)
;
_atom_sites_solution_hydrogens    geom
_atom_sites_solution_primary      dual
_atom_sites_solution_secondary    ?
loop_
  _atom_site_label
  _atom_site_type_symbol
  _atom_site_fract_x
  _atom_site_fract_y
  _atom_site_fract_z
  _atom_site_U_iso_or_equiv
  _atom_site_adp_type
  _atom_site_occupancy
  _atom_site_site_symmetry_order
  _atom_site_calc_flag
  _atom_site_refinement_flags_posn
  _atom_site_refinement_flags_adp
  _atom_site_refinement_flags_occupancy
  _atom_site_disorder_assembly
  _atom_site_disorder_group
 O1 O 0.57793(18) 0.16245(7) 0.24758(7) 0.0290(3) Uani 1 1 d . . . . .
 O2 O 1.18798(18) 0.36602(8) 0.34149(7) 0.0326(3) Uani 1 1 d . . . . .
 N1 N 0.7708(2) 0.28105(9) 0.29529(8) 0.0232(3) Uani 1 1 d . . . . .
 N3 N 0.8649(2) 0.12312(9) 0.43283(8) 0.0246(3) Uani 1 1 d . . . . .
 N2 N 0.8882(2) 0.22332(9) 0.34234(8) 0.0237(3) Uani 1 1 d . . . . .
 C18 C 0.7702(2) 0.19141(10) 0.39728(9) 0.0208(4) Uani 1 1 d . . . . .
 C9 C 0.6050(3) 0.24361(11) 0.25026(9) 0.0224(4) Uani 1 1 d . . . . .
 C6 C 0.4916(3) 0.40105(11) 0.22056(9) 0.0225(4) Uani 1 1 d . . . . .
 C7 C 0.6706(3) 0.43155(11) 0.26703(9) 0.0229(4) Uani 1 1 d . . . . .
 H7 H 0.693853 0.492875 0.272731 0.028 Uiso 1 1 calc R . . . .
 C1 C 0.4625(3) 0.30829(11) 0.21063(9) 0.0224(4) Uani 1 1 d . . . . .
 C8 C 0.8066(2) 0.37361(10) 0.30278(9) 0.0220(4) Uani 1 1 d . . . . .
 C2 C 0.2843(3) 0.27621(11) 0.16766(9) 0.0258(4) Uani 1 1 d . . . . .
 H2 H 0.267888 0.214906 0.159870 0.031 Uiso 1 1 calc R . . . .
 C16 C 0.8194(3) 0.51493(11) 0.41860(9) 0.0260(4) Uani 1 1 d . . . . .
 H16 H 0.693841 0.478495 0.416152 0.031 Uiso 1 1 calc R . . . .
 C11 C 0.9998(3) 0.49346(11) 0.38004(9) 0.0235(4) Uani 1 1 d . . . . .
 C10 C 1.0127(3) 0.40658(11) 0.34231(9) 0.0244(4) Uani 1 1 d . . . . .
 C19 C 0.5716(3) 0.23155(11) 0.41580(10) 0.0257(4) Uani 1 1 d . . . . .
 H19 H 0.510148 0.279802 0.390627 0.031 Uiso 1 1 calc R . . . .
 C5 C 0.3387(3) 0.46032(11) 0.18702(9) 0.0252(4) Uani 1 1 d . . . . .
 H5 H 0.358448 0.521939 0.191921 0.030 Uiso 1 1 calc R . . . .
 C4 C 0.1598(3) 0.42742(11) 0.14692(10) 0.0286(4) Uani 1 1 d . . . . .
 H4 H 0.055777 0.466960 0.126322 0.034 Uiso 1 1 calc R . . . .
 C22 C 0.7615(3) 0.09258(12) 0.48772(10) 0.0305(4) Uani 1 1 d . . . . .
 H22 H 0.826349 0.044843 0.512691 0.037 Uiso 1 1 calc R . . . .
 C3 C 0.1329(3) 0.33556(11) 0.13686(10) 0.0295(4) Uani 1 1 d . . . . .
 H3 H 0.012054 0.314124 0.109177 0.035 Uiso 1 1 calc R . . . .
 C15 C 0.8267(3) 0.59038(12) 0.46052(10) 0.0307(4) Uani 1 1 d . . . . .
 H15 H 0.708057 0.603779 0.487378 0.037 Uiso 1 1 calc R . . . .
 C12 C 1.1838(3) 0.55060(12) 0.38207(10) 0.0288(4) Uani 1 1 d . . . . .
 H12 H 1.304368 0.536908 0.356100 0.035 Uiso 1 1 calc R . . . .
 C17 C 1.0565(3) 0.16787(11) 0.31135(10) 0.0290(4) Uani 1 1 d . . . . .
 H17A H 0.984579 0.121493 0.283505 0.044 Uiso 1 1 calc GR . . . .
 H17B H 1.151370 0.141186 0.347733 0.044 Uiso 1 1 calc GR . . . .
 H17C H 1.143895 0.204583 0.282499 0.044 Uiso 1 1 calc GR . . . .
 C14 C 1.0113(3) 0.64601(12) 0.46245(11) 0.0350(5) Uani 1 1 d . . . . .
 H14 H 1.016768 0.696518 0.490948 0.042 Uiso 1 1 calc R . . . .
 C13 C 1.1876(3) 0.62673(11) 0.42214(11) 0.0337(5) Uani 1 1 d . . . . .
 H13 H 1.308682 0.665467 0.422252 0.040 Uiso 1 1 calc R . . . .
 C20 C 0.4711(3) 0.19746(12) 0.47214(11) 0.0329(5) Uani 1 1 d . . . . .
 H20 H 0.338008 0.222007 0.485156 0.040 Uiso 1 1 calc R . . . .
 C21 C 0.5672(3) 0.12660(12) 0.50966(10) 0.0344(5) Uani 1 1 d . . . . .
 H21 H 0.502175 0.103051 0.548287 0.041 Uiso 1 1 calc R . . . .

loop_
  _atom_site_aniso_label
  _atom_site_aniso_U_11
  _atom_site_aniso_U_22
  _atom_site_aniso_U_33
  _atom_site_aniso_U_23
  _atom_site_aniso_U_13
  _atom_site_aniso_U_12
 O1 0.0345(6) 0.0202(7) 0.0319(8) 0.0000(5) -0.0009(6) 0.0007(5)
 O2 0.0253(6) 0.0324(7) 0.0401(9) -0.0018(6) 0.0009(6) 0.0040(5)
 N1 0.0252(7) 0.0226(7) 0.0216(9) 0.0032(6) -0.0002(6) 0.0022(5)
 N3 0.0276(7) 0.0253(8) 0.0203(8) 0.0014(6) -0.0029(6) 0.0012(5)
 N2 0.0238(7) 0.0229(7) 0.0243(9) 0.0061(6) 0.0016(6) 0.0048(5)
 C18 0.0225(8) 0.0199(8) 0.0195(10) -0.0037(7) -0.0034(7) -0.0024(6)
 C9 0.0263(8) 0.0224(9) 0.0190(9) 0.0003(7) 0.0060(7) 0.0002(6)
 C6 0.0263(8) 0.0244(9) 0.0170(9) -0.0003(7) 0.0039(7) -0.0014(6)
 C7 0.0279(9) 0.0220(8) 0.0190(10) -0.0005(7) 0.0025(7) -0.0014(6)
 C1 0.0273(8) 0.0239(9) 0.0163(9) -0.0007(7) 0.0040(7) 0.0004(6)
 C8 0.0246(8) 0.0217(8) 0.0200(10) 0.0002(7) 0.0043(7) -0.0003(6)
 C2 0.0358(9) 0.0217(9) 0.0197(10) -0.0012(7) 0.0006(8) -0.0030(7)
 C16 0.0259(8) 0.0288(9) 0.0226(10) 0.0029(8) -0.0042(8) 0.0026(7)
 C11 0.0269(9) 0.0253(9) 0.0173(9) 0.0038(7) -0.0061(7) 0.0010(6)
 C10 0.0278(9) 0.0258(9) 0.0193(10) 0.0046(7) -0.0009(8) 0.0011(7)
 C19 0.0252(8) 0.0250(9) 0.0265(10) -0.0020(8) -0.0008(8) 0.0033(6)
 C5 0.0343(9) 0.0209(8) 0.0198(10) 0.0000(7) -0.0016(8) 0.0008(6)
 C4 0.0327(9) 0.0280(9) 0.0244(11) 0.0001(8) -0.0037(8) 0.0030(7)
 C22 0.0397(10) 0.0307(10) 0.0206(10) 0.0046(8) -0.0021(9) 0.0009(7)
 C3 0.0336(9) 0.0313(10) 0.0227(11) -0.0003(8) -0.0050(8) -0.0032(7)
 C15 0.0346(10) 0.0349(10) 0.0218(11) 0.0005(8) -0.0043(8) 0.0116(7)
 C12 0.0279(9) 0.0308(10) 0.0268(11) 0.0031(8) -0.0046(8) -0.0006(7)
 C17 0.0260(9) 0.0278(9) 0.0340(11) 0.0030(8) 0.0066(8) 0.0043(7)
 C14 0.0447(11) 0.0277(10) 0.0303(12) -0.0036(8) -0.0141(9) 0.0062(8)
 C13 0.0355(10) 0.0280(10) 0.0357(12) 0.0021(9) -0.0113(9) -0.0044(7)
 C20 0.0304(9) 0.0362(10) 0.0331(12) -0.0060(9) 0.0094(9) 0.0030(7)
 C21 0.0424(11) 0.0371(11) 0.0247(11) -0.0003(9) 0.0103(9) -0.0017(8)

_geom_special_details
;
 All esds (except the esd in the dihedral angle between two l.s. planes)
 are estimated using the full covariance matrix.  The cell esds are taken
 into account individually in the estimation of esds in distances, angles
 and torsion angles; correlations between esds in cell parameters are only
 used when they are defined by crystal symmetry.  An approximate (isotropic)
 treatment of cell esds is used for estimating esds involving l.s. planes.
;
loop_
  _geom_bond_atom_site_label_1
  _geom_bond_atom_site_label_2
  _geom_bond_distance
  _geom_bond_site_symmetry_2
  _geom_bond_publ_flag
 O1 C9 1.2212(19) . ?
 O2 C10 1.2181(19) . ?
 N1 N2 1.4053(18) . ?
 N1 C9 1.395(2) . ?
 N1 C8 1.402(2) . ?
 N3 C18 1.333(2) . ?
 N3 C22 1.339(2) . ?
 N2 C18 1.394(2) . ?
 N2 C17 1.464(2) . ?
 C18 C19 1.404(2) . ?
 C9 C1 1.470(2) . ?
 C6 C7 1.429(2) . ?
 C6 C1 1.405(2) . ?
 C6 C5 1.403(2) . ?
 C7 H7 0.9300 . ?
 C7 C8 1.347(2) . ?
 C1 C2 1.396(2) . ?
 C8 C10 1.496(2) . ?
 C2 H2 0.9300 . ?
 C2 C3 1.376(2) . ?
 C16 H16 0.9300 . ?
 C16 C11 1.391(2) . ?
 C16 C15 1.382(2) . ?
 C11 C10 1.488(2) . ?
 C11 C12 1.397(2) . ?
 C19 H19 0.9300 . ?
 C19 C20 1.372(3) . ?
 C5 H5 0.9300 . ?
 C5 C4 1.374(2) . ?
 C4 H4 0.9300 . ?
 C4 C3 1.391(2) . ?
 C22 H22 0.9300 . ?
 C22 C21 1.367(3) . ?
 C3 H3 0.9300 . ?
 C15 H15 0.9300 . ?
 C15 C14 1.386(3) . ?
 C12 H12 0.9300 . ?
 C12 C13 1.370(3) . ?
 C17 H17A 0.9600 . ?
 C17 H17B 0.9600 . ?
 C17 H17C 0.9600 . ?
 C14 H14 0.9300 . ?
 C14 C13 1.385(3) . ?
 C13 H13 0.9300 . ?
 C20 H20 0.9300 . ?
 C20 C21 1.384(3) . ?
 C21 H21 0.9300 . ?

loop_
  _geom_angle_atom_site_label_1
  _geom_angle_atom_site_label_2
  _geom_angle_atom_site_label_3
  _geom_angle
  _geom_angle_site_symmetry_1
  _geom_angle_site_symmetry_3
  _geom_angle_publ_flag
 C9 N1 N2 117.67(12) . . ?
 C9 N1 C8 123.81(13) . . ?
 C8 N1 N2 117.94(13) . . ?
 C18 N3 C22 117.20(14) . . ?
 N1 N2 C17 114.66(14) . . ?
 C18 N2 N1 115.82(12) . . ?
 C18 N2 C17 121.06(13) . . ?
 N3 C18 N2 115.20(13) . . ?
 N3 C18 C19 122.63(16) . . ?
 N2 C18 C19 122.09(15) . . ?
 O1 C9 N1 120.71(15) . . ?
 O1 C9 C1 123.76(15) . . ?
 N1 C9 C1 115.44(14) . . ?
 C1 C6 C7 118.70(15) . . ?
 C1 C6 C5 119.00(15) . . ?
 C5 C6 C7 122.23(15) . . ?
 C6 C7 H7 119.2 . . ?
 C8 C7 C6 121.60(15) . . ?
 C8 C7 H7 119.2 . . ?
 C6 C1 C9 120.76(15) . . ?
 C2 C1 C9 118.86(15) . . ?
 C2 C1 C6 120.12(15) . . ?
 N1 C8 C10 119.50(14) . . ?
 C7 C8 N1 119.59(15) . . ?
 C7 C8 C10 120.37(14) . . ?
 C1 C2 H2 120.1 . . ?
 C3 C2 C1 119.81(15) . . ?
 C3 C2 H2 120.1 . . ?
 C11 C16 H16 120.0 . . ?
 C15 C16 H16 120.0 . . ?
 C15 C16 C11 120.05(16) . . ?
 C16 C11 C10 121.77(14) . . ?
 C16 C11 C12 119.41(16) . . ?
 C12 C11 C10 118.52(15) . . ?
 O2 C10 C8 121.49(15) . . ?
 O2 C10 C11 120.71(14) . . ?
 C11 C10 C8 117.72(14) . . ?
 C18 C19 H19 121.0 . . ?
 C20 C19 C18 117.99(16) . . ?
 C20 C19 H19 121.0 . . ?
 C6 C5 H5 120.0 . . ?
 C4 C5 C6 120.06(15) . . ?
 C4 C5 H5 120.0 . . ?
 C5 C4 H4 119.7 . . ?
 C5 C4 C3 120.63(16) . . ?
 C3 C4 H4 119.7 . . ?
 N3 C22 H22 117.7 . . ?
 N3 C22 C21 124.64(17) . . ?
 C21 C22 H22 117.7 . . ?
 C2 C3 C4 120.31(16) . . ?
 C2 C3 H3 119.8 . . ?
 C4 C3 H3 119.8 . . ?
 C16 C15 H15 120.1 . . ?
 C16 C15 C14 119.84(17) . . ?
 C14 C15 H15 120.1 . . ?
 C11 C12 H12 119.8 . . ?
 C13 C12 C11 120.32(17) . . ?
 C13 C12 H12 119.8 . . ?
 N2 C17 H17A 109.5 . . ?
 N2 C17 H17B 109.5 . . ?
 N2 C17 H17C 109.5 . . ?
 H17A C17 H17B 109.5 . . ?
 H17A C17 H17C 109.5 . . ?
 H17B C17 H17C 109.5 . . ?
 C15 C14 H14 119.9 . . ?
 C13 C14 C15 120.29(17) . . ?
 C13 C14 H14 119.9 . . ?
 C12 C13 C14 120.02(16) . . ?
 C12 C13 H13 120.0 . . ?
 C14 C13 H13 120.0 . . ?
 C19 C20 H20 119.9 . . ?
 C19 C20 C21 120.13(16) . . ?
 C21 C20 H20 119.9 . . ?
 C22 C21 C20 117.40(17) . . ?
 C22 C21 H21 121.3 . . ?
 C20 C21 H21 121.3 . . ?

loop_
  _refln_index_h
  _refln_index_k
  _refln_index_l
  _refln_F_squared_meas
  _refln_F_squared_sigma
 0 0 2 1714.58 54.42
 0 0 -2 2713.33 60.12
 0 0 3 -0.01 0.62
 0 0 -3 32.81 4.23
 0 0 4 6.54 1.48
 0 0 -4 11.94 3.02
 0 0 -5 29.41 5.55
 0 0 5 0.39 0.62
 0 0 -6 249.72 19.34
 0 0 -6 257.88 13.46
 0 0 6 234.91 12.28
 0 0 -7 7.98 4.49
 0 0 -7 9.87 2.88
 0 0 7 7.01 2.14
 0 0 -8 23.16 7.51
 0 0 8 32.74 4.58
 0 0 -9 -0.51 0.95
 0 0 -9 -0.24 1.35
 0 0 9 0.08 0.24
 0 0 10 47.59 5.98
 0 0 -10 21.12 8.85
 0 0 11 0.32 1.1
 0 0 -12 314.2 20.94
 0 0 12 261.85 16.89
 0 0 -13 -0.16 0.77
 0 0 13 -0.81 0.87
 0 0 -14 14.68 4.7
 0 0 14 10.26 3.28
 0 0 -15 1.51 0.89
 0 0 -16 23.56 6.28
 0 0 -17 1.1 1.99
 0 0 -18 86.3 13.29
 0 0 -19 3.57 2.67
 0 0 -20 14.88 5.99
 0 0 -21 0.73 1.23
 0 0 -22 157.38 20.23
 0 0 -23 0.95 3.57
 0 0 -24 56.73 12.71
 0 -1 2 985.68 31.91
 0 1 2 979.07 32.13
 0 1 3 155.68 7.99
 0 -1 3 165.64 7.87
 0 -1 4 297.69 12.92
 0 1 4 306.08 13.38
 0 -1 -4 348.93 18.76
 0 1 -4 375.42 18.55
 0 -1 -5 1817.15 63.06
 0 1 5 1636.06 51.18
 0 1 -5 1828.43 60.67
 0 -1 5 1557.99 50.58
 0 -1 6 39.7 4.43
 0 1 -6 58.39 5.61
 0 1 -6 56.17 8.31
 0 -1 -6 42.78 8.28
 0 1 6 38.59 4.47
 0 -1 -6 47.06 5.31
 0 1 -7 92.41 12.38
 0 1 7 86.36 7.35
 0 -1 -7 85.52 13.47
 0 1 -7 95.1 8.12
 0 -1 7 82.26 7.1
 0 -1 -7 99.81 8.48
 0 1 8 39.25 5.11
 0 -1 -8 38.24 5.49
 0 -1 -8 27.45 8.76
 0 1 -8 33.89 5.1
 0 -1 8 30.2 4.31
 0 1 -8 32.27 9.01
 0 -1 -9 5.19 4.65
 0 1 -9 22.42 4.37
 0 1 9 20.76 3.95
 0 1 -9 18.69 8.64
 0 -1 -9 27.23 4.95
 0 -1 9 22 3.91
 0 -1 10 366.44 18.78
 0 1 10 356.65 19.05
 0 1 11 123.28 10.73
 0 -1 11 135.55 11.05
 0 -1 12 82.45 8.95
 0 1 12 86.77 9.12
 0 1 -12 105.97 11.3
 0 -1 -12 105.94 11.49
 0 1 13 17.87 4.03
 0 -1 -13 24.08 5.81
 0 -1 13 21.27 4.69
 0 1 -13 22.95 5.47
 0 -1 14 38.63 6.58
 0 1 -14 52.76 8.75
 0 1 14 42.89 6.74
 0 -1 -14 53.12 8.76
 0 -1 -15 203.16 18.61
 0 1 -15 215.31 19.47
 0 -1 -16 16.16 5.15
 0 1 -16 24.5 6.49
 0 -1 -17 0.23 1.72
 0 1 -17 1.54 2.23
 0 1 -18 15.93 5.79
 0 -1 -18 16.45 5.45
 0 1 -19 7.48 4.88
 0 -1 -19 9.6 4.35
 0 1 -20 18.19 6.48
 0 -1 -20 18.24 6.56
 0 -1 -21 17.82 6.58
 0 1 -21 24.93 7.75
 0 1 -22 128.41 18.44
 0 -1 -22 108.87 16.87
 0 -1 -23 4.67 4.62
 0 1 -23 11.42 6.49
 0 -1 -24 102.25 17.04
 0 1 -24 99.21 16.86
 0 2 0 1402.13 39.58
 0 2 -1 888.17 26.07
 0 2 1 861.58 25.98
 0 2 2 820.46 26.89
 0 2 2 852.91 26.87
 0 2 -2 873.68 26.88
 0 2 3 3568.45 102.78
 0 2 -3 3538.52 102.38
 0 -2 3 3742.58 102.77
 0 -2 -4 400.41 24.42
 0 2 4 440.79 17.83
 0 -2 5 5685.11 153.53
 0 -2 -5 4117.74 165.89
 0 2 5 5123.7 153.28
 0 2 -5 6803.09 167.36
 0 -2 -5 5704.33 154.6
 0 -2 -6 15.83 3.04
 0 2 6 12.92 2.64
 0 2 -6 15.12 2.86
 0 -2 -6 9.09 4.39
 0 2 -7 112.21 14.76
 0 -2 -7 134.95 9.84
 0 -2 7 141.89 9.5
 0 2 7 132.06 9.76
 0 2 -7 133.59 9.58
 0 -2 -8 86.07 8.16
 0 -2 8 88.02 7.72
 0 2 -8 85.79 7.99
 0 2 8 78.41 7.59
 0 2 -8 56.67 12.07
 0 2 9 -0.31 0.61
 0 2 -9 2.26 4.44
 0 -2 9 -0.63 0.61
 0 -2 -9 3.41 1.49
 0 2 10 21.74 4.3
 0 -2 10 28.42 4.66
 0 2 -11 8.25 2.77
 0 -2 11 8.42 2.61
 0 2 11 12.41 3.16
 0 2 12 130.99 11.8
 0 -2 12 144.98 12.26
 0 2 -12 156.98 13.9
 0 -2 -12 157.23 13.97
 0 2 13 326.73 20.58
 0 -2 13 357.92 21.06
 0 -2 -13 377.06 24.01
 0 2 -13 385.9 23.94
 0 2 14 27.82 5.45
 0 2 -14 41.53 7.64
 0 -2 -14 28.22 6.3
 0 2 -15 320.08 23.5
 0 -2 -15 317.95 23.51
 0 -2 -16 90.34 12.49
 0 2 -16 86.5 12.19
 0 2 -17 95.53 13.77
 0 -2 -17 100.14 13.39
 0 2 -18 33.75 8.31
 0 -2 -18 21.11 6.33
 0 2 -19 5.71 3.76
 0 -2 -19 5.15 3.27
 0 2 -20 119.4 16.75
 0 -2 -20 121.85 16.75
 0 -2 -21 26.92 8.35
 0 2 -21 22.56 7.57
 0 -2 -22 77.38 13.92
 0 2 -22 84.28 14.62
 0 2 -23 45.85 10.99
 0 -2 -23 37.68 10.3
 0 2 -24 39.76 10.78
 0 -2 -24 47.74 11.64
 0 3 0 0.13 0.21
 0 3 1 1994.23 58.26
 0 3 -1 2099.04 58.31
 0 3 2 1129.91 37.41
 0 3 -2 1189.23 37.44
 0 3 3 98.57 6.42
 0 3 -3 120.93 9.42
 0 3 -3 106.58 6.53
 0 3 4 823.57 29.14
 0 3 -4 827.68 28.73
 0 3 5 656.34 24.92
 0 3 -5 702.83 24.86
 0 3 -5 702.54 33.45
 0 -3 5 700.22 24.85
 0 3 -6 20.57 5.65
 0 -3 -6 33.62 4.7
 0 -3 6 24.83 3.77
 0 -3 -6 11.37 5.27
 0 3 6 20.06 3.45
 0 3 -7 7.45 3.8
 0 -3 7 8.18 2.18
 0 3 7 6.37 2.04
 0 3 -7 7.33 2.27
 0 -3 -7 7.38 2.11
 0 3 8 50.33 6.18
 0 -3 -8 60.52 6.95
 0 -3 8 61.17 6.52
 0 3 -8 55.88 6.43
 0 3 9 674.26 28.22
 0 -3 9 676.06 27.44
 0 3 10 214.44 14.66
 0 -3 10 235.95 14.68
 0 3 11 -0.74 1.04
 0 3 -11 -0.92 1.11
 0 3 12 78.52 9.05
 0 -3 -12 91.61 10.81
 0 3 -12 81.99 9.83
 0 -3 12 78.09 8.91
 0 -3 -13 35.55 6.87
 0 -3 13 24.19 5
 0 3 13 27.48 5.43
 0 3 -13 32.25 6.39
 0 3 -14 18.22 5.02
 0 -3 -14 23.54 5.68
 0 -3 -15 11.3 3.8
 0 3 -15 11.36 4.26
 0 3 -16 37.14 7.88
 0 -3 -16 33.43 7.9
 0 -3 -17 42.94 8.85
 0 3 -17 29.18 7.36
 0 3 -18 80.97 12.65
 0 -3 -18 93.22 13.64
 0 3 -19 4.21 3.13
 0 -3 -19 0.49 1.4
 0 -3 -20 91.41 14.56
 0 3 -20 87.88 14.49
 0 3 -21 68.77 13.43
 0 -3 -21 75.73 13.59
 0 3 -22 27.21 8.18
 0 -3 -22 35.92 9.41
 0 3 -23 14.46 6.97
 0 -3 -23 8.63 5.03
 0 -3 -24 1.56 1.74
 0 3 -24 10.44 5.75
 0 4 0 1281.94 38.63
 0 4 -1 1468.55 42.65
 0 4 1 1368.23 42.44
 0 4 -2 516.12 24.57
 0 4 -2 563 19.68
 0 4 2 546.69 19.74
 0 4 3 203.77 10.43
 0 4 -3 208.35 10.3
 0 4 -3 206 14.81
 0 4 4 1177.56 38.37
 0 4 -4 1116.14 37.28
 0 4 -4 1053.48 46.05
 0 4 5 197.63 11.59
 0 4 -5 173.68 16.63
 0 4 -5 208.13 11.48
 0 -4 6 321.12 15.93
 0 4 6 294 15.54
 0 4 -6 322.56 15.57
 0 4 -7 21.19 3.63
 0 -4 7 21.24 3.73
 0 4 7 24.25 4.02
 0 -4 -7 30.25 4.6
 0 4 -7 17.41 6.64
 0 4 -7 23.45 3.95
 0 -4 8 48.21 5.99
 0 4 8 42.93 5.77
 0 4 9 134.9 11.1
 0 -4 9 152.57 11.51
 0 4 10 214.13 15.12
 0 -4 10 239.73 15.63
 0 4 -10 215.36 15.03
 0 -4 -11 437.51 24.56
 0 4 11 375.58 22.26
 0 -4 11 397.17 21.98
 0 4 -11 405.92 22.6
 0 4 -12 -0.33 0.72
 0 -4 12 0.99 0.97
 0 -4 -12 -0.1 1.62
 0 4 12 0.67 0.8
 0 -4 13 409.27 23.67
 0 4 -13 422.1 25.2
 0 -4 -13 470.02 27.15
 0 -4 -14 152.43 15.4
 0 4 -14 134.28 13.84
 0 -4 -15 12.4 4.34
 0 4 -15 10.8 3.76
 0 4 -16 1.58 0.43
 0 -4 -16 0.93 0.76
 0 4 -17 3.12 3.16
 0 -4 -17 1.01 0.87
 0 -4 -18 0.93 1.25
 0 4 -18 2.59 2.99
 0 -4 -19 47.86 10.2
 0 4 -19 46.99 10
 0 4 -20 12.73 5.42
 0 -4 -20 16.91 6.12
 0 4 -21 0.08 2.99
 0 -4 -21 -2.65 3.59
 0 -4 -22 8.72 4.73
 0 4 -22 4.26 2.15
 0 4 -23 43.31 10.84
 0 -4 -23 46.74 11.55
 0 -4 -24 44.92 11.35
 0 5 0 0.34 0.36
 0 5 -1 259.4 11.54
 0 5 1 248.78 11.51
 0 5 2 310.04 13.85
 0 5 -2 325.96 13.83
 0 5 -3 1020.16 30.47
 0 5 3 959.97 30.43
 0 5 4 676.18 25.06
 0 5 -4 713.41 24.8
 0 5 -5 145.99 9.52
 0 5 5 163.59 11.23
 0 5 6 53.88 6.06
 0 5 -6 61.47 6.3
 0 5 -7 47.45 5.69
 0 5 7 35.6 5.17
 0 5 -8 133.4 10.43
 0 5 8 119.23 10.15
 0 5 9 521.99 25.5
 0 5 -9 483.05 24.63
 0 5 -9 555.98 25.58
 0 5 -10 415.78 21.95
 0 5 -10 422.88 22.57
 0 5 10 361.32 21.49
 0 -5 -10 467.24 24.38
 0 -5 10 419.72 22.34
 0 -5 -11 5.08 2.34
 0 5 11 8.52 2.78
 0 5 -11 7.69 2.67
 0 5 -11 9.78 2.9
 0 -5 11 9.52 2.96
 0 5 12 71.95 9.26
 0 5 -12 86.58 9.98
 0 -5 12 90.05 10.02
 0 5 -13 47.95 7.76
 0 -5 -13 80.94 12.02
 0 5 -14 118.47 13.03
 0 -5 -14 176.76 17.64
 0 -5 -15 558.85 34.53
 0 5 -15 413.91 27.7
 0 -5 -16 26.78 7.41
 0 5 -16 25.75 6.37
 0 5 -17 73.54 11.57
 0 -5 -17 89.23 13.44
 0 5 -18 0.79 2.15
 0 -5 -18 2.66 2.68
 0 -5 -19 6.64 4.37
 0 5 -19 5.18 3.52
 0 -5 -20 14.69 6.14
 0 5 -20 6.09 3.26
 0 -5 -21 5.34 4.18
 0 5 -21 11.67 4.74
 0 5 -22 4.58 2.31
 0 -5 -22 10.12 5.82
 0 5 -23 5.26 3.79
 0 -5 -23 7.36 3.2
 0 6 0 19.27 2.9
 0 6 -1 -0.07 0.36
 0 6 1 0.22 0.58
 0 6 2 2.73 1.18
 0 6 -2 2.18 1.07
 0 6 -3 137.4 8.8
 0 6 3 128.88 8.82
 0 6 -4 197.57 11.26
 0 6 4 173.82 11.11
 0 6 5 640.68 26.77
 0 6 -5 675.8 26.42
 0 6 6 257.04 16.85
 0 6 -6 230.04 13.83
 0 6 -7 24.87 4.37
 0 6 7 23.07 4.26
 0 6 -8 -0.11 0.56
 0 -6 -8 -0.05 0.29
 0 6 8 0.47 0.51
 0 6 -8 -0.48 0.59
 0 6 -9 213.08 14.66
 0 6 9 177.01 13.75
 0 -6 -9 221.24 15.21
 0 6 -9 204.35 14.37
 0 6 -10 125.47 11.43
 0 6 10 119.15 11.25
 0 -6 -10 142.18 12.41
 0 6 -10 128.34 11.43
 0 -6 -11 1.74 1.36
 0 6 -11 -0.1 1.52
 0 6 11 1.75 0.48
 0 6 -11 1.36 1.21
 0 6 -12 85.51 10.13
 0 -6 -12 96.92 11.51
 0 -6 -12 84.88 10.3
 0 6 -13 161.61 14.89
 0 -6 -13 197.58 16.86
 0 6 -14 55.98 8.77
 0 -6 -14 67.96 10.17
 0 6 -15 57.55 9.39
 0 -6 -15 56.85 9.81
 0 -6 -16 158.51 17.45
 0 6 -16 127.62 14.89
 0 -6 -17 45.88 9.44
 0 6 -17 35.64 7.98
 0 6 -18 70.12 11.7
 0 -6 -18 84.15 13.38
 0 -6 -19 1.16 2.29
 0 6 -19 2.16 2.4
 0 -6 -20 0.94 1.36
 0 6 -20 2.23 3.36
 0 -6 -21 18.5 6.63
 0 6 -21 19.55 6.65
 0 6 -22 0.17 2.43
 0 -6 -22 -0.97 2.73
 0 -6 -23 0.22 2.23
 0 6 -23 -2.32 3.03
 0 7 0 1.66 0.93
 0 7 1 954.37 34.22
 0 7 -1 1024.96 34.36
 0 7 -2 705.52 26.07
 0 7 2 653.18 26.12
 0 7 -3 323.66 16.61
 0 7 3 338.63 17.24
 0 7 4 164.12 11.19
 0 7 -4 176.55 11.12
 0 7 -5 38.73 4.99
 0 7 5 38.5 5.23
 0 7 6 49.11 6.45
 0 7 -6 53.99 6.25
 0 -7 -7 45.6 5.91
 0 7 -7 53.4 6.61
 0 7 7 55.79 7.24
 0 -7 -8 2.84 1.34
 0 7 8 2.33 1.34
 0 7 -8 0.58 0.84
 0 7 -8 3.78 1.81
 0 7 -9 123.98 11.31
 0 7 -9 137.51 11.67
 0 -7 -9 143.57 11.88
 0 7 9 121 11.56
 0 7 -10 75.76 8.94
 0 7 10 72.98 8.98
 0 -7 -10 73.96 9.03
 0 7 -10 88.63 9.62
 0 -7 -11 52.72 7.91
 0 7 -11 45.67 7.14
 0 -7 -12 58.62 8.82
 0 7 -12 57.11 8.46
 0 -7 -13 53.01 8.38
 0 7 -13 54.86 8.37
 0 7 -14 10.95 3.7
 0 -7 -14 12.33 3.69
 0 7 -15 111.13 13.03
 0 -7 -15 108.79 13.72
 0 7 -16 119.24 14.31
 0 -7 -16 137.9 15.85
 0 7 -17 96.99 13.21
 0 -7 -17 115.95 14.97
 0 -7 -18 3.31 3.83
 0 7 -18 1.58 2.76
 0 -7 -18 4.09 3.05
 0 -7 -19 2.65 1.76
 0 -7 -19 0.49 1.81
 0 7 -19 1.15 1.61
 0 -7 -20 5.23 3.52
 0 -7 -20 8.59 4.19
 0 7 -20 7.71 4.47
 0 7 -21 29.11 8.11
 0 -7 -21 25.48 7.6
 0 -7 -21 39.19 10.02
 0 -7 -22 2.52 1.93
 0 -7 -22 -1.09 2.24
 0 8 0 239.03 13.25
 0 8 -1 462.7 20.22
 0 8 1 458.26 20.38
 0 8 2 208.55 12.79
 0 8 -2 218.42 12.53
 0 8 -3 716.98 27.62
 0 8 3 647.72 27.61
 0 -8 -4 8.15 1.44
 0 8 4 7.35 2.38
 0 8 -4 8.68 2.49
 0 8 -5 98.63 8.62
 0 8 5 87.35 8.63
 0 8 -6 30.38 4.92
 0 8 -6 33.36 5.1
 0 8 6 34.68 5.54
 0 -8 6 29.59 4.81
 0 -8 -6 37.44 5.27
 0 -8 -7 64.63 7.27
 0 8 -7 64.25 7.38
 0 8 -7 58.91 7.35
 0 8 -8 175.19 13.53
 0 -8 -8 180.09 13.27
 0 8 -8 198.49 13.99
 0 8 8 171.9 14.01
 0 8 -9 53.02 7.3
 0 -8 -9 57.42 7.53
 0 8 -9 55.17 7.4
 0 8 9 46.54 7.19
 0 -8 -10 19.83 4.53
 0 8 -10 16.28 4.13
 0 -8 -11 17.45 4.56
 0 8 -11 13.96 4.15
 0 8 -12 255.67 19.1
 0 -8 -12 294.88 20.29
 0 8 -13 19.37 5.24
 0 -8 -13 21.38 5.27
 0 -8 -14 74.09 10.52
 0 8 -14 65.2 9.81
 0 8 -15 1.22 1.03
 0 -8 -15 2.5 0.79
 0 -8 -16 35.99 7.95
 0 8 -16 30.62 6.73
 0 8 -17 33.01 7.57
 0 -8 -17 33.8 7.73
 0 8 -18 2.62 2.02
 0 -8 -18 1.7 0.92
 0 8 -19 2 2.73
 0 -8 -19 -2.28 3.61
 0 -8 -20 9.44 4.59
 0 8 -20 9.73 4.81
 0 8 -21 3.07 3.61
 0 -8 -21 0.66 1.46
 0 8 -22 30.13 8.67
 0 9 0 0.84 0.68
 0 9 1 2.9 1.42
 0 9 -1 4.29 1.71
 0 -9 2 0.56 0.8
 0 9 -2 0.25 0.32
 0 9 -2 0.68 0.63
 0 9 2 -0.2 0.36
 0 9 -3 440.69 20.22
 0 9 3 383.91 20.06
 0 -9 -3 397.3 18.95
 0 -9 3 369 19.37
 0 9 -4 238.67 14.2
 0 -9 -4 253.51 13.98
 0 -9 -4 198.84 6.87
 0 9 4 218.38 14.33
 0 -9 4 223.21 14.23
 0 -9 -5 4.39 1.76
 0 -9 5 3.17 1.63
 0 9 5 5.51 2.49
 0 -9 -5 2.45 0.78
 0 9 -5 3.71 1.71
 0 9 6 -0.09 0.99
 0 9 -6 1.34 1.33
 0 9 -6 1.76 1.19
 0 -9 -6 2.99 1.72
 0 -9 6 2.88 1.75
 0 9 6 2.19 1.57
 0 -9 7 0.89 0.42
 0 9 -7 1.88 1.21
 0 9 7 5.03 2.43
 0 9 -7 3.34 1.88
 0 -9 -7 2.51 1.46
 0 -9 -8 5.66 2.17
 0 9 -8 6.21 2.69
 0 9 -9 0.49 1.26
 0 -9 -9 2.03 1.52
 0 9 -10 7.5 2.75
 0 -9 -10 7.22 2.95
 0 -9 -11 22.9 5.36
 0 9 -11 17.74 4.59
 0 9 -12 187.4 16.3
 0 -9 -12 231.44 17.98
 0 9 -13 233.38 18.92
 0 -9 -13 272.7 20.36
 0 9 -14 74.05 10.5
 0 -9 -14 86.03 11.53
 0 -9 -15 178.95 17.43
 0 9 -15 168.46 16.67
 0 9 -16 2.62 2.48
 0 -9 -16 7.29 3.3
 0 -9 -17 118.96 14.94
 0 9 -17 79.65 12.19
 0 -9 -18 95.41 13.88
 0 9 -18 72.35 12.01
 0 9 -19 8.29 3.67
 0 -9 -19 11.22 4.21
 0 -9 -20 6.97 3.75
 0 9 -20 9.96 4.57
 0 9 -21 30.27 8.74
 0 -9 -21 38.84 9.52
 0 10 0 35.85 5.18
 0 -10 0 27.31 4.38
 0 10 -1 19.51 3.74
 0 -10 -1 14.93 3.24
 0 -10 1 12.75 2.97
 0 10 1 14.71 3.36
 0 10 2 186.59 13.08
 0 -10 -2 167.63 11.85
 0 -10 2 170.08 12.23
 0 10 -2 194.32 12.81
 0 -10 3 356.25 19.28
 0 10 3 367.37 19.98
 0 10 -3 425.17 20.13
 0 -10 -3 414.14 19.43
 0 10 -4 2.41 1.72
 0 -10 4 0.97 1.27
 0 -10 -4 1.41 1.04
 0 10 4 0.4 0.92
 0 -10 -5 35.8 5.28
 0 -10 -5 29.97 2
 0 -10 5 31.72 5.37
 0 -10 -6 29.52 4.93
 0 -10 6 24.75 4.78
 0 10 -6 26.93 5.2
 0 -10 -6 33.93 3.52
 0 -10 -7 214.36 14.38
 0 10 -7 193.61 14.86
 0 -10 7 194.38 14.59
 0 -10 -8 21.92 4.48
 0 10 -8 23.7 5.06
 0 10 -9 5.66 2.49
 0 -10 -9 7.58 2.51
 0 10 -10 204.86 16.76
 0 -10 -10 242.44 17.33
 0 -10 -11 494.39 26.96
 0 10 -11 403.4 25.28
 0 -10 -12 75.94 10.02
 0 10 -12 62.68 9.18
 0 10 -13 105.51 12.62
 0 -10 -13 127.28 13.74
 0 -10 -14 91.19 11.9
 0 10 -14 75.7 10.85
 0 10 -15 195.05 18.47
 0 -10 -15 231.52 20.15
 0 10 -16 193.78 19.15
 0 -10 -16 212.91 20.02
 0 -10 -17 -0.37 1.58
 0 10 -17 3.58 3.26
 0 -10 -18 116.14 15.37
 0 10 -18 108.78 14.87
 0 10 -19 3 3.16
 0 -10 -19 -1.44 1.46
 0 10 -20 13.26 5.47
 0 -10 -20 12.63 5.28
 0 -11 0 0.91 0.47
 0 -11 -1 0.52 0.92
 0 -11 1 0.65 0.29
 0 -11 -2 109.4 9.73
 0 -11 2 111.88 10.02
 0 -11 -3 16.01 3.59
 0 11 -3 19.07 1.54
 0 -11 3 14.89 3.75
 0 11 -4 3.23 2.5
 0 -11 4 7.84 2.92
 0 -11 -4 6.14 2.54
 0 -11 -5 73.21 8.07
 0 -11 5 73.84 8.72
 0 -11 6 42.85 6.75
 0 -11 -6 52.74 6.93
 0 -11 -6 53.33 3.05
 0 11 -7 51.41 7.85
 0 -11 -7 59.78 4.44
 0 -11 -7 52.92 7.13
 0 -11 7 51.46 7.59
 0 -11 -8 158.73 13.25
 0 -11 -8 167 12.92
 0 11 -8 138.41 13.17
 0 11 -9 236.52 18.01
 0 -11 -9 287.19 18.33
 0 11 -10 27.76 5.93
 0 -11 -10 35.51 6.38
 0 -11 -11 38.02 6.86
 0 11 -11 29.67 6.48
 0 -11 -12 0.27 1.2
 0 11 -12 -0.22 1.05
 0 11 -13 60.02 9.7
 0 -11 -13 70.14 10.23
 0 -11 -14 58.16 9.47
 0 11 -14 44.81 8.66
 0 -11 -15 34.6 7.41
 0 11 -15 32.39 7.37
 0 11 -16 1.1 1.6
 0 -11 -16 1.01 0.59
 0 -11 -17 41.9 8.83
 0 11 -17 40.35 8.82
 0 11 -18 28.03 7.38
 0 -11 -18 35.22 8.68
 0 -11 -19 7.87 4.03
 0 11 -19 8.81 4.16
 0 -12 0 11.5 3.1
 0 -12 1 2.72 1.11
 0 -12 -1 0.67 0.63
 0 -12 2 53.53 7.16
 0 -12 -2 49.47 6.62
 0 -12 3 12.67 3.47
 0 -12 -3 15.11 3.85
 0 -12 -4 49.17 6.78
 0 12 -4 55.18 3.67
 0 -12 4 40.39 6.57
 0 12 -5 7.22 3.96
 0 -12 -5 6.4 2.58
 0 -12 5 9.37 3.03
 0 -12 -6 120.04 11.15
 0 -12 6 103.72 11.02
 0 12 -7 24.11 5.3
 0 -12 -7 29.26 5.47
 0 -12 7 22.35 5.02
 0 -12 -7 23.35 1.98
 0 -12 -8 419.24 15.34
 0 -12 8 389.93 24.03
 0 12 -8 379.46 24.22
 0 -12 -8 421.69 23.7
 0 -12 -9 3.95 1.61
 0 -12 -9 3.44 1.88
 0 12 -9 5.01 2.91
 0 12 -10 195.32 17.03
 0 -12 -10 229.32 17.25
 0 -12 -10 187.46 16.14
 0 -12 -11 0.58 0.82
 0 12 -11 2.91 2.18
 0 -12 -12 11.37 4.24
 0 12 -12 4.07 2.36
 0 12 -13 27.82 6.7
 0 -12 -13 25.28 5.8
 0 -12 -14 51.65 9.09
 0 12 -14 37.09 7.91
 0 12 -15 6.42 3.81
 0 -12 -15 2.13 1.95
 0 -12 -16 1.06 1.07
 0 12 -16 1.01 1.62
 0 -12 -17 0.32 0.45
 0 12 -17 6.13 3.8
 0 -12 -18 32.46 8.14
 0 12 -18 24.05 7.06
 0 -13 0 3.14 1.62
 0 -13 -1 40.34 6.34
 0 -13 1 41.63 6.58
 0 -13 2 12.18 3.42
 0 -13 -2 12.59 3.47
 0 -13 -3 62.68 7.89
 0 -13 3 61.09 8.33
 0 -13 -4 14.66 3.68
 0 -13 4 15.44 4.27
 0 -13 5 39.86 7.1
 0 -13 -5 35.37 5.99
 0 13 -5 48.52 3.86
 0 -13 6 82.11 9.89
 0 13 -6 65.71 9.6
 0 -13 -6 86.87 9.67
 0 13 -7 155.98 14.7
 0 -13 -7 182.89 14.71
 0 -13 7 162.74 14.81
 0 13 -8 39.94 7.32
 0 -13 8 43.92 7.57
 0 -13 -8 41.87 7.03
 0 -13 -9 119.14 12.23
 0 13 -9 127.86 13.74
 0 13 -10 7.2 3.38
 0 -13 -10 6.03 3.3
 0 13 -11 12.14 3.9
 0 -13 -11 16.68 4.78
 0 -13 -12 99.95 12.03
 0 13 -12 105.5 13.01
 0 13 -13 75.18 11.3
 0 -13 -13 79.9 11.03
 0 -13 -14 1.03 2.05
 0 13 -14 -0.28 1.6
 0 13 -15 9 4.33
 0 -13 -15 8.23 3.79
 0 13 -16 3.15 2.77
 0 -13 -16 0.31 1.51
 0 13 -17 12.01 5.06
 0 -13 -17 9.95 4.3
 0 -14 0 36.62 6.44
 0 -14 -1 34.44 6.03
 0 -14 1 33.45 6.28
 0 -14 2 3.42 1.97
 0 -14 -2 1.83 0.56
 0 -14 -3 175.42 14.55
 0 -14 3 169.95 15
 0 -14 4 32.85 6.4
 0 -14 -4 41.75 6.75
 0 -14 5 88.73 10.83
 0 -14 -5 96.48 10.62
 0 -14 -6 28.43 5.72
 0 -14 6 30.64 6.22
 0 -14 -7 37.03 6.77
 0 -14 7 38.46 7.21
 0 14 -7 30.96 6.73
 0 14 -8 -0.14 1.61
 0 -14 8 -0.6 1.48
 0 -14 -8 -0.56 1.28
 0 14 -9 0.84 1.65
 0 -14 -9 0.37 1.07
 0 14 -10 37.28 7.61
 0 -14 -10 48.39 8.03
 0 -14 -11 2.54 2.15
 0 14 -11 3 2.37
 0 -14 -12 2.69 2.35
 0 14 -12 1.47 1.2
 0 -14 -13 86.12 11.82
 0 14 -13 77.23 11.78
 0 14 -14 8.85 3.77
 0 -14 -14 9.74 3.84
 0 14 -15 0.46 1.97
 0 -14 -15 -1.12 1.89
 0 14 -16 46.75 9.86
 0 -14 -16 67.45 11.19
 0 -15 0 2.8 2.16
 0 -15 1 24.78 5.51
 0 -15 -1 24.95 5.62
 0 -15 -2 0.13 0.79
 0 -15 2 1.01 0.49
 0 -15 -3 179.54 15.37
 0 -15 3 172.97 15.77
 0 -15 4 95.29 11.8
 0 -15 -4 107.87 11.67
 0 -15 5 9.68 3.69
 0 -15 -5 13.64 4.16
 0 -15 -6 4.99 2.98
 0 -15 6 7.97 3.58
 0 15 -7 8.38 3.59
 0 -15 -7 9.82 3.34
 0 -15 7 10.02 4.08
 0 -15 8 5.47 2.5
 0 -15 -8 3.17 1.73
 0 15 -8 4.8 2.79
 0 -15 -9 2.56 2.45
 0 15 -9 -0.55 1.26
 0 -15 -10 28.27 6.42
 0 15 -10 19.63 5.82
 0 15 -11 14.33 4.96
 0 -15 -11 19.19 5.28
 0 -15 -12 5.06 3.1
 0 15 -12 2.78 2.73
 0 -15 -13 4.12 2.55
 0 15 -13 4.41 2.77
 0 -15 -14 1.72 0.73
 0 15 -14 2.42 1.01
 0 -16 0 2.1 1.75
 0 -16 -1 59.01 8.94
 0 -16 1 59.83 9.08
 0 -16 -2 20.01 5.07
 0 -16 2 19.84 5.37
 0 -16 -3 28.16 6.09
 0 -16 3 28.14 6.49
 0 -16 4 9.44 4.01
 0 -16 -4 7.37 2.99
 0 -16 5 8.39 3.56
 0 -16 -5 16.05 4.75
 0 -16 6 141.18 15
 0 -16 -6 153.09 14.9
 0 16 -7 54.48 9.49
 0 -16 7 48.86 8.77
 0 -16 -7 64.15 9.64
 0 -16 8 10.11 4.07
 0 -16 -8 12.36 4.25
 0 16 -8 10.99 4.03
 0 -16 -9 10.82 4.28
 0 16 -9 14.61 5.21
 0 16 -10 25.71 6.83
 0 -16 -10 31.11 6.89
 0 16 -11 25.9 6.9
 0 -16 -11 39.74 8.13
 0 16 -12 -1.66 2.25
 0 -16 -12 -1.01 1.59
 0 -17 0 1.19 1.41
 0 -17 -1 18.03 5.08
 0 -17 1 23.34 5.97
 0 -17 2 14.59 5.03
 0 -17 -2 11.1 3.79
 0 -17 3 1.54 2.11
 0 -17 -3 -1.07 1.92
 0 -17 -4 0.75 0.49
 0 -17 4 2.51 2.05
 0 -17 5 -0.45 0.85
 0 -17 -5 0.87 2.37
 0 -17 -6 11.18 4.24
 0 -17 6 8.67 3.38
 0 17 -6 6.43 3.28
 0 -17 7 0.17 1.44
 0 -17 -7 4.23 3.07
 0 17 -7 2.57 2.49
 0 -17 -8 1 0.92
 0 -17 8 1.43 2.44
 0 -17 -9 138.62 15.3
 0 17 -9 115.36 14.93
 0 -17 -10 36.43 7.67
 0 17 -10 44.63 9.29
 0 -18 0 8.18 3.79
 0 -18 1 0.61 2.86
 0 -18 -1 0.09 0.74
 0 -18 -2 55.37 9.56
 0 -18 2 61.14 10.12
 0 -18 -3 13.02 4.33
 0 -18 3 16.64 5.53
 0 -18 -4 28.08 6.76
 0 -18 4 29.87 7.17
 0 -18 5 2.36 2.7
 0 -18 -5 5.5 2.98
 0 18 -6 0.7 2.62
 0 -18 6 0.87 1.39
 0 -18 -6 -1.71 1.94
 1 0 -25 -1.46 2.81
 1 0 -24 4.15 3.36
 1 0 -23 1.1 2.18
 1 0 -22 4.98 3.78
 1 0 -21 -0.69 1.49
 1 0 -20 7.91 3.48
 1 0 -19 0.54 1.37
 1 0 -18 0.03 0.31
 1 0 -17 -0.47 0.99
 1 0 -16 38.7 7.92
 -1 0 15 0.02 1.07
 1 0 -15 -0.13 0.8
 1 0 -14 37.51 7.23
 -1 0 14 31.3 5.53
 -1 0 13 0.04 0.83
 1 0 -13 -0.79 1.45
 -1 0 12 98.54 9.48
 -1 0 12 172.41 18.9
 -1 0 11 0.08 0.58
 1 0 -10 373.22 20.4
 -1 0 10 303.12 16.59
 -1 0 9 0.54 0.83
 1 0 -9 0.39 1.33
 -1 0 8 1069.44 38.31
 1 0 -8 1234.13 41.42
 -1 0 7 4.47 1.91
 1 0 -7 1 1.47
 -1 0 6 5575.76 157.87
 1 0 -6 5830.19 159.37
 -1 0 5 3.69 1.49
 1 0 -5 1.15 2
 1 0 -4 9729.09 260.49
 -1 0 4 9654.84 259.83
 -1 0 3 0.09 0.17
 1 0 -3 0.44 0.43
 1 0 -2 9999 269.57
 1 0 -1 0.51 0.23
 1 0 0 516.92 16.72
 -1 0 -1 0.2 0.24
 1 0 1 0.11 0.17
 -1 0 -2 1198.44 36.08
 1 0 2 1149.33 35.51
 1 0 3 0.42 0.39
 -1 0 -3 3.56 1.68
 -1 0 -4 5012.16 139.75
 1 0 4 4883.42 138.75
 -1 0 -5 3.63 2.33
 1 0 5 -0.11 1.01
 -1 0 -6 31.25 4.53
 1 0 6 24.17 3.68
 1 0 7 -0.49 0.84
 1 0 8 57.99 6.5
 1 0 9 -0.11 0.29
 1 0 10 171.26 12.73
 1 0 11 -0.46 0.83
 -1 0 -12 184.08 16.24
 1 0 12 144.86 12.51
 1 0 13 0.09 0.14
 -1 0 -13 0.23 0.69
 -1 0 -14 8.11 4.01
 -1 0 -15 0.4 0.71
 -1 0 -16 81.56 12.45
 -1 0 -17 -0.67 2.05
 -1 0 -18 41.65 9.41
 -1 0 -19 1.01 0.71
 -1 0 -20 17.23 6.41
 -1 0 -21 0.26 2.63
 -1 0 -22 83.61 15.18
 -1 0 -23 -1.44 3.05
 1 -1 -25 33.1 9.51
 1 1 -25 28.51 9.41
 1 -1 -24 -0.81 1.84
 1 1 -24 -0.4 2.43
 1 1 -23 11.48 5.09
 1 -1 -23 11.32 6.3
 1 1 -22 160.47 20.13
 1 -1 -22 159.51 19.74
 1 1 -21 213.02 22.63
 1 -1 -21 191.11 21.32
 1 -1 -20 47.2 10.15
 1 1 -20 53.16 10.67
 1 -1 -19 4.9 3.13
 1 1 -19 5.68 3.77
 1 -1 -18 12.57 4.63
 1 1 -18 18.41 5.84
 1 -1 -17 28.87 6.98
 1 1 -17 36.91 7.99
 1 1 -16 72.91 11.03
 1 -1 -16 65.88 10.16
 1 1 -15 16.79 5.01
 1 -1 -15 20.99 5.26
 -1 1 15 13.8 3.77
 -1 -1 15 17.75 4.34
 -1 1 14 1.28 1.11
 1 1 -14 1.73 1.73
 -1 -1 14 1.11 1.43
 1 -1 -14 1.02 0.56
 1 1 -13 76.38 9.61
 1 -1 -13 88.48 10.57
 -1 -1 13 66.81 7.99
 -1 1 13 67.4 7.98
 -1 -1 12 166.68 12.82
 -1 1 12 244.16 22.56
 -1 1 12 156.77 12.37
 -1 -1 12 264.14 23.4
 -1 -1 11 100.15 9.07
 -1 1 11 94.29 8.8
 -1 1 11 119.06 15.91
 -1 1 10 1003.17 57.99
 1 -1 -10 1159.68 42.55
 1 1 -10 1137.37 41.7
 -1 1 10 989.08 38.43
 -1 -1 10 1037.08 38.82
 1 -1 -9 5.16 2.51
 1 1 -9 3.11 1.41
 -1 1 9 2.9 1.11
 -1 -1 9 4.32 1.81
 -1 -1 8 109.74 8.36
 -1 1 8 117.68 8.71
 1 1 -8 128.59 9.58
 1 -1 -8 126.04 9.69
 1 -1 -7 3.02 1.33
 -1 -1 7 3.08 1.22
 -1 1 7 2.17 0.96
 1 1 -7 1.87 1.08
 1 1 -6 4116.84 116.62
 1 -1 -6 4351.29 117.77
 -1 -1 6 4150.76 116.19
 -1 -1 5 2470.66 71.51
 1 1 -5 2555.19 71.72
 1 -1 -5 2566.33 72.21
 -1 1 5 2320.76 71.23
 1 -1 -4 6408.57 207.87
 1 1 -4 7195.34 188.82
 -1 -1 4 7377.53 188.96
 1 -1 -4 7423.96 189.15
 -1 1 4 6460.03 188.82
 -1 -1 3 875.2 26.05
 1 -1 -3 933.34 26.15
 1 1 -3 943.15 32.73
 1 1 -3 824.16 25.8
 -1 1 3 821.39 25.85
 1 1 -2 243.85 8.77
 1 -1 -2 249.33 8.69
 -1 1 2 272.22 10.28
 1 -1 -2 265.87 10.06
 1 1 -1 139.49 6.09
 -1 1 1 132.01 5.85
 1 -1 -1 128.69 5.92
 1 1 0 1616.72 42.47
 1 1 0 1533.32 41.97
 1 -1 0 1477.61 41.7
 1 1 0 1456.89 43.02
 -1 1 0 1482.93 41.5
 1 -1 0 1413.87 43.07
 -1 -1 0 1438.41 41.5
 -1 1 0 1620.83 42.12
 -1 1 -1 3925.89 112.8
 1 -1 1 3964.94 112.58
 1 1 1 3869.2 113.27
 -1 1 -2 206.49 8.97
 1 -1 2 192.66 8.63
 1 1 2 192.24 9.09
 -1 -1 -2 202.88 9.19
 -1 1 -3 582.7 20.67
 1 1 3 570.95 20.94
 1 -1 3 580.97 20.34
 -1 -1 -3 535.17 20.46
 -1 1 -4 1325.16 41.76
 1 -1 4 1255.77 40.56
 -1 -1 -4 1253.42 41.72
 1 1 4 1305.07 42.05
 1 1 5 465.15 20.4
 -1 -1 -5 532.25 21.89
 -1 1 -5 536.89 21.67
 1 -1 5 501.31 20.32
 1 -1 6 1001.79 35.86
 -1 -1 -6 1097.48 38.55
 -1 1 -6 1109.1 38.29
 1 1 6 968.55 36.32
 1 -1 7 0.45 0.85
 -1 1 -7 0.95 0.68
 1 1 7 0.57 0.47
 1 1 8 3.53 1.46
 1 -1 8 2.99 1.55
 1 -1 9 224.33 14.36
 1 1 9 234.64 15.11
 1 1 10 75.13 8.3
 1 -1 10 75.09 8.08
 1 1 11 66.89 7.94
 1 -1 11 74.83 8.35
 1 1 12 3.96 1.81
 1 -1 12 3.76 2.03
 -1 1 -12 4.13 2.56
 -1 -1 -12 2.64 1.99
 -1 1 -13 49.37 8.95
 -1 1 -13 42.78 7.85
 -1 -1 -13 43.6 8.29
 1 1 13 36.6 6.19
 -1 -1 -13 54.63 8.94
 1 -1 13 37.35 6.38
 -1 -1 -14 14.6 4.69
 -1 1 -14 10.59 4.06
 -1 -1 -15 17.97 5.68
 -1 1 -15 14.42 4.81
 -1 -1 -16 69.75 11.31
 -1 1 -16 70.7 11.57
 -1 1 -17 5.32 3.28
 -1 -1 -17 3.89 3.56
 -1 1 -18 23.47 6.82
 -1 -1 -18 34.83 8.36
 -1 -1 -19 71.07 12.51
 -1 1 -19 81.37 14.15
 -1 1 -20 461.15 35.59
 -1 -1 -20 440.99 34.17
 -1 -1 -21 2.04 3.2
 -1 1 -21 3.47 4.62
 -1 1 -22 13.2 5.96
 -1 -1 -22 8.02 4.05
 -1 -1 -23 34.92 9.74
 -1 1 -23 45.24 11.56
 1 -2 -25 2.48 3.05
 1 2 -25 4.12 3.91
 1 2 -24 87.24 15.49
 1 -2 -24 69.52 14
 1 2 -23 15.41 6.66
 1 -2 -23 8.99 5
 1 2 -22 15.97 6.62
 1 -2 -22 17.11 6.71
 1 2 -21 6.06 4.15
 1 -2 -21 2.26 3.31
 1 2 -20 156.08 18.95
 1 -2 -20 164.15 19.28
 1 2 -19 2.35 2.98
 1 -2 -19 0.3 1.25
 1 -2 -18 13.5 4.83
 1 2 -18 9.26 4.05
 1 -2 -17 42.41 8.35
 1 2 -17 39.96 8.4
 1 2 -16 21.47 5.75
 1 -2 -16 19.09 5.15
 -1 2 15 81.97 9.6
 1 -2 -15 114.61 12.92
 1 2 -15 109.81 12.52
 1 -2 -14 -0.45 1.16
 1 2 -14 0.75 1.32
 -1 2 14 0.46 1.24
 -1 -2 14 0.68 1.39
 -1 -2 13 296.97 18.59
 -1 2 13 271.58 17.66
 1 2 -13 320.62 20.78
 1 -2 -13 334.8 21.28
 -1 2 12 9.85 5.68
 -1 -2 12 2.54 1.69
 -1 -2 12 10.05 5.65
 1 2 -12 0.21 1.39
 -1 -2 11 141.13 16.6
 -1 2 11 150.26 17.52
 -1 -2 11 121.16 10.3
 1 -2 -10 4.44 1.82
 -1 -2 10 6.39 2.04
 -1 2 10 5.88 1.94
 -1 2 9 96.73 18.54
 1 -2 -9 142.99 10.79
 1 2 -9 116.74 9.55
 -1 2 9 104.67 8.82
 -1 -2 9 125.12 9.47
 1 2 -8 430.87 19.67
 1 -2 -8 469.48 21.12
 -1 -2 8 447.67 19.83
 -1 2 8 398.1 19.09
 -1 2 7 7.47 1.99
 1 -2 -7 11.4 2.49
 1 2 -7 10.67 2.28
 -1 -2 7 13.3 2.57
 1 2 -6 51.42 4.96
 -1 -2 6 54.79 5.14
 -1 2 6 55.13 5.22
 1 2 -5 1654.01 49.51
 -1 -2 5 1726.58 49.98
 -1 2 5 1556.51 49.41
 -1 2 4 293.35 12.08
 1 2 -4 284.53 11.94
 1 2 -4 300.25 12.2
 1 -2 -4 315.13 12.19
 1 -2 -4 302.57 17.89
 1 2 -3 1715.53 54.7
 1 -2 -3 1646.78 48.06
 1 2 -3 1534.94 47.92
 1 2 -3 1616.73 48.12
 1 -2 -3 1984.14 50.15
 -1 2 3 2030.95 50.31
 -1 2 2 44.93 3.04
 -1 -2 2 46.01 3.11
 1 2 -2 47.17 3.04
 1 -2 -2 48.49 3.31
 1 2 -2 57.46 3.78
 1 -2 -2 47.37 2.97
 -1 2 2 49.18 3.44
 -1 -2 2 41.88 4.19
 1 -2 -1 52.41 2.9
 -1 -2 1 46.48 2.83
 -1 2 1 48.65 3.15
 1 2 -1 50.05 3.26
 1 2 -1 51.86 2.94
 -1 -2 1 49.02 3.06
 1 -2 -1 49.59 3.23
 -1 2 1 47.91 2.79
 -1 2 0 1286.01 36.99
 -1 2 0 1317.88 37.7
 1 2 0 1351.4 37.47
 1 2 0 1296.34 37.57
 1 -2 0 1335.4 37.42
 -1 -2 0 1277.29 36.87
 -1 -2 0 1239.14 37.16
 1 2 1 546.51 18.36
 -1 2 -1 557.4 18.22
 1 2 1 549.82 18.1
 -1 2 -1 520.12 17.46
 -1 -2 -1 531.11 17.41
 1 -2 1 526.24 17.7
 -1 -2 -2 916.01 29.65
 1 -2 2 915.35 29.66
 1 2 2 966.92 30.69
 -1 -2 -2 967 30.15
 -1 2 -2 979.98 30.29
 -1 2 -2 932.94 29.45
 1 -2 3 2581.29 78.68
 -1 -2 -3 3034.99 81.18
 1 2 3 2594.39 79.5
 -1 2 -3 2871.53 79.88
 -1 -2 -4 333.26 15.41
 1 -2 4 348.32 14.91
 -1 2 -4 338.83 15.12
 1 2 4 328.91 15.31
 1 2 5 859.14 32.3
 -1 2 -5 898.21 32.01
 -1 -2 -5 909.63 32.79
 1 -2 5 901.55 31.54
 1 -2 6 2070.34 65.18
 -1 -2 -6 2103.29 66.84
 -1 2 -6 2211.17 66.82
 1 2 6 2000.65 66.19
 -1 2 -7 1397.23 47.76
 1 2 7 1340.45 47.65
 1 -2 7 1308 45.82
 1 -2 8 326.47 17.41
 1 2 8 308.92 17.58
 1 2 9 864.42 36.1
 1 -2 9 937.6 35.96
 1 -2 10 2.22 1.59
 1 2 10 0.72 0.4
 -1 2 -11 482.21 27.32
 -1 -2 -11 483.74 27.25
 1 2 11 534.65 26.51
 1 -2 11 551.4 26.35
 1 2 12 27.74 5.36
 -1 2 -12 30 6.27
 -1 -2 -12 25.48 5.69
 1 -2 12 35.33 5.94
 -1 2 -13 0.25 1.05
 -1 -2 -13 1.55 1.18
 -1 2 -14 53.65 8.95
 -1 -2 -14 57.14 9.27
 -1 -2 -15 62.36 10.19
 -1 2 -15 62.19 10.34
 -1 -2 -16 2.7 2.89
 -1 2 -16 4.01 2.96
 -1 -2 -17 1.53 2.89
 -1 2 -17 -1.36 0.67
 -1 -2 -18 183.68 19.86
 -1 2 -18 178.67 20.34
 -1 -2 -19 365.58 29.85
 -1 2 -19 372.58 31.07
 -1 -2 -20 84.4 14.57
 -1 2 -20 113.69 17.04
 -1 2 -21 88.62 15.78
 -1 -2 -21 109.76 16.82
 -1 2 -22 105.42 17.39
 -1 -2 -22 113.06 17.89
 -1 -2 -23 14.96 6.8
 -1 2 -23 12.79 6.25
 1 -3 -25 2.75 3.02
 1 -3 -24 19.64 7.73
 1 3 -24 23.99 7.64
 1 -3 -23 31.95 8.93
 1 3 -23 36.04 9.9
 1 3 -22 0.01 2.74
 1 -3 -22 -1.52 2.38
 1 -3 -21 3.71 3.65
 1 3 -21 6.16 5.36
 1 3 -20 222.72 22.8
 1 -3 -20 213.44 22
 1 3 -19 19.59 5.94
 1 -3 -19 22.92 6.8
 1 -3 -18 8.47 3.75
 1 3 -18 2.39 1.3
 1 3 -17 58.34 9.9
 1 -3 -17 52.68 9.63
 1 3 -16 31.46 7.02
 1 -3 -16 38.2 7.78
 1 3 -15 349.35 23.71
 1 -3 -15 351.06 24.23
 -1 3 14 3.85 2.3
 -1 -3 14 2.27 1.08
 1 -3 -14 3.8 1.98
 1 3 -14 1.98 2.09
 1 3 -13 17.28 4.43
 -1 -3 13 12.85 3.52
 -1 3 13 15.8 4.07
 1 -3 -13 15.61 4.3
 -1 3 12 1.85 1.64
 -1 -3 12 0.84 0.77
 1 3 -12 3.07 2.04
 1 -3 -12 -0.25 0.61
 -1 -3 11 683.02 30.35
 -1 3 11 595.92 28.9
 -1 -3 10 312.99 17.24
 -1 3 10 262.04 25.36
 -1 3 10 259.33 15.89
 -1 -3 9 14.91 3.32
 -1 3 9 15.85 3.46
 1 -3 -9 17.83 3.81
 1 3 -9 15.45 3.28
 -1 3 9 11.94 6.85
 -1 -3 8 151.52 10.4
 -1 -3 8 136.19 22.51
 -1 3 8 127.15 9.79
 1 -3 -8 154.96 11.05
 1 3 -8 146.64 10.2
 -1 3 7 368.92 18.06
 1 3 -7 393.32 18.3
 -1 -3 7 421.46 18.89
 1 3 -6 280.46 13.41
 1 -3 -6 300.99 14.05
 1 3 -6 281.01 13.45
 1 -3 -5 439.95 17.54
 1 3 -5 416.57 16.89
 1 3 -5 402.08 16.68
 -1 3 5 407.06 16.73
 1 -3 -4 163.96 8.58
 1 -3 -4 182.32 10.96
 1 3 -4 149.93 8.25
 1 3 -4 157.18 8.54
 1 -3 -3 10.38 1.64
 -1 3 3 4.5 2.61
 1 3 -3 10.92 2.46
 -1 3 3 8.29 1.57
 1 -3 -3 9.6 1.61
 -1 -3 3 9.71 1.65
 1 3 -3 7.94 1.46
 1 3 -2 93.25 4.98
 1 -3 -2 79.56 4.44
 1 -3 -2 81.43 4.6
 -1 3 2 87.38 4.85
 -1 3 2 73.6 4.6
 1 3 -2 82.97 4.78
 -1 -3 2 70.91 4.55
 -1 3 1 204.53 8.48
 -1 -3 1 235.02 8.53
 -1 3 1 217.45 8.42
 1 3 -1 225.23 8.89
 1 -3 -1 208.76 8.37
 1 3 -1 231.37 8.62
 -1 -3 1 205.74 8.58
 1 -3 -1 220.95 8.76
 -1 3 0 8.87 1.32
 -1 -3 0 7.52 1.19
 1 3 0 9.92 1.5
 1 -3 0 7 1.25
 1 3 0 9.8 1.32
 -1 -3 0 7.84 1.11
 -1 3 0 8.81 1.34
 -1 -3 -1 893.51 27.74
 -1 3 -1 952.99 29.02
 1 -3 1 929.9 29.52
 1 3 1 979.63 29.64
 -1 -3 -1 940.03 28.88
 -1 3 -2 717.18 24.19
 1 3 2 672.37 23.84
 1 3 2 695.7 24.33
 -1 3 -2 701.11 23.44
 -1 -3 -2 687.52 23.21
 1 -3 2 671.39 23.53
 -1 3 -3 4353.94 127.25
 1 -3 3 4451.16 127.13
 -1 -3 -3 4414.28 126.68
 -1 3 -3 4477.99 126.76
 1 -3 4 504.1 20.06
 -1 3 -4 511.93 20.62
 -1 3 -4 501.9 19.94
 -1 -3 -4 529.88 21.09
 1 3 4 482.45 20.71
 -1 3 -5 1705.35 54.5
 1 -3 5 1627.49 53.72
 -1 3 -6 9.62 2.4
 1 3 6 8.89 2.5
 1 -3 6 6.26 1.65
 1 3 7 583.21 26.58
 -1 3 -7 640.31 26.83
 1 -3 7 621.14 25.99
 1 -3 8 -0.46 1.01
 1 3 8 -0.32 1.08
 1 -3 9 75.09 7.99
 1 3 9 69.26 8.17
 1 -3 10 52.44 6.92
 1 3 10 37.55 6
 -1 3 -11 1273.82 49.56
 1 3 11 1068.22 45.21
 -1 -3 -11 1279.07 50.27
 1 -3 11 1127.97 45.12
 -1 3 -12 61.66 9.08
 1 3 12 42.7 6.96
 1 -3 12 46.38 7.05
 -1 -3 -12 59.66 9.04
 -1 -3 -12 63.75 9.95
 -1 3 -13 192.3 17.21
 -1 -3 -13 209.67 18.16
 -1 -3 -13 188.83 18.35
 -1 -3 -14 84.32 11.87
 -1 3 -14 90.34 12.14
 -1 3 -15 11.02 4.39
 -1 -3 -15 7.44 3.74
 -1 3 -16 243.27 21.81
 -1 -3 -16 254.03 22.65
 -1 -3 -17 253.64 23.24
 -1 3 -17 223.03 21.56
 -1 -3 -18 148.8 18.13
 -1 3 -18 150.73 18.38
 -1 3 -19 80.57 13.96
 -1 -3 -19 85.74 14.12
 -1 -3 -20 57.46 11.66
 -1 3 -20 54.56 11.52
 -1 3 -21 16.85 6.65
 -1 -3 -21 9.99 4.58
 -1 -3 -22 -1.06 2.15
 -1 3 -22 1.99 2.07
 -1 -3 -23 2.69 0.84
 -1 3 -23 0.81 1.36
 1 -4 -24 3.22 2.92
 1 4 -24 2.57 3.71
 1 4 -23 22.53 7.46
 1 -4 -23 20.73 7.52
 1 4 -22 24.36 7.83
 1 -4 -22 29.67 8.41
 1 -4 -21 5.19 3.81
 1 4 -21 0.29 1.58
 1 -4 -20 2.85 1.83
 1 4 -20 0.5 1.42
 1 -4 -19 -0.12 0.96
 1 4 -19 2.62 2.87
 1 -4 -18 40.17 9.01
 1 4 -18 42.49 9
 1 4 -17 180.59 18
 1 -4 -17 215.84 19.97
 1 4 -16 2.94 2.68
 1 -4 -16 2.9 2.88
 1 4 -15 212.08 18.32
 1 -4 -15 240.56 19.76
 1 4 -14 402.54 24.25
 1 -4 -14 459.44 26.82
 -1 -4 13 99.67 10.54
 -1 4 13 82.46 9.47
 1 -4 -13 117.3 12.47
 1 4 -13 91.84 10.34
 1 -4 -12 40.22 7.05
 1 4 -12 37.25 6.13
 -1 4 12 31.65 5.47
 -1 -4 12 40.86 6.33
 -1 -4 11 0.45 0.49
 -1 4 11 1.24 0.93
 1 4 -11 0.68 0.32
 -1 4 10 127.99 16.26
 -1 -4 10 133.86 10.92
 -1 4 10 109.37 10.14
 1 4 -9 215.16 13.76
 -1 4 9 220.4 14.19
 1 4 -8 691.69 27.73
 1 -4 -8 759.99 28.88
 1 4 -8 719.86 28.04
 -1 4 7 178.12 11.24
 1 4 -7 200.52 11.94
 1 4 -7 182.07 11.42
 1 4 -6 32.79 4.17
 -1 4 6 28.85 3.93
 1 4 -6 23.98 3.59
 1 -4 -6 32.04 4.12
 -1 4 5 49.69 5.32
 1 4 -5 48.81 4.85
 1 -4 -5 48.87 4.77
 1 4 -5 42.9 4.51
 1 -4 -5 42.06 6.61
 1 -4 -4 132.17 7.72
 -1 4 4 123.38 7.88
 1 -4 -4 154.06 8.11
 1 4 -4 91.02 13.44
 -1 -4 4 114.73 7.45
 1 4 -4 124.4 7.63
 -1 4 3 762.24 27.56
 1 -4 -3 838.47 27.44
 -1 -4 3 768.5 27.67
 1 4 -3 827.04 27.71
 1 4 -2 656.81 21.88
 -1 4 2 596.29 21.53
 1 -4 -2 632.41 21.45
 -1 4 2 699.09 21.62
 1 4 -2 700.41 21.03
 -1 -4 2 574.4 21.35
 1 -4 -2 628.9 20.3
 -1 -4 1 -0.07 0.36
 1 4 -1 0.03 0.21
 1 -4 -1 0.2 0.13
 -1 -4 1 0.42 0.44
 -1 4 1 0.23 0.12
 1 4 -1 0.05 0.13
 -1 4 1 0.5 0.35
 1 -4 -1 -0.08 0.23
 -1 4 0 639.14 21.14
 -1 -4 0 624.09 19.21
 1 4 0 646.24 21.66
 -1 4 0 652.99 19.95
 -1 -4 0 623.08 20.96
 1 -4 0 600.16 21.27
 -1 -4 -1 61.3 3.5
 -1 4 -1 69.19 4.78
 1 -4 1 71.9 5.14
 -1 -4 -1 61.22 4.49
 1 4 1 68.42 5.09
 1 -4 2 1263.85 40.28
 -1 4 -2 1306.28 39.83
 -1 -4 -2 1263.33 39.5
 1 4 2 1244.44 40.36
 1 4 3 545.16 22.22
 -1 4 -3 546.94 21.46
 1 -4 3 532.04 20.86
 -1 -4 -3 532.02 20.43
 -1 4 -3 554.04 20.84
 -1 -4 -4 632.55 24.46
 -1 4 -4 666.95 25.34
 -1 4 -4 660.44 24.85
 1 4 4 643.29 25.87
 1 4 5 3013.48 95.2
 -1 4 -5 3255.73 94.5
 1 -4 5 3180.77 94.56
 -1 4 -5 3252.95 95.44
 -1 -4 -5 3211.49 94.69
 1 4 6 5.08 2
 -1 4 -6 5.46 1.94
 1 -4 6 5.2 1.69
 -1 4 -6 8.39 2.34
 -1 4 -7 702.82 29.12
 1 -4 7 691.94 28.33
 1 4 7 623.22 28.12
 1 4 8 802.61 34.7
 1 -4 8 904.57 34.96
 1 4 9 37.97 6.18
 1 -4 9 44.17 6.18
 1 -4 10 1068.03 40.14
 -1 4 -10 947.51 40.33
 1 4 10 1021.71 41.23
 -1 -4 -11 0.51 1.15
 1 4 11 -0.26 0.3
 1 -4 11 0 0.37
 1 -4 12 2.68 1.72
 1 4 12 3.36 2.16
 -1 4 -12 5.99 2.31
 -1 -4 -12 1.64 2.11
 -1 4 -13 7.38 3.14
 -1 -4 -13 14.82 5.35
 -1 -4 -13 8.48 3.8
 -1 4 -14 140.32 15.2
 -1 -4 -14 150.63 15.78
 -1 4 -15 14.41 4.91
 -1 -4 -15 14.13 5.15
 -1 4 -16 8.37 3.93
 -1 -4 -16 9.33 3.99
 -1 4 -17 6.01 2.62
 -1 -4 -17 5.07 3.69
 -1 4 -18 210.59 21.61
 -1 -4 -18 220.27 22.35
 -1 4 -19 1.43 2
 -1 -4 -19 -2.07 2.85
 -1 -4 -20 19.39 6.75
 -1 4 -20 24.71 7.64
 -1 -4 -21 101.4 16.26
 -1 4 -21 122.18 18.29
 -1 -4 -22 34.09 9.95
 -1 4 -22 36.8 10.28
 -1 4 -23 50.42 12.32
 -1 -4 -23 65.18 13.6
 1 -5 -24 2.82 2.58
 1 5 -24 0.95 2.27
 1 5 -23 0.92 1.9
 1 -5 -23 -0.51 2.22
 1 -5 -22 5.21 3.72
 1 5 -22 2.83 2.78
 1 -5 -21 10.89 5.39
 1 5 -21 8.47 3.82
 1 5 -20 1.77 1.85
 1 -5 -20 1.26 2.79
 1 5 -19 3.65 2.16
 1 -5 -19 9.51 5.29
 1 5 -18 75.56 11.74
 1 -5 -18 139.3 18.66
 1 -5 -17 85.39 13.49
 1 5 -17 67.25 10.7
 1 5 -16 1.97 2.18
 1 -5 -16 0.47 1.44
 1 -5 -15 504.01 31.62
 1 5 -15 361.62 24.57
 1 -5 -14 32.7 7.24
 1 5 -14 23.95 5.48
 1 5 -13 185.01 15.16
 -1 5 13 162.76 14.37
 -1 -5 13 201.7 15.66
 1 -5 -13 226.46 17.85
 -1 -5 12 26.67 5.18
 1 5 -12 29.54 5.45
 1 -5 -12 25.52 5.5
 1 5 -12 20.23 4.46
 -1 5 12 20.76 4.65
 1 5 -11 6.75 2.26
 1 5 -11 12.23 3.29
 -1 5 11 7.69 2.62
 1 -5 -11 7.48 2.71
 1 -5 -10 93.02 9.65
 1 5 -10 80.87 8.49
 -1 5 10 78.61 8.52
 -1 5 10 93.98 13.15
 1 5 -10 77.66 8.3
 -1 5 9 -0.5 1.31
 1 5 -9 0.34 0.33
 -1 5 8 23.43 10.26
 1 5 -8 32.37 4.82
 -1 5 8 24 4.08
 -1 -5 8 40.94 9.71
 1 5 -7 71.64 6.94
 1 -5 -7 65.6 6.6
 1 5 -7 59.43 6.19
 -1 5 7 61.39 6.5
 -1 -5 7 62.98 12.87
 1 5 -6 149.34 9.97
 -1 5 6 157.42 10.8
 1 5 -6 168.43 10.61
 1 -5 -6 175.36 10.63
 1 -5 -6 134.81 15.63
 -1 5 5 31.52 4.05
 -1 -5 5 31.09 4.01
 1 5 -5 33.75 4.12
 1 5 -5 31.27 3.98
 1 -5 -5 33.64 4.08
 1 -5 -5 39.53 4.72
 1 5 -4 41.05 7.64
 -1 -5 4 32.49 3.88
 -1 5 4 34.41 4.09
 1 5 -4 37.6 4.14
 1 -5 -4 37.4 4.01
 1 -5 -4 41.47 3.59
 1 5 -3 557.84 20.53
 -1 5 3 493.02 20.16
 1 -5 -3 533.77 17.95
 -1 -5 3 483.01 19.96
 1 -5 -3 537.82 19.98
 -1 5 2 41.26 4.01
 1 -5 -2 43.91 3.1
 -1 5 2 51.8 4.17
 -1 -5 2 36.58 3.84
 1 5 -2 44.82 4.16
 1 -5 -2 41.76 3.92
 1 5 -2 47.95 3.37
 1 5 -1 7.21 1.14
 -1 5 1 7.83 1.17
 1 -5 -1 7.2 1.58
 -1 5 1 8.29 1.63
 -1 -5 1 7.6 1.6
 -1 -5 1 5.12 1.74
 1 5 -1 7.53 1.67
 1 5 0 17.5 2.56
 -1 -5 0 17 1.6
 -1 5 0 18.41 1.87
 -1 -5 0 16.55 2.33
 1 -5 0 17.2 2.51
 -1 5 0 17.34 2.4
 -1 -5 -1 73.9 5.32
 1 -5 1 78.32 5.87
 -1 5 -1 78.83 5.65
 -1 -5 -1 71.36 3.74
 1 5 1 78.51 5.93
 -1 -5 -2 603.27 21.99
 -1 5 -2 620.11 22.38
 1 5 2 582.24 22.9
 1 -5 2 614.66 23.05
 -1 5 -3 8.64 2.02
 -1 -5 -3 11.14 2.24
 1 -5 3 10.4 2.27
 1 5 3 10.92 2.42
 -1 5 -3 8.57 1.94
 1 5 4 50.98 6.03
 -1 -5 -4 51.14 5.24
 1 -5 4 42.87 4.94
 -1 5 -4 44.5 4.98
 -1 5 -4 44.51 5.21
 1 5 5 281.12 16.14
 -1 -5 -5 300.5 15.37
 -1 5 -5 312.78 16.25
 -1 5 -5 323.79 16.14
 -1 5 -6 2.12 0.62
 -1 -5 -6 2.28 0.97
 1 5 6 -0.06 0.5
 -1 5 -6 1.3 1.39
 -1 5 -7 233.29 14.37
 1 -5 7 234.09 14.57
 1 5 7 207.07 14.32
 -1 -5 -7 225.93 14.32
 1 -5 8 1393.06 48.71
 -1 5 -8 1374.43 48.55
 1 5 8 1232.32 48.12
 -1 -5 -8 1275.83 48.65
 -1 5 -9 280.19 18.01
 1 -5 9 298.75 18
 1 5 9 279.11 18.11
 -1 5 -9 290.96 17.56
 -1 5 -10 5.13 2.05
 -1 5 -10 4.51 1.67
 -1 -5 -10 4.08 1.84
 1 -5 10 4.82 2.05
 1 5 10 3.2 1.37
 1 -5 11 35.9 6.16
 -1 -5 -11 42.38 7.94
 1 5 11 25.56 5.38
 -1 -5 -11 33.61 6.96
 -1 5 -11 30.03 5.79
 -1 5 -12 31 6.33
 -1 -5 -12 46.19 9.13
 -1 -5 -12 34.04 7.59
 -1 5 -12 41.41 7.94
 -1 5 -13 9.41 3.51
 -1 -5 -13 1.69 1.53
 -1 -5 -13 3.37 3.4
 -1 5 -14 6.09 3.18
 -1 -5 -14 5.73 3.52
 -1 5 -15 39.43 8.15
 -1 -5 -15 43.09 8.86
 -1 5 -16 58.45 10.4
 -1 -5 -16 70.7 11.95
 -1 5 -17 98.61 13.99
 -1 -5 -17 126 16.51
 -1 -5 -18 1.23 1.62
 -1 5 -18 -1.53 3.23
 -1 5 -19 99.62 14.89
 -1 -5 -19 113.28 16.82
 -1 -5 -20 5.32 4.01
 -1 5 -20 -0.27 2.37
 -1 -5 -21 54.29 12.95
 -1 5 -21 31.04 8.83
 -1 -5 -22 35.6 11.32
 -1 5 -22 25.37 8.54
 1 -6 -24 3.99 4.02
 1 6 -23 0.95 0.97
 1 -6 -23 6.76 3.63
 1 -6 -22 32.7 8.93
 1 6 -22 23.29 7.28
 1 -6 -21 0.93 0.73
 1 6 -21 -0.61 1.77
 1 -6 -20 71.57 12.27
 1 6 -20 68.9 12
 1 6 -19 0.64 1.11
 1 -6 -19 -1.5 3.18
 1 -6 -18 0.65 1.78
 1 6 -18 5.17 3.09
 1 -6 -17 7.34 3.62
 1 6 -17 1.01 2.21
 1 -6 -16 61.23 9.8
 1 6 -16 62.3 9.71
 1 -6 -15 4.07 1.97
 1 6 -15 5.78 2.94
 1 -6 -15 3.19 2.24
 1 -6 -14 129.18 13.82
 1 6 -14 98.11 11.26
 1 -6 -13 0.98 0.82
 1 6 -13 -0.75 1.6
 -1 6 13 0.2 1.06
 1 6 -12 5.01 2.2
 1 6 -12 2.1 0.6
 1 -6 -12 2.09 1.5
 -1 6 12 2.94 1.3
 1 6 -11 141.86 12.16
 1 6 -11 155.84 12.92
 -1 6 11 136.89 12.34
 1 -6 -11 157.57 13.34
 1 6 -10 63.79 7.57
 1 6 -10 68.49 8.02
 -1 6 10 56.22 7.31
 1 -6 -10 73.93 8.39
 1 -6 -9 90.8 8.95
 -1 6 9 73.8 7.98
 1 6 -9 75.37 7.92
 1 6 -9 88.92 8.89
 -1 6 9 103.76 13.63
 -1 6 8 262.73 16.28
 -1 6 8 213.21 23.67
 1 -6 -7 68.7 12.62
 1 6 -7 63.29 6.84
 -1 -6 7 96.43 12.78
 -1 6 7 66.41 7.13
 1 6 -6 914.32 33.32
 -1 -6 6 821.47 32.59
 -1 6 6 935.29 35
 1 -6 -5 35.76 4.4
 1 6 -5 31.42 4.17
 -1 -6 5 27.97 4.03
 1 -6 -5 42.72 4.08
 1 6 -5 25.94 8.95
 -1 6 5 34.53 4.58
 1 -6 -4 16.03 2.78
 1 6 -4 15.49 2.75
 -1 -6 4 16.37 2.88
 1 -6 -4 16.73 2.09
 1 6 -4 21.87 4.71
 -1 6 4 15.05 2.79
 1 -6 -3 1294.08 41.46
 -1 -6 3 1146.72 41.31
 1 6 -3 1330.69 42.12
 -1 6 3 1195.03 41.76
 1 -6 -3 1248.13 37.99
 1 6 -2 51.09 4.77
 -1 6 2 43.14 4.44
 -1 6 2 44.09 4.94
 1 -6 -2 43.11 4.35
 1 -6 -2 40.61 2.98
 1 6 -2 49.02 3.43
 -1 -6 2 41.52 4.39
 1 6 -1 712.86 25.58
 1 6 -1 707.7 21.79
 1 -6 -1 716.38 25.45
 -1 -6 1 640.05 24.73
 -1 6 1 753.32 22.16
 -1 6 1 697.66 25.18
 -1 6 0 228.36 8.67
 -1 -6 0 225.11 8.53
 1 6 0 219.61 11.34
 1 -6 0 199.66 10.86
 -1 -6 0 208.51 10.68
 -1 6 0 207.68 10.75
 -1 -6 -1 17.21 2.56
 1 -6 1 14.02 2.54
 -1 6 -1 18.2 2.81
 -1 -6 -1 17.04 1.53
 -1 6 -1 15.1 1.91
 1 6 1 15.47 2.72
 -1 6 -2 186.89 10.41
 1 -6 2 179.9 10.71
 -1 -6 -2 186.31 10.05
 -1 -6 -2 173.68 7.14
 1 6 2 192.15 11.06
 -1 6 -3 73.64 6.38
 1 -6 3 77.36 6.78
 1 6 3 70.02 6.66
 -1 -6 -3 74.46 6.19
 1 6 4 344.32 17.68
 -1 -6 -4 343.98 16.32
 1 6 4 326.2 17.31
 -1 6 -4 352.81 16.67
 -1 6 -4 337.15 17.27
 -1 6 -5 2795.32 90.01
 -1 6 -5 2914.64 89.25
 -1 -6 -5 2806.15 88.46
 -1 -6 -6 27.05 4.37
 -1 6 -6 26.85 4.56
 -1 6 -6 32.49 4.75
 1 6 6 32.63 5.17
 -1 6 -7 111.33 9.74
 -1 -6 -7 95.88 8.97
 -1 6 -7 102.82 9.58
 1 6 7 89.06 9.3
 -1 6 -8 274.8 16.63
 -1 6 -8 237.38 16.04
 1 6 8 219.7 15.85
 -1 -6 -8 268.5 16.54
 -1 6 -9 15.44 3.85
 -1 -6 -9 15.45 3.81
 -1 6 -9 14.36 3.9
 1 6 9 16.64 4.07
 -1 6 -10 195.87 15.47
 -1 -6 -10 242.28 18.85
 1 -6 10 200.45 15.34
 1 6 10 165.65 14.48
 -1 -6 -10 217.59 16.17
 -1 6 -10 204.8 15.17
 -1 -6 -11 3.42 3.08
 -1 -6 -11 3.08 2.01
 -1 6 -11 1.1 0.8
 -1 -6 -11 -0.67 1.24
 -1 -6 -12 107.48 12.12
 -1 6 -12 93.86 12.17
 -1 6 -12 111 11.93
 -1 -6 -13 0.87 1.47
 -1 -6 -13 -0.35 2.58
 -1 6 -13 4.99 2.68
 -1 -6 -14 46.82 9.28
 -1 6 -14 40.7 7.91
 -1 -6 -15 28.56 7.2
 -1 6 -15 23.5 6.32
 -1 -6 -16 15.69 4.84
 -1 6 -16 12.12 4.7
 -1 -6 -17 180.88 20.31
 -1 6 -17 141.75 17.12
 -1 -6 -18 4.31 3.39
 -1 6 -18 9.22 4.76
 -1 -6 -19 14.5 5.33
 -1 6 -19 12.45 5.21
 -1 6 -20 49 10.85
 -1 -6 -20 49.62 11.36
 -1 6 -21 64.21 12.77
 -1 -6 -21 78.66 14.73
 -1 6 -22 80.34 15.06
 -1 -6 -22 106.83 17.52
 1 -7 -23 -2.98 4.48
 1 7 -23 0.33 1.68
 1 -7 -22 -1.86 2.58
 1 7 -22 3.85 3.15
 1 7 -21 19.02 6.68
 1 -7 -21 34.14 9.26
 1 -7 -20 56.77 11.13
 1 7 -20 57.37 10.89
 1 7 -19 9.52 4.33
 1 -7 -19 4.93 3.48
 1 -7 -18 130.85 16.03
 1 7 -18 118.86 14.77
 1 -7 -17 12.07 4.84
 1 7 -17 15.58 5.05
 1 -7 -16 57.64 9.81
 1 7 -16 68.05 10.1
 1 7 -15 1.14 1.36
 1 -7 -15 -0.89 2.45
 1 7 -14 11.11 3.7
 1 -7 -14 16.24 4.83
 1 7 -13 104.18 11.35
 1 -7 -13 118.6 12.5
 -1 7 12 149.1 13.77
 1 7 -12 165.5 14.12
 1 7 -11 8.84 3.12
 1 7 -11 12.56 3.57
 1 -7 -11 8.84 3.02
 -1 7 11 6.81 2.44
 -1 7 10 -0.73 0.9
 1 7 -10 0.66 0.25
 1 -7 -10 0.38 0.67
 1 7 -10 1.13 0.75
 -1 7 9 8.59 2.66
 1 7 -9 11.03 3.06
 1 -7 -9 5.53 4.46
 1 7 -9 11.61 3.17
 1 -7 -9 12.93 3.43
 1 7 -8 683.58 28.51
 -1 7 8 608.06 34.73
 1 7 -8 603.98 27.33
 1 -7 -8 697.88 28.57
 1 -7 -8 497.95 35.51
 -1 7 8 590.8 27.78
 1 7 -7 190.21 13.06
 1 -7 -7 235.07 15.88
 -1 7 7 128.72 18.3
 -1 -7 7 348.4 22.43
 1 7 -7 217.01 13.8
 -1 7 7 274.36 17.76
 -1 7 6 19.93 3.78
 1 7 -6 24.13 3.99
 -1 -7 6 35.11 7
 1 -7 -6 29.99 3.76
 -1 -7 6 24.29 3.97
 -1 -7 5 520.88 23.19
 -1 -7 5 527.08 30.44
 -1 7 5 472.16 23.09
 1 7 -5 502.82 34.83
 1 -7 -5 632.33 20.29
 1 7 -5 583.07 23.74
 -1 -7 4 30.29 4.26
 1 -7 -4 37.39 3.12
 1 7 -4 50.13 5.37
 -1 -7 4 20.89 6.72
 -1 7 4 35.32 4.68
 1 7 -4 36.53 4.58
 -1 7 3 88.79 7.39
 1 -7 -3 86.56 4.83
 -1 -7 3 86.63 7.15
 1 7 -3 99.06 7.6
 -1 -7 2 104.61 7.81
 1 7 -2 126.49 5.86
 -1 7 2 110.23 8.04
 1 7 -2 124.77 8.45
 1 7 -1 11.93 1.44
 1 -7 -1 11.31 2.35
 -1 7 1 11.31 2.38
 -1 7 1 15.93 1.75
 1 7 -1 14.56 2.69
 -1 -7 1 12.95 2.51
 -1 7 0 260.19 13.07
 1 -7 0 247.5 13.04
 -1 7 0 272.85 9.85
 1 7 0 261.58 13.52
 -1 -7 0 240.35 12.59
 -1 7 -1 37.75 4.4
 -1 -7 -1 38.69 2.4
 1 7 1 45.19 5.11
 -1 7 -1 42.61 3.21
 -1 -7 -1 40.04 4.41
 1 7 2 73.85 6.9
 -1 -7 -2 69.66 3.59
 -1 7 -2 75.65 6.56
 -1 -7 -2 73.77 6.21
 -1 7 -3 159.57 10.39
 -1 -7 -3 156.92 9.89
 1 7 3 148.81 10.69
 1 7 4 116.86 9.75
 -1 7 -4 127.76 9.42
 -1 -7 -4 124.47 9.02
 -1 7 -4 124.27 9.96
 -1 -7 -5 206.89 12.74
 -1 7 -5 219.08 13.46
 -1 7 -5 211.38 13.86
 1 7 5 219.58 14.99
 -1 7 -6 4.65 1.94
 1 7 6 3.64 1.8
 -1 -7 -6 5.5 2.09
 -1 7 -6 3.18 1.32
 -1 -7 -7 196.7 13.6
 -1 7 -7 203.22 14.08
 1 7 7 186.2 14.35
 -1 7 -7 190.39 14.12
 1 7 8 3.48 2.03
 -1 7 -8 0.36 0.53
 -1 -7 -8 2.35 1.29
 1 7 9 14.93 3.84
 -1 7 -9 21.11 4.72
 -1 -7 -9 14.74 3.77
 -1 7 -9 16.34 4.01
 -1 -7 -9 25.34 5.9
 -1 7 -10 209.16 16.36
 -1 -7 -10 221.42 16.27
 -1 -7 -10 188.38 17.87
 -1 7 -11 23.46 6.05
 -1 -7 -11 24.41 5.3
 -1 -7 -11 20.77 7.05
 -1 7 -11 21.72 5.37
 -1 -7 -12 20.28 4.97
 -1 7 -12 12.52 4.1
 -1 -7 -12 14.17 6.86
 -1 7 -12 20.85 5.94
 -1 -7 -13 80.72 10.62
 -1 7 -13 69.75 9.92
 -1 7 -14 388.31 26.48
 -1 -7 -14 435.76 28.07
 -1 7 -15 14.99 5.13
 -1 -7 -15 18.2 5.25
 -1 -7 -16 93.19 12.95
 -1 -7 -16 96.02 13.49
 -1 7 -16 85.2 12.53
 -1 -7 -17 4.71 3.77
 -1 -7 -17 10.59 4.2
 -1 7 -17 8.57 4
 -1 -7 -18 116.88 16.05
 -1 7 -18 95.64 14.66
 -1 -7 -18 97.03 14.42
 -1 -7 -19 -1.28 3.35
 -1 -7 -19 0.47 1.52
 -1 7 -19 0.55 1.14
 -1 7 -20 29.02 8.4
 -1 -7 -20 30.49 8.38
 -1 -7 -20 27.75 8.07
 -1 -7 -21 5.67 3.92
 -1 7 -21 3.32 3.26
 -1 -7 -21 3.06 2.68
 -1 -7 -22 0.72 1.17
 1 -8 -22 112.05 16.56
 1 8 -22 100.58 15.76
 1 8 -21 10.03 4.79
 1 -8 -21 11.02 4.95
 1 -8 -20 18.01 6.16
 1 8 -20 18.37 6.5
 1 -8 -19 86.67 13.67
 1 8 -19 69.3 11.74
 1 -8 -18 26.98 7.41
 1 8 -18 19.46 5.95
 1 8 -17 39.65 8.19
 1 -8 -17 55.21 9.89
 1 8 -16 1.21 1.98
 1 -8 -16 0.02 0.53
 1 -8 -15 1.09 0.85
 1 8 -15 -0.11 1
 1 8 -14 70.59 9.73
 1 -8 -14 91.15 11.27
 1 8 -13 2 1.74
 1 -8 -13 1.66 1.76
 1 -8 -12 6.32 7.06
 1 -8 -12 15.87 4.29
 1 8 -12 15.05 4.2
 1 8 -11 8.14 3.29
 1 -8 -11 11.85 3.5
 1 8 -10 50.67 7.2
 1 -8 -10 68.36 8.26
 -1 8 10 50.41 7.54
 1 8 -9 107.35 10.29
 1 8 -9 128.07 11.18
 1 -8 -9 137.92 11.49
 -1 8 9 106.71 10.7
 1 -8 -9 100.88 14.15
 1 8 -8 295.25 17.49
 1 -8 -8 282.75 17.03
 -1 8 8 277.31 18.25
 1 -8 -8 314.62 19.74
 1 8 -8 244.56 16.5
 -1 8 7 554.26 27.32
 1 8 -7 490.12 24.57
 1 -8 -7 585.71 25.44
 -1 8 7 540.78 30.12
 1 -8 -7 656.89 23.64
 -1 -8 7 497.23 24.72
 1 8 -7 572.04 25.73
 1 -8 -6 8.96 1.77
 -1 8 6 6.79 2.22
 1 8 -6 12.77 6.75
 -1 -8 6 6.34 2.09
 1 -8 -6 3.67 1.37
 1 8 -6 6.74 2.21
 -1 8 6 7.18 4
 -1 8 5 44.61 5.84
 1 -8 -5 45.56 3.71
 -1 -8 5 39.84 5.38
 1 8 -5 48.24 5.81
 1 8 -5 50.08 7.18
 1 -8 -5 46.44 5.51
 -1 8 4 43.8 5.56
 -1 -8 4 65.19 7.76
 1 8 -4 62.26 5.1
 1 8 -4 49.89 5.78
 -1 -8 4 39.27 5.14
 1 -8 -4 43.6 3.38
 -1 -8 3 466.43 24.4
 -1 8 3 493.53 22.04
 -1 -8 3 441.92 20.92
 1 -8 -3 455.64 16.11
 1 8 -3 522.75 21.92
 1 8 -2 55.15 3.5
 1 8 -2 52.6 5.67
 -1 8 2 55.99 5.89
 -1 -8 2 45.96 5.22
 1 8 -1 17.03 3.12
 -1 8 1 15.33 2.05
 -1 -8 1 15.96 3.01
 -1 8 1 14.11 2.76
 -1 8 0 231.21 8.72
 1 8 0 225.33 13.06
 -1 8 0 220.09 12.48
 -1 -8 0 213.38 12.21
 -1 8 -1 508.97 15.44
 -1 8 -1 501.6 20.29
 -1 -8 -1 499.12 19.8
 1 8 1 521.68 21.62
 -1 -8 -2 23.93 1.73
 -1 8 -2 27.91 4.06
 -1 -8 -2 23.05 3.7
 1 8 2 24.11 4.17
 -1 -8 -3 43.8 2.79
 1 -8 3 36.43 5.1
 1 8 3 41.18 5.6
 -1 -8 -3 41.19 4.92
 -1 8 -3 51.53 5.81
 -1 8 -4 46.62 5.69
 -1 -8 -4 38.92 5.06
 1 8 4 37.98 5.62
 1 -8 4 38.32 5.4
 1 -8 5 8.01 2.6
 1 8 5 7.62 2.73
 -1 8 -5 7.67 2.46
 -1 -8 -5 7.26 2.18
 1 8 5 12.12 3.42
 -1 8 -5 6.67 2.27
 -1 8 -6 166.54 12.26
 -1 -8 -6 148.84 11.43
 -1 8 -6 158.9 12.77
 1 8 6 191.14 15.56
 1 8 7 14.84 4.06
 -1 -8 -7 24.98 5.21
 -1 8 -7 11.18 3.21
 -1 -8 -7 14.83 3.35
 -1 8 -7 13.46 3.36
 -1 -8 -8 15.22 4.59
 -1 8 -8 12.76 3.62
 -1 8 -8 6.6 2.21
 1 8 8 5.79 2.45
 -1 -8 -8 10.31 3.11
 -1 -8 -9 158.6 13.1
 -1 -8 -9 125.12 15.29
 -1 8 -9 157.27 13.67
 -1 -8 -10 8.96 2.95
 -1 8 -10 8.36 3.29
 -1 -8 -10 16.76 6.63
 -1 8 -10 10.03 4.25
 -1 8 -11 14.6 4.86
 -1 -8 -11 6.14 4.02
 -1 -8 -11 16.9 4.46
 -1 8 -11 16.45 5
 -1 -8 -12 168.74 15.37
 -1 8 -12 145.74 14.73
 -1 8 -13 97.39 12.33
 -1 -8 -13 113.96 12.98
 -1 -8 -14 112.08 13.46
 -1 8 -14 113.57 13.52
 -1 -8 -15 2.8 1.18
 -1 8 -15 1.38 1.76
 -1 -8 -16 30.53 7.29
 -1 8 -16 40.51 8.27
 -1 -8 -17 -0.66 2.35
 -1 8 -17 0.07 1.35
 -1 -8 -18 6.39 2.83
 -1 8 -18 7.54 4.09
 -1 -8 -19 -0.02 1.74
 -1 8 -19 4.76 3.89
 -1 8 -20 47.92 10.89
 -1 -8 -20 43.55 10.23
 -1 -8 -21 41.55 10.24
 -1 8 -21 25.1 8.03
 1 9 -22 77.9 13.76
 1 9 -21 9.37 4.42
 1 -9 -21 5.24 2.37
 1 -9 -20 14.79 6.33
 1 9 -20 2.94 2.89
 1 9 -19 168.93 18.6
 1 -9 -19 232.2 22.2
 1 9 -18 155.39 17.34
 1 -9 -18 185.28 19.27
 1 9 -17 27.1 6.69
 1 -9 -17 26.89 6.63
 1 -9 -16 16.08 4.96
 1 9 -16 12.26 4.11
 1 9 -15 11.86 4.23
 1 -9 -15 7.98 2.9
 1 9 -14 15.9 4.69
 1 -9 -14 16.26 4.26
 1 9 -13 27.91 6
 1 -9 -13 26.85 5.91
 1 -9 -13 10.45 6.62
 1 -9 -12 115.26 12.09
 1 9 -12 85.98 10.38
 1 -9 -12 75.4 18.42
 1 -9 -11 206 24.81
 1 9 -11 243.26 17.62
 1 -9 -10 77.52 9.05
 1 -9 -10 61.89 10.63
 1 9 -10 61.6 8.25
 1 9 -9 68.21 8.43
 1 -9 -9 79.94 8.81
 1 -9 -9 89.27 9.7
 -1 9 9 61.62 8.33
 1 9 -8 193.71 14.49
 1 -9 -8 214.77 14.7
 1 -9 -8 250.13 13.44
 -1 9 8 235.29 18.59
 1 9 -8 223.01 15.32
 1 9 -7 44.47 6.3
 1 -9 -7 59.25 5.03
 1 -9 -7 50.6 6.43
 -1 9 7 54.72 7.44
 -1 -9 7 41.02 5.94
 1 9 -7 38.9 12.33
 1 9 -7 51.32 6.65
 -1 9 6 26.45 5.25
 -1 9 6 10.38 2.85
 1 -9 -6 14.58 2.15
 1 -9 -6 18.07 3.69
 1 9 -6 18.77 3.77
 -1 -9 6 14.93 3.46
 1 9 -6 21.62 6.25
 1 -9 -5 11.13 2.69
 1 9 -5 15.28 3.37
 -1 9 5 11.06 2.88
 1 9 -5 14.99 2.86
 1 -9 -5 13.41 1.85
 -1 -9 5 10.21 2.83
 -1 9 5 8.68 3.22
 -1 9 4 23.81 4.35
 1 9 -4 25.42 4.22
 1 9 -4 33 3.33
 1 -9 -4 29.85 4.55
 1 -9 -4 22.58 2.25
 -1 -9 4 21.38 3.94
 -1 9 3 169.25 12.1
 1 9 -3 195.72 12.4
 1 9 -3 189.54 8.24
 1 -9 -3 182.19 11.77
 -1 -9 3 158.64 11.4
 -1 9 2 20.71 3.77
 1 9 -2 20.82 1.96
 1 9 -2 23.28 4
 1 -9 -2 17.17 3.34
 -1 -9 2 22.05 3.71
 1 -9 -1 442.18 19.58
 1 9 -1 464.73 20.22
 -1 -9 1 395.51 18.44
 -1 9 1 445.52 19.62
 -1 -9 0 8.94 2.31
 1 9 0 9.49 2.62
 1 -9 0 9.18 2.41
 -1 9 0 7.33 2.1
 -1 9 0 11.61 1.45
 1 9 1 34.73 5.12
 -1 9 -1 29.43 2.53
 1 -9 1 26.35 4.34
 -1 9 -1 27.62 4.21
 -1 -9 -1 26.33 4.05
 1 -9 2 2.73 1.49
 1 9 2 2.12 1.17
 -1 9 -2 2.28 0.71
 -1 -9 -2 0.6 0.69
 -1 9 -2 2 1.3
 1 -9 3 20.3 4.01
 -1 -9 -3 26.63 4.19
 1 9 3 22.21 4.31
 -1 -9 -3 27.68 3.41
 -1 9 -3 24.11 4.12
 -1 -9 -3 23.55 1.75
 1 9 4 63.3 7.64
 -1 -9 -4 69.29 6.79
 -1 -9 -4 58.99 3.63
 -1 9 -4 66.92 7.22
 -1 -9 -4 67.87 6.95
 1 -9 4 72.6 7.89
 -1 9 -5 12.32 3.36
 -1 9 -5 8.84 2.53
 1 9 5 11.35 3.19
 -1 -9 -5 12.37 3
 -1 -9 -5 10.38 3.28
 1 -9 5 10.57 3.07
 1 9 5 12.59 3.6
 1 -9 6 89.81 9.27
 -1 9 -6 91.39 9.68
 1 9 6 94.7 10.61
 -1 -9 -6 91.27 8.69
 -1 9 -6 92.42 9.13
 -1 -9 -6 68.09 9.76
 -1 -9 -7 9.44 4.2
 -1 9 -7 10.31 3.41
 -1 -9 -7 12.9 3.21
 -1 -9 -8 44.37 6.46
 -1 9 -8 46.4 7.14
 -1 9 -8 52.77 8.02
 -1 -9 -9 85.09 9.42
 -1 9 -9 87.61 10.18
 -1 9 -9 69.85 9.72
 -1 -9 -10 35.69 6.41
 -1 9 -10 26.4 6.69
 -1 9 -10 34.83 6.64
 -1 9 -11 265.13 19.77
 -1 -9 -11 297.97 20.18
 -1 9 -12 10.6 3.65
 -1 -9 -12 7.25 3.5
 -1 9 -13 123.3 14.02
 -1 -9 -13 133.53 14.14
 -1 -9 -14 3.47 2.66
 -1 9 -14 1.77 1.81
 -1 -9 -15 20.31 5.55
 -1 9 -15 20.01 5.72
 -1 -9 -16 10.19 4.18
 -1 9 -16 6.11 3.11
 -1 -9 -17 34.07 7.96
 -1 9 -17 37.7 8.8
 -1 -9 -18 1.02 2.04
 -1 9 -18 2.52 2.34
 -1 -9 -19 26.61 7.57
 -1 9 -19 22.64 6.91
 -1 -9 -20 0.66 1.13
 -1 9 -20 1.13 0.56
 1 10 -21 6.89 4.1
 1 -10 -21 8.95 4.81
 1 -10 -20 91.91 14.59
 1 10 -20 82.77 13.31
 1 -10 -19 22.78 6.7
 1 10 -19 16.98 5.67
 1 -10 -18 24.88 6.95
 1 10 -18 14.92 5.11
 1 10 -17 0.64 1.3
 1 -10 -17 0.89 2.19
 1 -10 -16 83.84 11.92
 1 10 -16 70.39 10.63
 1 10 -15 33.77 7.29
 1 -10 -15 48.42 8.62
 1 10 -14 19.62 5.21
 1 -10 -14 17.12 4.74
 1 -10 -13 227.63 18.1
 1 10 -13 174.36 15.93
 1 -10 -13 182.86 25.04
 1 -10 -12 372.78 30.3
 1 10 -12 334.72 22.71
 1 10 -11 3.57 2.03
 1 -10 -11 6.35 2.71
 1 -10 -11 1.24 1.45
 1 -10 -10 3.58 1.76
 1 -10 -10 4.11 2.24
 1 10 -10 6.49 3.08
 1 -10 -9 266.11 13.86
 1 -10 -9 275.87 17.45
 1 -10 -8 43.01 6.31
 1 -10 -8 46.44 4.69
 1 10 -8 33.05 5.69
 1 10 -8 25.16 10.54
 1 -10 -7 55.99 4.62
 1 10 -7 50.48 6.99
 -1 -10 7 44 6.57
 1 -10 -7 57.59 7.06
 1 10 -7 65.17 11.03
 1 -10 -6 67.08 7.46
 1 10 -6 74.5 7.8
 1 -10 -6 61.47 4.47
 -1 -10 6 55.99 7.15
 -1 -10 5 59.79 7.41
 1 -10 -5 67.32 4.28
 1 -10 -5 74.76 7.87
 -1 10 5 63.29 7.77
 1 10 -5 76.84 8.15
 1 10 -5 91.2 6.47
 1 10 -4 4.02 1.78
 1 -10 -4 4.03 1.64
 -1 -10 4 2.29 1.19
 -1 10 4 2.62 1.26
 1 10 -4 3.44 0.94
 -1 10 4 6.67 2.06
 1 -10 -3 113.89 9.57
 -1 10 3 103.68 9.54
 -1 -10 3 95.43 8.86
 1 10 -3 118.99 9.86
 1 10 -3 120.03 5.67
 1 10 -2 48.87 6.22
 -1 -10 2 47.17 6.01
 1 -10 -2 48.39 6
 -1 10 2 44.75 6.01
 1 10 -1 2.32 1.25
 -1 -10 1 1.92 0.94
 -1 10 1 1.86 1.41
 1 -10 -1 0.78 0.18
 -1 -10 0 3.49 1.48
 -1 10 0 2.07 1.43
 1 10 0 2.96 1.32
 1 -10 0 0.88 0.86
 -1 10 0 1.81 0.58
 -1 10 -1 46.61 3.09
 1 10 1 41.76 6.01
 -1 -10 -1 43.29 5.58
 -1 10 -1 48.16 5.95
 1 -10 1 40.12 5.85
 -1 -10 -2 358.94 18.55
 -1 10 -2 376.69 13.42
 1 -10 2 344.26 19.44
 1 10 2 348.22 19.93
 -1 10 -2 376 19.29
 1 10 3 33.87 5.75
 -1 10 -3 29.04 4.75
 -1 -10 -3 29.54 4.61
 1 -10 3 24.15 4.63
 -1 -10 -4 101.5 4.44
 -1 -10 -4 116.12 9.69
 -1 10 -4 112.93 9.96
 1 -10 4 108.53 10.21
 -1 10 -5 103.6 10.77
 1 -10 5 112.77 10.78
 -1 -10 -5 114.38 9.95
 1 -10 6 54.86 7.46
 -1 -10 -6 62.15 7.4
 -1 10 -6 59.91 8.08
 -1 10 -6 64.01 8.06
 -1 10 -7 123 12.3
 -1 10 -7 120.62 12.05
 -1 -10 -7 129.39 11.22
 -1 -10 -8 51.86 7.23
 -1 10 -8 60.49 8.5
 -1 10 -8 47.13 8.2
 -1 10 -9 17.15 5.7
 -1 10 -9 25.96 5.74
 -1 -10 -9 27.8 5.33
 -1 -10 -10 72.45 9.39
 -1 10 -10 79.56 10.45
 -1 10 -11 375.56 23.99
 -1 -10 -11 416.89 23.81
 -1 10 -12 95.23 12.18
 -1 -10 -12 114.51 12.73
 -1 10 -13 315.29 23.81
 -1 -10 -13 335.44 23.81
 -1 -10 -14 107.21 13.24
 -1 10 -14 79.31 11.69
 -1 -10 -15 5.7 3.45
 -1 10 -15 10.75 4.43
 -1 -10 -16 94.51 13.16
 -1 10 -16 79.08 12.19
 -1 -10 -17 5.5 3.46
 -1 10 -17 9.43 4.57
 -1 -10 -18 -3.94 2.76
 -1 10 -18 6.17 4.19
 -1 -10 -19 0.15 2.05
 -1 10 -19 -0.63 2.69
 1 11 -20 -0.06 3.24
 1 -11 -20 2.55 3.86
 1 11 -19 80.87 12.75
 1 -11 -19 108.48 15.19
 1 11 -18 -1.46 1.38
 1 -11 -18 1.47 1.63
 1 11 -17 4.14 3.01
 1 -11 -17 16.6 5.57
 1 -11 -16 -0.51 1.98
 1 11 -16 0.86 1.83
 1 -11 -15 54.15 9.27
 1 11 -15 37.27 7.62
 1 -11 -14 82.71 11.31
 1 11 -14 63.23 9.85
 1 -11 -13 89.39 11.14
 1 11 -13 62.58 9.56
 1 -11 -12 3.71 2.44
 1 -11 -12 0.17 2.1
 1 11 -12 1.63 0.88
 1 -11 -11 779.81 31.93
 1 -11 -11 796.16 36.17
 1 -11 -10 0.59 2.11
 1 11 -10 0 1.2
 1 -11 -10 0.89 1.07
 1 11 -9 3.92 2.02
 1 11 -9 1.19 4.17
 1 -11 -9 4.8 1.61
 1 -11 -9 9.21 3.28
 1 11 -8 26.42 5.34
 1 -11 -8 31.79 5.44
 1 -11 -8 26.21 3.25
 -1 -11 8 28.45 5.52
 1 11 -8 20.38 6.91
 1 -11 -7 39.45 3.64
 -1 -11 7 33 5.77
 1 11 -7 41.12 6.44
 1 -11 -7 35.23 5.71
 1 -11 -6 69.22 4.5
 1 -11 -6 75.68 8.29
 1 11 -6 89.37 6.93
 -1 -11 6 61.18 7.91
 1 -11 -5 22.72 4.34
 1 11 -5 28.54 3.18
 -1 -11 5 21.68 4.53
 1 11 -4 42.64 3.43
 1 -11 -4 39.21 5.73
 -1 -11 4 33.03 5.52
 1 -11 -3 48.13 6.41
 1 11 -3 46.18 3.05
 -1 -11 3 41.12 6.09
 1 -11 -2 13.41 3.3
 -1 -11 2 10.05 2.86
 -1 -11 1 56.92 6.83
 1 -11 -1 73.5 7.95
 -1 -11 0 12.94 2.96
 1 -11 0 12.3 3.24
 -1 -11 -1 105.99 9.52
 1 -11 1 111.42 10.31
 -1 11 -1 125.25 7.19
 -1 11 -1 125.31 5.42
 1 -11 2 264.18 17.34
 -1 11 -2 292.55 14.03
 -1 -11 -2 262.66 16.17
 -1 11 -2 294.63 10.79
 -1 11 -3 261.85 14.45
 -1 11 -3 262.47 10.96
 -1 -11 -3 258.43 15.85
 1 -11 3 246.98 16.93
 -1 11 -4 231.92 14.97
 1 -11 4 227.7 16.28
 -1 -11 -4 242.34 15.35
 -1 11 -5 23.68 5.16
 1 -11 5 24.7 4.92
 -1 -11 -5 19.55 1.62
 -1 11 -5 22.23 5.05
 -1 -11 -5 26.29 4.82
 -1 11 -6 84.77 10.15
 -1 -11 -6 93.53 9.39
 1 -11 6 85.43 9.82
 -1 11 -6 70.41 9.9
 -1 -11 -7 30.59 5.33
 -1 11 -7 16.41 5.59
 -1 11 -7 26.63 5.73
 -1 -11 -8 45.41 6.92
 -1 11 -8 40.59 7.17
 -1 11 -8 24.49 7.8
 -1 11 -9 3.97 4.3
 -1 11 -9 0.02 1.38
 -1 -11 -9 -0.14 1.28
 -1 11 -10 115.82 12.91
 -1 -11 -10 132.81 12.7
 -1 11 -11 30.68 6.82
 -1 -11 -11 43.08 7.39
 -1 -11 -12 198.01 17.38
 -1 11 -12 184.53 17.68
 -1 -11 -13 -1.71 2.74
 -1 11 -13 3.48 2.55
 -1 -11 -14 67.33 10.52
 -1 11 -14 59.54 10.24
 -1 -11 -15 0.23 1.73
 -1 11 -15 3.4 2.84
 -1 -11 -16 -3.21 3.02
 -1 11 -16 -0.37 1.52
 -1 11 -17 3.51 3.02
 -1 -11 -17 7.14 3.49
 -1 -11 -18 0.54 0.91
 -1 11 -18 3.09 2.51
 -1 11 -19 15.17 5.65
 1 -12 -19 2.34 2.42
 1 12 -19 6.01 3.39
 1 12 -18 3.24 3
 1 -12 -18 3.05 2.29
 1 12 -17 0.11 0.76
 1 -12 -17 2.16 0.96
 1 12 -16 0.28 0.25
 1 -12 -16 -0.43 0.95
 1 -12 -15 39.92 8.13
 1 12 -15 28.56 6.94
 1 -12 -14 116.43 13.34
 1 12 -14 81.43 11.42
 1 12 -13 11.55 3.84
 1 -12 -13 9.09 3.4
 1 -12 -12 225.78 17.95
 1 12 -12 171.34 16.25
 1 12 -11 5.91 6.98
 1 -12 -11 3.17 2.25
 1 12 -11 0.95 1.51
 1 12 -10 204.68 26.03
 1 -12 -10 249.62 12.81
 1 12 -10 212.97 17.9
 1 -12 -9 248.24 11.96
 1 12 -9 229.87 17.8
 1 12 -9 266.7 23.92
 1 -12 -9 279.04 18.7
 1 -12 -8 33.87 6.01
 1 12 -8 34.92 5.78
 1 -12 -8 29.6 3.22
 -1 -12 8 35.68 6.57
 1 12 -8 26.28 5.49
 1 -12 -7 19.64 4.3
 1 -12 -7 13.5 1.86
 1 12 -7 20.08 3.6
 -1 -12 7 10.67 3.59
 -1 -12 6 57.38 7.99
 1 12 -6 78.85 5.93
 1 -12 -6 67.96 8.36
 1 -12 -5 64.18 7.82
 1 12 -5 60.32 4.53
 -1 -12 5 51.01 7.3
 1 12 -4 10.74 1.51
 1 -12 -4 12.57 3.34
 -1 -12 4 13.51 3.74
 -1 -12 3 19.78 4.4
 1 -12 -3 25.77 4.77
 1 -12 -2 128.77 11.28
 -1 -12 2 116.47 10.69
 1 -12 -1 26.55 4.99
 -1 -12 1 21.04 4.24
 1 -12 0 3.4 1.51
 -1 -12 0 2.74 1.2
 -1 -12 -1 218.51 14.83
 1 -12 1 213.07 15.48
 1 -12 2 35.96 6.05
 -1 -12 -2 41.37 6.03
 -1 12 -3 76.75 4.61
 1 -12 3 61.02 8.31
 -1 -12 -3 64.7 7.77
 -1 12 -4 422.46 16.16
 -1 -12 -4 407.71 21.93
 1 -12 4 385.92 23.19
 1 -12 5 44.81 7.36
 -1 -12 -5 65.18 8.03
 -1 12 -6 691.17 31.99
 -1 -12 -6 724.67 29.53
 1 -12 6 682.72 31.13
 -1 -12 -7 115.26 6.02
 -1 12 -7 123.99 12.99
 -1 -12 -7 132.94 11.95
 1 -12 7 126.14 12.8
 -1 -12 -8 75.43 9.11
 -1 12 -8 67.07 9.68
 -1 12 -9 5.04 2.26
 -1 -12 -9 11.12 3.65
 -1 12 -10 2.22 0.35
 -1 -12 -10 6.31 2.74
 -1 -12 -11 0.38 0.65
 -1 12 -11 1.38 1.74
 -1 -12 -12 4.56 2.73
 -1 12 -12 4.14 2.99
 -1 12 -13 16.04 5.14
 -1 -12 -13 15.95 4.81
 -1 -12 -14 78.49 11.42
 -1 12 -14 63.79 10.94
 -1 12 -15 11.75 4.96
 -1 -12 -15 6.12 3.21
 -1 -12 -16 13.14 4.92
 -1 12 -16 14.55 5.54
 -1 -12 -17 22.08 6.84
 -1 12 -17 15.92 5.76
 -1 12 -18 6.82 3.85
 1 13 -18 8.67 4.17
 1 -13 -17 2.26 2.79
 1 13 -17 -0.53 1.41
 1 -13 -16 10.66 4.75
 1 13 -16 4.88 2.82
 1 13 -15 24.96 6.59
 1 -13 -15 29.29 6.73
 1 13 -14 27.68 6.69
 1 -13 -14 33.56 7.15
 1 13 -13 19.7 5.48
 1 -13 -13 34.08 7.03
 1 -13 -12 92.9 11.45
 1 13 -12 68.69 10.12
 1 13 -11 68.57 10.03
 1 -13 -11 83.81 10.6
 1 -13 -10 174.61 15.17
 1 13 -10 130.77 13.91
 1 13 -9 217.74 15.4
 1 -13 -9 190.17 15.81
 1 -13 -8 120.47 12.11
 1 13 -8 93.31 11.12
 -1 -13 8 94.87 11.02
 1 13 -8 129.35 9.42
 -1 -13 7 43.37 7.11
 1 13 -7 51.18 5
 1 -13 -7 49.22 7.44
 1 -13 -6 21.56 4.88
 -1 -13 6 14.73 4.24
 1 13 -6 17.18 2.44
 -1 -13 5 41.39 6.86
 1 -13 -5 47.48 7.17
 1 13 -5 49.22 3.65
 -1 -13 4 33.05 6.01
 1 -13 -4 37.17 6.23
 -1 -13 3 96.47 10.45
 1 -13 -3 113.35 11.07
 -1 -13 2 20.59 4.64
 1 -13 -2 17.18 4.17
 1 -13 -1 4.7 2.02
 -1 -13 1 3.64 1.56
 1 -13 0 78.58 9.28
 -1 -13 0 77.72 8.85
 -1 -13 -1 2.21 1.48
 1 -13 1 1.68 0.47
 1 -13 2 -0.4 1.21
 -1 -13 -2 0.01 0.17
 -1 -13 -3 5.31 2
 -1 13 -3 9.9 1.27
 1 -13 3 9.6 2.89
 1 -13 4 -1.07 1.3
 -1 13 -4 1.41 0.64
 -1 -13 -4 1.26 1
 -1 -13 -5 415.18 23.61
 -1 13 -5 465.63 17.87
 1 -13 5 408.94 25.13
 -1 -13 -6 99.77 10.51
 1 -13 6 101.76 11.48
 -1 13 -6 91.73 11.42
 1 -13 7 2.48 1.78
 -1 13 -7 0.63 0.2
 -1 -13 -8 33.51 6.19
 -1 13 -8 28.44 6.44
 -1 -13 -8 25.87 2.45
 -1 13 -9 47.7 8.51
 -1 -13 -9 57.34 8.55
 -1 13 -10 2.4 2.05
 -1 -13 -10 4.7 2.98
 -1 -13 -11 34.44 6.96
 -1 13 -11 32.57 7.51
 -1 -13 -12 79.38 10.76
 -1 13 -12 77.05 11.52
 -1 13 -13 3.12 3.03
 -1 -13 -13 3.58 2.95
 -1 -13 -14 15.34 5.48
 -1 13 -14 10.17 4.42
 -1 13 -15 1.9 1.95
 -1 -13 -15 1.27 2.95
 -1 -13 -16 39.18 8.82
 -1 13 -16 30.09 8.03
 1 -14 -16 1.53 1.67
 1 14 -16 1.63 1.22
 1 14 -15 4.1 2.33
 1 -14 -15 6.21 3.42
 1 -14 -14 5.15 2.52
 1 14 -14 1.38 0.96
 1 14 -13 1.05 1.7
 1 -14 -13 1.22 1.63
 1 14 -12 41.23 8.2
 1 -14 -12 42.54 7.86
 1 -14 -11 13.6 4.39
 1 14 -11 10.25 4.1
 1 -14 -10 1.37 1.77
 1 14 -10 0.41 1.27
 1 -14 -9 19.32 5.16
 1 14 -9 19.42 5.25
 1 -14 -8 3.04 1.59
 1 14 -8 4.77 3.1
 -1 -14 8 1.11 0.81
 -1 -14 7 227.17 18.16
 1 -14 -7 270.06 19.1
 -1 -14 6 1.23 0.7
 1 -14 -6 2.61 2.26
 -1 -14 5 21.64 5.04
 1 -14 -5 19.76 4.83
 1 -14 -4 18.71 4.53
 -1 -14 4 22.58 5.24
 -1 -14 3 28.2 5.75
 1 -14 -3 29.46 5.68
 1 -14 -2 1.62 0.43
 -1 -14 2 0.54 1.37
 1 -14 -1 155.58 13.82
 -1 -14 1 130.14 12.42
 -1 -14 0 94.58 10.37
 1 -14 0 99.17 11.04
 1 -14 1 7.62 2.87
 -1 -14 -1 9.71 3.07
 1 -14 2 32.61 6.44
 -1 -14 -2 34.78 6.08
 1 -14 3 15.87 4.56
 -1 -14 -3 14.27 3.81
 1 -14 4 46.48 7.86
 -1 -14 -4 39.44 6.67
 -1 14 -5 3.97 1.06
 -1 -14 -5 4.48 2.55
 1 -14 5 3.03 2.4
 1 -14 6 4.43 2.54
 -1 14 -6 4.94 2.06
 -1 -14 -6 5.25 2.9
 -1 -14 -7 51.22 7.77
 1 -14 7 58.03 9.11
 -1 14 -7 42.8 8.17
 -1 -14 -8 8.22 3.11
 -1 14 -8 10.04 4
 -1 -14 -9 0.74 1.51
 -1 14 -9 0.92 2.01
 -1 -14 -10 18.64 4.81
 -1 14 -10 17.56 5.19
 -1 14 -11 48.97 9.33
 -1 -14 -11 43.84 8.09
 -1 -14 -12 -0.44 1.1
 -1 14 -12 6.16 3.6
 -1 -14 -13 1.63 2.05
 -1 14 -13 1.8 0.23
 -1 14 -14 8.08 3.83
 -1 -14 -14 2.92 1.83
 -1 14 -15 4.65 3.82
 -1 -14 -15 8.21 3.62
 1 -15 -15 7.65 4.21
 1 -15 -14 1.7 2.71
 1 15 -14 0.28 1.17
 1 15 -13 8.6 3.83
 1 -15 -13 6.52 3.44
 1 -15 -12 3.05 2.15
 1 15 -12 3.38 2.39
 1 -15 -11 1.5 1.86
 1 15 -11 2.65 2.46
 1 -15 -10 4.61 2.65
 1 15 -10 2.76 1.36
 1 -15 -9 36.35 7.16
 1 15 -9 26.93 6.46
 1 15 -8 6.08 3.02
 1 -15 -8 7.78 3.31
 -1 -15 8 5 2.62
 1 -15 -7 31.7 6.68
 -1 -15 7 24.74 5.91
 -1 -15 6 189.83 16.96
 1 -15 -6 224.42 17.84
 -1 -15 5 23 5.47
 1 -15 -5 23.75 5.52
 -1 -15 4 130.73 13.53
 1 -15 -4 138.69 13.6
 1 -15 -3 70.04 9.36
 -1 -15 3 63.18 9.05
 -1 -15 2 18.17 4.67
 1 -15 -2 22.19 4.98
 1 -15 -1 86.92 10.81
 -1 -15 1 72.24 9.5
 1 -15 0 68.65 9.62
 -1 -15 0 59.72 8.68
 -1 -15 -1 -0.24 1.23
 1 -15 1 1.05 1.73
 1 -15 2 31.18 6.46
 -1 -15 -2 28.94 5.76
 1 -15 3 89.24 11.3
 -1 -15 -3 85.12 10.21
 1 -15 4 8.89 3.25
 -1 -15 -4 6.85 3.17
 1 -15 5 0.61 1.48
 -1 15 -5 0.81 1.51
 -1 -15 -5 2.33 2.08
 1 -15 6 2.6 1.81
 -1 -15 -6 2.08 1.97
 -1 15 -6 4.76 2.57
 -1 15 -7 48.98 8.94
 -1 -15 -7 55.22 8.55
 1 -15 7 44.44 8.19
 -1 -15 -8 1.48 2
 -1 15 -8 1.61 2.02
 -1 -15 -9 1.68 1.38
 -1 15 -9 -0.46 0.29
 -1 -15 -10 10.18 3.92
 -1 15 -10 5.54 3.38
 -1 15 -11 3.36 3.84
 -1 -15 -11 1.46 1.88
 -1 15 -12 17.9 5.53
 -1 -15 -12 20.42 5.57
 -1 15 -13 112.94 15.34
 -1 -15 -13 149.71 16.1
 1 -16 -13 38.92 8.28
 1 16 -12 3.52 2.44
 1 -16 -12 5.98 2.94
 1 16 -11 49.07 9.16
 1 -16 -11 53.61 9.37
 1 16 -10 13.84 4.85
 1 -16 -10 27.6 6.65
 1 -16 -9 2.71 2.32
 1 16 -9 0.11 0.94
 -1 -16 8 85.7 11.57
 1 -16 -8 89.68 11.62
 1 16 -8 71.37 10.93
 -1 -16 7 62.44 9.77
 1 16 -7 65.15 10.24
 1 -16 -7 73.99 10.48
 -1 -16 6 100.81 12.45
 1 -16 -6 121.41 13.22
 -1 -16 5 85.52 11.36
 1 -16 -5 92.95 11.52
 1 -16 -4 1.31 1.76
 -1 -16 4 0.58 0.96
 -1 -16 3 16.69 4.87
 1 -16 -3 19.83 4.98
 -1 -16 2 35.72 7.09
 1 -16 -2 34.11 6.85
 1 -16 -1 30.59 6.67
 -1 -16 1 23.66 5.57
 -1 -16 0 1.49 1.05
 1 -16 0 1.22 2.2
 -1 -16 -1 12.17 3.91
 1 -16 1 16.38 5.03
 1 -16 2 8.53 3.63
 -1 -16 -2 6.69 2.53
 1 -16 3 32.45 7.03
 -1 -16 -3 35.96 6.89
 -1 -16 -4 46.28 7.79
 1 -16 4 43.59 8.21
 1 -16 5 59.65 9.81
 -1 16 -5 74.03 11.23
 -1 -16 -5 73.51 10.08
 1 -16 6 43.48 8.43
 -1 16 -6 48.83 9.25
 -1 -16 -6 47.96 8.3
 -1 -16 -7 23.37 5.73
 -1 16 -7 16.28 5.63
 1 -16 7 18.49 5.55
 -1 -16 -8 59.85 9.37
 -1 16 -8 54.07 9.82
 -1 -16 -9 1.5 1.58
 -1 16 -9 1.11 2.83
 -1 -16 -10 0.61 1.3
 -1 16 -10 -0.14 1.59
 -1 -16 -11 1.28 2.33
 -1 16 -11 0.59 0.95
 1 17 -10 1.77 2.27
 1 -17 -10 0.52 1.73
 1 -17 -9 20.62 5.77
 1 17 -9 16.35 5.25
 -1 -17 8 1.56 1.44
 1 17 -8 4.51 2.98
 1 -17 -8 -1.12 1.99
 -1 -17 7 7.85 3.59
 1 -17 -7 9.99 3.85
 1 17 -7 7.18 3.7
 1 -17 -6 2.11 2.25
 -1 -17 6 -0.02 1.16
 -1 -17 5 54.4 9.25
 1 -17 -5 61.76 9.82
 -1 -17 4 8.96 3.99
 1 -17 -4 8.01 3.56
 1 -17 -3 25.74 6.12
 -1 -17 3 16.8 4.98
 -1 -17 2 1.08 1.25
 1 -17 -2 1.15 1.8
 -1 -17 1 21.49 5.65
 1 -17 -1 17.78 5.32
 -1 -17 0 3.92 2.83
 1 -17 0 3.89 2.81
 1 -17 1 1.81 1.74
 -1 -17 -1 5.78 2.88
 -1 -17 -2 2.28 1.04
 1 -17 2 8.13 3.95
 -1 -17 -3 57.55 9.22
 1 -17 3 54.38 9.56
 1 -17 4 36.11 7.97
 -1 -17 -4 33.59 6.92
 1 -17 5 22.54 6.04
 -1 -17 -5 23.7 5.85
 -1 17 -5 26.31 6.82
 -1 17 -6 45.39 9.22
 1 -17 6 38.88 8.37
 -1 -17 -6 47.84 8.41
 1 -17 7 0.17 1.77
 -1 17 -7 1.62 2.28
 -1 -17 -7 2.87 2.11
 -1 17 -8 30.12 7.72
 -1 -17 -8 27.27 6.71
 -1 17 -9 42.03 9.18
 -1 -17 -9 44.66 8.6
 1 -18 -6 14.02 4.54
 -1 -18 6 19.95 5.72
 1 -18 -5 28.24 6.86
 -1 -18 5 23.14 6.36
 1 -18 -4 58.06 9.94
 -1 -18 4 62.18 10.29
 -1 -18 3 2.78 2.55
 1 -18 -3 1.33 0.73
 1 -18 -2 2.31 2.07
 -1 -18 2 0.62 2.23
 1 -18 -1 13.69 4.8
 -1 -18 1 19.33 5.73
 -1 -18 0 19.51 5.44
 1 -18 0 13.9 4.8
 1 -18 1 1.4 1.81
 -1 -18 -1 -1.01 1.5
 1 -18 2 28.79 7.36
 -1 -18 -2 18.75 5.25
 -1 -18 -3 2.83 2.96
 1 -18 3 1.3 1.42
 -1 -18 -4 12.21 4.61
 1 -18 4 13.68 5.39
 -1 18 -5 13.46 5.24
 1 -18 5 12.74 4.93
 -1 -18 -5 14.47 4.71
 -1 18 -6 7.42 4.05
 2 0 -25 0.03 2.57
 2 0 -24 2.85 2.55
 2 0 -23 4.42 3.67
 2 0 -22 17.52 6.07
 2 0 -21 -1.49 2.68
 2 0 -20 3.8 2.72
 2 0 -19 -0.01 2.59
 2 0 -18 17.78 5.27
 -2 0 17 13.76 8.22
 2 0 -17 1.24 1.39
 -2 0 16 116.49 17.13
 -2 0 16 88.32 10.06
 2 0 -16 104.57 12.64
 2 0 -15 -0.95 1.58
 -2 0 15 -0.79 1.91
 -2 0 14 34.03 5.7
 2 0 -14 37.22 6.7
 -2 0 13 -0.19 0.41
 -2 0 12 369.71 18.85
 2 0 -12 118.74 31.28
 -2 0 11 0.41 1.09
 2 0 -11 -0.53 3.04
 2 0 -11 -0.11 0.11
 2 0 -10 11.97 9.39
 2 0 -10 11.84 2.84
 -2 0 10 14.13 2.9
 -2 0 9 0.4 0.62
 2 0 -9 0.87 1.61
 2 0 -8 1545.02 49.73
 -2 0 8 1432.59 47.23
 -2 0 7 -0.57 0.92
 2 0 -7 1.3 0.71
 -2 0 6 162.92 8.25
 2 0 -6 175.04 9.1
 2 0 -5 -0.34 0.6
 -2 0 5 0.87 0.52
 2 0 -5 0.31 0.37
 -2 0 4 2993.89 80.87
 2 0 -4 2860.37 81.29
 2 0 -4 3092.01 86.54
 2 0 -3 1.02 0.67
 2 0 -2 47.04 4.33
 2 0 -1 0.26 0.24
 2 0 0 120.07 5.42
 -2 0 0 115.16 5.35
 -2 0 -1 0.01 0.15
 2 0 1 0.27 0.22
 2 0 2 80.73 5.61
 -2 0 -2 80.8 5.84
 -2 0 -3 0.38 0.58
 2 0 3 0.11 0.44
 -2 0 -4 6.61 1.94
 2 0 4 5.2 1.57
 2 0 5 0.06 0.47
 -2 0 -5 0.45 0.24
 -2 0 -6 19.4 3.92
 2 0 6 19.54 3.62
 2 0 7 0.35 0.45
 -2 0 -7 -0.2 1.31
 2 0 8 12.95 3.18
 -2 0 -8 17.2 4.22
 2 0 9 0.23 0.46
 -2 0 -9 1.1 1.15
 -2 0 -10 347.32 22.42
 2 0 10 307.76 18.9
 2 0 11 -0.16 0.39
 -2 0 -11 -0.77 0.52
 -2 0 -12 1.85 1.32
 2 0 12 0.01 1.32
 -2 0 -13 0.35 1.16
 -2 0 -14 4.68 2.02
 -2 0 -15 -2.33 3.07
 -2 0 -16 193.05 20.39
 -2 0 -17 1.76 2.54
 -2 0 -18 45.89 10.3
 -2 0 -19 0.86 2.16
 -2 0 -20 24.4 7.64
 -2 0 -21 2.49 2.98
 -2 0 -22 15.31 6.38
 2 -1 -25 -0.54 2.6
 2 1 -25 -1.39 2.67
 2 1 -24 0.75 1.06
 2 -1 -24 0.46 0.69
 2 -1 -23 24.35 7.76
 2 1 -23 27.55 7.69
 2 -1 -22 -0.53 1.24
 2 1 -22 1.64 2.19
 2 1 -21 13.14 5.27
 2 -1 -21 11.19 4.87
 2 -1 -20 5.99 3.71
 2 1 -20 8.93 4.36
 2 -1 -19 40.42 8.4
 2 1 -19 39.95 8.47
 2 -1 -18 13.43 4.47
 2 1 -18 15.7 5.4
 2 -1 -17 49.46 8.84
 -2 1 17 67.1 13.88
 2 1 -17 47.29 8.76
 -2 -1 17 60.83 12.18
 -2 1 16 4.13 2.25
 2 1 -16 3.77 1.89
 2 -1 -16 4.69 2.28
 -2 -1 16 10.98 5.73
 -2 1 16 13.03 6.41
 -2 1 15 101.93 10.41
 -2 1 15 94.87 17.17
 2 1 -15 133.94 13.82
 2 -1 -15 123.72 12.99
 -2 -1 15 100.82 16.53
 -2 -1 15 115 11.18
 -2 -1 14 60.95 19.36
 -2 1 14 55.49 15.4
 -2 -1 13 1.83 1.53
 -2 1 13 1.55 1.23
 -2 -1 12 92.85 8.8
 -2 1 12 87.96 8.39
 -2 1 11 129.12 10
 -2 -1 11 155.45 11.21
 2 -1 -11 151.37 11.94
 2 1 -11 147.24 11.87
 2 -1 -10 1359.43 46.3
 -2 -1 10 1274.95 44.05
 2 -1 -10 1064.96 74.41
 2 1 -10 932.34 75.98
 -2 1 10 1227.58 43.21
 2 1 -10 1355.37 46.39
 -2 1 9 620.82 25.06
 2 -1 -9 647.82 44.88
 2 1 -9 680.52 27.18
 2 1 -9 631.02 48.05
 2 -1 -9 663.62 27.01
 -2 -1 9 672.66 26.09
 -2 -1 8 2540.52 75.8
 -2 1 8 2320.83 74.74
 2 -1 -8 2561.14 76.92
 2 1 -8 3039.85 103.96
 2 -1 -8 3021.18 95.78
 2 1 -8 2540.26 76.91
 2 -1 -7 2089.99 62.62
 2 1 -7 1656.18 51.64
 -2 -1 7 1639.07 50.85
 -2 1 7 1453.46 49.65
 2 -1 -7 1635.63 51.05
 2 1 -7 1994.27 64.06
 2 -1 -6 1445.85 44.25
 2 1 -6 1499.94 45.93
 -2 1 6 1093.44 36.98
 2 1 -6 1149.3 37.9
 -2 -1 6 1193.37 37.69
 2 -1 -6 1256.59 38.23
 2 1 -5 9.19 1.54
 -2 1 5 9.62 1.52
 -2 1 5 4.12 2.7
 2 -1 -5 9.74 2.17
 2 -1 -5 8.11 1.39
 -2 1 4 661.4 20.62
 -2 1 4 631.91 26.31
 2 1 -4 725.83 25.64
 2 -1 -4 736.37 25.42
 2 1 -4 684.03 21.37
 2 1 -4 668.59 21.32
 2 -1 -4 734.22 21.83
 2 1 -3 264.64 8.8
 2 -1 -3 274.26 8.71
 2 -1 -3 288.11 12.78
 2 1 -3 249.21 9
 2 1 -3 284.69 12.76
 -2 1 3 259.58 11.93
 2 1 -2 228.49 10.99
 2 -1 -2 228.31 10.88
 -2 -1 2 205.69 9.89
 2 -1 -1 163.4 8.94
 -2 -1 1 167.91 8.6
 2 1 -1 170.55 9.01
 2 1 -1 187.23 7.25
 -2 -1 0 201.08 7.25
 -2 1 0 222.57 8.46
 -2 1 0 194.8 7.24
 -2 -1 0 199.49 9.68
 2 -1 0 208.43 7.85
 2 1 0 216.51 8.95
 2 -1 1 6.73 1.24
 2 1 1 8.15 1.65
 -2 -1 -1 5.5 1.37
 -2 1 -1 7.35 1.45
 -2 -1 -1 9.04 1.84
 -2 -1 -2 369.87 15.14
 -2 1 -2 393.36 15.56
 2 1 2 370.83 15.77
 2 -1 2 358.93 14.46
 -2 -1 -3 887.97 31.11
 2 -1 3 908.26 30.48
 -2 1 -3 941.01 31.74
 2 1 3 862.37 31.14
 -2 -1 -4 -0.2 1.04
 2 1 4 0.99 0.32
 -2 1 -4 0.86 1.14
 2 1 5 531.01 22.97
 -2 1 -5 582.03 24.31
 2 -1 5 515.9 22.17
 -2 -1 -5 545.36 23.48
 -2 1 -6 54.42 6.72
 -2 -1 -6 61.05 6.87
 2 -1 6 56.1 6.11
 2 1 6 54.2 6.24
 2 -1 7 313.76 17.19
 -2 -1 -7 349.92 19.53
 -2 1 -7 367.81 19.89
 2 1 7 311.98 17.74
 2 -1 8 32.22 5.02
 -2 -1 -8 39.52 6.29
 2 1 8 35.96 5.56
 -2 1 -8 33.01 5.74
 -2 1 -9 137.15 12.62
 2 -1 9 118.63 10.48
 -2 -1 -9 131.63 12.32
 2 1 9 117.6 10.92
 2 1 10 26.36 5.03
 2 -1 10 22.82 4.69
 -2 1 -10 27.95 5.74
 -2 -1 -10 19.17 4.77
 -2 1 -11 52.08 8.59
 2 -1 11 55.63 7.52
 -2 -1 -11 61.71 9.16
 2 1 11 54.18 7.63
 -2 -1 -12 161.18 15.59
 -2 1 -12 158.84 15.98
 2 -1 12 123.14 12.1
 -2 1 -13 155.02 16.5
 -2 -1 -13 155.31 16
 -2 1 -14 148.85 16.75
 -2 -1 -14 134.12 15.5
 -2 -1 -15 51.01 9.72
 -2 1 -15 65.96 11.4
 -2 1 -16 74.62 12.56
 -2 -1 -16 83.62 12.77
 -2 -1 -17 0.28 1.6
 -2 1 -17 5.35 4.31
 -2 1 -18 288.91 27
 -2 -1 -18 285.56 26.38
 -2 -1 -19 140.09 18.67
 -2 1 -19 165.35 20.62
 -2 -1 -20 126.86 18.14
 -2 1 -20 142.01 19.63
 -2 1 -21 21.05 8.45
 -2 -1 -21 28.87 8.77
 -2 -1 -22 124.57 19.04
 -2 1 -22 160.4 21.88
 2 -2 -25 29.13 8.89
 2 2 -25 29.6 9.02
 2 2 -24 5.97 4.16
 2 -2 -24 14.79 6.74
 2 -2 -23 1.88 1.89
 2 2 -23 0.01 1.36
 2 2 -22 68.15 12.63
 2 -2 -22 74.66 12.96
 2 -2 -21 6.25 4.38
 2 2 -21 8.11 3.9
 2 -2 -20 0.53 1.36
 2 2 -20 2.75 3.31
 2 -2 -19 284 23.84
 2 2 -19 239.48 22.46
 2 2 -18 67.68 10.91
 2 -2 -18 71.25 11.1
 2 -2 -17 0.65 1.32
 2 2 -17 1.51 1.26
 -2 -2 17 3.9 4.16
 2 -2 -16 22.98 5.7
 -2 2 16 34.81 10.16
 2 2 -16 25.65 6.06
 -2 -2 16 41.97 10.62
 2 -2 -15 4.42 2.17
 -2 -2 15 1.5 0.76
 -2 2 15 3.49 1.56
 2 2 -15 1.65 1.58
 -2 -2 14 96.48 20.27
 -2 2 14 79.14 18.24
 -2 2 14 7.37 2.62
 2 -2 -14 8.47 2.82
 -2 -2 14 8.36 2.86
 2 2 -14 12.08 3.87
 -2 -2 13 16.45 3.92
 -2 2 13 16.18 3.75
 2 2 -13 16.75 4.17
 -2 -2 13 10.6 9.18
 -2 -2 12 53.53 6.81
 -2 2 12 50.23 6.38
 2 2 -12 28.11 15.57
 2 -2 -12 42.64 17.45
 2 -2 -11 -0.26 0.58
 -2 -2 11 0.39 1.02
 -2 2 11 0.55 0.67
 2 -2 -10 62.67 15.21
 -2 -2 10 58.17 6.47
 2 -2 -10 53.76 6.5
 2 2 -10 51.76 6.3
 -2 2 10 48.27 5.7
 2 2 -10 50.94 16.4
 2 2 -9 311.35 16.27
 2 -2 -9 343.6 17.2
 2 2 -9 297.24 32.04
 2 -2 -9 359.2 29.43
 -2 -2 9 327.4 16.29
 -2 2 9 298.54 15.56
 2 -2 -8 89.9 11.01
 2 2 -8 64.79 6.04
 2 2 -8 80.88 13.22
 -2 -2 8 60.28 5.86
 -2 2 8 61.06 5.7
 2 -2 -8 66.61 6.22
 2 2 -7 887.31 33.07
 2 2 -7 1312.03 48.31
 2 -2 -7 1218.76 41.87
 -2 2 7 834.95 32.62
 2 -2 -7 1333.61 38.49
 2 2 -6 229.76 13.76
 2 2 -6 159.82 8.74
 2 -2 -6 204.31 11.98
 2 2 -6 158.49 8.82
 -2 2 6 150.74 8.54
 2 -2 -6 175.2 8.76
 2 -2 -5 81.22 6.61
 2 -2 -5 77.31 5.14
 2 2 -5 90.12 7.35
 2 2 -5 65.95 4.75
 -2 2 5 69.39 4.83
 2 2 -5 74.07 5.06
 2 -2 -4 29.5 2.57
 2 -2 -4 24.84 3.25
 2 2 -4 32.26 3.87
 2 2 -4 26.65 2.52
 -2 2 4 26.12 3.97
 -2 -2 4 18.23 4.19
 2 2 -4 26.15 2.57
 -2 2 4 23.39 2.28
 -2 2 3 998.61 28.62
 -2 -2 3 872.88 31.2
 2 -2 -3 940.39 31.75
 2 2 -3 993.7 32.34
 -2 2 3 920.99 31.14
 2 -2 -3 956.06 27.95
 2 2 -3 957.79 28.24
 2 -2 -2 338.22 14.26
 -2 2 2 325.2 11.21
 2 2 -2 375.91 14.86
 2 2 -2 343.26 11.35
 -2 2 2 328.85 13.63
 -2 -2 2 325.69 11.38
 -2 -2 2 325.82 13.46
 2 -2 -2 348.54 11.25
 2 2 -1 54.53 4.61
 2 -2 -1 51.44 4.55
 -2 2 1 51.15 4.37
 -2 -2 1 50.61 4.21
 -2 2 1 58.38 3.54
 -2 2 1 51.11 2.83
 -2 -2 1 48.45 2.9
 2 -2 -1 54.44 3.32
 2 2 -1 58.22 3.48
 -2 2 0 318.68 11.42
 -2 -2 0 320.79 13.52
 -2 -2 0 318.61 11.36
 -2 2 0 328.77 13.91
 -2 -2 -1 185.08 8.27
 -2 2 -1 189.81 10.01
 -2 2 -1 222.68 9.71
 -2 -2 -1 183.37 9.48
 -2 2 -1 194.48 8.44
 2 -2 1 193.72 8.77
 2 2 1 212.67 10.22
 -2 -2 -2 116.54 7.22
 -2 2 -2 108.57 6.48
 2 -2 2 115.81 6.88
 -2 -2 -2 111.76 6.65
 -2 2 -2 125.16 7.49
 2 2 2 112.76 7.57
 2 -2 3 320.56 14.49
 2 2 3 315.6 15.55
 -2 2 -3 331.19 15.23
 -2 -2 -3 367.58 16.6
 2 2 4 1606 53.19
 2 -2 4 1555.74 50.99
 -2 2 -4 1723.55 53.12
 -2 -2 -4 1630.35 52.67
 -2 -2 -5 0.09 0.24
 -2 2 -5 -0.02 0.61
 2 -2 5 0.63 0.63
 2 2 5 0.54 0.64
 -2 2 -6 81.39 8.05
 2 -2 6 72.76 7.06
 2 2 6 79.34 8.05
 -2 -2 -6 77.28 7.96
 -2 2 -7 5.15 1.74
 2 -2 7 3.84 1.42
 -2 -2 -7 5.47 1.96
 2 2 7 4.16 1.67
 -2 -2 -8 10.62 2.85
 2 -2 8 10.65 2.86
 2 2 8 11.38 2.92
 -2 2 -8 10.99 3.2
 2 2 9 90.71 9.51
 2 -2 9 79.29 8.63
 -2 -2 -9 88.72 9.87
 -2 2 -9 100.65 10.73
 2 -2 10 181.22 13.8
 2 2 10 162.54 13.66
 -2 2 -10 195.73 15.96
 -2 -2 -10 177.52 15.1
 2 2 11 132.63 12.65
 -2 2 -11 140.89 14.16
 2 -2 11 133.25 12.14
 -2 -2 -11 137.44 13.62
 -2 -2 -12 25.41 5.98
 -2 2 -12 23.19 5.88
 -2 2 -13 81.12 11.6
 -2 -2 -13 78.62 11.06
 -2 -2 -14 8.6 3.85
 -2 2 -14 9.02 4.53
 -2 2 -15 639.32 39.29
 -2 -2 -15 602.94 36.51
 -2 -2 -16 42.52 9.22
 -2 2 -16 45.05 9.98
 -2 -2 -17 81.58 13.33
 -2 2 -17 102.47 15.37
 -2 -2 -18 211.91 22.53
 -2 2 -18 231.32 24.19
 -2 2 -19 87.58 15.09
 -2 -2 -19 84.87 14.22
 -2 -2 -20 7.39 4.11
 -2 2 -20 14.48 6.65
 -2 -2 -21 52.63 12.04
 -2 2 -21 40.95 11.2
 -2 -2 -22 1.63 3.02
 -2 2 -22 1.62 3.48
 2 -3 -25 4.74 4.21
 2 3 -25 0.54 1.99
 2 3 -24 28.31 8.8
 2 -3 -24 28.56 9
 2 -3 -23 0.31 1.79
 2 3 -23 2.75 2.72
 2 -3 -22 1.35 0.8
 2 3 -22 3.45 2.97
 2 -3 -21 32.11 8.35
 2 3 -21 34.87 8.92
 2 -3 -20 7.93 3.88
 2 3 -20 4.64 3.28
 2 -3 -19 24.3 6.59
 2 3 -19 27.03 7.41
 2 -3 -18 2.13 2.01
 2 3 -18 2.05 1.53
 2 -3 -17 14.54 4.88
 2 3 -17 12.09 4.66
 -2 3 17 27.68 9.28
 2 3 -16 233.82 19.42
 -2 3 16 223.55 24.67
 -2 -3 16 273.69 26.42
 2 -3 -16 267.36 20.76
 -2 3 15 417.47 35.54
 2 -3 -15 606.28 31.3
 -2 -3 15 462.18 36.08
 -2 -3 15 516.24 27.54
 -2 3 15 436.26 24.88
 2 3 -15 560.36 30.07
 2 3 -14 100.61 11.18
 -2 -3 14 105.42 10.86
 2 -3 -14 119.76 12.39
 -2 -3 14 122.09 19.42
 -2 3 14 82.11 19.08
 -2 3 14 86.95 9.43
 2 -3 -13 43.71 7.03
 -2 -3 13 42.15 6.37
 -2 -3 13 28.05 11.86
 -2 3 13 35.37 5.75
 2 3 -13 41.76 6.72
 2 -3 -12 3.41 6.72
 -2 -3 12 0.1 0.18
 -2 3 12 0.19 0.73
 2 3 -12 -0.99 3.06
 -2 -3 11 40.03 5.73
 2 -3 -11 44.2 14.11
 -2 3 11 37.01 5.36
 -2 -3 10 402.84 20.07
 2 3 -10 376.53 19.4
 -2 3 10 353.9 18.67
 2 -3 -10 411.98 35.69
 2 -3 -9 17.61 3.47
 2 3 -9 21.16 3.56
 2 3 -9 18.23 8.32
 2 -3 -9 17.4 5.53
 -2 3 9 15.62 3.07
 2 3 -9 20.56 3.62
 2 -3 -8 0.56 0.27
 2 3 -8 1.51 0.94
 -2 3 8 0.23 0.26
 2 3 -8 2.73 3.34
 2 3 -8 1.43 0.96
 2 -3 -7 99.38 7.68
 2 3 -7 103.9 7.56
 2 -3 -7 124.48 9.89
 -2 3 7 91.13 7.11
 2 3 -7 92.77 7.1
 2 3 -7 118.28 11.91
 2 3 -6 389.18 16.93
 2 3 -6 546.14 22.78
 2 -3 -6 518.3 20.64
 2 3 -6 442.8 17.8
 -2 3 6 372.37 16.79
 2 -3 -6 447.69 17.7
 2 3 -5 303.41 14.24
 2 -3 -5 268.95 12.73
 2 3 -5 228.6 10.71
 2 3 -5 207.06 10.46
 2 -3 -5 244.28 10.75
 -2 3 5 209.99 10.33
 2 3 -4 32.48 3.07
 -2 3 4 38.78 3.77
 2 -3 -4 31.45 2.92
 2 -3 -4 33.52 3.84
 -2 -3 4 22.36 5.61
 -2 3 4 28.04 4.11
 2 3 -4 35.81 4.04
 -2 3 3 305.21 12.41
 2 -3 -3 340.93 14.51
 2 3 -3 369.45 15.06
 2 3 -3 347.47 12.46
 -2 -3 3 302.26 12.35
 2 -3 -3 340.77 12.15
 -2 3 3 326.52 14.09
 -2 -3 3 314.72 14.55
 2 -3 -2 0.79 0.37
 -2 -3 2 0.72 0.36
 2 -3 -2 1.26 0.57
 -2 3 2 1.95 0.64
 2 3 -2 0.85 0.58
 -2 -3 2 1.35 0.63
 2 3 -2 -0.1 0.47
 -2 3 2 0.32 0.34
 2 -3 -1 47.55 3.53
 -2 3 1 43.14 3.04
 -2 3 1 40.51 3.89
 2 -3 -1 39.15 3.98
 2 3 -1 46.04 4.23
 -2 -3 1 40.48 3.69
 -2 -3 1 41.66 3.06
 2 3 -1 42.21 3.4
 2 3 0 154.61 7.85
 -2 3 0 153.92 8.3
 -2 -3 0 141.17 7.75
 -2 -3 0 143.37 6.72
 -2 3 0 142.84 6.79
 -2 3 0 169.87 8.28
 2 -3 0 158.06 7.8
 -2 -3 -1 159.55 7.79
 -2 3 -1 161.76 9.18
 -2 -3 -1 150.15 8.31
 -2 3 -1 163.11 7.96
 -2 -3 -2 100.67 6.35
 -2 -3 -2 97.55 6.65
 2 3 2 105.99 7.68
 -2 3 -2 113.8 7.56
 -2 3 -2 96 6.37
 -2 -3 -3 3436.07 99.61
 2 3 3 3334.94 101.76
 -2 3 -3 3462.33 99.71
 2 -3 3 3431.82 99.88
 -2 3 -3 3715.54 101.83
 2 -3 4 15.73 2.88
 -2 3 -4 15.04 3.09
 2 3 4 14.2 4.23
 -2 -3 -4 13.05 2.83
 -2 3 -4 13.38 2.6
 2 -3 5 1642.68 56.88
 -2 3 -5 1795.78 59.05
 2 3 5 1696.06 59.13
 2 -3 6 1814.28 60.9
 -2 3 -6 1975.27 63.52
 2 3 6 1816.45 63.11
 -2 -3 -6 1975.15 63.79
 2 -3 7 468.27 22.48
 -2 3 -7 483.8 24.01
 2 3 7 471.65 24.02
 -2 -3 -7 505.63 24.56
 2 -3 8 235.78 15.17
 2 3 8 239.07 16.74
 -2 3 -8 260.69 17.13
 -2 -3 -8 241.97 16.47
 2 -3 9 33.95 5.48
 2 3 9 27.17 5.21
 -2 -3 -9 37.19 6.36
 -2 3 -9 30.37 5.88
 2 -3 10 140.9 12.2
 2 3 10 145.92 12.98
 -2 -3 -10 149.19 13.95
 -2 3 -10 169.69 15.06
 2 3 11 88.59 10.34
 -2 -3 -11 106.05 12.05
 2 -3 11 102.22 10.64
 -2 3 -11 110.89 12.46
 -2 -3 -12 3.11 2.2
 -2 3 -12 3.03 2.66
 -2 -3 -13 3.99 2.08
 -2 3 -13 7.29 3.75
 -2 3 -14 238.06 21.27
 -2 -3 -14 244.19 21.48
 -2 -3 -15 1.73 2.43
 -2 3 -15 1.08 1.19
 -2 3 -16 350.5 27.92
 -2 -3 -16 334.5 27.39
 -2 -3 -17 26.45 7.25
 -2 3 -17 35.69 8.9
 -2 3 -18 230.88 24.22
 -2 -3 -18 194.02 21.64
 -2 -3 -19 15.74 5.79
 -2 3 -19 14.83 5.83
 -2 -3 -20 21.84 7.28
 -2 3 -20 19.8 7.48
 -2 -3 -21 6.33 4.41
 -2 3 -21 -2.05 4.25
 -2 -3 -22 0.96 0.89
 -2 3 -22 2.47 2.65
 2 -4 -25 7.83 5.71
 2 4 -25 -2.94 4.28
 2 -4 -24 9.86 5.46
 2 4 -24 9.91 5.34
 2 -4 -23 21.43 7.84
 2 4 -23 10.32 4.7
 2 4 -22 26.66 7.83
 2 -4 -22 44.1 11.45
 2 -4 -21 58.3 12.9
 2 4 -21 34.79 9.13
 2 -4 -20 8.21 5.2
 2 4 -20 3.61 2.55
 2 4 -19 74.79 11.83
 2 -4 -19 109.96 16.68
 2 4 -18 130.24 15.25
 2 -4 -18 159.52 18.21
 2 -4 -17 48.42 10.25
 2 4 -17 34.85 7.5
 -2 4 17 50.8 11.92
 -2 -4 16 10.4 6.44
 2 -4 -16 2.73 2.76
 2 4 -16 3.64 1.75
 2 4 -15 16.02 4.63
 2 -4 -15 26.21 6.88
 -2 4 15 12.87 3.98
 -2 4 15 30.1 9.91
 -2 -4 15 31.64 9.49
 2 4 -14 90.84 10.49
 -2 4 14 80.43 9.32
 -2 -4 14 80.43 14.59
 -2 -4 14 99.46 10.63
 -2 4 14 66.71 14.9
 -2 4 13 11.69 8.88
 2 -4 -13 6.76 2.74
 -2 4 13 6.07 2.58
 -2 -4 13 5.87 2.37
 2 4 -13 7.24 2.66
 2 4 -13 5 2.18
 -2 -4 12 13.75 8.06
 2 4 -12 22.11 4.53
 2 -4 -12 21.77 9.78
 -2 4 12 19.98 4.26
 2 4 -12 23.7 4.51
 2 4 -11 5.04 1.99
 -2 4 11 9.06 2.73
 2 4 -10 32.6 4.92
 2 -4 -10 30.91 7.92
 2 4 -10 24.39 11.16
 -2 4 10 27.54 4.71
 2 -4 -9 235.7 14.31
 2 4 -9 203.97 12.91
 2 4 -9 222.32 13.51
 -2 4 9 190.8 12.76
 2 4 -9 186.18 23.9
 2 -4 -8 234.27 15.29
 2 4 -8 153.25 10.33
 2 4 -8 166.64 10.91
 2 4 -8 211.33 20.47
 2 -4 -8 173.26 11.2
 -2 4 8 142.13 10.2
 -2 4 7 9.56 2.13
 2 4 -7 12.19 2.47
 2 -4 -7 12.47 2.65
 2 -4 -7 18.58 3.54
 2 4 -7 14.35 2.77
 2 -4 -6 247.6 12.18
 2 -4 -6 267.53 13.62
 2 4 -6 217.73 11.77
 2 4 -6 237.68 12.1
 -2 4 6 200.6 11.46
 2 4 -5 227.57 11.09
 -2 4 5 235.83 11.96
 2 -4 -5 235.53 12.06
 2 4 -5 203.14 10.82
 2 -4 -5 234.91 10.98
 2 -4 -4 904.04 27.32
 2 -4 -4 865.21 28.81
 2 4 -4 960.59 30.19
 -2 -4 4 765.02 27.37
 -2 4 4 783.92 31.44
 -2 4 4 794.09 27.73
 2 4 -4 867.32 27.5
 -2 4 3 72.1 5.22
 -2 -4 3 72.11 6.84
 -2 -4 3 75.93 5.39
 2 -4 -3 90.49 6.22
 2 4 -3 87.7 6.36
 2 -4 -3 85.14 5.3
 -2 4 3 84.36 6.03
 2 4 -3 83.61 5.41
 -2 -4 2 161.08 8.49
 -2 4 2 156.7 7.85
 2 -4 -2 163.6 8.81
 -2 -4 2 149.65 7.78
 2 4 -2 175.06 8.3
 -2 4 2 164.62 8.58
 2 -4 -2 169.65 8.13
 2 4 -2 173.62 9.19
 2 -4 -1 431.71 17.6
 2 4 -1 468.25 17.89
 2 -4 -1 474.14 17.1
 -2 4 1 467.39 17.58
 -2 -4 1 431.38 16.57
 -2 -4 1 450.16 16.25
 2 4 -1 497.36 17.44
 -2 4 1 448.41 16.17
 -2 -4 0 27.3 2.96
 2 4 0 29.29 3.34
 -2 4 0 30.1 2.95
 -2 -4 0 27.43 2.8
 -2 4 0 28.07 3.23
 2 -4 0 28.5 3.2
 2 4 1 286.91 13.25
 -2 4 -1 315.87 13.77
 -2 4 -1 269.94 11.72
 -2 4 -1 283.66 12.91
 -2 -4 -1 259.33 11.62
 2 -4 1 272.64 12.57
 -2 -4 -1 260.83 11.46
 -2 -4 -2 327.46 13.91
 -2 4 -2 303.68 13.81
 -2 4 -2 345.21 15.61
 -2 -4 -2 310.07 13.68
 2 4 3 5.43 1.82
 -2 4 -3 3.08 1.28
 -2 -4 -3 2.19 0.99
 -2 4 -4 62.64 6.5
 -2 -4 -4 52 5.31
 -2 4 -4 56.74 5.68
 2 4 4 49.5 6.07
 2 4 5 4.65 1.87
 -2 -4 -5 3.6 1.59
 -2 4 -5 5.28 1.91
 -2 4 -5 2.84 1.3
 2 -4 5 5.06 1.63
 -2 -4 -6 72.24 7.81
 -2 4 -6 67.12 7.05
 2 -4 6 70.26 7.22
 2 4 6 70.82 7.82
 -2 4 -6 79.74 8.19
 -2 4 -7 1212.9 43.92
 2 4 7 1127.01 45.29
 -2 -4 -7 1317.18 47.64
 -2 4 -7 1219.58 45.57
 2 -4 7 1152.62 43.65
 -2 -4 -8 12.47 3.82
 2 -4 8 2.03 1.38
 -2 4 -8 13.31 3.6
 2 4 8 2.68 1.39
 -2 4 -9 148.68 13.2
 2 -4 9 142.91 12
 2 4 9 127.87 12.38
 -2 -4 -9 154.91 13.99
 -2 4 -10 17.65 4.59
 -2 -4 -10 23.24 5.28
 2 4 10 18.48 4.54
 2 -4 10 24.81 4.9
 -2 -4 -11 0.17 1.32
 2 -4 11 1.16 1.46
 -2 4 -11 3.03 1.82
 -2 -4 -12 33.48 6.94
 -2 4 -12 29.79 6.55
 -2 4 -13 72.62 10.86
 -2 -4 -13 61.96 9.96
 -2 4 -14 57.5 10.23
 -2 -4 -14 57.16 9.77
 -2 -4 -15 6.08 2.84
 -2 4 -15 4.85 2.57
 -2 4 -16 68.44 11.77
 -2 -4 -16 71.05 11.69
 -2 -4 -17 0.68 1.41
 -2 4 -17 4.17 2.32
 -2 -4 -18 7.44 2.98
 -2 4 -18 6.8 3.57
 -2 4 -19 122.62 17.96
 -2 -4 -19 124.52 17.46
 -2 -4 -20 1.8 4.28
 -2 4 -20 7.03 4.61
 -2 -4 -21 54.71 12.15
 -2 4 -21 71.94 14.66
 -2 -4 -22 3.28 4.13
 -2 4 -22 4.14 4.76
 2 -5 -25 2.02 3.21
 2 -5 -24 6.75 3.91
 2 5 -24 -3.19 3.77
 2 -5 -23 5.92 3.89
 2 5 -23 4.56 2.56
 2 -5 -22 4.74 3.08
 2 5 -22 5.74 3.82
 2 -5 -21 14.9 5.61
 2 5 -21 8.55 4.19
 2 5 -20 1.6 2.33
 2 -5 -20 0.45 3.23
 2 -5 -19 14.25 5.06
 2 5 -19 17.09 5.54
 2 -5 -18 103.17 13.58
 2 5 -18 81.5 12.04
 2 -5 -17 536.96 31.74
 2 5 -17 449.84 29.53
 2 -5 -16 36.81 7.49
 2 5 -16 43.93 8.1
 2 -5 -15 1.75 1.62
 2 5 -15 1.87 2.06
 -2 5 15 15.44 7.8
 -2 -5 15 16.18 6.99
 -2 -5 14 83.44 14.22
 -2 5 14 64.91 8.52
 -2 5 14 82.44 16.6
 2 -5 -14 91.33 11.08
 2 5 -14 82.91 9.83
 2 5 -13 2.74 0.84
 2 5 -13 3.7 1.68
 2 5 -12 3.75 1.5
 2 5 -12 4.99 2.06
 2 -5 -12 7.15 5.9
 -2 -5 12 10.51 8.45
 -2 5 12 7.84 2.79
 2 -5 -12 8.09 2.58
 2 -5 -11 225 15.56
 2 -5 -11 238.15 23.87
 2 5 -11 220.41 14.79
 -2 5 11 180.65 13.73
 2 5 -11 204.05 14.23
 -2 5 10 1.16 0.74
 2 -5 -10 1.75 0.51
 2 5 -10 2.8 1.62
 -2 5 9 16.63 3.44
 2 -5 -9 24.36 4.93
 2 5 -9 21.12 3.97
 2 5 -9 22.43 8.54
 2 5 -8 22.76 4
 2 5 -8 32.72 7.36
 2 -5 -8 28.19 4.63
 -2 5 8 18.39 3.43
 2 -5 -8 21.44 3.57
 2 -5 -7 43.09 4.98
 2 5 -7 39.11 4.87
 2 -5 -7 51.3 5.72
 2 5 -7 38.04 4.75
 -2 5 7 37.93 4.84
 2 5 -7 55.37 7.56
 2 5 -6 1667.29 52.96
 2 -5 -6 1785.11 53.62
 2 -5 -6 1740.96 53.06
 -2 5 5 4.48 1.46
 2 5 -5 5.11 1.73
 -2 -5 5 3.44 1.31
 2 -5 -5 5.15 1.54
 -2 5 5 2.09 2.62
 2 -5 -5 3.17 1.03
 2 5 -5 4.37 1.21
 -2 -5 4 84.88 6.55
 -2 5 4 85.46 6.51
 2 -5 -4 99.8 6.81
 2 5 -4 111.26 7.47
 -2 5 4 85.76 8.87
 2 5 -4 100.53 6.75
 2 -5 -4 101.01 6.54
 -2 5 3 39.56 3.99
 -2 -5 3 36.9 3.92
 2 5 -3 43.01 4.31
 -2 5 3 43.1 4.27
 -2 -5 3 34.69 5.83
 2 5 -3 42.23 4.13
 2 -5 -3 41.13 4.05
 2 -5 -3 46.65 4.22
 -2 -5 2 1387.63 45.61
 2 -5 -2 1441.35 46.19
 2 5 -2 1649.9 47.18
 -2 5 2 1519.2 46.07
 2 5 -2 1554.33 46.69
 -2 -5 2 1500.95 46.47
 -2 5 2 1475.67 45.92
 2 -5 -2 1575.18 46.6
 2 5 -1 404.37 16.23
 -2 -5 1 355.6 14.48
 -2 5 1 390.24 15.21
 2 5 -1 399.04 15.8
 2 -5 -1 397.39 15.93
 -2 5 1 389.75 15.41
 -2 -5 1 369.39 14.97
 2 5 0 84.66 6.38
 -2 5 0 80.26 5.76
 -2 -5 0 78.37 5.21
 -2 -5 0 74.33 5.32
 2 -5 0 75.42 6.04
 -2 5 0 76.94 5.49
 2 -5 1 436.58 18.21
 2 5 1 429.62 18.36
 -2 5 -1 447.53 17.45
 -2 -5 -1 406.22 15.94
 -2 -5 -1 412.81 16.58
 -2 5 -1 418.17 16.89
 2 5 2 183.23 11.63
 -2 5 -2 180.7 9.93
 -2 -5 -2 176.98 9.62
 2 -5 2 184.79 10.72
 -2 -5 -2 169.27 8.93
 -2 5 -2 199.01 11.65
 2 5 2 179.49 11.17
 -2 -5 -3 18.53 2.96
 -2 5 -3 22.33 3.35
 -2 5 -3 23.34 3.84
 2 5 3 31.07 5.33
 -2 5 -4 100.16 8.68
 -2 -5 -4 84.73 7.18
 -2 5 -4 100.34 7.97
 2 5 4 88.3 8.45
 -2 -5 -5 539.17 23.32
 -2 5 -5 596.62 25.57
 2 5 5 509.84 25
 -2 5 -5 543.01 23.73
 -2 5 -6 615.89 27.35
 2 5 6 622.19 28.92
 -2 -5 -6 668.8 27.85
 -2 5 -7 54.48 6.79
 2 -5 7 51.37 6.56
 -2 -5 -7 50.94 6.54
 -2 5 -7 50.7 6.87
 2 5 7 52.88 7.13
 -2 -5 -8 617.2 29.01
 -2 5 -8 640.85 30.14
 -2 5 -8 605.14 28.19
 2 5 8 577.03 29.34
 2 -5 8 603.74 28
 -2 -5 -8 620 29.16
 -2 -5 -9 368.81 22.24
 2 -5 9 334.72 19.96
 -2 5 -9 345.18 21.59
 2 5 9 321.35 21.17
 -2 5 -9 361.6 20.58
 2 -5 10 0.22 0.59
 -2 5 -10 1.62 1.08
 -2 5 -10 1.59 1.35
 -2 -5 -10 1.74 1.39
 2 5 10 1.29 1.29
 -2 5 -11 80.97 10.61
 -2 -5 -11 85.91 11.87
 -2 -5 -12 3.67 3.55
 -2 5 -12 1.54 0.56
 -2 5 -13 49.92 8.93
 -2 -5 -13 71.67 12.12
 -2 -5 -14 14.35 5.33
 -2 5 -14 7.46 2.99
 -2 5 -15 159.92 17.8
 -2 -5 -15 168.19 19.25
 -2 -5 -16 -0.66 1.48
 -2 5 -16 -0.36 1.64
 -2 -5 -17 3.55 2.49
 -2 5 -17 16.76 6.25
 -2 -5 -18 23.71 12.33
 -2 5 -18 3.32 2.6
 -2 -5 -19 12.16 5.66
 -2 5 -19 10.58 5.27
 -2 -5 -20 4.5 3.01
 -2 5 -20 2.56 1.27
 -2 -5 -21 -3.46 3.81
 -2 5 -21 2.99 1.98
 2 6 -24 2.58 1.68
 2 -6 -23 -2.04 4.08
 2 6 -23 1.28 0.33
 2 -6 -22 13.36 5.44
 2 6 -22 13.23 5.33
 2 -6 -21 32.48 8.47
 2 6 -21 29.13 7.95
 2 -6 -20 18.56 5.77
 2 6 -20 15.18 5.77
 2 6 -19 28.77 6.97
 2 -6 -19 48.75 9.43
 2 -6 -18 31.2 7.33
 2 6 -18 28.37 6.89
 2 -6 -17 30.32 7.21
 2 6 -17 28.14 6.57
 2 -6 -16 96.88 12.51
 2 6 -16 77.88 10.65
 2 -6 -15 141.76 14.55
 2 6 -15 118.32 12.63
 -2 6 15 137.6 19.09
 -2 -6 15 178.06 20.8
 2 -6 -14 11.29 3.55
 2 6 -14 9.71 3.21
 -2 6 14 6.95 3.12
 -2 -6 14 18.06 7.27
 -2 6 13 14.9 8.33
 2 -6 -13 28.73 5.83
 -2 -6 13 29.67 8.69
 2 6 -13 22.12 4.75
 -2 6 13 17.72 4.43
 -2 -6 12 142.53 22.32
 -2 6 12 155.39 13.47
 2 6 -12 158.96 13.26
 2 -6 -12 192.94 14.9
 2 -6 -12 230.79 24.06
 2 6 -12 196.94 14.66
 2 6 -11 176.33 13.38
 2 -6 -11 210.01 14.89
 2 6 -11 170.45 28.65
 -2 6 11 171.56 13.52
 2 6 -11 205.07 14.51
 -2 6 10 16.39 3.67
 2 6 -10 23.47 4.43
 2 -6 -10 24.87 4.57
 2 6 -10 19.44 3.92
 2 -6 -10 27.98 5.84
 2 6 -10 32.08 11.02
 -2 6 9 13.8 3.17
 2 -6 -9 20.33 4.2
 2 6 -9 20.84 4.02
 2 6 -9 23.09 7.44
 2 6 -8 77.68 10.64
 2 6 -8 55.52 6.36
 2 -6 -8 67.97 6.96
 -2 6 8 50 6.14
 2 6 -7 148.85 10.32
 2 -6 -7 160.24 10.41
 -2 6 7 129.89 10.06
 -2 6 6 5.09 1.76
 -2 -6 6 6.64 1.95
 2 -6 -6 8.24 2.04
 2 6 -6 8.74 2.64
 2 -6 -6 8.74 2.2
 2 6 -6 5.23 1.57
 2 -6 -5 48.78 4.79
 -2 -6 5 34.58 4.45
 2 6 -5 46.52 4.95
 2 6 -5 57.14 5.65
 2 -6 -5 55.5 5.22
 -2 6 5 39.07 4.87
 -2 6 4 736.92 28.97
 2 -6 -4 845.32 28.54
 2 6 -4 949.81 30.03
 -2 6 4 612.23 33.08
 2 -6 -4 890.76 29.36
 2 6 -4 868.59 29.59
 -2 -6 4 743.23 28.87
 -2 -6 3 8.83 1.93
 -2 6 3 10.51 2.22
 2 6 -3 11.14 2.27
 2 -6 -3 12.15 2.12
 2 6 -3 8.96 1.95
 2 -6 -3 12.94 2.36
 -2 6 3 14.58 2.47
 -2 -6 2 6.8 1.69
 2 6 -2 6.67 1.59
 -2 6 2 8.12 1.72
 2 -6 -2 4.98 1.41
 -2 6 2 4.82 1.44
 2 6 -2 6.04 1.7
 2 -6 -2 7.15 1.83
 -2 -6 2 6.53 1.67
 2 6 -1 17.38 2.62
 2 6 -1 15.53 2.76
 -2 6 1 13.95 2.21
 2 -6 -1 11.61 2.37
 -2 6 1 11.89 2.23
 -2 -6 1 12.43 2.2
 -2 -6 1 14.32 2.14
 -2 -6 0 397.42 16.43
 2 6 0 416.12 18.13
 -2 6 0 423.62 16.43
 -2 -6 0 377.76 14.93
 -2 6 0 419.47 16.86
 2 -6 0 409.89 17.92
 -2 6 -1 30.37 3.71
 -2 -6 -1 25.07 2.85
 -2 -6 -1 24.64 3.21
 2 -6 1 29.45 3.99
 -2 6 -1 25.81 3.21
 2 6 1 25.1 3.86
 -2 6 -2 6.55 2.05
 -2 -6 -2 4.5 1.22
 2 -6 2 7.06 1.99
 -2 6 -2 2.9 1.02
 2 6 2 6.02 1.99
 -2 6 -2 5.64 1.63
 -2 -6 -2 6.3 1.71
 2 6 3 98.84 9.16
 -2 -6 -3 80.41 5.88
 -2 6 -3 85.07 7.08
 -2 -6 -3 84.26 6.83
 -2 6 -3 92.03 8.39
 2 -6 3 82.13 7.48
 -2 -6 -4 62.64 6.16
 -2 6 -4 63.49 6.97
 -2 6 -4 67.29 6.5
 2 6 4 71.49 8.46
 -2 -6 -5 723.06 29.28
 -2 6 -5 758.63 30.28
 -2 6 -5 802.2 32.22
 2 6 5 689.46 31.69
 -2 -6 -6 301.16 16.78
 -2 6 -6 330.59 18.9
 -2 6 -6 321.25 17.67
 2 6 6 284.97 18.41
 -2 6 -7 174.9 12.85
 -2 6 -7 164.18 13.3
 -2 -6 -7 156.14 12.02
 2 6 7 151.81 13.01
 -2 -6 -8 479.95 24.7
 -2 6 -8 538.49 25.89
 -2 6 -8 517.14 26.88
 2 6 8 453.11 25.63
 -2 6 -9 3.1 1.84
 -2 6 -9 3.07 1.94
 2 -6 9 2.73 1.69
 -2 -6 -9 4.38 2.13
 2 6 9 1.29 1.3
 -2 -6 -10 2.08 1.44
 -2 6 -10 7.13 2.78
 -2 -6 -11 6.3 2.85
 -2 -6 -11 7.53 1.9
 -2 6 -11 8.22 3.27
 -2 -6 -12 80.7 11.11
 -2 6 -12 97.24 12.23
 -2 -6 -13 12.15 4.2
 -2 6 -13 16.9 5.41
 -2 -6 -14 175.17 18.33
 -2 6 -14 161.71 17.35
 -2 -6 -15 47.18 9.64
 -2 6 -15 38.35 8.59
 -2 6 -16 76.57 12.44
 -2 -6 -16 74.93 12.52
 -2 -6 -17 7.04 3.85
 -2 6 -17 10.4 4.17
 -2 6 -18 86.64 14.2
 -2 -6 -18 98.83 15.67
 -2 -6 -19 1.18 1.38
 -2 6 -19 2.61 2.92
 -2 -6 -20 -0.61 1.84
 -2 6 -20 3.53 3.61
 -2 -6 -21 4.69 3.93
 -2 6 -21 -0.07 2.76
 2 7 -23 13.97 5.67
 2 -7 -23 16.33 5.96
 2 -7 -22 -0.24 1.21
 2 7 -22 2.06 3.1
 2 7 -21 4.09 3.11
 2 -7 -21 1.03 2.5
 2 -7 -20 6.78 3.69
 2 7 -20 3.74 3.01
 2 7 -19 38.9 8.72
 2 -7 -19 45.26 9.37
 2 -7 -18 77 11.92
 2 7 -18 74.01 11.13
 2 -7 -17 7.64 3.75
 2 7 -17 2.37 1.79
 2 -7 -16 73.89 10.71
 2 7 -16 71.79 10.14
 2 -7 -15 9.65 3.39
 2 7 -15 7.85 3.24
 2 -7 -14 20.87 5.11
 2 7 -14 16.18 4.46
 -2 7 14 33.2 9.79
 -2 -7 14 39.12 9.6
 -2 7 13 76.41 15.59
 2 -7 -13 119.25 12.05
 -2 -7 13 109.86 15.28
 2 7 -13 90.99 10.24
 -2 7 13 74.12 9.61
 2 -7 -12 78.94 9.36
 -2 -7 12 76.7 13.69
 2 7 -12 62.11 8.01
 2 -7 -12 94.99 12.39
 -2 7 12 58.76 8.05
 -2 7 12 39.56 12.16
 2 -7 -11 479.35 25.87
 2 7 -11 395.62 21.74
 2 7 -11 347.28 20.46
 -2 -7 11 234.68 27.24
 2 -7 -11 424.03 22.6
 2 7 -11 393.33 41.33
 -2 7 11 314.09 19.98
 -2 7 10 6.61 2.43
 2 -7 -10 6.06 1.95
 2 7 -10 7.14 2.59
 2 7 -10 15.58 6.97
 2 7 -10 7.59 2.61
 -2 -7 10 2.05 5.13
 2 -7 -10 11.98 3.33
 -2 7 9 348.58 20.41
 2 7 -9 412.91 21.32
 2 -7 -9 449.57 21.84
 2 7 -9 353.42 19.83
 2 -7 -9 495.4 22.17
 2 7 -9 528.1 32.92
 2 7 -8 8.45 2.55
 2 7 -8 9.9 2.63
 -2 7 8 10.9 2.94
 2 -7 -8 14.22 3.07
 2 -7 -8 10.68 2.74
 2 7 -8 16.06 4.55
 2 7 -7 524.76 24.15
 2 -7 -7 544.23 22.86
 -2 7 7 597.07 28.3
 -2 7 6 19.98 3.58
 -2 -7 6 13.61 2.89
 2 -7 -6 21.21 3.2
 2 7 -6 27.46 4.23
 2 7 -6 23.43 3.84
 -2 7 5 26 4.1
 -2 -7 5 22.75 3.8
 2 -7 -5 24.77 3.36
 2 7 -5 31.64 4.15
 2 7 -5 26.56 3.96
 -2 7 4 157.14 10.38
 2 -7 -4 159.3 9.01
 2 7 -4 180.35 10.03
 -2 -7 4 153.43 10.15
 2 7 -4 176.14 10.64
 -2 7 3 17.39 3.08
 2 -7 -3 16.89 2.55
 -2 7 3 14.19 2.7
 -2 -7 3 14.77 2.86
 2 7 -3 18.68 3.18
 2 7 -3 20.88 3
 -2 -7 2 11.47 2.32
 -2 7 2 10.58 2.01
 2 7 -2 12.91 2.23
 -2 7 2 10.88 2.34
 2 -7 -2 12.54 2.51
 -2 -7 2 11.38 3.98
 2 7 -2 12.36 2.56
 2 -7 -1 30.23 4.09
 2 7 -1 33.86 4.4
 -2 7 1 31 3.39
 -2 7 1 30.81 3.83
 -2 -7 1 25.95 3.6
 -2 -7 1 29.75 3.46
 -2 7 0 18.44 2.99
 2 7 0 18.49 3.41
 -2 7 0 24.74 3.06
 -2 -7 0 17.55 2.28
 -2 -7 0 14.99 2.63
 2 7 1 69.11 6.81
 -2 7 -1 65.46 5.36
 -2 -7 -1 66.56 5.78
 -2 -7 -1 56.09 4.32
 -2 7 -1 65.17 5.93
 2 7 2 21.27 3.82
 -2 7 -2 21.47 3.21
 -2 -7 -2 20.86 2.53
 -2 -7 -2 18.9 3.02
 -2 7 -2 30.13 4.59
 -2 7 -2 24.94 3.71
 -2 7 -3 405.35 18.56
 2 7 3 410.51 20.91
 -2 -7 -3 365.27 15.14
 -2 -7 -3 379.49 17.57
 -2 7 -3 407.93 20.37
 2 7 3 394.76 20.35
 -2 7 -4 2.91 1.53
 2 7 4 3.58 1.66
 -2 7 -4 1.44 1.17
 -2 -7 -4 1.65 0.66
 2 7 5 53.82 7.46
 -2 -7 -5 51.88 6.07
 -2 7 -5 50.62 6.11
 -2 7 -5 52.74 6.94
 -2 -7 -6 219.16 14.13
 -2 7 -6 241.31 15.09
 2 7 6 202.12 15.57
 -2 7 -6 230.17 16.01
 -2 -7 -7 31.18 5.03
 -2 7 -7 34.38 5.61
 -2 7 -7 38.29 6.28
 2 7 7 34.59 6.19
 -2 -7 -8 52.78 7.07
 2 7 8 48.93 7.5
 -2 7 -8 64.9 8.04
 -2 7 -8 58.47 8.23
 -2 7 -9 22.19 5.33
 -2 -7 -9 17.27 4.07
 -2 -7 -10 137.95 12.94
 -2 7 -10 145.69 14.22
 -2 7 -11 289.9 21.45
 -2 -7 -11 291.95 20.56
 -2 -7 -12 4.8 2.68
 -2 7 -12 2.79 1.66
 -2 -7 -13 350.73 24.79
 -2 7 -13 356.77 25.75
 -2 -7 -14 199.3 18.84
 -2 7 -14 222.09 20.36
 -2 -7 -15 0.39 1.69
 -2 7 -15 0.9 2.56
 -2 -7 -16 7.67 3.35
 -2 -7 -16 3.33 2.83
 -2 7 -16 12.37 5.05
 -2 -7 -17 -0.64 1.45
 -2 -7 -17 1.64 1.97
 -2 7 -17 2.34 3.11
 -2 -7 -18 156.56 18.84
 -2 7 -18 141.76 18.54
 -2 -7 -18 143.36 18.19
 -2 -7 -19 -1.14 2.24
 -2 -7 -19 -0.53 2.03
 -2 7 -19 0.24 0.69
 -2 -7 -20 4.11 3.39
 -2 -7 -20 1.33 2.53
 -2 7 -20 3.39 3.89
 2 8 -23 29.67 8.54
 2 -8 -22 38.35 9.27
 2 8 -22 22.84 7.17
 2 -8 -21 1.23 1.99
 2 8 -21 0.38 1.99
 2 -8 -20 12.46 4.94
 2 8 -20 13.48 5.11
 2 -8 -19 3.55 1.69
 2 8 -19 2.99 2.62
 2 -8 -18 223 20.42
 2 8 -18 172.83 17.61
 2 -8 -17 2.65 2.4
 2 8 -17 0.81 1.7
 2 -8 -16 10.64 3.91
 2 8 -16 12.13 4.24
 2 -8 -15 22.58 5.71
 2 8 -15 15.37 4.59
 2 -8 -14 178.87 15.89
 2 8 -14 131.62 13.21
 -2 8 14 184.98 20.46
 2 8 -13 0.95 1.34
 2 -8 -13 0.68 1.71
 2 -8 -12 1.05 1.93
 2 -8 -12 0.98 0.4
 2 8 -12 -0.17 1.14
 -2 -8 12 4.17 3.89
 2 -8 -11 84.37 9.45
 2 -8 -11 97.45 9.77
 2 8 -11 61.19 7.97
 2 8 -11 77.78 15.47
 -2 -8 11 76.36 12.94
 -2 8 11 61.48 8.16
 -2 8 10 2.7 1.56
 2 8 -10 2.97 1.73
 2 -8 -10 6.31 2.44
 2 -8 -10 4.29 1.79
 2 8 -10 1.61 1.05
 2 8 -10 2.25 2.2
 2 8 -9 49.46 6.66
 2 -8 -9 48.32 6.4
 2 -8 -9 54.23 6.19
 2 8 -9 53.6 8.71
 2 8 -9 39.86 5.92
 -2 8 9 38.74 6.09
 2 8 -8 50.51 6.49
 2 -8 -8 45.92 6.05
 2 -8 -8 47.78 5.41
 2 8 -8 68.79 8.26
 2 8 -8 40.55 5.81
 -2 8 8 48.41 6.83
 -2 -8 7 278.94 16.93
 -2 8 7 297.48 18.07
 2 8 -7 288.96 17.09
 2 -8 -7 331.51 15.75
 2 -8 -7 356.01 17.8
 2 8 -7 347.4 18.21
 2 8 -6 59.58 6.15
 2 -8 -6 55.54 6.1
 -2 -8 6 43.08 5.64
 2 -8 -6 57.91 5.39
 2 8 -6 53.94 6.23
 -2 8 6 50.24 6.44
 -2 -8 5 125.73 9.9
 -2 8 5 124.05 10.05
 2 -8 -5 137.16 8.46
 2 8 -5 137.92 10.14
 -2 8 4 65.7 6.79
 2 -8 -4 67.44 5.5
 2 8 -4 81.16 6.4
 -2 -8 4 68.33 6.77
 2 8 -4 78.75 7.22
 -2 8 3 95.74 8.08
 2 -8 -3 89.81 6.46
 2 8 -3 109.4 7.12
 -2 -8 3 87.49 7.51
 2 8 -3 106.31 8.44
 -2 8 3 80.13 8.02
 2 8 -2 54.61 4.7
 -2 -8 2 44.2 5.1
 -2 8 2 46.31 5.29
 2 8 -2 55.78 5.94
 -2 8 2 55.99 4.78
 -2 -8 1 155.2 9.97
 2 8 -1 183.94 11.63
 -2 8 1 166.92 10.44
 -2 8 1 165.29 8.62
 -2 8 0 -0.46 0.43
 -2 -8 0 0.18 0.29
 2 8 0 0.65 0.69
 -2 -8 0 0.31 0.55
 -2 8 -1 1.42 0.7
 -2 -8 -1 0.65 0.71
 -2 -8 -1 0.55 0.43
 -2 8 -1 0.69 0.52
 2 8 1 0.94 0.86
 2 -8 2 45.72 5.86
 2 8 2 43.32 5.87
 -2 8 -2 40.76 4.41
 -2 -8 -2 39.5 3.51
 -2 8 -2 47.69 5.52
 -2 -8 -2 38.7 4.8
 2 8 3 5.27 2.17
 -2 -8 -3 8.11 1.53
 -2 8 -3 6.37 2.56
 2 -8 3 5.75 2.14
 -2 8 -3 9.98 2.67
 -2 -8 -3 5.72 1.89
 -2 8 -4 22.04 4.06
 2 8 4 20.84 4.62
 -2 -8 -4 22.91 2.95
 -2 -8 -4 24.71 3.97
 -2 8 -4 22.87 4.51
 2 -8 4 24.4 4.45
 2 8 5 24.47 5.65
 -2 8 -5 18.47 3.79
 -2 8 -5 22.82 4.64
 -2 -8 -5 15.55 3.17
 -2 -8 -6 374.6 19.76
 -2 8 -6 374.96 20.2
 -2 8 -6 358.96 21.52
 2 8 6 355.68 22.2
 -2 -8 -7 7.88 2.89
 -2 8 -7 9.76 3.43
 -2 8 -7 13.23 3.56
 -2 -8 -8 770.41 33.97
 -2 8 -8 771.67 36.53
 -2 -8 -9 172.06 14.17
 -2 8 -9 190.05 16.22
 -2 -8 -10 1.44 1.51
 -2 8 -10 1.55 1.67
 -2 -8 -11 79.13 10.09
 -2 8 -11 76.61 10.61
 -2 -8 -12 61.63 9.18
 -2 8 -12 64.81 10.04
 -2 -8 -13 48.09 8.44
 -2 8 -13 46.75 8.88
 -2 -8 -14 -0.24 1.15
 -2 8 -14 5.14 3.5
 -2 -8 -15 7.34 3.69
 -2 8 -15 7.7 3.8
 -2 -8 -16 7.93 3.89
 -2 8 -16 7.95 3.7
 -2 -8 -17 20.21 6.19
 -2 8 -17 17.28 6.31
 -2 -8 -18 -1.21 2.28
 -2 8 -18 1.77 1.74
 -2 -8 -19 18.52 6.1
 -2 8 -19 15.79 6.14
 -2 -8 -20 3.57 1
 -2 8 -20 8.89 5.44
 2 -9 -22 20.75 7.31
 2 9 -22 9.96 4.47
 2 -9 -21 95.44 14.89
 2 9 -21 83.68 13.8
 2 -9 -20 30.22 7.88
 2 9 -20 22.34 6.18
 2 9 -19 10.87 4.19
 2 -9 -19 17.27 6.44
 2 -9 -18 15.64 5.13
 2 9 -18 11.54 4.36
 2 -9 -17 116.01 14.11
 2 9 -17 79.57 11.3
 2 -9 -16 1.26 1.59
 2 9 -16 3.34 2.44
 2 9 -15 2 1.74
 2 -9 -15 2.44 2.33
 2 -9 -14 3.12 2.11
 2 9 -14 3.52 2.23
 2 -9 -13 106.51 11.68
 -2 9 13 112.86 15.56
 2 9 -13 80.48 10.1
 2 -9 -12 106.29 11.44
 2 -9 -12 121.48 11.43
 -2 9 12 96.19 15.2
 2 9 -12 82.71 9.9
 2 -9 -11 91.87 9.93
 2 9 -11 65.63 8.51
 2 -9 -11 97.11 9.4
 2 9 -11 77.41 12.88
 -2 -9 11 93.77 13.53
 -2 9 11 48.18 12.86
 -2 9 10 10.44 3.23
 2 9 -10 6.91 2.48
 2 -9 -10 12.46 3.12
 -2 -9 10 21.54 6.51
 2 9 -10 12.34 4.22
 2 -9 -10 10.88 3.36
 2 9 -9 1.51 1.04
 -2 9 9 0 0.9
 2 -9 -9 0.22 0.62
 2 9 -9 1.84 1.76
 2 -9 -9 -1.04 1.3
 -2 -9 9 2.48 2.72
 2 -9 -8 244.71 13.67
 2 -9 -8 266.55 16.13
 2 9 -8 312.2 17.54
 2 9 -8 214.61 15.14
 2 9 -8 260.39 16.39
 -2 9 8 273.79 19.88
 2 -9 -7 39.8 5.56
 2 -9 -7 42.33 4.79
 2 9 -7 56.79 6.36
 2 9 -7 49.49 6.45
 -2 -9 7 35.75 5.5
 -2 9 7 28.51 5.15
 -2 9 6 18.12 3.86
 2 -9 -6 20.45 3.04
 2 9 -6 22.59 3.65
 2 9 -6 19.1 3.85
 -2 -9 6 14.42 3.39
 2 -9 -6 25.42 4.41
 -2 9 5 91.51 8.92
 2 -9 -5 93.1 6.75
 2 9 -5 114.59 8.06
 2 9 -5 116.63 9.56
 2 -9 -5 110.28 9.14
 -2 -9 5 85.52 8.47
 -2 9 4 23.66 4.21
 2 -9 -4 22.49 3.09
 2 9 -4 25.27 3.46
 -2 -9 4 19.9 3.88
 2 -9 -4 25.39 4.29
 2 9 -4 26.63 4.35
 2 9 -3 5.19 1.48
 2 -9 -3 4.56 1.96
 -2 9 3 6.29 3.38
 -2 9 3 3.92 1.74
 -2 -9 3 3.27 1.68
 2 9 -3 4.4 2.02
 2 -9 -2 0.09 0.72
 2 9 -2 0.46 0.41
 -2 -9 2 -0.08 0.86
 -2 9 2 0.21 0.72
 2 9 -2 0.63 0.85
 -2 9 2 0.3 0.49
 -2 9 1 19.48 3.55
 -2 9 1 18.31 2.63
 2 -9 -1 17.8 3.52
 2 9 -1 23.28 4.22
 -2 -9 1 13.77 2.86
 -2 9 0 1.99 0.89
 2 -9 0 2.2 1.19
 -2 -9 0 1.1 0.9
 -2 -9 0 3.05 1.22
 2 9 0 2.59 1.43
 -2 9 0 3.18 1.38
 -2 9 -1 9.75 2.58
 2 -9 1 10.27 2.81
 2 9 1 11.11 3.12
 -2 -9 -1 8.51 2.34
 -2 9 -1 9.58 1.91
 -2 -9 -1 7.91 1.5
 -2 9 -2 19.72 2.92
 -2 -9 -2 17.68 2.19
 2 9 2 14.26 3.67
 -2 -9 -2 19.12 3.61
 -2 9 -2 17.06 3.58
 2 -9 2 14.73 3.35
 2 9 3 68.49 8.24
 -2 -9 -3 60.56 4.62
 2 -9 3 72.49 8.07
 -2 9 -3 74.32 8.63
 -2 -9 -3 67.2 6.83
 -2 9 -3 74.13 6.43
 -2 9 -3 78.45 7.7
 2 9 4 8.43 3.09
 2 9 4 6.53 2.45
 2 -9 4 5.53 2.12
 -2 -9 -4 6.47 1.51
 -2 9 -4 7.41 2.69
 -2 9 -4 8.16 2.4
 -2 -9 -4 5.36 1.9
 -2 9 -5 9.67 3.21
 -2 -9 -5 9.47 2.03
 -2 -9 -5 12.2 2.84
 -2 9 -5 10.94 2.8
 -2 9 -6 4.69 2.07
 -2 -9 -6 -0.38 1.38
 -2 -9 -7 500.48 25.17
 -2 9 -7 513.92 27.97
 -2 -9 -8 1211.25 47.89
 -2 9 -8 1293.16 51.9
 -2 -9 -9 11.43 3.88
 -2 9 -9 12.75 4.47
 -2 -9 -10 7.11 2.73
 -2 9 -10 1.89 1.79
 -2 -9 -11 51.23 8.26
 -2 9 -11 56.85 9.36
 -2 -9 -12 28.53 6.51
 -2 9 -12 27.5 6.65
 -2 -9 -12 33.17 7.39
 -2 -9 -13 6.39 3.02
 -2 9 -13 2.96 1.66
 -2 -9 -14 2.18 1.51
 -2 9 -14 -0.17 0.4
 -2 -9 -15 26 6.89
 -2 9 -15 22.53 6.46
 -2 -9 -16 20.44 6.21
 -2 9 -16 24.52 7.29
 -2 -9 -17 221.19 21.58
 -2 9 -17 192.91 21.43
 -2 -9 -18 32.18 8.19
 -2 9 -18 25.91 8.06
 -2 -9 -19 20.14 6.82
 -2 9 -19 15.38 6.23
 2 -10 -21 47.38 10.2
 2 10 -21 34.13 8.77
 2 -10 -20 87.59 13.58
 2 10 -20 84.76 12.96
 2 10 -19 14.45 5.21
 2 -10 -19 24.46 7.01
 2 -10 -18 82.65 12.42
 2 10 -18 61.64 10.53
 2 -10 -17 73 11.12
 2 10 -17 54.77 9.61
 2 -10 -16 57.13 9.67
 2 10 -16 44.53 8.17
 2 10 -15 2.17 2.47
 2 -10 -15 1.96 2.31
 2 -10 -14 63.98 9.45
 2 10 -14 37.05 7.12
 2 10 -13 18.94 4.88
 2 -10 -13 28.53 6.1
 2 -10 -12 2.32 1.77
 2 -10 -12 3.01 1.62
 2 10 -12 1.74 1.16
 2 -10 -11 39.37 6.45
 2 -10 -11 37.7 5.58
 2 10 -11 21.89 4.89
 2 10 -11 41.04 8.62
 2 10 -10 14.71 4.05
 2 -10 -10 16.85 3.42
 2 10 -10 30.76 6.21
 2 -10 -10 15.84 3.94
 -2 10 10 10.02 5.98
 -2 -10 10 27.56 7.21
 2 -10 -9 109.78 8.69
 2 -10 -9 122.09 11.2
 2 10 -9 145.51 12.12
 -2 -10 9 124.32 14.71
 2 10 -9 94.19 10.16
 -2 10 8 3.29 2.1
 -2 -10 8 7.71 2.67
 2 10 -8 5.6 2.15
 2 10 -8 7.44 2.53
 2 -10 -8 5.11 1.66
 2 -10 -8 7.67 2.65
 -2 -10 7 -1.58 1.36
 -2 10 7 0.43 1.29
 2 -10 -7 0.88 0.82
 2 10 -7 0.33 1.03
 2 -10 -7 -0.12 0.66
 -2 10 6 98.61 10.05
 2 -10 -6 96.77 7.06
 -2 -10 6 89.56 9.2
 2 -10 -6 107.04 9.74
 2 10 -5 11.57 3.17
 2 10 -5 12.22 2.57
 2 -10 -5 8.67 1.91
 -2 10 5 12.74 3.25
 -2 -10 5 10.58 2.93
 2 -10 -5 9.93 2.89
 2 10 -4 15.19 3.37
 -2 -10 4 8.84 2.65
 2 10 -4 14.48 2.48
 -2 10 4 12.29 3.11
 2 -10 -4 14.54 3.44
 2 -10 -3 189.18 12.96
 -2 10 3 161.05 12.35
 2 10 -3 198.16 10.04
 2 10 -3 194.44 13.34
 -2 -10 3 152.88 11.65
 2 -10 -2 0.95 1.14
 -2 -10 2 0.47 0.92
 -2 10 2 0.55 0.26
 2 10 -2 -0.75 1.06
 -2 10 2 -1.76 1.72
 -2 -10 1 8.56 2.39
 2 -10 -1 11.41 3
 2 10 -1 11.33 3.1
 -2 10 1 11.81 2.07
 -2 10 1 12.01 3
 2 -10 0 16.03 3.63
 -2 10 0 17.76 2.56
 -2 10 0 16.2 3.45
 2 10 0 20.86 4.25
 -2 -10 0 16.31 3.32
 2 10 1 256.82 16.59
 -2 10 -1 235.33 14.51
 -2 10 -1 251.21 11.67
 2 -10 1 248.48 15.97
 -2 -10 -1 228.17 14
 -2 -10 -1 200.68 11.03
 2 10 2 419.28 22.67
 -2 10 -2 414.41 16.92
 -2 10 -2 401.07 20.33
 -2 -10 -2 385.59 14.41
 -2 -10 -2 390.44 19.54
 2 -10 2 380.95 21.4
 2 -10 3 279 17.83
 -2 10 -3 308.65 14.38
 -2 -10 -3 267.3 11.19
 -2 -10 -3 284.14 16.11
 -2 10 -3 295.14 16.96
 -2 -10 -4 140.37 7.56
 -2 -10 -4 156.11 11.53
 2 -10 4 158.84 13.01
 -2 10 -4 167.07 13.88
 -2 -10 -5 89.5 6.05
 -2 -10 -5 80.94 8.4
 2 -10 5 111.7 10.98
 -2 10 -5 99.83 10.77
 -2 -10 -6 3.82 1.28
 -2 10 -6 2.34 1.35
 -2 -10 -6 4.2 1.68
 -2 -10 -7 533.45 26.55
 -2 10 -7 551.05 29.72
 -2 10 -8 3.4 2.64
 -2 -10 -8 1.89 1.3
 -2 -10 -9 473.94 26.06
 -2 10 -9 473.65 28.64
 -2 10 -10 5.29 2.97
 -2 -10 -10 2.92 2.08
 -2 -10 -11 18.75 5.67
 -2 -10 -11 11.41 3.43
 -2 10 -11 13.78 4.65
 -2 10 -12 140.28 15.83
 -2 -10 -12 109.13 14.29
 -2 -10 -12 139.87 14.39
 -2 -10 -13 25.76 6.2
 -2 10 -13 25.12 6.52
 -2 -10 -14 21.18 6.12
 -2 10 -14 25.39 7.08
 -2 10 -15 29.6 7.68
 -2 -10 -15 28.46 7.22
 -2 -10 -16 1.01 1.5
 -2 10 -16 0.87 2.38
 -2 -10 -17 81.69 12.86
 -2 10 -17 70.02 12.67
 -2 -10 -18 23.13 7.1
 -2 10 -18 18.13 6.68
 2 -11 -20 54.24 10.79
 2 11 -20 48.08 9.68
 2 -11 -19 90.31 13.75
 2 11 -19 87.52 12.99
 2 -11 -18 147.32 16.92
 2 11 -18 102.17 13.8
 2 11 -17 17.14 5.53
 2 -11 -17 23.54 6.51
 2 -11 -16 107.66 13.34
 2 11 -16 75.24 11.09
 2 -11 -15 88.54 11.77
 2 11 -15 59.16 9.47
 2 -11 -14 46.04 8.04
 2 11 -14 37.36 7.3
 2 11 -13 3.82 2.69
 2 -11 -13 6.28 2.96
 2 -11 -12 40.93 7.21
 2 -11 -12 39.08 5.71
 2 11 -12 32.87 6.39
 2 11 -11 3 2.2
 2 -11 -11 2.19 1.29
 2 11 -11 2.34 1.74
 2 -11 -11 2.42 2.24
 2 -11 -10 70.84 7.07
 2 -11 -10 83.09 9.64
 2 11 -10 61.88 8.59
 -2 11 10 78.4 12.28
 2 11 -10 95.54 10.06
 2 -11 -9 109.96 8.58
 2 11 -9 131.48 11.06
 2 11 -9 96.09 10.54
 -2 11 9 78.8 14.94
 2 -11 -9 124.91 11.47
 2 11 -8 11.81 3.35
 2 -11 -8 15.69 2.86
 -2 -11 8 18.54 4.21
 2 11 -8 19.09 3.74
 2 -11 -8 18.05 4.13
 2 -11 -7 122.69 8.38
 2 11 -7 160.34 10.67
 -2 -11 7 129.8 11.83
 2 -11 -7 159.21 12.63
 -2 -11 6 17.74 5.32
 2 -11 -6 16.19 2.61
 2 -11 -6 18.76 4.13
 2 11 -6 18.72 3.2
 -2 -11 6 16.92 3.94
 2 11 -5 42.67 4.68
 2 -11 -5 49.96 6.69
 -2 -11 5 34.72 5.8
 2 11 -4 22.29 3.11
 -2 -11 4 22.04 4.41
 2 -11 -4 26.42 4.78
 -2 -11 3 -0.26 0.55
 2 -11 -3 -0.57 0.73
 2 -11 -2 143.92 11.72
 -2 -11 2 122.03 10.42
 -2 -11 1 126.75 10.58
 2 -11 -1 144.83 12.06
 -2 11 1 143.39 9.05
 2 -11 0 670.6 30.57
 -2 11 0 697.4 23.59
 -2 11 -1 40.16 3.97
 2 -11 1 42.19 6.36
 -2 -11 -1 35.48 5.4
 -2 11 -2 366.3 15.2
 -2 -11 -2 326.95 18.3
 -2 -11 -2 306.17 14.47
 2 -11 2 370.2 21.43
 -2 11 -3 236.76 12.13
 -2 -11 -3 230.69 9.59
 -2 -11 -3 218.93 14.56
 2 -11 3 235.94 16.83
 -2 11 -4 222.39 12.49
 -2 -11 -4 200.88 9.08
 -2 11 -4 218.51 16.98
 -2 -11 -4 207.42 14.25
 2 -11 4 211.79 16.05
 -2 -11 -5 96.4 5.97
 -2 11 -5 104.28 11.44
 -2 -11 -5 97.49 9.57
 2 -11 5 110.03 11.32
 -2 -11 -6 48.85 4.35
 -2 -11 -6 49.06 6.77
 -2 11 -6 56.69 8.62
 -2 -11 -7 48.01 4.75
 -2 -11 -7 46.05 6.87
 -2 11 -7 48.26 8.15
 -2 -11 -8 85.96 9.84
 -2 11 -8 93.84 11.78
 -2 11 -9 9.67 4.06
 -2 -11 -9 6.68 2.99
 -2 -11 -9 11.73 4.24
 -2 -11 -10 93.56 10.88
 -2 11 -10 95.71 12.56
 -2 -11 -10 78.89 11.18
 -2 -11 -11 105.68 12.11
 -2 11 -11 117.27 14.17
 -2 11 -12 1.01 1.07
 -2 -11 -12 3.18 2.05
 -2 -11 -13 38.23 7.61
 -2 11 -13 33.76 7.95
 -2 -11 -14 22.34 5.94
 -2 11 -14 22.78 6.79
 -2 -11 -15 5.89 3.21
 -2 11 -15 8.98 4.2
 -2 -11 -16 1.56 1.14
 -2 11 -16 -1.76 2.47
 -2 -11 -17 20.57 6.44
 -2 11 -17 22.89 7.1
 -2 -11 -18 9.44 4.71
 -2 11 -18 2.71 2.96
 2 12 -19 6.59 3.89
 2 -12 -19 4.22 3.15
 2 12 -18 6.23 3.7
 2 -12 -18 5.61 3.39
 2 -12 -17 209.44 19.77
 2 12 -17 158.11 17.17
 2 12 -16 17.66 5.42
 2 -12 -16 22.15 6.1
 2 -12 -15 170.14 16.63
 2 12 -15 135.97 15.06
 2 -12 -14 12.17 4.22
 2 12 -14 15.61 4.83
 2 12 -13 13.64 4.49
 2 -12 -13 8.25 3.09
 2 12 -12 1.32 1.56
 2 -12 -12 5.73 2.79
 2 -12 -11 2.63 1.73
 2 12 -11 4.37 2.58
 2 12 -10 10.79 3.54
 2 -12 -10 13.86 3.98
 2 12 -10 18.95 4.34
 2 -12 -9 4.51 1.86
 2 12 -9 5.36 2.73
 2 12 -9 7.78 2.68
 2 -12 -8 3.13 1.66
 2 -12 -8 2.55 1.09
 2 12 -8 1.89 1.17
 2 12 -8 2.45 1.42
 -2 -12 8 1.57 1
 2 -12 -7 23.67 3.36
 2 12 -7 30.47 4.42
 2 -12 -7 27.64 5.28
 -2 -12 7 23.74 5.17
 2 12 -6 89.94 7.3
 -2 -12 6 78.88 9.35
 2 -12 -6 104.31 10.44
 2 12 -5 17.73 2.82
 -2 -12 5 13.6 3.63
 2 -12 -5 17.84 4.13
 2 12 -4 132.95 8.06
 -2 -12 4 137.6 11.6
 -2 -12 4 111.32 10.88
 2 -12 -4 123.79 11.45
 2 -12 -3 18.65 4.27
 -2 -12 3 22.01 4.5
 -2 -12 3 19.3 4.19
 2 -12 -2 139.85 11.98
 -2 -12 2 109.85 10.29
 -2 -12 1 805.77 33.39
 2 -12 -1 915.93 36.35
 2 -12 0 285.85 18.73
 -2 12 0 298.7 13.12
 -2 12 -1 238.59 10.83
 2 -12 1 209.05 16.22
 -2 -12 -1 202.52 14.48
 -2 12 -2 525.68 19.66
 -2 -12 -2 466.52 24.29
 2 -12 2 504.49 27.26
 2 -12 3 15.66 4.16
 -2 12 -3 20.7 3.1
 -2 -12 -3 14.37 3.61
 -2 -12 -3 8.92 2.05
 -2 12 -4 81.68 6.76
 -2 -12 -4 71.96 4.45
 2 -12 4 83.85 10.02
 -2 -12 -4 81.79 8.92
 -2 12 -4 78.58 10.11
 -2 -12 -5 55.56 4.02
 -2 12 -5 61.33 9.08
 -2 -12 -5 59.6 7.62
 2 -12 5 58.81 8.5
 -2 12 -5 63.47 6.41
 -2 -12 -6 49.35 6.48
 -2 12 -6 40.84 7.53
 -2 -12 -6 38.15 3.56
 -2 -12 -6 40.11 6.34
 -2 -12 -7 61.87 5.03
 -2 -12 -7 56.44 7.8
 -2 -12 -7 60.33 8.21
 -2 12 -7 62.2 9.6
 -2 -12 -8 73.21 6.08
 -2 -12 -8 72.85 9.15
 -2 12 -8 75.85 10.91
 -2 12 -9 16.22 4.88
 -2 -12 -9 20.61 4.95
 -2 -12 -10 1.22 1.66
 -2 12 -10 1.24 2.03
 -2 12 -11 -0.54 1.05
 -2 -12 -11 3.36 1.85
 -2 12 -12 4.95 3.27
 -2 -12 -12 6.65 3.08
 -2 -12 -13 17.26 5.12
 -2 12 -13 23.35 6.63
 -2 -12 -14 8.89 3.81
 -2 12 -14 11.69 4.97
 -2 -12 -15 4.75 2.47
 -2 12 -15 5.06 3.88
 -2 -12 -16 22.31 6.35
 -2 12 -16 17.99 6.75
 -2 12 -17 -3.32 2.74
 2 13 -18 91.03 13.48
 2 -13 -18 119.85 15.4
 2 13 -17 11.77 4.64
 2 -13 -17 18.36 5.42
 2 13 -16 35.74 7.76
 2 -13 -16 57.42 9.88
 2 13 -15 3.67 3.16
 2 -13 -15 6.96 3.58
 2 -13 -14 51.15 8.95
 2 13 -14 39.84 7.83
 2 -13 -13 32.53 6.7
 2 13 -13 21.1 5.64
 2 -13 -12 5.31 2.52
 2 13 -12 4.22 2.67
 2 -13 -11 93.76 11.28
 2 13 -11 65.14 9.52
 2 13 -10 41.53 7.52
 2 -13 -10 42.7 7.41
 2 13 -9 4.3 2.39
 2 -13 -9 3.62 2.11
 2 13 -8 0.01 1.49
 2 -13 -8 3.45 1.92
 -2 -13 8 -1.28 2
 2 -13 -7 -0.35 0.65
 -2 -13 7 0.01 0.59
 -2 -13 6 12.08 3.55
 2 13 -6 20.47 3.18
 2 -13 -6 21.67 4.84
 -2 13 6 14.99 4.45
 2 13 -5 343.02 13.77
 2 -13 -5 353.19 20.82
 2 -13 -4 49.11 7.29
 -2 -13 4 38.43 6.43
 2 -13 -3 46.39 7.09
 -2 -13 3 43.48 6.76
 2 -13 -2 17.87 4.58
 -2 -13 2 16.54 4.16
 -2 -13 1 13.93 3.88
 2 -13 -1 20.13 5.12
 -2 -13 0 263.01 17.42
 -2 13 0 245.1 16.42
 2 -13 0 296.54 19.7
 -2 -13 -1 50.17 7.07
 -2 13 -1 60.79 4.84
 -2 -13 -2 70.77 8.59
 -2 13 -2 87.66 5.93
 2 -13 2 72.71 9.71
 2 -13 3 44.13 7.48
 -2 13 -3 50.1 4.73
 -2 -13 -3 36.81 6.24
 -2 -13 -4 17.03 4.12
 -2 13 -4 18.63 4.96
 2 -13 4 21.29 5.15
 -2 13 -4 18.48 3
 -2 13 -5 67.22 6.3
 -2 -13 -5 59.21 3.7
 -2 13 -5 56.78 9.1
 -2 -13 -5 57.24 7.85
 2 -13 5 57.52 8.91
 -2 13 -6 100.69 8.65
 -2 -13 -6 82.91 4.89
 -2 13 -6 97.61 12.42
 -2 -13 -6 100.85 10.64
 2 -13 6 98.44 11.8
 -2 -13 -7 170.07 8.4
 -2 13 -7 196.34 18.11
 -2 -13 -7 184.02 15.01
 -2 -13 -8 47.83 4.31
 -2 13 -8 56.04 9.4
 -2 -13 -8 48.36 7.61
 -2 13 -9 7.09 3.55
 -2 -13 -9 5.69 2.92
 -2 13 -10 2.23 2.51
 -2 -13 -10 0.5 0.41
 -2 13 -11 5.9 2.94
 -2 -13 -11 5.26 2.55
 -2 13 -12 0.78 1.73
 -2 -13 -12 0.06 0.63
 -2 13 -13 51.09 10.18
 -2 -13 -13 72.5 10.67
 -2 13 -14 -0.39 1.45
 -2 -13 -14 -0.37 0.91
 -2 13 -15 11.73 5
 -2 -13 -15 12.83 4.96
 2 -14 -16 65.32 10.73
 2 14 -16 44.46 8.96
 2 -14 -15 0.73 1.19
 2 14 -15 5.05 3.13
 2 -14 -14 84.31 11.73
 2 14 -14 64.97 10.45
 2 -14 -13 -1.1 1.32
 2 14 -13 0.38 1.36
 2 -14 -12 0.4 1.11
 2 14 -12 1.24 1.55
 2 -14 -11 7 3.28
 2 14 -11 5.28 2.8
 2 -14 -10 2.02 1.73
 2 14 -10 0.6 1.26
 2 14 -9 43.23 7.65
 2 -14 -9 53.94 8.43
 2 14 -8 31.96 6.52
 2 -14 -8 37.2 6.91
 -2 -14 8 26.66 5.87
 -2 -14 7 102.41 11.78
 2 -14 -7 145.16 13.72
 -2 -14 6 2.44 1.36
 2 -14 -6 4.32 3.25
 -2 -14 5 0.99 1.14
 2 -14 -5 1.5 1.69
 2 -14 -4 92.79 10.61
 -2 -14 4 72.05 9.42
 2 -14 -3 7.7 3.3
 -2 -14 3 3.88 2.54
 2 -14 -2 272.01 19.47
 -2 -14 2 244.56 17.66
 -2 -14 1 3.93 2.27
 2 -14 -1 7.99 3.09
 -2 -14 0 34.84 6.2
 2 -14 0 41.69 7.44
 2 -14 1 21.34 5.3
 -2 14 -1 17.81 3.77
 -2 -14 -1 17.53 4.35
 -2 14 -2 93.75 6.1
 2 -14 2 100.32 11.74
 -2 -14 -2 94.42 10.34
 2 -14 3 3.63 2.18
 -2 -14 -3 4.79 2.44
 -2 14 -3 5.58 1.5
 -2 14 -4 7.36 1.85
 2 -14 4 6.62 2.9
 -2 14 -4 4.77 2.5
 -2 -14 -4 6.76 2.68
 2 -14 5 9.08 3.62
 -2 14 -5 13.64 2.63
 -2 -14 -5 7 2.81
 -2 14 -5 11.93 4.29
 2 -14 6 3.98 2.41
 -2 -14 -6 6.06 2.72
 -2 14 -6 4.8 1.69
 -2 14 -6 2.76 2.04
 -2 14 -7 27 4.62
 -2 -14 -7 24.3 5.53
 -2 14 -7 20.19 5.8
 -2 -14 -8 9.58 3.72
 -2 14 -8 8.6 3.93
 -2 -14 -9 31.72 6.42
 -2 14 -9 36.04 8.04
 -2 -14 -10 20.43 5.35
 -2 14 -10 23.59 6.68
 -2 14 -11 0.68 2.57
 -2 -14 -11 2.51 1.58
 -2 -14 -12 47.59 8.59
 -2 14 -12 42.84 9.15
 -2 14 -13 1.72 1.48
 -2 -14 -13 2.23 2.43
 -2 14 -14 11.61 5.05
 -2 -14 -14 14.98 5.02
 2 -15 -15 13.43 5.13
 2 15 -15 5.5 3.1
 2 -15 -14 39.4 8.12
 2 15 -14 26.82 6.97
 2 -15 -13 183.87 17.82
 2 15 -13 135.44 15.47
 2 -15 -12 21.46 5.93
 2 15 -12 13.95 4.67
 2 15 -11 15.58 5.02
 2 -15 -11 16.68 4.74
 2 -15 -10 2.89 1.93
 2 15 -10 1.18 1.61
 2 -15 -9 10.77 3.99
 2 15 -9 10.34 3.95
 -2 -15 8 14.65 4.39
 2 15 -8 20.79 5.51
 2 -15 -8 21.41 5.4
 2 -15 -7 9.95 3.69
 -2 -15 7 5.62 2.67
 -2 -15 6 90.6 11.3
 2 -15 -6 103.82 12.21
 2 -15 -5 333.44 22.38
 -2 -15 5 269.33 20.33
 2 -15 -4 24.89 5.97
 -2 -15 4 17.82 4.47
 -2 -15 3 -0.9 1.65
 2 -15 -3 0.65 0.31
 2 -15 -2 54.22 8.7
 -2 -15 2 51.6 8.02
 2 -15 -1 185.55 16.64
 -2 -15 1 166.23 14.77
 -2 -15 0 53.95 8.19
 2 -15 0 59.57 9.29
 -2 -15 -1 73.54 9.43
 2 -15 1 72.07 10.35
 2 -15 2 2.33 1.21
 -2 -15 -2 5.09 2.24
 2 -15 3 1.96 1.76
 -2 -15 -3 1.99 1.35
 2 -15 4 5.01 2.46
 -2 15 -4 6.49 3.3
 -2 -15 -4 7.69 3.06
 2 -15 5 1.68 0.13
 -2 15 -5 -0.11 1.57
 -2 -15 -5 0.37 0.21
 2 -15 6 2.31 2.51
 -2 15 -6 2.08 2.17
 -2 -15 -6 2.62 1.68
 -2 15 -7 26.22 6.68
 -2 -15 -7 19.83 5.27
 -2 -15 -8 11.89 4.23
 -2 15 -8 12.14 4.74
 -2 -15 -9 39.27 7.37
 -2 15 -9 29.42 7.42
 -2 -15 -10 49.83 8.72
 -2 15 -10 37.89 8.76
 -2 -15 -11 107.06 13.05
 -2 15 -11 101.09 14.68
 -2 15 -12 -0.01 1.73
 -2 -15 -12 3.79 2.53
 2 -16 -13 12.76 5.12
 2 16 -13 7.89 3.62
 2 -16 -12 0.48 0.74
 2 16 -12 2.11 2.61
 2 -16 -11 1.07 1.7
 2 16 -11 0.35 1.77
 2 16 -10 0.45 1.63
 2 -16 -10 1.89 2.3
 2 -16 -9 5.95 2.33
 2 16 -9 6.1 3.02
 2 -16 -8 -0.95 1.63
 -2 -16 8 1.92 2.11
 2 16 -8 1 1.97
 -2 -16 7 20.65 5.49
 2 -16 -7 20.85 5.7
 2 -16 -6 86.34 11.42
 -2 -16 6 68.16 10.14
 2 -16 -5 15.32 4.68
 -2 -16 5 17.18 4.88
 2 -16 -4 39.41 7.67
 -2 -16 4 33.39 6.91
 -2 -16 3 -0.92 0.89
 2 -16 -3 1.74 1.09
 -2 -16 2 15.54 4.6
 2 -16 -2 16.68 5.06
 -2 -16 1 44.14 7.71
 2 -16 -1 61.06 9.68
 2 -16 0 9.65 3.97
 -2 -16 0 12.09 3.87
 -2 -16 -1 1.49 1.58
 2 -16 1 -0.85 1.56
 -2 -16 -2 26.08 5.87
 2 -16 2 20.15 5.74
 2 -16 3 1.37 1.94
 -2 -16 -3 0.62 1.01
 2 -16 4 16.03 5.28
 -2 16 -4 10.96 4.67
 -2 -16 -4 9.76 3.61
 -2 -16 -5 7.56 3.03
 2 -16 5 9.03 3.65
 -2 16 -5 5.77 3.32
 -2 16 -6 29.46 7.58
 2 -16 6 30.74 7.16
 -2 -16 -6 18.59 5.17
 -2 -16 -7 0.66 1.33
 -2 16 -7 0.36 1.39
 -2 -16 -8 2.31 1.47
 -2 16 -8 2.37 1.67
 -2 -16 -9 111.72 13.16
 -2 16 -9 89.4 13.7
 -2 -16 -10 114.89 13.65
 -2 16 -10 119.25 15.98
 2 17 -10 2 1.76
 2 -17 -10 -0.16 0.47
 2 17 -9 0.66 0.39
 2 -17 -9 1.3 1.91
 -2 -17 8 -1.35 2.06
 2 17 -8 1.42 1.36
 2 -17 -8 -0.48 1.44
 -2 -17 7 2.29 2.54
 2 -17 -7 3.64 1.88
 2 -17 -6 66.26 10.45
 -2 -17 6 53.72 9.18
 -2 -17 5 13.74 4.72
 2 -17 -5 9.07 3.52
 2 -17 -4 11.77 4.37
 -2 -17 4 14.97 4.67
 2 -17 -3 13.17 4.38
 -2 -17 3 8.09 2.95
 2 -17 -2 90.92 12.43
 -2 -17 2 63.91 10.02
 -2 -17 1 16.92 4.98
 2 -17 -1 22.09 6.28
 2 -17 0 15.23 4.91
 -2 -17 0 11.6 3.76
 -2 -17 -1 9.93 3.55
 2 -17 1 8.54 3.61
 2 -17 2 6.7 3.45
 -2 -17 -2 6.55 3.52
 -2 -17 -3 7.83 3.42
 2 -17 3 8.76 4.07
 -2 17 -3 6.89 3.94
 -2 -17 -4 64.78 9.74
 2 -17 4 73.52 11.43
 -2 17 -4 70.85 11.78
 -2 17 -5 -0.41 2.42
 2 -17 5 3.63 2.62
 -2 -17 -5 4.99 2.56
 -2 17 -6 26.88 7.45
 -2 -17 -6 19.86 5.34
 2 -17 6 18.85 5.88
 -2 -17 -7 -0.7 1.12
 -2 17 -7 1.38 1.67
 -2 17 -8 21.25 6.57
 2 -18 -6 19.52 5.74
 -2 -18 5 -0.66 0.17
 2 -18 -5 1.91 1.58
 2 -18 -4 49.6 9.49
 -2 -18 4 40.65 8.11
 2 -18 -3 35.93 8.12
 -2 -18 3 32.35 7.5
 2 -18 -2 22.55 6.31
 -2 -18 2 14.54 5.18
 -2 -18 1 30.06 6.87
 2 -18 -1 31.52 7.93
 -2 -18 0 1.69 2.06
 2 -18 0 -0.07 1.32
 -2 -18 -1 5.42 2.65
 2 -18 1 4.98 2.7
 2 -18 2 -0.65 0.57
 -2 -18 -2 -0.62 1.05
 -2 -18 -3 9.06 3.23
 2 -18 3 12 4.64
 -2 18 -3 14.39 5.07
 2 -18 4 -0.3 1.52
 -2 18 -4 2.17 1.72
 3 0 -24 12.33 5.14
 3 0 -23 -1.37 2.28
 3 0 -22 13.2 5.18
 3 0 -21 -0.82 0.85
 3 0 -20 2.31 1.73
 -3 0 20 10.77 6.57
 3 0 -19 0.94 1.43
 -3 0 19 8.43 6.03
 3 0 -18 6.15 3.3
 -3 0 18 15.72 9.04
 3 0 -17 -1.29 1.53
 -3 0 17 2.66 1.96
 -3 0 16 121.84 11.81
 3 0 -16 163.44 15.12
 3 0 -15 1.78 2.37
 -3 0 15 0.28 1.22
 -3 0 14 431.79 22.62
 -3 0 13 0.26 0.93
 -3 0 12 311.97 17.05
 3 0 -12 331.94 18.98
 3 0 -11 0.12 0.98
 -3 0 11 0.77 0.84
 -3 0 10 131.99 9.08
 3 0 -10 134.22 9.95
 3 0 -9 1.66 1.02
 3 0 -9 1.35 1.4
 -3 0 9 -0.07 0.33
 3 0 -8 52.74 6.96
 -3 0 8 45.9 4.12
 3 0 -8 47.27 4.44
 3 0 -7 0.9 0.29
 3 0 -7 -0.24 0.57
 3 0 -6 266.32 9.83
 3 0 -6 275.2 15.81
 3 0 -5 0.24 0.22
 3 0 -5 0.19 0.23
 3 0 -5 0.6 0.87
 3 0 -4 382.23 18.48
 3 0 -3 0.63 1.1
 3 0 -2 104.79 8.13
 3 0 -1 0.11 0.54
 3 0 -1 0.15 0.17
 3 0 0 2109.3 58.99
 -3 0 0 1948 57.09
 -3 0 -1 0.11 0.34
 3 0 1 -0.12 0.4
 3 0 2 297.89 13.4
 -3 0 -2 290.27 13.57
 -3 0 -3 -0.32 0.34
 3 0 3 0.77 0.53
 -3 0 -4 12.64 2.86
 3 0 4 14.71 2.94
 3 0 5 0.7 0.68
 -3 0 -5 -0.01 0.68
 3 0 6 583.1 25.99
 -3 0 -6 605.34 27.96
 3 0 7 0.59 0.05
 -3 0 -7 -0.6 0.44
 3 0 8 57.6 7.35
 -3 0 -8 67.09 8.77
 3 0 9 0.27 0.9
 -3 0 -9 1.12 1.31
 3 0 10 58.02 7.84
 -3 0 -10 67.09 9.66
 -3 0 -11 0.24 1.72
 -3 0 -12 619.09 35.74
 -3 0 -13 -1.26 1.33
 -3 0 -14 444.54 31.47
 -3 0 -15 0.71 2.3
 -3 0 -16 56.59 11.11
 -3 0 -17 3.41 3.33
 -3 0 -18 39 9.92
 -3 0 -19 3.03 3.62
 -3 0 -20 -0.46 2.94
 -3 0 -21 -1.17 0.25
 3 1 -24 0.26 2.24
 3 -1 -24 0.36 1.08
 3 1 -23 8.28 4.22
 3 -1 -23 4.26 3.28
 3 1 -22 2.1 1.99
 3 -1 -22 6.2 3.46
 3 -1 -21 1.52 0.89
 3 1 -21 1.06 0.97
 3 1 -20 11.44 4.61
 3 -1 -20 5.11 3.66
 -3 1 20 11.83 6.44
 -3 -1 20 13.24 7.21
 -3 -1 19 70.06 14.65
 -3 1 19 65.09 13.8
 3 1 -19 117.66 14.45
 3 -1 -19 108.39 13.96
 3 -1 -18 -0.89 1.46
 -3 -1 18 6.42 5.51
 3 1 -18 2.23 2.43
 3 -1 -17 5.27 2.84
 -3 1 17 6.15 2.7
 -3 -1 17 17.04 12.51
 3 1 -17 6.05 3.44
 3 -1 -16 -0.29 1.61
 -3 -1 16 1.45 0.71
 -3 1 16 0.31 1.09
 3 1 -16 1.04 1.56
 3 -1 -15 2.38 1.39
 -3 1 15 1.36 1
 -3 -1 15 1.11 1.52
 3 1 -15 0.83 0.97
 -3 -1 14 8.73 2.82
 -3 1 14 8.02 2.38
 -3 -1 13 474.52 23.36
 -3 1 13 452.01 22.39
 -3 -1 12 1549.72 52.43
 3 1 -12 1517.06 54.71
 3 -1 -12 1628.97 54.87
 3 -1 -11 155.15 11.47
 3 1 -11 155.34 11.79
 -3 -1 11 154.43 10.73
 -3 1 11 146.9 10.21
 -3 1 10 1553.07 53.36
 3 -1 -10 2040.48 65.57
 3 1 -10 2044.45 66.3
 -3 -1 10 1664.24 54.54
 3 1 -10 1630.54 56.44
 3 -1 -10 1683.74 55.26
 3 -1 -9 178.95 10.4
 3 -1 -9 208.88 14.93
 3 1 -9 214.85 15.35
 -3 1 9 158.22 9.43
 3 1 -9 170.73 10.94
 3 -1 -8 717.98 30.26
 3 1 -8 712.4 30.48
 -3 1 8 586.79 22.33
 3 1 -8 622.12 24.18
 3 -1 -8 741.88 25.02
 -3 1 7 276.7 10.95
 3 -1 -7 306.89 16.91
 3 1 -7 264.64 11.64
 3 1 -7 286.28 12.2
 3 -1 -6 11.49 1.66
 -3 1 6 13.1 1.38
 3 -1 -6 9.68 2.45
 3 1 -6 13.73 3.1
 3 1 -6 12.87 1.84
 3 1 -6 14.13 1.86
 3 1 -5 23.16 1.87
 3 -1 -5 23.28 1.83
 3 -1 -5 23.42 3.97
 3 1 -5 27.9 4.32
 3 1 -5 24.83 2.12
 3 -1 -4 38.97 4.94
 3 1 -4 34.27 4.76
 3 -1 -3 152.21 10.13
 3 1 -3 134.83 9.6
 3 -1 -2 48.39 5.48
 3 1 -2 50.11 5.52
 3 1 -2 58.29 3.41
 3 -1 -1 34.85 4.61
 3 1 -1 41.12 4.99
 3 1 -1 41.39 3.2
 -3 1 1 34.7 2.3
 -3 -1 0 45.32 2.67
 -3 1 0 44 2.67
 3 -1 0 46.18 3.24
 3 1 0 55.78 4.34
 -3 1 0 53.55 3.83
 -3 -1 -1 219.73 9.36
 -3 -1 -1 228.92 10.41
 3 -1 1 231.27 10.28
 -3 1 -1 239.62 9.59
 3 1 1 250.43 11.64
 -3 1 -1 250.65 11.36
 3 -1 2 101.65 6.76
 3 1 2 103.95 7.55
 -3 1 -2 113.48 7.89
 -3 -1 -2 103.16 7.43
 3 -1 3 33.73 4.06
 3 1 3 34.78 4.5
 -3 1 -3 33.65 4.52
 -3 -1 -3 34.23 4.32
 -3 -1 -4 3.82 1.49
 3 1 4 3.98 1.64
 3 -1 4 5.08 1.75
 -3 1 -4 5.28 1.99
 3 1 5 98.84 8.94
 3 -1 5 103.2 8.56
 -3 1 -5 106.79 9.77
 -3 -1 -5 99.92 8.93
 3 -1 6 141.46 10.8
 3 1 6 145.27 11.47
 -3 1 -6 157.77 12.79
 -3 -1 -6 145.69 11.62
 -3 -1 -7 25.83 4.87
 3 1 7 30.48 5.22
 -3 1 -7 35.44 6.11
 3 -1 7 25.67 4.64
 -3 -1 -8 9.04 3.21
 -3 1 -8 8.26 3.12
 3 -1 8 6.14 2.38
 3 1 8 9.7 3.17
 3 1 9 58.19 7.82
 3 -1 9 51.33 7.22
 -3 1 -9 68.14 9.42
 -3 -1 -9 58.38 8.49
 3 -1 10 256.72 17.59
 3 1 10 229.74 16.97
 -3 1 -10 277.01 20.88
 -3 -1 -10 255.04 19.37
 -3 1 -11 759.07 39.61
 -3 -1 -11 741.55 38.03
 -3 1 -12 293.52 23.57
 -3 -1 -12 269.73 21.76
 -3 -1 -13 15.51 5.54
 -3 1 -13 28.09 7.14
 -3 1 -14 55.62 10.4
 -3 -1 -14 62.3 10.67
 -3 -1 -15 24.99 6.86
 -3 1 -15 26.51 7.37
 -3 -1 -16 22.3 6.51
 -3 1 -16 15.95 5.58
 -3 -1 -17 6.91 3.5
 -3 1 -17 5.6 3.77
 -3 -1 -18 6.84 3.95
 -3 1 -18 12.74 6.24
 -3 -1 -19 5.33 4.43
 -3 1 -19 3.97 3.97
 -3 1 -20 19.33 6.94
 -3 -1 -20 10.59 5.38
 -3 1 -21 12.5 5.65
 -3 -1 -21 14.55 6.79
 3 2 -24 10.88 5.23
 3 -2 -24 12.8 6.49
 3 2 -23 15.99 6.01
 3 -2 -23 12.43 5.3
 3 2 -22 0.61 1.69
 3 -2 -22 8.55 5.64
 3 -2 -21 25.52 6.95
 3 2 -21 28.28 7.74
 3 -2 -20 -0.25 1.93
 -3 2 20 4.71 5.27
 -3 -2 20 4.86 5.28
 3 2 -20 3.58 2.85
 3 2 -19 56.78 10.15
 -3 -2 19 45.51 11.44
 3 -2 -19 56.55 9.89
 -3 2 19 42.42 11.62
 3 -2 -18 3.79 3.55
 -3 2 18 22.31 10.13
 -3 -2 18 19.66 9.42
 3 2 -18 2.9 2.5
 3 -2 -17 9.15 3.43
 -3 2 17 4.83 2.52
 -3 2 17 19.26 11.84
 -3 -2 17 10.24 8.59
 3 2 -17 10.49 4.07
 -3 2 16 36.43 6.08
 -3 -2 16 39.95 6.69
 3 2 -16 48.52 8.29
 3 -2 -16 44.27 7.67
 3 -2 -15 -0.56 1.2
 -3 2 15 1.07 1.27
 -3 -2 15 0.9 0.57
 3 2 -15 1.58 2.02
 -3 2 14 48.78 6.47
 -3 -2 14 56.57 7.47
 3 2 -14 52.12 7.89
 -3 2 13 207.74 13.91
 -3 -2 13 238.87 15.56
 3 -2 -12 5.83 2.03
 -3 2 12 6.66 2.06
 -3 -2 12 5.24 1.54
 -3 2 11 32.51 4.53
 3 2 -11 39.5 5.56
 3 2 -10 76.77 7.42
 3 -2 -10 93.42 10.27
 -3 2 10 70.83 6.42
 3 2 -10 75.38 7.03
 3 -2 -10 82.57 7.38
 -3 2 9 45.25 4.61
 3 -2 -9 62.14 7.78
 3 2 -9 54.36 7.5
 3 2 -9 46 5.31
 3 2 -9 50.06 5.23
 3 2 -8 1.52 0.96
 3 -2 -8 1.64 0.82
 3 -2 -8 1.77 0.97
 3 2 -8 2.95 2.01
 -3 2 8 2.87 1.04
 3 2 -8 1.01 0.7
 3 -2 -7 275.29 11.65
 3 -2 -7 300.12 16.36
 3 2 -7 323.92 17.02
 -3 2 7 255.17 10.5
 3 2 -7 265.4 11.65
 -3 2 7 75.47 16.65
 3 2 -7 276.93 11.72
 3 -2 -6 167.35 7.71
 3 2 -6 159.84 7.97
 3 2 -6 157.43 7.67
 3 -2 -6 165.76 11.53
 3 2 -6 183.2 12.27
 -3 -2 6 93.38 15.02
 -3 2 6 156.69 6.91
 -3 2 6 113.58 13.32
 3 -2 -5 163.27 11.15
 3 2 -5 161.43 11.18
 3 -2 -5 163.03 6.63
 3 2 -5 140.37 7.02
 -3 2 5 133.6 10.71
 3 2 -5 160.21 6.88
 3 -2 -4 136.33 9.69
 3 2 -4 141.31 10.13
 3 2 -4 131.78 5.57
 -3 2 4 126.8 8.84
 3 2 -4 120.65 5.93
 3 -2 -4 131.02 5.4
 3 -2 -3 624.4 19.06
 3 2 -3 646.23 19.45
 3 -2 -3 648.06 25.58
 3 2 -3 660.55 25.85
 -3 2 3 575.94 23.61
 3 -2 -2 182.24 11.19
 3 2 -2 196.79 11.61
 -3 2 2 170.83 10.15
 -3 -2 2 170.77 6.69
 3 2 -2 196.29 8.71
 -3 2 2 168.64 6.43
 3 2 -1 100.82 8.18
 -3 2 1 104.17 7.71
 -3 2 1 105.74 4.46
 -3 2 1 124.93 5.87
 3 2 -1 121.4 6.86
 -3 -2 1 98.17 4.55
 -3 2 0 184.85 10.84
 -3 -2 0 168.98 7.06
 -3 2 0 206.91 9.26
 3 2 0 189 9.91
 -3 2 0 174.72 7.13
 -3 2 -1 30.75 2.89
 -3 -2 -1 31.9 2.9
 -3 2 -1 32.91 4.32
 3 -2 1 34.63 3.36
 -3 2 -1 41.8 4.14
 3 2 1 37.29 4.34
 -3 -2 -2 260.31 11.82
 -3 2 -2 276.22 14.78
 -3 2 -2 265.17 11.96
 3 -2 2 272.48 12.58
 -3 2 -2 303.66 14.24
 3 2 2 296.31 14.83
 -3 -2 -3 300.53 15.22
 3 -2 3 271.04 13.67
 -3 2 -3 321.85 16.02
 3 2 3 314.4 16.49
 -3 2 -3 299.64 13.83
 -3 2 -4 58.51 6.61
 3 -2 4 59.95 5.98
 3 2 4 75.7 7.48
 -3 -2 -4 70.7 7.39
 3 -2 5 378.71 18.48
 -3 2 -5 392.38 20.42
 3 2 5 365.17 19.58
 -3 -2 -5 375.31 19.47
 -3 -2 -6 1.27 1.45
 3 -2 6 2.86 1.6
 3 2 6 3.57 1.88
 -3 2 -6 0.06 0.51
 -3 -2 -7 3.15 1.74
 3 -2 7 4.37 2.03
 3 2 7 3.48 1.81
 -3 2 -7 2.74 1.74
 -3 -2 -8 12.7 3.63
 3 -2 8 11.34 3.04
 3 2 8 13.15 3.74
 -3 2 -8 12.42 3.89
 -3 -2 -9 1.78 1.27
 3 2 9 1.85 0.63
 -3 2 -9 0.55 1.3
 -3 -2 -10 1.06 1.28
 3 -2 10 0.02 0.62
 3 2 10 0.97 0.74
 -3 2 -10 0.26 0.68
 -3 2 -11 199.53 18.44
 -3 -2 -11 177.71 16.99
 -3 2 -12 258.62 22.25
 -3 -2 -12 231.89 20.25
 -3 -2 -13 23.06 5.91
 -3 2 -13 22.22 6.21
 -3 2 -14 55.36 10.45
 -3 -2 -14 60.35 10.48
 -3 2 -15 131.54 17.07
 -3 -2 -15 120.5 15.77
 -3 -2 -16 37.12 8.74
 -3 2 -16 34.59 8.92
 -3 -2 -17 0.92 1.69
 -3 2 -17 0.28 2.32
 -3 -2 -18 2.33 1.8
 -3 2 -18 2.05 1.21
 -3 -2 -19 45.06 10.88
 -3 2 -19 38.13 9.95
 -3 -2 -20 0.35 3.12
 -3 2 -20 -2.68 3.35
 -3 -2 -21 6.75 4.79
 -3 2 -21 10.86 6.17
 3 3 -24 3.66 3.09
 3 3 -23 84.42 14.57
 3 -3 -23 106.87 17.33
 3 -3 -22 29.28 9.11
 3 3 -22 21.72 7.16
 3 -3 -21 27.45 8.05
 3 3 -21 14.91 5.4
 3 -3 -20 1.6 2.37
 3 3 -20 2.77 3.16
 -3 -3 20 1.82 3.11
 -3 3 20 9.34 5.73
 3 -3 -19 5.81 2.35
 3 3 -19 6.45 3.21
 -3 3 19 16.46 7.89
 -3 -3 19 16.15 7.46
 3 3 -18 35.01 7.92
 -3 3 18 29.74 10.63
 -3 -3 18 35.95 10.92
 3 -3 -18 63.43 11.68
 3 3 -17 60.15 9.97
 -3 3 17 31.6 13.6
 -3 -3 17 31.6 11.49
 -3 3 16 27.7 5.32
 3 -3 -16 50.29 9.08
 -3 -3 16 34.76 6.53
 -3 -3 16 29.66 16.53
 3 3 -16 34.4 6.75
 3 -3 -15 6.99 3.1
 3 3 -15 4.69 1.85
 -3 3 15 4.38 2.1
 3 3 -15 6.99 3.48
 -3 3 14 76.32 8.28
 3 3 -14 82.06 9.86
 3 3 -14 94.51 9.74
 -3 3 13 100.6 9.26
 3 3 -13 110.37 10.18
 3 -3 -12 41.79 5.85
 -3 3 12 29.2 4.61
 3 3 -12 32.6 5.29
 3 3 -11 23.52 4.11
 -3 3 11 16.75 3.32
 3 3 -11 18.54 3.79
 3 3 -10 11.27 2.64
 3 -3 -10 8.35 2.27
 3 -3 -10 11.09 3.38
 3 3 -10 12.51 3.94
 3 3 -10 10.05 2.62
 -3 3 10 8.55 2.08
 3 -3 -9 29.71 4.22
 3 -3 -9 37.93 5.98
 3 3 -9 37.17 6.14
 3 3 -9 26.66 4.02
 -3 3 9 26.32 3.65
 3 3 -9 29.25 4.23
 3 -3 -8 46.43 4.85
 3 -3 -8 59.31 7
 3 3 -8 58.27 7.32
 3 3 -8 47.11 4.89
 3 3 -8 44.56 4.76
 -3 3 8 41.2 4.32
 -3 3 7 15.26 2.36
 3 -3 -7 18.66 2.6
 3 3 -7 16.73 2.59
 3 -3 -7 20.55 3.94
 3 3 -7 16.16 2.55
 3 3 -7 21.83 4.17
 3 3 -6 0.29 0.29
 3 -3 -6 0.68 0.49
 3 3 -6 0.58 1.06
 3 -3 -6 0.92 0.48
 3 3 -6 3.86 1.29
 -3 -3 6 1.47 2.14
 -3 3 6 1.68 0.83
 3 3 -5 110.08 5.99
 3 -3 -5 115.51 9.06
 3 3 -5 120.9 9.54
 3 -3 -5 112.34 5.82
 -3 3 5 97.21 8.87
 3 3 -5 92.39 5.99
 -3 3 5 98.21 5.59
 3 -3 -4 50.98 5.69
 3 3 -4 52.96 5.94
 3 3 -4 53.68 3.72
 -3 3 4 48.38 5.23
 3 -3 -4 52.44 3.54
 -3 3 4 46.85 3.3
 3 3 -3 862.27 26.69
 3 -3 -3 833.31 31.31
 3 3 -3 847.98 31.9
 -3 -3 3 789.97 26.25
 -3 3 3 764.49 29.67
 3 -3 -3 853.38 26.27
 -3 3 3 930.35 26.43
 3 3 -2 324.45 12.37
 -3 3 2 278.81 10.96
 3 -3 -2 303.72 15.61
 3 3 -2 314.09 15.66
 3 -3 -2 331.59 12.03
 -3 3 2 278.72 14.26
 -3 3 2 360.47 12.36
 -3 -3 2 279.14 11.11
 -3 -3 1 4.23 0.95
 3 3 -1 7.23 1.78
 3 3 -1 4.19 1.45
 -3 3 1 5.75 1.32
 -3 3 1 4.28 1.46
 -3 3 1 5.51 0.98
 -3 3 0 173.54 10.76
 -3 -3 0 169.86 7.8
 -3 3 0 210.05 10.05
 -3 3 0 188.54 8.02
 3 3 0 194.15 10.81
 -3 3 -1 653.4 22.51
 -3 3 -1 683.05 26.47
 -3 -3 -1 647.01 22.31
 3 3 1 690.32 26.16
 -3 3 -2 880.66 30.18
 -3 -3 -2 756.15 26.64
 -3 3 -2 784.03 30.42
 -3 3 -2 782.75 27
 3 3 2 799.61 30.47
 -3 3 -3 15.21 2.81
 -3 -3 -3 21.02 3.19
 3 -3 3 14.89 2.87
 -3 3 -3 22.73 3.85
 3 3 3 14.86 3.38
 -3 -3 -4 35.95 4.79
 3 -3 4 38.31 4.76
 -3 3 -4 40.38 4.78
 -3 3 -4 38 5.34
 3 3 4 33.62 5.2
 -3 -3 -4 33.98 4.37
 -3 3 -5 65.64 6.67
 -3 -3 -5 63.99 7.28
 3 -3 5 66.27 6.79
 -3 3 -5 78.21 8.34
 3 3 5 66.34 7.81
 3 -3 6 28.66 4.64
 -3 3 -6 38.36 6.11
 3 3 6 28.15 5.3
 -3 -3 -6 40.17 6.66
 -3 3 -7 183.98 14.65
 3 3 7 159.54 13.37
 3 -3 7 165.98 12.41
 -3 -3 -7 189.43 14.71
 3 3 8 21.27 4.89
 -3 -3 -8 23.21 4.98
 3 -3 8 21.08 4.32
 -3 3 -8 28.73 5.65
 3 -3 9 45.42 6.73
 -3 3 -9 54.16 8.47
 3 3 9 51.84 7.78
 -3 -3 -9 48.09 7.79
 3 3 10 325.67 21.87
 3 -3 10 331.52 20.98
 -3 3 -10 392.32 25.14
 -3 -3 -10 379.6 24.18
 -3 3 -11 92.25 11.88
 -3 -3 -11 87.77 11.54
 -3 3 -12 590.28 34.7
 -3 -3 -12 553.92 33
 -3 3 -13 83.44 12.74
 -3 -3 -13 103.56 13.31
 -3 3 -14 192.41 20.16
 -3 -3 -14 206.85 20.16
 -3 -3 -15 4.74 2.4
 -3 3 -15 1.57 2.61
 -3 -3 -16 20.04 6.65
 -3 3 -16 8.39 4.16
 -3 -3 -17 1.91 2.76
 -3 3 -17 -0.2 2.22
 -3 -3 -18 8.11 4.69
 -3 3 -18 8.67 4.38
 -3 -3 -19 46.04 10.72
 -3 3 -19 56.24 12.7
 -3 -3 -20 6 4.1
 -3 3 -20 1.99 1.61
 -3 -3 -21 5.5 1.72
 -3 3 -21 4.15 3.96
 3 4 -24 -3.16 3.94
 3 -4 -23 13.47 5.48
 3 4 -23 19.78 6.97
 3 -4 -22 20.96 6.52
 3 4 -22 18.28 6.52
 3 -4 -21 1.72 3.21
 3 4 -21 0.65 1.2
 3 -4 -20 6.62 4.3
 3 4 -20 3.63 1.89
 3 -4 -19 9.67 4.18
 3 4 -19 6.39 3.12
 -3 4 19 18.07 7.79
 -3 -4 19 8.14 5.71
 3 -4 -18 17.49 5.15
 3 4 -18 16.49 5.18
 -3 4 18 19.58 9.38
 -3 -4 18 14.5 7.26
 3 -4 -17 26.07 6.15
 3 4 -17 16.49 4.98
 -3 4 17 12.73 8.66
 -3 -4 17 19.55 9.05
 3 -4 -16 123.48 12.86
 -3 4 16 100.48 10.63
 3 4 -16 119.99 13.08
 -3 4 15 68.66 8.37
 3 4 -15 89.5 10.68
 3 -4 -15 96.95 11.59
 3 4 -14 52.12 7.34
 -3 4 14 53.38 7.01
 3 4 -14 66.37 8.7
 3 -4 -14 76.18 9.56
 3 -4 -13 164.7 13.67
 3 4 -13 151.61 12.31
 3 4 -13 141.43 12.43
 -3 4 13 116.67 10.63
 3 4 -12 66.42 7.73
 -3 4 12 60.56 6.93
 3 4 -11 4.16 2.1
 -3 4 11 3.19 1.19
 3 4 -10 1.09 0.93
 3 -4 -10 5.72 2.59
 3 4 -10 2.07 1.36
 3 4 -10 5.12 2.89
 -3 4 10 1.08 0.8
 3 4 -9 6.89 2.02
 3 -4 -9 6.03 1.87
 3 -4 -9 10.2 2.99
 3 4 -9 6.34 2.71
 3 4 -9 7.59 2.19
 -3 4 9 6.19 1.86
 3 -4 -8 9.82 2.84
 3 4 -8 8.34 2.22
 3 4 -8 6.5 1.88
 3 4 -8 8.9 2.97
 -3 4 8 6.66 1.92
 3 -4 -8 7.22 1.88
 3 4 -7 3.11 1.15
 3 4 -7 5.23 1.97
 3 -4 -7 4.4 1.88
 3 4 -7 2.6 1.11
 3 -4 -7 3.53 1.22
 -3 4 7 2.72 1.06
 -3 4 6 7.82 1.71
 3 -4 -6 7.51 2.3
 3 4 -6 6.93 1.72
 3 4 -6 10.5 2.91
 3 4 -6 10.57 2.02
 -3 4 6 5.05 3.38
 3 -4 -6 8.84 1.8
 3 4 -5 11.69 2.95
 -3 4 5 7.86 1.55
 3 -4 -5 8.84 1.65
 3 4 -5 8.41 1.66
 3 -4 -5 6.52 2.11
 -3 4 5 5.86 2.34
 3 4 -5 7.26 1.7
 -3 4 4 9.16 1.61
 -3 -4 4 5.27 1.35
 3 -4 -4 9.33 2.44
 3 4 -4 6.64 2.03
 3 -4 -4 7.52 1.55
 -3 4 4 10.47 2.38
 3 4 -4 9.66 1.69
 -3 4 3 28.66 3.02
 3 4 -3 33.51 3.37
 3 -4 -3 31.84 4.37
 3 4 -3 37.24 4.78
 3 -4 -3 30.65 3.14
 -3 4 3 34.42 4.26
 -3 -4 3 28.61 3.07
 3 4 -2 84.66 5.81
 -3 4 2 79.22 5.1
 3 -4 -2 77.99 7.11
 3 4 -2 82.89 7.3
 -3 -4 2 64.78 4.78
 -3 4 2 82.06 6.76
 -3 4 2 96.63 6.15
 3 -4 -2 91.05 5.89
 3 4 -1 420.64 16.83
 3 4 -1 408.77 19
 -3 4 1 383.83 17.66
 -3 4 1 380.32 14.51
 3 -4 -1 433.21 16.41
 -3 4 1 471.36 17.25
 -3 -4 1 375.6 14.58
 -3 4 0 861.95 31.97
 -3 -4 0 817.44 28.02
 -3 4 0 859.09 28.28
 -3 4 -1 267.29 14.11
 -3 -4 -1 242.72 11.24
 3 4 1 284.07 15
 -3 4 -1 257.09 11.53
 -3 -4 -2 34.74 3.76
 -3 4 -2 33.86 4.59
 -3 4 -2 32 3.67
 -3 4 -2 42.21 5.03
 3 4 2 44.34 5.58
 3 4 3 8.94 2.47
 -3 4 -3 10.79 2.29
 -3 4 -3 11.32 2.6
 -3 -4 -3 11.03 2.22
 -3 4 -3 11.06 2.76
 3 4 4 15.48 3.61
 -3 -4 -4 18.38 3.15
 -3 4 -4 20.81 3.97
 -3 4 -4 22.1 3.63
 -3 -4 -5 74.3 7.19
 -3 4 -5 75.32 7.4
 -3 4 -5 78.05 8.37
 3 -4 5 78.86 7.5
 3 4 5 81.95 8.85
 3 -4 6 1.5 0.33
 -3 -4 -6 2.81 1.79
 -3 -4 -6 2.33 1.04
 -3 4 -6 2.92 1.23
 -3 4 -6 3.1 1.57
 3 4 6 2.76 1.36
 -3 -4 -7 16.05 4
 3 4 7 14.12 3.92
 3 -4 7 16.41 3.74
 -3 4 -7 14.9 3.49
 -3 4 -7 15.62 4
 3 -4 8 27.17 5.15
 -3 4 -8 32.46 6.17
 -3 4 -8 28.03 5.2
 3 4 8 24.62 5.44
 -3 -4 -8 33.69 6.3
 3 -4 9 57.56 7.75
 -3 4 -9 71 9.91
 3 4 9 57.05 8.43
 -3 -4 -9 67.74 10.37
 -3 4 -10 53.13 8.89
 -3 -4 -10 61.5 9.65
 -3 4 -11 103.46 12.73
 -3 -4 -11 88.41 11.8
 -3 4 -12 72.32 10.93
 -3 -4 -12 61.25 9.78
 -3 -4 -13 6.47 3.35
 -3 4 -13 10.36 4.69
 -3 -4 -14 2.38 2.81
 -3 4 -14 -0.95 1.81
 -3 -4 -15 16.06 5.32
 -3 4 -15 21.53 6.61
 -3 -4 -16 49.97 10.42
 -3 4 -16 55.89 11.23
 -3 -4 -17 4.9 2.67
 -3 4 -17 1.31 1.16
 -3 -4 -18 3.51 2.64
 -3 4 -18 1.59 2.39
 -3 -4 -19 -1.97 3.33
 -3 4 -19 -0.85 1.85
 -3 -4 -20 3.79 4.81
 -3 4 -20 -0.24 1.12
 -3 4 -21 22.21 8.46
 3 -5 -24 51.24 11.51
 3 5 -24 59.29 12.74
 3 -5 -23 4.46 3.63
 3 5 -23 4.17 2.4
 3 -5 -22 2.15 1.63
 3 5 -22 1.41 1.79
 3 -5 -21 21.02 6.96
 3 5 -21 36.8 8.83
 3 -5 -20 -0.25 1.59
 3 5 -20 1.2 2.31
 -3 5 20 5.17 4.98
 3 -5 -19 -4.5 2.8
 3 5 -19 -0.9 0.71
 -3 -5 19 1.69 2.97
 3 -5 -18 7.21 3.47
 3 5 -18 8.77 3.44
 -3 5 18 9.73 6.49
 -3 -5 18 12.12 6.45
 3 5 -17 95.5 12.14
 -3 -5 17 63.93 13.48
 -3 5 17 57.3 16.25
 3 -5 -16 0.06 1.59
 3 5 -16 1.57 0.94
 -3 5 16 10.46 8.96
 -3 -5 16 7.7 7.06
 3 -5 -15 102.41 11.77
 3 5 -15 97.04 11.08
 -3 5 15 78.67 9.3
 3 -5 -14 32.02 5.99
 3 5 -14 32.19 5.85
 -3 5 14 21.93 4.66
 3 5 -14 31.16 5.63
 3 -5 -13 218.93 15.85
 3 5 -13 184 14.22
 -3 5 13 161.45 12.95
 3 5 -13 193.13 14.51
 3 -5 -12 104.81 10.13
 3 5 -12 96.15 9.5
 -3 5 12 89.44 8.96
 3 5 -12 102.77 9.84
 3 5 -11 3.29 1.71
 -3 5 11 3.18 1.47
 3 -5 -10 60.33 7.75
 3 5 -10 67.95 9.09
 3 5 -10 48.98 6.12
 -3 5 10 46.01 5.98
 3 5 -9 0.12 0.6
 3 -5 -9 -0.44 0.89
 -3 5 9 0.07 0.49
 3 5 -8 178.4 11.02
 3 -5 -8 188.23 10.98
 3 -5 -8 177.89 12.68
 3 5 -8 202.01 14.2
 3 5 -8 144.94 10.09
 -3 5 8 135.81 9.85
 3 -5 -7 46.89 5.99
 3 -5 -7 48.65 4.87
 3 5 -7 56.37 6.9
 3 5 -7 41.48 4.81
 -3 5 7 36.85 4.4
 3 5 -7 49.91 5.1
 -3 5 6 2.73 1.14
 3 -5 -6 4.41 1.29
 3 -5 -6 5.35 1.87
 3 5 -6 4.97 1.53
 3 5 -6 2.57 1.22
 3 5 -6 2.39 0.78
 -3 5 6 6.96 4.3
 -3 5 5 48.49 7
 3 -5 -5 60.8 6.39
 3 5 -5 67.31 7.1
 3 5 -5 66.39 5.45
 3 -5 -5 61.1 5.08
 -3 -5 5 53.29 5.13
 -3 5 5 52.67 5.02
 -3 5 4 472.43 19.69
 -3 -5 4 456 19.42
 3 -5 -4 514.2 22.26
 3 5 -4 607.4 24.11
 3 5 -4 552.42 20.02
 -3 5 4 492.6 21.54
 3 -5 -4 553.39 19.83
 -3 5 3 115.67 7.28
 3 -5 -3 114.38 8.71
 3 -5 -3 117.56 7.49
 3 5 -3 134.33 9.52
 3 5 -3 129.28 7.9
 -3 5 3 125.04 8.66
 -3 -5 3 112.58 7.21
 3 5 -2 241.21 11.98
 3 -5 -2 214.91 12.8
 -3 5 2 222.82 10.65
 3 5 -2 250.32 13.65
 -3 -5 2 207.44 10.43
 -3 5 2 222.55 12.18
 3 -5 -2 262.56 12.05
 3 -5 -1 21.48 3.12
 3 5 -1 22.63 3.31
 -3 5 1 18.09 3.14
 -3 5 1 21.41 2.7
 -3 5 1 27.33 3.67
 -3 -5 1 18.89 2.57
 3 5 0 21.49 3.75
 -3 -5 0 15.18 2.34
 -3 5 0 17.88 3.18
 -3 5 0 23.34 3.64
 -3 5 0 17.6 2.5
 3 -5 0 19.05 3
 3 5 0 17.05 3.06
 -3 5 -1 191.23 11.62
 -3 5 -1 215.65 12.44
 -3 -5 -1 181.36 9.61
 -3 5 -1 181.53 9.88
 -3 5 -2 53.77 5.06
 -3 5 -2 59.7 6.2
 -3 -5 -2 56.29 5.05
 -3 5 -2 65.69 6.75
 3 5 2 61.61 7.05
 3 5 3 12.15 3.14
 -3 5 -3 10.82 2.69
 -3 5 -3 14.64 3.36
 -3 5 -3 10.03 2.2
 -3 -5 -3 6.89 1.8
 3 5 4 19.4 4.15
 -3 -5 -4 14.52 2.99
 -3 5 -4 20.3 3.54
 -3 5 -4 21.63 4.28
 3 5 5 0.97 1.17
 -3 5 -5 1.07 0.94
 -3 -5 -5 0.3 0.2
 -3 5 -5 1.19 1.17
 -3 -5 -6 1.28 1.14
 -3 5 -6 4.27 2.05
 -3 5 -6 1.55 1.32
 3 5 6 2.07 1.7
 -3 5 -7 28.7 4.93
 -3 -5 -7 20.9 4.23
 3 -5 7 25.31 4.74
 -3 5 -7 29.57 5.62
 3 5 7 22.26 5.18
 3 -5 8 16.44 4
 -3 -5 -8 16.75 3.92
 -3 5 -8 12.67 3.42
 -3 5 -8 14.47 4.49
 3 5 8 8.98 3.44
 -3 -5 -9 36.24 6.42
 -3 5 -9 42.8 7.69
 3 -5 9 38.11 6.33
 -3 5 -9 36.98 6.29
 -3 -5 -9 35.06 6.26
 -3 -5 -10 104.15 12.03
 -3 5 -10 105.22 12.62
 -3 -5 -11 18.15 5.22
 -3 5 -11 12.55 4.25
 -3 -5 -12 4.88 2.33
 -3 5 -12 2.02 2.49
 -3 5 -13 218.29 20.89
 -3 -5 -13 237.28 22.66
 -3 -5 -14 2.44 2.86
 -3 5 -14 0.91 2.79
 -3 5 -15 68.5 12.47
 -3 -5 -15 104.23 16.51
 -3 5 -16 79.89 13.65
 -3 -5 -16 103.42 16.99
 -3 -5 -17 24.69 9.27
 -3 5 -17 12.89 5.87
 -3 -5 -18 58.61 13.81
 -3 5 -18 47.7 11.43
 -3 -5 -19 6.14 5.01
 -3 5 -19 5.25 3.89
 -3 -5 -20 1.87 3.18
 -3 5 -20 1.64 3.4
 3 -6 -24 1.16 3.04
 3 -6 -23 5.5 3.19
 3 6 -23 5.95 3.89
 3 -6 -22 1.51 0.72
 3 6 -22 3.51 2.78
 3 -6 -21 20.53 6.38
 3 6 -21 23.72 7.14
 3 -6 -20 17.95 6.55
 3 6 -20 24.85 6.82
 3 -6 -19 9.74 4.31
 3 6 -19 5.02 3.32
 -3 6 19 7.51 6.56
 3 -6 -18 13.46 4.72
 3 6 -18 6.2 2.86
 -3 6 18 18.84 8.51
 -3 -6 18 11.03 6.41
 3 6 -17 16.26 5
 3 -6 -17 18.77 5.19
 -3 6 17 21.74 9.6
 -3 -6 17 19.79 7.85
 3 -6 -16 32.54 6.8
 3 6 -16 20.56 5.1
 -3 6 16 14.39 9.03
 -3 -6 16 19.02 8.21
 3 6 -15 55.28 8.3
 -3 6 15 53.91 7.82
 -3 -6 15 37.5 13.9
 3 -6 -14 34.47 6.26
 3 6 -14 22.26 4.8
 -3 6 14 18.78 4.32
 3 6 -13 147.49 13.04
 3 6 -13 155.77 13.02
 -3 6 13 126.63 11.76
 3 6 -12 306.61 18.63
 3 6 -12 261.98 17.29
 -3 6 12 273.84 18.07
 3 6 -11 21.47 4.23
 3 -6 -11 26.1 4.67
 3 6 -11 23.15 4.35
 -3 6 11 21.73 4.33
 3 6 -10 93.82 8.81
 3 -6 -10 116.71 10.6
 3 6 -10 87.21 8.55
 -3 6 10 91.1 8.8
 -3 6 9 6.22 2.02
 3 6 -9 8.39 2.53
 3 -6 -9 8.09 2.9
 3 6 -9 9.17 3.05
 -3 6 8 14.41 3.07
 3 6 -8 27.24 4.88
 3 -6 -8 19.58 3.78
 3 6 -8 20.75 3.62
 3 -6 -7 163.64 10.13
 3 -6 -7 163.98 11.73
 3 6 -7 179.23 12.87
 -3 6 7 133.73 9.81
 3 6 -7 167.46 10.6
 3 6 -6 16.53 3.71
 -3 6 6 14.13 3.1
 3 -6 -6 11.29 2.35
 3 6 -6 11.96 2.54
 3 -6 -6 12.83 3.06
 -3 6 6 10.78 5.35
 3 -6 -5 39.11 5.02
 3 6 -5 44.58 5.73
 3 6 -5 43.78 4.72
 -3 -6 5 34.65 4.39
 3 -6 -5 44.35 4.65
 -3 6 5 29.74 5.44
 -3 6 4 32.06 4.1
 3 -6 -4 34.84 4.64
 3 6 -4 43.91 5.41
 3 6 -4 40.29 4.51
 -3 6 4 27.07 4.14
 -3 -6 4 32.51 4.07
 3 -6 -4 38.73 4.29
 -3 6 3 232.52 12.23
 3 -6 -3 243.77 13.77
 3 -6 -3 266.3 12.98
 3 6 -3 264.11 14.42
 3 6 -3 269.9 13.23
 -3 6 3 243.96 13.14
 -3 -6 3 226.37 11.98
 3 -6 -2 11.22 2.38
 -3 -6 2 10.37 2.07
 3 6 -2 10.1 2.53
 3 6 -2 12.71 2.52
 -3 6 2 11.96 2.42
 -3 6 2 9.44 1.95
 3 6 -1 249.67 13.35
 -3 6 1 223.52 12.45
 -3 6 1 226.37 11.33
 3 -6 -1 252.05 13.18
 -3 -6 1 217.13 11.18
 -3 6 0 8.46 1.97
 3 6 0 9.26 2.44
 3 -6 0 12.11 2.69
 -3 -6 0 8.22 1.88
 -3 6 0 8.16 2.27
 -3 6 0 10.89 2.72
 3 6 1 548.96 24.95
 -3 6 -1 496.28 21.71
 -3 -6 -1 480.21 19.74
 -3 6 -1 581.94 24.27
 -3 6 -1 495.96 20.19
 3 -6 1 526.67 22.47
 -3 6 -2 195.89 12.26
 -3 -6 -2 186.06 10.64
 -3 6 -2 226.01 14.09
 -3 6 -2 187.72 11.03
 -3 6 -3 163.61 10.43
 -3 6 -3 155.25 11.27
 -3 -6 -3 141.49 9.57
 -3 6 -3 186.39 13.07
 3 6 3 158.77 12.79
 3 6 4 19.11 4.28
 -3 -6 -4 22.93 3.67
 -3 6 -4 25.78 5.01
 -3 6 -4 18.04 3.37
 -3 6 -5 200.55 14.63
 -3 -6 -5 160.87 11.4
 -3 6 -5 177.49 12.26
 3 6 5 164.74 13.78
 3 6 6 1.76 0.78
 -3 6 -6 2.11 1.47
 -3 6 -6 4.47 2.55
 -3 -6 -6 3.77 1.74
 3 6 7 0.14 0.8
 -3 -6 -7 0.22 0.97
 -3 6 -7 0.88 1.3
 -3 6 -7 1.84 1.74
 -3 6 -8 61.43 8.02
 -3 -6 -8 65.5 8.01
 3 6 8 52.63 8.36
 -3 6 -8 66.26 9.28
 -3 -6 -9 148.42 13.13
 -3 6 -9 125.67 13.4
 -3 -6 -10 5.76 2.27
 -3 6 -10 9.53 3.41
 -3 -6 -11 111.68 12.49
 -3 6 -11 120.06 14.11
 -3 -6 -12 161.38 16.08
 -3 6 -12 197.7 19.06
 -3 -6 -12 156.59 15.62
 -3 -6 -13 23.22 6.46
 -3 -6 -13 22.89 6
 -3 6 -13 28.58 7.49
 -3 -6 -14 5.25 3.3
 -3 -6 -14 7.08 3.06
 -3 6 -14 6.7 3.91
 -3 -6 -15 0.93 1.19
 -3 6 -15 2.29 1.59
 -3 -6 -16 2.05 1.54
 -3 6 -16 6.12 3.85
 -3 -6 -17 5.15 3.87
 -3 6 -17 4.74 2.39
 -3 -6 -18 6.19 4.47
 -3 6 -18 0.27 0.86
 -3 -6 -19 2.33 2.14
 -3 6 -19 0.11 1.19
 -3 -6 -20 37.35 9.96
 -3 6 -20 31.71 9.74
 3 -7 -23 6.05 1.97
 3 7 -23 4.84 3.58
 3 -7 -22 -1.11 2.96
 3 7 -22 0.06 0.95
 3 -7 -21 1.08 2.04
 3 7 -21 4.4 3.24
 3 -7 -20 9.93 4.34
 3 7 -20 14.52 5.14
 3 -7 -19 8.15 4.04
 3 7 -19 2.68 2.36
 3 -7 -18 7.15 2.74
 3 7 -18 7.92 3.82
 -3 7 18 12.63 7.69
 -3 -7 18 11.89 5.92
 3 -7 -17 49.2 8.74
 3 7 -17 31.7 6.61
 -3 7 17 35.8 11.39
 -3 -7 17 37.79 9.83
 3 -7 -16 23.38 6.2
 3 7 -16 24.18 5.73
 -3 7 16 18.97 9.6
 -3 -7 16 23.83 8.39
 3 -7 -15 191.5 16.31
 3 7 -15 140.97 13.64
 3 7 -14 53.95 7.91
 3 -7 -14 70.41 9.25
 -3 7 14 54.38 7.96
 -3 -7 14 41.95 16.33
 3 7 -13 406.15 23.25
 -3 7 13 351.55 22.58
 3 7 -12 0.49 0.96
 3 -7 -12 1.31 1.37
 3 7 -12 0.45 0.84
 -3 7 12 -0.07 0.3
 3 7 -11 5.91 2.12
 3 7 -11 3.2 1.47
 -3 7 11 1.71 0.91
 3 -7 -11 4.37 1.71
 -3 7 10 -0.28 0.64
 3 7 -10 0.72 0.12
 3 -7 -10 0.57 0.78
 3 7 -10 0.89 1.01
 3 -7 -10 -1.09 1.53
 -3 7 9 7.75 2.4
 3 -7 -9 13.12 3.16
 3 7 -9 14.57 3.82
 3 -7 -9 12.91 3.19
 3 7 -9 16.6 3.46
 3 7 -9 11.12 2.88
 3 -7 -8 54.13 6.56
 3 7 -8 48.02 6.77
 3 7 -8 38.77 5.35
 3 7 -8 50.96 6.02
 -3 7 8 41.86 5.62
 3 -7 -7 97.66 8.75
 3 7 -7 102.84 9.56
 3 7 -7 104.51 8.58
 -3 7 7 88.6 8.43
 -3 7 6 44.07 5.39
 3 -7 -6 41.96 5.38
 3 7 -6 47.7 6.16
 3 7 -6 41.71 5.06
 -3 -7 6 37.75 4.98
 -3 7 5 228.31 13.5
 3 -7 -5 239.29 13.63
 -3 -7 5 212.27 12.85
 3 7 -5 288.36 15.55
 3 7 -5 259.29 13.7
 -3 7 5 163.31 16.66
 -3 7 4 138.74 9.72
 3 -7 -4 141.41 10
 3 7 -4 174.63 11.35
 3 7 -4 161.94 10.31
 -3 7 4 153.33 11.07
 -3 -7 4 131.76 9.48
 -3 7 3 132.68 9.27
 3 -7 -3 140.39 9.96
 3 7 -3 170.66 11
 3 -7 -3 152.58 9.96
 3 7 -3 158.09 10.3
 -3 -7 3 120.21 8.73
 -3 7 3 138.98 9.57
 3 7 -2 54.22 5.9
 3 7 -2 55.49 6.03
 -3 7 2 50.73 5.2
 -3 -7 2 47.98 5.02
 -3 7 2 46.22 5.03
 3 -7 -2 57.59 5.99
 -3 7 1 7.24 1.91
 3 7 -1 10.23 2.52
 -3 -7 1 5.89 1.68
 -3 7 1 8.71 2.05
 3 7 0 320.08 16.9
 -3 7 0 296.54 15.12
 -3 7 0 344.97 17.76
 -3 -7 0 268.63 13.81
 -3 7 0 294.33 14.41
 3 7 1 52.92 6.76
 -3 7 -1 40.65 5.03
 -3 7 -1 56.33 6.68
 -3 -7 -1 45.04 4.84
 -3 7 -1 54.52 5.4
 3 7 1 43.78 5.97
 3 7 2 25.38 5.24
 -3 7 -2 23.27 3.83
 -3 7 -2 29.28 4.97
 -3 -7 -2 21.68 3.36
 -3 7 -2 23.02 3.64
 -3 7 -3 324.73 17.24
 -3 -7 -3 284.73 15.14
 -3 7 -3 347.85 19.61
 3 7 3 357.14 21.38
 -3 7 -3 315.56 16.32
 -3 7 -4 61.45 7.55
 -3 7 -4 68.11 7.52
 -3 -7 -4 59.51 6.33
 -3 7 -4 69.15 8.32
 3 7 4 68.67 8.74
 3 7 5 1.5 0.88
 -3 7 -5 4.04 1.49
 -3 7 -5 5.5 2.28
 -3 -7 -5 1.89 0.71
 -3 7 -6 74.05 9.28
 -3 -7 -6 60.8 7.02
 -3 7 -6 66.5 7.73
 3 7 6 55.03 8.18
 -3 7 -7 12.07 3.29
 -3 -7 -7 14.91 3.42
 -3 7 -7 12.46 3.64
 -3 -7 -8 5.11 1.54
 -3 7 -8 7.57 2.94
 -3 -7 -9 94.07 10.29
 -3 7 -9 90.05 11.45
 -3 -7 -10 14.53 4.07
 -3 7 -10 11.22 3.93
 -3 -7 -11 10.91 3.65
 -3 7 -11 18.99 5.37
 -3 -7 -12 7.45 2.38
 -3 7 -12 7.46 3.28
 -3 -7 -13 234.17 20.1
 -3 7 -13 237.01 22
 -3 -7 -14 15.42 4.84
 -3 7 -14 16.99 5.98
 -3 -7 -15 12.33 4.88
 -3 7 -15 16.98 5.89
 -3 -7 -16 42.65 9.22
 -3 7 -16 34.65 8.84
 -3 -7 -17 125.63 16.82
 -3 7 -17 123.27 17.82
 -3 -7 -18 12.72 5.19
 -3 7 -18 23.49 8.1
 -3 -7 -19 -0.35 1.45
 -3 7 -19 3.6 2.71
 3 -8 -23 1.69 2.29
 3 8 -23 10.32 5.19
 3 -8 -22 0.54 0.8
 3 8 -22 1.43 1.46
 3 -8 -21 1.29 0.92
 3 8 -21 2.91 3.07
 3 -8 -20 -0.93 1.2
 3 8 -20 3.06 0.89
 3 -8 -19 8.94 3.82
 3 8 -19 6.37 3.62
 3 -8 -18 -0.3 0.16
 3 8 -18 1.75 1.41
 3 8 -17 75.32 10.91
 -3 8 17 66.57 14.14
 -3 -8 17 85.15 14.84
 3 -8 -16 51.81 8.65
 3 8 -16 34.92 7.03
 -3 8 16 31.46 11.51
 -3 -8 16 36.23 9.58
 3 -8 -15 1.24 1.73
 3 8 -15 0.28 0.43
 -3 8 15 5.12 6.88
 -3 -8 15 5.76 5.13
 3 -8 -14 10.46 3.53
 3 8 -14 6.44 2.7
 -3 -8 14 14.48 8.74
 3 8 -13 66.51 8.74
 -3 8 13 59.49 8.52
 -3 -8 13 40.69 16.84
 3 8 -12 185.63 14.54
 -3 8 12 148.71 13.55
 -3 8 11 20.71 4.34
 3 -8 -11 35.66 5.72
 3 8 -11 23.66 4.67
 3 -8 -10 67.32 7.87
 3 -8 -10 64.06 7.43
 3 8 -10 45.71 6.41
 -3 8 10 36.17 5.77
 3 8 -10 54.75 7
 -3 8 9 10.42 2.88
 3 -8 -9 15.74 3.69
 3 8 -9 11.62 3.07
 3 8 -9 13.66 3.62
 3 8 -9 10.4 2.77
 3 -8 -9 12.9 3.24
 3 -8 -8 289.65 15.9
 3 -8 -8 260.22 15.66
 3 8 -8 304.51 17.91
 3 8 -8 214.05 14.41
 3 8 -8 265.31 15.8
 -3 8 8 219.09 14.98
 3 -8 -7 126.94 10.05
 3 8 -7 153.67 11.78
 3 8 -7 111.49 9.72
 3 -8 -7 136.81 10.3
 3 8 -7 139.46 10.56
 -3 8 7 129.81 11.37
 3 8 -6 8.05 2.49
 3 8 -6 5.6 2.01
 3 -8 -6 3.26 1.4
 3 -8 -6 6.6 2.21
 -3 8 6 -0.19 2.02
 -3 -8 6 4.6 1.76
 -3 -8 5 3.67 1.35
 -3 8 5 3.9 1.56
 3 -8 -5 6.93 2.05
 3 8 -5 7.21 2.37
 -3 8 5 5.16 3.78
 3 8 -5 5.85 1.92
 -3 8 4 21.63 3.79
 3 -8 -4 20.36 3.65
 3 8 -4 28.95 4.32
 3 8 -4 22.35 3.9
 -3 -8 4 19.43 3.54
 -3 8 4 18.28 3.65
 -3 8 3 128.75 9.62
 3 8 -3 155.71 10.61
 3 8 -3 148.51 10.74
 -3 8 3 140.85 9.78
 -3 -8 3 124.47 9.27
 3 8 -2 132.67 10.13
 -3 8 2 118.09 8.9
 -3 -8 2 97.95 8.06
 -3 8 2 122.19 8.65
 -3 -8 1 41.03 4.84
 3 8 -1 49.49 6.17
 -3 8 1 39.22 4.85
 -3 8 1 45.77 5.04
 3 8 0 24.05 4.46
 -3 8 0 23.24 3.65
 -3 8 0 24.5 3.76
 -3 -8 0 19.71 3.35
 -3 8 -1 25.31 3.89
 3 8 1 19.69 4.15
 -3 8 -1 23.64 4.56
 -3 8 -1 23.92 3.79
 -3 -8 -1 19.25 3.34
 3 -8 2 22.13 4.31
 3 8 2 24.6 5.13
 -3 8 -2 23.28 3.84
 -3 -8 -2 17.93 3.39
 -3 8 -2 25.1 4.85
 -3 8 -2 23.91 3.84
 -3 8 -3 729.57 29.52
 -3 8 -3 778.24 33.59
 -3 8 -3 715.49 29.34
 -3 8 -4 132.97 10.52
 -3 8 -4 140.7 11.1
 -3 -8 -4 121.08 9.66
 -3 8 -4 142.37 12.74
 3 8 4 148.97 13.74
 -3 8 -5 48.06 6.31
 -3 -8 -5 42.94 5.73
 -3 8 -5 50.53 7.46
 3 8 5 42.76 7.38
 -3 -8 -6 37.22 5.04
 -3 -8 -6 33.87 5.32
 -3 8 -6 35.39 5.53
 -3 8 -6 41.84 7.16
 -3 -8 -7 353.03 20.33
 -3 8 -7 396.18 24.56
 -3 -8 -8 286.57 18.59
 -3 8 -8 335.77 23.01
 -3 -8 -9 422.95 24.51
 -3 8 -9 485.48 29.1
 -3 -8 -10 26.22 5.88
 -3 8 -10 32.6 7.11
 -3 -8 -11 56.68 8.63
 -3 8 -11 62.27 10.22
 -3 -8 -12 195.29 17.43
 -3 8 -12 210.42 20.1
 -3 -8 -13 1.46 0.35
 -3 8 -13 0.3 2.09
 -3 -8 -14 137.84 15.45
 -3 8 -14 155.32 18.07
 -3 -8 -15 4.15 2.09
 -3 8 -15 4.33 3.36
 -3 -8 -16 1.3 0.9
 -3 8 -16 1.03 1.42
 -3 -8 -17 8.91 3.8
 -3 8 -17 7.96 3.77
 -3 -8 -18 1.25 2.11
 -3 8 -18 -0.19 3.04
 -3 -8 -19 5.34 2.84
 -3 8 -19 12.06 6.02
 3 -9 -22 3.33 3.03
 3 9 -22 4.76 3.09
 3 -9 -21 44.06 9.69
 3 9 -21 36.83 8.63
 3 -9 -20 19.05 5.7
 3 9 -20 9.61 4.95
 3 -9 -19 39.36 8.58
 3 9 -19 18.38 5.72
 3 -9 -18 63 10.57
 3 9 -18 55.72 9.66
 3 -9 -17 88.29 12.05
 3 9 -17 59.44 9.64
 -3 9 17 53.57 12.16
 3 -9 -16 34.84 7.18
 3 9 -16 22.64 5.59
 -3 9 16 21.39 9.48
 -3 -9 16 17.99 6.66
 3 -9 -15 1.23 2.23
 3 9 -15 2.35 1.45
 -3 -9 15 5.55 4.77
 3 9 -14 -1.25 1.89
 3 -9 -14 -0.58 1.06
 -3 9 14 3.65 4.35
 -3 -9 14 1.01 2.6
 3 9 -13 1.07 1.31
 3 -9 -13 -1.07 1.32
 3 9 -12 2.19 1.76
 3 -9 -12 1.8 1.65
 -3 9 11 4.52 2.51
 3 9 -11 1.87 1.29
 3 -9 -11 0.23 1.37
 -3 9 10 1.18 1.39
 3 -9 -10 2.94 1.71
 3 9 -10 1.81 1.08
 3 -9 -10 0.54 1.35
 3 -9 -9 280.8 16.96
 3 -9 -9 362.68 19.14
 3 9 -9 338.81 19.8
 3 9 -9 263.07 17.18
 -3 9 9 248.58 17.25
 3 -9 -8 209.55 13.67
 3 9 -8 241.69 15.77
 3 9 -8 180.77 13.46
 3 -9 -8 232.29 14.8
 3 9 -8 234.1 15.17
 -3 9 8 186.14 14.62
 -3 -9 7 3.45 1.28
 -3 9 7 2.06 1.21
 3 9 -7 2.13 1.13
 3 -9 -7 3.44 1.32
 3 -9 -7 1.91 1.23
 3 9 -7 1.91 1.71
 3 -9 -6 70.3 7
 3 9 -6 83.9 8.18
 -3 -9 6 67.37 7.46
 3 9 -6 81.84 8.32
 3 -9 -6 80.45 8.08
 -3 9 6 53.81 7.09
 -3 9 5 0.93 0.7
 3 -9 -5 0.75 0.67
 3 9 -5 2.92 1.65
 3 -9 -5 0.23 0.98
 -3 9 5 1.93 4.31
 -3 -9 5 0.2 0.6
 3 9 -5 1.66 1.3
 3 -9 -4 122.42 9.79
 -3 9 4 99.73 9.1
 3 9 -4 121.53 9.36
 3 9 -4 116.4 9.86
 -3 9 4 79.73 10.36
 -3 -9 4 92.58 8.61
 -3 9 3 26.51 4.37
 3 9 -3 29.72 4.46
 3 9 -3 31.41 5.05
 3 -9 -3 28.56 4.61
 -3 -9 3 20.82 3.87
 -3 9 3 29.63 4.35
 3 9 -2 155 11.93
 -3 9 2 135.05 10.3
 -3 -9 2 128.8 9.87
 3 -9 -2 159.14 11.72
 -3 9 2 157.18 10.09
 -3 -9 1 22.41 3.7
 3 9 -1 29.37 5.05
 -3 9 1 23.2 3.93
 -3 9 1 29.41 4.05
 3 -9 -1 27.36 4.84
 3 9 0 511.09 25.47
 -3 9 0 519.59 21.86
 -3 9 0 514.89 22.76
 3 -9 0 541.78 25.63
 -3 -9 0 471.79 21.84
 3 9 1 42.29 6.46
 3 -9 1 42.13 6.18
 -3 9 -1 41.54 5.09
 -3 9 -1 41.56 5.44
 -3 9 -1 42.96 6.51
 -3 -9 -1 42.61 5.26
 3 9 2 105.48 11.16
 -3 9 -2 102.7 8.51
 -3 9 -2 111.1 11.02
 -3 -9 -2 98.12 8.39
 -3 9 -2 105.97 9.06
 3 -9 2 102.36 10.01
 3 9 2 102.71 10.66
 -3 -9 -3 5.74 2.22
 3 9 3 3.65 2.13
 -3 9 -3 8.55 2.52
 3 -9 3 5.84 2.35
 -3 9 -3 6.08 2.32
 -3 9 -3 3.99 2.31
 -3 9 -4 525.18 24.21
 -3 -9 -4 468.19 22.75
 -3 9 -4 559.98 28.52
 -3 9 -4 499.36 24.21
 -3 9 -5 27.6 4.92
 -3 -9 -5 24.34 4.39
 -3 9 -5 23.77 5.32
 -3 -9 -6 160.48 12.42
 -3 9 -6 186.66 16.02
 -3 -9 -7 33.79 4.91
 -3 -9 -7 35.99 5.71
 -3 9 -7 34.75 6.78
 -3 -9 -8 15.27 3.87
 -3 9 -8 20.77 5.62
 -3 -9 -9 117.77 11.92
 -3 9 -9 130.04 14.8
 -3 -9 -10 -0.36 0.38
 -3 9 -10 0.7 0.62
 -3 -9 -11 23.6 5.48
 -3 9 -11 22.99 6.35
 -3 -9 -12 200.2 17.55
 -3 9 -12 206.28 20.04
 -3 -9 -13 100.08 12.7
 -3 9 -13 87.01 13.23
 -3 -9 -14 0.69 1.64
 -3 9 -14 2.11 2.69
 -3 -9 -15 11.73 4.78
 -3 9 -15 11.37 5.01
 -3 -9 -16 0.15 1.89
 -3 9 -16 2.5 3.35
 -3 -9 -17 48.81 10.07
 -3 9 -17 54.2 12.06
 -3 -9 -18 63.99 11.98
 -3 9 -18 64.68 13.56
 3 -10 -21 19.61 6.51
 3 10 -21 11.51 4.92
 3 -10 -20 -1.12 1.35
 3 10 -20 2.23 2.41
 3 -10 -19 19.39 6.34
 3 10 -19 10.29 4.02
 3 -10 -18 26.03 7.01
 3 10 -18 10.73 4.53
 3 -10 -17 6.46 2.96
 3 10 -17 3.26 2.45
 3 10 -16 9.45 3.53
 3 -10 -16 18.85 5.31
 -3 10 16 17.2 7.68
 3 -10 -15 48.52 8.23
 3 10 -15 36.32 7.31
 -3 10 15 44.31 12.01
 -3 -10 15 41.15 9.66
 3 10 -14 -0.42 0.91
 3 -10 -14 3.25 2.31
 -3 10 14 6.28 7.13
 -3 -10 14 4.3 4.4
 3 10 -13 -0.09 0.85
 3 -10 -13 2.17 1.93
 -3 -10 13 4.23 4.8
 3 10 -12 0.65 0.67
 3 -10 -12 0.45 0.64
 3 -10 -11 3.68 2.17
 3 10 -11 2.97 1.51
 -3 -10 11 10.07 8.14
 3 -10 -10 25.85 5.02
 3 -10 -10 27 4.83
 3 10 -10 23.01 4.89
 -3 10 9 24.27 5.11
 3 -10 -9 32.19 5.08
 3 10 -9 37.59 6.05
 3 10 -9 32.23 5.71
 3 -10 -9 39.16 6
 3 -10 -8 57.16 6.57
 3 10 -8 67.03 7.8
 3 10 -8 48.53 6.92
 3 -10 -8 67.65 8.02
 -3 10 8 58.22 8.97
 -3 10 7 22.81 4.74
 3 -10 -7 25.04 4.19
 3 10 -7 30.98 5.06
 -3 -10 7 26.73 4.85
 3 -10 -7 22.01 4.44
 -3 10 6 91.14 9.79
 3 -10 -6 102.9 8.66
 3 10 -6 122.16 10.01
 -3 -10 6 98.82 9.58
 3 -10 -6 134.23 10.97
 -3 10 5 11.09 3.11
 3 10 -5 13.66 3.14
 -3 -10 5 10.11 2.93
 -3 10 5 1.97 2.32
 3 -10 -5 15.04 3.58
 3 10 -5 13.47 3.45
 -3 10 4 535.2 25.96
 3 -10 -4 644.93 27.46
 3 10 -4 613.43 25.02
 3 10 -4 617.6 27.57
 -3 -10 4 512.37 25.09
 3 10 -3 29.72 5.15
 3 -10 -3 28.5 4.83
 -3 10 3 24.44 4.47
 -3 -10 3 24.74 4.38
 -3 10 3 22.86 4.21
 3 10 -2 57.06 7.29
 -3 10 2 51.71 6.48
 -3 -10 2 48.22 5.95
 3 -10 -2 72.41 8.07
 -3 10 2 50.09 5.55
 3 10 -1 429.59 22.75
 -3 -10 1 368.37 19.02
 -3 10 1 378.06 19.74
 -3 10 1 411.73 18.16
 3 -10 -1 453.08 22.76
 3 10 0 85.68 9.59
 -3 10 0 88.74 7.36
 -3 10 0 77.7 7.95
 -3 -10 0 82.56 6.98
 3 -10 0 95.7 9.82
 -3 -10 0 76.46 7.59
 3 10 1 197.39 15.25
 3 -10 1 208.72 15.17
 -3 10 -1 210.8 12.24
 -3 -10 -1 175.05 10.01
 -3 10 -1 177.95 12.75
 -3 10 -1 192.32 15.39
 -3 -10 -1 187.71 12.65
 -3 10 -2 61.93 6.36
 -3 -10 -2 46.77 4.57
 3 -10 2 60.93 7.92
 -3 10 -2 49.43 6.38
 -3 -10 -2 51.52 6.26
 -3 10 -2 52.25 7.74
 -3 10 -3 457 21.11
 -3 -10 -3 415.77 21.21
 -3 10 -3 463.7 26.29
 3 -10 3 447.87 24.7
 -3 10 -4 236.45 14.69
 -3 -10 -4 210.25 14.23
 -3 10 -4 251.13 18.7
 -3 10 -5 162.76 12.37
 -3 -10 -5 135.97 11.3
 -3 10 -5 152.68 14.57
 -3 10 -6 -0.57 1.25
 -3 -10 -6 1.08 0.24
 -3 -10 -7 12.44 2.88
 -3 10 -7 15.02 4.51
 -3 -10 -7 9.19 2.92
 -3 -10 -8 122.11 9.98
 -3 -10 -8 117.33 11.57
 -3 10 -8 138.44 15.02
 -3 -10 -9 64.81 8.67
 -3 10 -9 58.37 9.77
 -3 -10 -10 2.96 2.43
 -3 10 -10 -0.65 1
 -3 -10 -11 167.63 15.51
 -3 10 -11 169.99 18
 -3 -10 -12 59.39 9.3
 -3 10 -12 67.61 11.28
 -3 -10 -13 40.5 7.94
 -3 10 -13 48.08 9.9
 -3 -10 -14 32.38 7.41
 -3 10 -14 41.12 9.25
 -3 -10 -15 0.91 0.95
 -3 10 -15 1.13 2.33
 -3 -10 -16 60.84 11.08
 -3 10 -16 61.47 12.42
 -3 -10 -17 91.46 13.89
 -3 10 -17 88.02 15.44
 3 -11 -20 60.92 11.27
 3 11 -20 52.44 10.27
 3 11 -19 1.22 1.42
 3 -11 -19 1.57 1.71
 3 11 -18 34.57 7.94
 3 -11 -18 51.41 9.52
 3 11 -17 13 4.97
 3 -11 -17 16.49 4.95
 3 -11 -16 -0.53 1.83
 3 11 -16 1.58 2.34
 3 11 -15 1.15 1.47
 3 -11 -15 6.19 2.93
 -3 11 15 9.05 5.92
 3 11 -14 17.75 4.73
 -3 11 14 29.62 9.65
 3 -11 -14 22.71 5.57
 3 11 -13 2.79 2.11
 -3 11 13 6.98 6.24
 -3 -11 13 5.87 4.64
 3 -11 -13 4.57 2.11
 3 -11 -12 1.11 1.82
 3 11 -12 2.95 1.91
 -3 -11 12 2.46 3
 3 -11 -11 19.92 5
 3 11 -11 14.3 4.09
 -3 -11 11 20.6 8.12
 3 -11 -10 8.47 3.23
 3 11 -10 7.62 3.18
 -3 -11 10 0.51 1.36
 3 -11 -9 -1.23 1.8
 3 -11 -9 -0.61 0.71
 3 11 -9 0.67 0.8
 3 11 -9 0.98 1.35
 -3 -11 8 -0.28 0.5
 3 -11 -8 0.36 0.34
 3 -11 -8 -0.69 1.09
 3 11 -8 0.04 0.11
 3 11 -8 0.06 1.12
 -3 -11 7 4.61 1.79
 3 -11 -7 7.73 2.28
 3 11 -7 9.13 2.76
 3 -11 -7 7.97 2.85
 3 11 -6 129.52 10.27
 -3 -11 6 111.15 10.72
 3 -11 -6 141.99 12.02
 3 -11 -5 109.04 10.42
 3 11 -5 96.23 8.41
 -3 -11 5 77.65 8.82
 3 11 -4 309.08 16.07
 3 -11 -4 329.7 18.99
 -3 -11 3 303.33 18.03
 -3 11 3 266.27 19.96
 -3 -11 2 159.47 12.39
 3 -11 -2 198.16 14.86
 -3 11 2 204.79 12.9
 3 -11 -1 137.52 12.39
 -3 -11 1 114.53 10.18
 -3 11 1 133.54 9.29
 -3 -11 0 54.15 6.66
 -3 11 0 58.78 5.78
 -3 -11 0 41.95 6.53
 3 -11 0 55.91 7.76
 3 -11 1 5.33 1.92
 -3 11 -1 9.26 2.04
 -3 -11 -1 6.39 2.15
 -3 -11 -1 5.55 1.43
 -3 11 -1 6.88 2.99
 -3 11 -2 1.11 1.13
 -3 -11 -2 1.52 1.4
 -3 11 -2 1.96 1.7
 3 -11 2 -0.04 1.03
 -3 -11 -2 0.17 0.57
 -3 11 -3 626.56 25.47
 -3 -11 -3 518.05 21.01
 -3 11 -3 586.13 31.22
 -3 -11 -3 557.77 26.12
 3 -11 3 625.86 30.84
 -3 -11 -4 1.73 1.26
 -3 11 -4 2.86 1.54
 -3 11 -4 2.01 1.52
 -3 -11 -5 2.68 1.87
 -3 11 -5 3.02 1.54
 -3 11 -5 3.54 2.46
 -3 11 -6 143.36 12.13
 -3 -11 -6 126.38 11.49
 -3 11 -6 136.69 14.61
 -3 -11 -7 7.22 1.95
 -3 11 -7 8.44 3.83
 -3 -11 -7 7.15 2.79
 -3 -11 -8 86.87 7.97
 -3 -11 -8 83.39 9.7
 -3 11 -8 102.27 12.96
 -3 -11 -9 124.78 10.32
 -3 -11 -9 124.4 12.45
 -3 11 -9 119.77 14.84
 -3 11 -10 5.14 1.77
 -3 -11 -10 2.23 1.32
 -3 -11 -11 5.09 2.44
 -3 11 -11 8.08 3.28
 -3 -11 -12 -1.59 0.56
 -3 11 -12 -0.06 0.87
 -3 -11 -13 4.82 2.57
 -3 11 -13 2.83 2.61
 -3 -11 -14 64.95 10.44
 -3 11 -14 55.51 11.42
 -3 -11 -15 7.68 4.21
 -3 11 -15 2.56 2.29
 -3 -11 -16 -2.13 2.51
 -3 11 -16 -0.54 2.58
 3 -12 -19 107.61 14.5
 3 12 -19 70.47 11.95
 3 12 -18 2.39 2.91
 3 -12 -18 0.44 1.51
 3 12 -17 31.84 7.27
 3 -12 -17 45.93 9.08
 3 12 -16 26.32 6.5
 3 -12 -16 26.85 6.49
 3 12 -15 -0.15 0.81
 3 -12 -15 -0.51 1.46
 3 -12 -14 2.85 1.97
 3 12 -14 0.68 1.08
 -3 12 14 6.85 5.13
 3 -12 -13 4.59 2.8
 3 12 -13 1.76 0.99
 -3 12 13 5.91 4.72
 3 -12 -12 16.78 4.74
 3 12 -12 7.04 2.73
 -3 12 12 6.38 5.98
 -3 -12 12 11.83 5
 3 12 -11 28.16 5.89
 3 -12 -11 30.24 6.3
 -3 -12 11 31.88 8.14
 3 12 -10 33.54 6.4
 3 -12 -10 44.37 7.33
 -3 -12 10 30.6 8.05
 3 -12 -9 1.5 0.79
 3 12 -9 1.26 1.37
 -3 -12 9 3.76 3.71
 3 12 -8 6.99 2.44
 3 12 -8 4.5 2.41
 3 -12 -8 11.05 3.7
 -3 -12 8 3.24 1.34
 -3 -12 8 2.25 3.77
 3 12 -7 95.68 9.08
 -3 -12 7 88.16 9.94
 3 -12 -7 116.89 11.66
 -3 -12 6 12.92 3.67
 3 12 -6 16.25 3.45
 3 -12 -6 13.41 3.93
 3 -12 -5 20.4 4.52
 3 12 -5 18.71 3.62
 -3 -12 5 18.05 4.24
 3 -12 -4 19.65 4.65
 -3 -12 4 13.63 3.7
 3 -12 -3 346.14 20.47
 -3 -12 3 281.56 17.87
 3 -12 -2 16.54 4.65
 -3 -12 2 14.53 3.75
 -3 12 2 10.33 2.63
 -3 -12 1 91.47 9.58
 -3 12 1 115.39 8.86
 3 -12 -1 120.19 11.99
 -3 -12 0 162.41 12.45
 -3 12 0 191.08 10.89
 3 -12 0 207.82 15.98
 3 -12 1 100.55 11.13
 -3 12 -1 100.23 7.8
 -3 -12 -1 82.43 8.92
 3 -12 2 0.66 0.78
 -3 12 -2 0.4 0.78
 -3 12 -2 1.05 1.09
 -3 -12 -2 -0.1 0.26
 -3 -12 -2 0.48 0.42
 -3 12 -3 45.83 5.62
 -3 -12 -3 40.22 4.18
 -3 12 -3 37.44 7.19
 -3 -12 -3 42.12 6.33
 3 -12 3 39.54 7.06
 -3 -12 -4 0.21 0.92
 -3 12 -4 1.31 1.41
 -3 12 -4 -0.74 0.88
 -3 -12 -4 -0.1 0.31
 3 -12 4 -0.5 1.82
 -3 -12 -5 0.34 0.99
 -3 12 -5 -0.15 0.27
 -3 12 -5 -0.4 0.31
 -3 -12 -6 3.45 1.66
 -3 12 -6 5.53 2.31
 -3 12 -6 6.2 3.21
 -3 -12 -7 7.28 2.81
 -3 12 -7 7.48 2.77
 -3 12 -7 10.13 4.44
 -3 -12 -8 0.66 0.91
 -3 12 -8 0.11 0.25
 -3 -12 -8 -0.93 1.05
 -3 -12 -9 62.07 6.71
 -3 -12 -9 73.53 9.44
 -3 12 -9 83.18 12.3
 -3 -12 -10 5.52 2.07
 -3 12 -10 4.46 3.53
 -3 -12 -10 5.79 2.94
 -3 12 -11 28.97 7.49
 -3 -12 -11 17.78 5.13
 -3 12 -12 2.26 2.78
 -3 -12 -12 3.03 1.75
 -3 -12 -13 25.19 6.43
 -3 12 -13 22.03 7.13
 -3 -12 -14 9.78 4.23
 -3 12 -14 5.5 3.28
 -3 -12 -15 5.3 2.81
 -3 12 -15 7.72 4.57
 3 13 -18 1.05 1.1
 3 -13 -18 1.95 2.46
 3 13 -17 3.35 2.61
 3 -13 -17 8.06 4.49
 3 -13 -16 -0.35 0.97
 3 13 -16 1.89 2.89
 3 -13 -15 2.21 2.16
 3 13 -15 -0.17 1.48
 3 -13 -14 22.17 6.05
 3 13 -14 15.23 4.63
 3 13 -13 40.18 7.61
 3 -13 -13 52.32 8.65
 3 -13 -12 5.08 2.87
 3 13 -12 -0.23 1.05
 -3 13 12 8.34 5.01
 3 -13 -11 -0.96 0.63
 3 13 -11 0.48 1.23
 -3 13 11 0.16 3.32
 3 13 -10 0.3 1.04
 3 -13 -10 1.26 0.97
 3 13 -9 39.94 6.98
 3 -13 -9 50.82 8.1
 -3 -13 9 30.59 7.22
 -3 -13 8 14.59 4.02
 3 -13 -8 18.37 4.73
 3 13 -8 16.17 4.5
 -3 -13 8 7.52 3.94
 -3 -13 7 155.48 14.02
 -3 -13 7 96.43 15.75
 3 -13 -6 430.22 24.78
 -3 -13 6 349.11 22.33
 3 -13 -5 42.28 7.03
 -3 -13 5 26.85 5.5
 3 -13 -4 138.64 13.17
 -3 -13 4 102.31 10.95
 3 -13 -3 181.2 15.38
 -3 -13 3 152.35 13.32
 -3 -13 2 327.72 19.96
 3 -13 -2 416.61 24.17
 3 -13 -1 30.91 6.24
 -3 -13 1 17.27 4.09
 -3 13 1 23.79 4.33
 -3 -13 0 5.69 2.58
 3 -13 0 10.12 3.29
 -3 13 0 5.86 1.93
 -3 -13 -1 100.24 10.31
 3 -13 1 121.77 13.05
 -3 13 -1 111.41 8.48
 -3 13 -2 43.29 5.17
 3 -13 2 53.19 8.36
 -3 13 -2 45.24 8.18
 -3 -13 -2 22.69 5.81
 -3 -13 -2 41.71 6.46
 3 -13 3 21.2 5.16
 -3 13 -3 20.26 3.64
 -3 13 -3 16.97 4.88
 -3 -13 -3 20.94 4.61
 -3 -13 -3 13.65 2.68
 -3 -13 -4 1.47 1.53
 -3 13 -4 1.56 1.33
 -3 13 -4 2.16 1.31
 -3 -13 -4 0.89 0.53
 3 -13 4 0.05 1.35
 -3 -13 -5 3.51 1.72
 -3 13 -5 2.37 1.52
 -3 13 -5 2.65 1.92
 -3 -13 -5 1.76 0.86
 -3 13 -6 31.12 5.28
 -3 13 -6 29.37 7.03
 -3 -13 -6 29.61 5.8
 -3 -13 -7 3.94 2
 -3 13 -7 4.35 2.21
 -3 13 -7 2.57 2.23
 -3 13 -8 72.97 9.08
 -3 -13 -8 56.36 8.43
 -3 13 -8 59.34 10.44
 -3 -13 -9 43.22 7.49
 -3 13 -9 35.49 8.33
 -3 13 -10 6.29 3.85
 -3 -13 -10 3.78 2.64
 -3 13 -11 37.75 8.9
 -3 -13 -11 31.06 6.75
 -3 13 -12 13.71 5.95
 -3 -13 -12 14.91 4.69
 -3 13 -13 13.84 5.34
 -3 -13 -13 19.47 5.71
 -3 13 -14 10.88 5.24
 -3 -13 -14 8.77 3.98
 3 -14 -16 7.99 4.45
 3 14 -16 3.54 3.01
 3 -14 -15 14.46 4.74
 3 14 -15 12.57 4.6
 3 -14 -14 6.08 2.99
 3 14 -14 1.01 0.81
 3 -14 -13 13.87 4.97
 3 14 -13 10.96 3.83
 3 14 -12 35.17 7.21
 3 -14 -12 55.31 9.36
 3 -14 -11 8.26 3.23
 3 14 -11 4.57 2.61
 3 14 -10 1.71 1.71
 3 -14 -10 3.29 2.21
 3 14 -9 5.28 2.65
 3 -14 -9 9.52 3.59
 3 14 -8 58.64 8.88
 3 -14 -8 78.03 10.42
 -3 -14 8 59.3 8.81
 3 -14 -7 26.75 6.05
 -3 -14 7 21.57 5.18
 3 -14 -6 165.88 15.2
 -3 -14 6 126.5 12.98
 3 -14 -5 84.31 10.6
 -3 -14 5 71.79 9.46
 3 -14 -4 40.22 7.46
 -3 -14 4 36.22 6.42
 3 -14 -3 83.28 10.95
 -3 -14 3 61.25 8.6
 3 -14 -2 10.53 4.15
 -3 -14 2 4.91 2.29
 -3 -14 1 -0.36 1.41
 3 -14 -1 -0.7 1.84
 -3 14 1 2.99 3.08
 -3 -14 0 0.85 0.79
 3 -14 0 1.06 0.94
 -3 14 0 -0.94 1.7
 -3 -14 -1 10.02 3.29
 3 -14 1 9.59 3.61
 -3 14 -1 6.75 1.96
 3 -14 2 8.57 2.95
 -3 14 -2 8.11 3.89
 -3 14 -2 10.47 2.46
 -3 -14 -2 11.54 3.34
 3 -14 3 22.4 5.75
 -3 14 -3 23.65 3.84
 -3 14 -3 17.92 5.31
 -3 -14 -3 19.23 4.58
 -3 14 -4 17.95 5.55
 3 -14 4 19.46 5.27
 -3 14 -4 19.51 3.68
 -3 -14 -4 19.88 4.82
 -3 14 -5 11.17 3.01
 -3 14 -5 7.49 3.49
 -3 -14 -5 8.29 3.06
 -3 -14 -6 13.67 3.9
 -3 14 -6 12.45 3.2
 -3 14 -6 7.75 3.64
 -3 14 -7 62.62 7.73
 -3 -14 -7 51.33 8.13
 -3 14 -7 62.78 11.02
 -3 -14 -8 13.44 4.23
 -3 14 -8 12.04 3.62
 -3 14 -8 10.07 4.32
 -3 -14 -9 2.15 1.98
 -3 14 -9 -1.17 1.83
 -3 14 -9 2.86 2.52
 -3 -14 -10 8.58 3.8
 -3 14 -10 14.79 5.67
 -3 14 -11 5.35 3.6
 -3 -14 -11 4.14 2.42
 -3 -14 -12 53.86 9.4
 -3 14 -12 51.31 10.84
 -3 14 -13 3.53 3.4
 -3 -14 -13 4.74 3.64
 3 -15 -15 -0.45 0.59
 3 -15 -14 14.75 4.79
 3 15 -14 13.94 4.86
 3 -15 -13 9.19 3.94
 3 15 -13 0.67 1.16
 3 15 -12 1.9 2.08
 3 -15 -12 -1.42 1.76
 3 15 -11 30.14 6.75
 3 -15 -11 39.65 7.94
 3 15 -10 6.77 3.37
 3 -15 -10 5.86 2.99
 3 15 -9 66.48 9.79
 3 -15 -9 79.51 11.24
 -3 -15 8 2.49 2.18
 3 15 -8 2.62 2.34
 3 -15 -8 -0.45 1.83
 3 -15 -7 88.42 11.61
 -3 -15 7 63.65 9.63
 3 -15 -6 1.84 2.01
 -3 -15 6 0.45 1.39
 3 -15 -5 38.28 7.53
 -3 -15 5 29.64 6.27
 3 -15 -4 65.49 10.24
 -3 -15 4 60.37 8.88
 3 -15 -3 30.6 6.74
 -3 -15 3 23.48 5.28
 -3 -15 2 10.74 3.65
 3 -15 -2 16.12 4.88
 -3 -15 1 48.89 7.83
 3 -15 -1 84.12 11.41
 -3 -15 0 5.87 2.6
 3 -15 0 5.05 2.66
 3 -15 1 11.21 4.18
 -3 -15 -1 5.88 2.41
 -3 15 -2 3.44 2.37
 3 -15 2 2.14 1.46
 -3 -15 -2 4.18 2.11
 3 -15 3 2.72 2.69
 -3 15 -3 1.53 2.08
 -3 -15 -3 1.05 1.32
 3 -15 4 21.98 6.17
 -3 15 -4 15.51 5.39
 -3 -15 -4 18.44 4.86
 -3 -15 -5 1.67 1.99
 -3 15 -5 0.38 1.93
 -3 -15 -6 0.25 0.89
 -3 15 -6 0.75 1.1
 -3 15 -7 43.2 9.5
 -3 -15 -7 44.55 7.9
 -3 -15 -8 10.47 3.76
 -3 15 -8 7.46 4.22
 -3 15 -9 19.32 6.19
 -3 -15 -9 19.59 5.45
 -3 -15 -10 18.12 5.44
 -3 15 -10 14.92 5.64
 -3 -15 -11 9.17 3.81
 -3 15 -11 7.47 4.19
 3 -16 -13 3.05 2.23
 3 16 -12 27.59 6.63
 3 -16 -12 33.21 7.47
 3 16 -11 2.05 1.78
 3 -16 -11 -0.7 0.71
 3 16 -10 13.62 4.53
 3 -16 -10 20.83 6.03
 3 16 -9 2.25 1.9
 3 -16 -9 1.42 2.74
 3 -16 -8 92.4 12.32
 3 16 -8 67.76 10.21
 -3 -16 8 65.9 10.13
 -3 -16 7 24.33 6.04
 3 -16 -7 25.41 6.45
 3 -16 -6 -1.51 1.66
 -3 -16 6 -1.45 1.82
 -3 -16 5 65.71 9.83
 3 -16 -5 80.73 11.33
 -3 -16 4 6 2.12
 3 -16 -4 14.08 4.92
 3 -16 -3 4.83 3.06
 -3 -16 3 1.26 1.57
 -3 -16 2 0.35 0.36
 3 -16 -2 0.6 0.82
 3 -16 -1 39.7 8.24
 -3 -16 1 35.46 6.9
 -3 -16 0 33.26 6.75
 3 -16 0 44.52 8.68
 3 -16 1 21.12 6.1
 -3 -16 -1 20.54 5.48
 -3 16 -1 23.25 6.9
 -3 -16 -2 4.74 2.02
 -3 16 -2 8 4.39
 3 -16 2 5.53 3.06
 3 -16 3 -0.01 1.51
 -3 16 -3 -0.18 0.8
 -3 -16 -3 1.34 0.33
 -3 16 -4 54.82 10.48
 3 -16 4 59.76 10.36
 -3 -16 -4 59.09 8.89
 -3 16 -5 6.88 3.4
 -3 -16 -5 9.61 3.77
 -3 16 -6 132.01 16.99
 -3 -16 -6 134.01 14.26
 -3 -16 -7 33.55 6.88
 -3 16 -7 32.38 8.36
 -3 16 -8 103.13 15.24
 -3 -16 -8 84.67 11.65
 -3 -16 -9 -0.12 0.35
 -3 16 -9 -0.21 2.83
 3 -17 -10 30 7.24
 3 -17 -9 0.69 1.52
 3 17 -9 -0.4 1.07
 3 -17 -8 7.26 2.96
 3 17 -8 3.68 2.29
 -3 -17 8 7.54 3.73
 -3 -17 7 1.91 2.13
 3 -17 -7 3.05 1.58
 -3 -17 6 2.17 1.64
 3 -17 -6 3.95 3.1
 -3 -17 5 28.02 6.6
 3 -17 -5 43.9 8.7
 3 -17 -4 5.03 2.82
 -3 -17 4 3.17 1.77
 3 -17 -3 1.79 2.71
 -3 -17 3 1.86 1.73
 -3 -17 2 1.45 1.24
 3 -17 -2 0.09 1.32
 -3 -17 1 0.45 0.46
 3 -17 -1 0.98 1.89
 -3 -17 0 4.95 2.94
 3 -17 0 4.92 2.98
 3 -17 1 -0.07 1.38
 -3 -17 -1 0.24 0.67
 -3 17 -1 1.22 1.68
 -3 -17 -2 14.09 4.39
 -3 17 -2 8.39 3.87
 3 -17 2 13.64 5.26
 -3 -17 -3 1.47 1.39
 3 -17 3 2.72 2.39
 -3 17 -3 3.6 3.1
 3 -17 4 2.46 3.32
 -3 17 -4 2.05 1.51
 -3 -17 -4 2.16 1.25
 -3 17 -5 -0.89 2.38
 -3 -17 -5 1.83 1.79
 -3 -17 -6 9.11 4.04
 -3 17 -6 7.35 4.66
 -3 17 -7 19.55 6.9
 3 -18 -5 101.9 14.32
 3 -18 -4 69.71 11.88
 3 -18 -3 40.81 9.15
 -3 -18 2 0.86 0.97
 3 -18 -2 4.36 2.4
 -3 -18 1 8.58 3.99
 3 -18 -1 12.48 4.57
 3 -18 0 5.75 2.54
 3 -18 1 27.89 7.39
 -3 18 -1 28.7 8.15
 -3 18 -2 1.59 3.02
 -3 18 -3 1.25 1.86
 -4 0 21 12.59 8.49
 -4 0 20 17.19 10.69
 4 0 -19 0.65 1.58
 -4 0 19 6.58 7.82
 4 0 -18 436.38 27.69
 4 0 -17 2.66 2.61
 4 0 -16 648.19 32.5
 -4 0 15 -0.59 0.63
 -4 0 14 102.88 9.3
 4 0 -14 119.21 10.84
 4 0 -13 -0.01 0.56
 4 0 -12 391.87 18.98
 4 0 -11 -0.43 0.99
 4 0 -10 848.24 29.71
 4 0 -9 0.02 0.17
 4 0 -8 219.6 9.07
 4 0 -8 198.89 8.57
 -4 0 7 3.74 3.63
 -4 0 6 1.09 1.55
 4 0 -5 0.72 1.13
 -4 0 5 0.94 1.36
 4 0 -4 0.95 1.43
 -4 0 4 1.4 1.22
 4 0 -3 1.96 1.37
 -4 0 3 -0.22 0.38
 4 0 -2 2.2 1.57
 -4 0 2 1 0.58
 4 0 -1 0.26 0.21
 -4 0 1 0.14 1.17
 -4 0 0 70.24 7.23
 4 0 0 80.1 4.9
 -4 0 -1 0.13 0.56
 -4 0 -1 0.15 0.09
 -4 0 -1 0.6 0.88
 4 0 1 0.13 0.16
 -4 0 -1 -0.09 0.24
 -4 0 -2 77.01 7.84
 4 0 2 73.12 6.14
 -4 0 -2 77.25 6.43
 -4 0 -3 0.1 0.48
 -4 0 -3 0.73 0.91
 4 0 3 0.44 1.01
 -4 0 -4 96.84 9.58
 4 0 4 109.63 8.81
 -4 0 -4 96.79 8.8
 -4 0 -5 -0.68 1.18
 -4 0 -5 0.59 0.77
 4 0 5 0.48 1.05
 4 0 6 375.88 20.38
 -4 0 -6 398.45 21.92
 -4 0 -7 -0.05 1.07
 4 0 7 -0.16 0.46
 4 0 8 121.78 11.46
 -4 0 -8 134.95 13.07
 -4 0 -9 -1.15 2.26
 4 0 9 -1.01 2.19
 -4 0 -10 298.31 22.29
 -4 0 -11 1.53 2.12
 -4 0 -12 112.12 14.14
 -4 0 -13 1.86 1.42
 -4 0 -14 173.89 19.2
 -4 0 -15 0.08 3.21
 -4 0 -16 0.21 2.28
 -4 0 -17 -1.37 3.55
 -4 0 -18 4.6 4.1
 -4 0 -19 -0.94 2.54
 -4 0 -20 55.03 12.66
 -4 1 21 17.41 9.31
 -4 -1 21 13.26 8.36
 -4 1 20 15.61 10.98
 -4 -1 20 12.49 9.1
 4 1 -19 15.22 4.81
 -4 1 19 3.3 5.15
 -4 -1 19 16.42 13.25
 4 1 -18 47.7 8.29
 4 -1 -18 53.08 9.13
 4 1 -17 4.97 2.5
 4 -1 -17 13.7 3.97
 4 1 -16 383.24 23.85
 4 -1 -16 416.23 24.86
 -4 1 15 24.43 4.55
 -4 1 14 77.39 8
 4 -1 -14 128.54 12.47
 4 1 -13 7.14 2.4
 4 1 -13 9.82 2.64
 4 -1 -13 10.74 3.17
 -4 1 13 8.67 2.26
 4 -1 -12 556.91 22.71
 -4 1 12 519.87 21.71
 4 1 -12 477.15 22.37
 4 1 -12 542.02 23.84
 4 1 -11 81.42 7.02
 -4 1 11 100.75 6.95
 4 1 -11 78.22 7
 4 1 -10 463.76 19.51
 4 1 -10 488.64 19.66
 4 -1 -10 504.63 20.47
 4 -1 -9 13.57 2.24
 4 1 -9 17.89 2.55
 4 1 -9 14.14 2.23
 4 1 -8 4.37 0.93
 4 1 -8 5.1 1.03
 4 -1 -8 5.34 1.13
 -4 1 8 3.69 4.28
 -4 -1 8 1.01 1.6
 4 1 -7 37.52 2.32
 -4 1 7 30.85 7.58
 -4 -1 7 23.26 7.07
 -4 1 6 194.67 14.96
 -4 -1 6 174.29 14.94
 4 -1 -5 100.03 9.61
 4 1 -5 102.9 9.82
 -4 1 5 75.91 7.82
 -4 -1 5 79.79 8.14
 4 -1 -4 20.3 4.22
 4 1 -4 19.67 4.13
 -4 1 4 22.39 3.93
 -4 -1 4 18.43 3.54
 4 -1 -3 269.26 16.39
 4 1 -3 275.9 16.54
 -4 1 3 230.09 13.82
 -4 -1 3 239.79 13.86
 4 -1 -2 18.89 4.07
 4 1 -2 17.32 3.7
 -4 1 2 17.34 3.36
 -4 -1 2 16.64 3.25
 -4 1 1 330.54 17.41
 -4 -1 1 318.9 17.04
 4 1 -1 361.52 12.76
 -4 1 0 277.5 15.37
 -4 -1 0 252.92 14.58
 -4 -1 0 232.88 8.03
 4 1 0 290.55 11.69
 -4 1 0 225.19 7.85
 -4 1 0 313.32 11.53
 -4 -1 -1 11.63 1.54
 -4 1 -1 13.96 3.12
 -4 -1 -1 14.81 3.28
 4 -1 1 11.41 1.96
 4 1 1 14.72 2.48
 -4 1 -1 13.3 1.74
 -4 1 -1 15.08 2.41
 -4 -1 -2 40.72 3.73
 -4 1 -2 39.1 5.49
 -4 -1 -2 36.89 5.28
 -4 1 -2 40.84 3.81
 4 -1 2 44.75 4.52
 4 1 2 43.82 4.93
 -4 1 -2 36.81 4.33
 -4 1 -3 57.76 7.16
 -4 -1 -3 65.29 7.32
 4 -1 3 68.9 6.29
 4 1 3 67.71 6.69
 -4 1 -3 69.19 6.79
 -4 -1 -3 78.27 7.52
 -4 1 -4 17.44 3.58
 -4 -1 -4 17.15 3.54
 -4 1 -4 17.28 3.98
 -4 -1 -4 16.11 3.61
 4 -1 4 16.85 3.17
 4 1 4 17.25 3.53
 -4 -1 -5 9.79 2.82
 -4 1 -5 7.29 2.57
 -4 -1 -5 9.41 2.89
 4 -1 5 12.69 3.02
 4 1 5 9.14 2.53
 -4 1 -5 11.58 3.23
 4 -1 6 27.99 4.75
 4 1 6 28.73 5.06
 -4 1 -6 38.15 6.31
 -4 -1 -6 30.29 5.31
 4 -1 7 438.15 23.18
 4 1 7 422.41 23.31
 -4 1 -7 476.85 26.16
 -4 -1 -7 446.35 24.73
 -4 -1 -8 2.31 2.32
 4 -1 8 1.71 1.61
 4 1 8 1.61 1.23
 -4 1 -8 0.51 1.52
 4 -1 9 287.53 19.31
 4 1 9 271.02 19.14
 -4 1 -9 335.93 23.12
 -4 -1 -9 310.86 21.72
 -4 -1 -10 19.05 5.2
 -4 1 -10 20.45 5.65
 -4 -1 -11 19.9 5.29
 -4 1 -11 16.69 5.14
 -4 -1 -12 2.73 1.14
 -4 1 -12 7.21 3.26
 -4 -1 -13 0.28 1.9
 -4 1 -13 -0.81 1.54
 -4 1 -14 1.13 0.4
 -4 -1 -14 -0.37 1.92
 -4 1 -15 24.79 7.33
 -4 -1 -15 18.36 6.38
 -4 1 -16 38.04 9.47
 -4 -1 -16 30.49 8.25
 -4 1 -17 2 0.64
 -4 -1 -17 -1.2 2.92
 -4 1 -18 22 7.92
 -4 -1 -18 16.19 6.54
 -4 1 -19 35.61 9.95
 -4 -1 -19 29.08 8.9
 -4 1 -20 27.71 8.96
 -4 -1 -20 24.16 8.44
 -4 2 21 12.62 7.89
 -4 -2 21 20.27 9.52
 -4 2 20 19.76 11.49
 -4 -2 20 11.62 10.16
 4 2 -19 20.06 5.64
 -4 2 19 6.07 8.98
 -4 -2 19 9.46 7.01
 4 2 -18 13.28 4.49
 4 -2 -18 11.86 3.87
 4 -2 -17 180.54 15.75
 4 2 -17 163.28 15.82
 4 -2 -16 17.5 4.09
 4 2 -16 23.17 5.57
 -4 2 14 37.24 5.22
 4 2 -14 43.83 6.17
 4 2 -13 104.65 9.36
 -4 2 13 110.36 8.93
 4 2 -13 117.67 10.94
 4 -2 -12 222.38 14.08
 4 2 -12 189.64 12.67
 -4 2 12 208.63 12.01
 4 2 -12 224.64 14.51
 4 -2 -11 288.91 15.16
 -4 2 11 269.69 13.13
 4 2 -11 289.06 15.88
 4 2 -11 272.41 14.53
 4 -2 -10 74.39 6.26
 4 2 -10 72.44 6.12
 -4 2 10 77.74 5.5
 4 2 -10 74.82 6.86
 4 2 -9 4.85 1.3
 -4 2 9 6.65 1.16
 4 -2 -9 6.65 1.5
 4 2 -9 8.14 2.04
 4 -2 -8 17.01 2.09
 4 2 -8 19.62 2.68
 4 2 -8 16.62 2.15
 4 2 -7 56.22 3.54
 4 -2 -7 54.09 3.27
 4 2 -7 57.67 4.06
 -4 2 7 33.32 7.87
 -4 -2 7 34.21 9.26
 4 2 -6 2.88 0.76
 4 2 -6 2.68 0.61
 -4 2 6 0.07 1.75
 -4 -2 6 -0.33 2.64
 4 -2 -5 2.02 1.32
 4 2 -5 1.58 0.81
 -4 2 5 2.91 1.36
 -4 -2 5 1.21 0.77
 4 -2 -4 84.1 8.68
 4 2 -4 89.22 9.05
 -4 2 4 89.66 7.99
 -4 -2 4 75.34 7.37
 4 -2 -3 139.8 11.61
 4 2 -3 160.04 12.3
 -4 2 3 150.27 10.64
 -4 -2 3 135.22 10.01
 4 2 -3 176.14 7.59
 4 2 -2 4.53 1.85
 -4 2 2 3.9 1.65
 -4 -2 2 2.65 1.37
 4 2 -2 5.46 1.27
 -4 2 1 2.9 0.74
 -4 -2 1 2.56 1.28
 4 2 -1 3.46 1.16
 -4 -2 1 1.53 0.44
 -4 2 0 1.33 0.64
 -4 -2 0 1.26 0.43
 -4 2 0 1.63 0.46
 -4 2 0 1.86 1.22
 -4 -2 0 1.78 1.36
 4 2 0 1.37 0.69
 -4 2 -1 263.22 10.65
 -4 2 -1 288.78 16.28
 -4 -2 -1 269.93 10.65
 -4 -2 -1 269.81 15.47
 4 2 1 302.58 14.81
 -4 2 -1 300.35 13.84
 -4 -2 -2 31.66 3.28
 -4 2 -2 33.46 5.13
 -4 -2 -2 31.54 4.77
 4 -2 2 33.37 3.83
 -4 2 -2 41.93 3.93
 4 2 2 36.21 4.78
 -4 2 -2 39 4.86
 -4 2 -3 3.51 1.33
 -4 -2 -3 2.9 1.05
 -4 2 -3 1.91 1.08
 -4 -2 -3 3.07 1.65
 4 -2 3 2.04 0.85
 4 2 3 2.35 1
 -4 2 -3 1.97 0.96
 -4 -2 -4 1.28 1.1
 -4 -2 -4 3.33 1.19
 -4 2 -4 1.41 1.5
 -4 -2 -4 2.63 1.25
 -4 2 -4 0.88 0.49
 4 -2 4 1.66 0.84
 4 2 4 0.67 0.95
 -4 2 -4 0.43 0.58
 -4 2 -5 79.97 9.23
 -4 -2 -5 83.55 8.97
 4 -2 5 82.89 8
 4 2 5 79.68 8.77
 -4 2 -5 88.1 9.52
 -4 -2 -5 101.15 10.04
 -4 -2 -6 29.11 5.33
 4 -2 6 31.14 4.97
 4 2 6 26.57 5.11
 -4 2 -6 29.53 5.61
 -4 -2 -7 17.74 4.45
 4 -2 7 23.58 4.55
 4 2 7 19.42 4.57
 -4 2 -7 22.31 5.19
 4 -2 8 797.87 35.65
 4 2 8 772.95 36.62
 -4 2 -8 904.66 41.13
 -4 -2 -8 853.51 38.71
 4 -2 9 212.76 16.23
 4 2 9 202.04 16.54
 -4 2 -9 264.34 20.64
 -4 -2 -9 225.3 18.06
 -4 2 -10 263.7 21.69
 -4 -2 -10 255.56 20.27
 -4 -2 -11 38.4 7.68
 -4 2 -11 33.13 7.88
 -4 -2 -12 -0.52 0.84
 -4 2 -12 0.05 1.79
 -4 -2 -13 19.66 6.01
 -4 2 -13 19.37 6.32
 -4 2 -14 88.13 13.87
 -4 -2 -14 83.7 13.1
 -4 -2 -15 44.25 9.68
 -4 2 -15 47.13 10.77
 -4 -2 -16 25.79 7.51
 -4 2 -16 26.98 8.03
 -4 -2 -17 -0.33 2.32
 -4 2 -17 1.38 2.48
 -4 -2 -18 4.32 3.5
 -4 2 -18 6.55 4.51
 -4 2 -19 28.27 9.18
 -4 -2 -19 18.1 7.13
 -4 2 -20 4.17 3.72
 -4 -2 -20 1.55 3.42
 -4 3 21 15.87 9.06
 4 -3 -20 3.94 2.16
 -4 3 20 23.07 11.85
 -4 -3 20 25.1 11.59
 4 -3 -19 27.79 6.57
 -4 3 19 15.94 13.12
 -4 -3 19 23.22 12.05
 4 3 -19 23.62 6.21
 4 -3 -18 1.38 2.34
 4 3 -18 1.33 2.56
 4 -3 -17 -0.34 1
 4 3 -17 -0.02 0.65
 4 -3 -16 98.61 11.49
 4 3 -16 101.89 12.06
 4 -3 -15 23.39 5.22
 4 3 -15 25.96 5.83
 4 -3 -14 98.58 10.21
 -4 3 14 76.67 7.82
 4 3 -14 77.04 8.64
 -4 3 13 119.29 9.38
 4 3 -13 113.11 9.94
 4 3 -12 22.16 3.94
 4 -3 -12 19.97 3.84
 -4 3 12 18.98 3.27
 4 3 -12 20.82 4.16
 4 -3 -11 287.66 15.14
 4 3 -11 273.34 14.64
 -4 3 11 252.88 13.04
 4 3 -11 261.11 15.26
 4 -3 -10 33.91 4.23
 4 3 -10 31.49 4.06
 -4 3 10 26.16 3.27
 4 3 -10 29.42 4.29
 4 3 -9 376.51 15.91
 4 -3 -9 384.64 15.75
 -4 3 9 376.03 14.42
 4 3 -9 373.89 17.13
 4 -3 -8 401.09 14.08
 -4 3 8 358.14 11.81
 4 3 -8 343.53 14.89
 -4 3 8 104.42 22.12
 4 3 -8 390.44 14.45
 4 3 -7 26.48 2.74
 4 3 -7 24.96 2.97
 4 -3 -7 29.28 2.77
 -4 3 7 21.39 6.89
 -4 -3 7 22.64 7.98
 4 -3 -6 13.41 1.68
 4 3 -6 15.82 1.94
 4 3 -6 13.5 2.02
 -4 3 6 7.34 2.39
 -4 -3 6 8.19 3.57
 4 3 -5 2.16 0.77
 4 -3 -5 1.72 1.39
 4 3 -5 2.18 1.5
 4 3 -5 1.51 0.59
 -4 3 5 1.63 1.22
 -4 -3 5 1.2 0.3
 4 -3 -5 3.01 0.69
 4 -3 -4 77.49 8.28
 4 3 -4 81.49 8.52
 -4 3 4 63.81 6.93
 4 3 -4 66.27 4.37
 -4 -3 4 61.09 6.62
 4 3 -4 84.74 5.99
 4 3 -3 1.98 0.8
 4 -3 -3 2.26 1.48
 4 3 -3 4.91 1.8
 -4 3 3 4.47 1.72
 -4 -3 3 2.78 1.27
 4 3 -2 246.7 15.84
 -4 3 2 220.1 13.68
 -4 -3 2 203.36 12.67
 -4 3 2 249.66 9.17
 4 3 -2 272.37 12.5
 -4 -3 2 219.69 8.99
 -4 -3 1 227.26 9.28
 -4 3 1 240.1 9.07
 -4 3 1 252.13 14.66
 -4 -3 1 225.71 13.58
 -4 3 1 275.27 11.12
 4 3 -1 291.09 13.78
 -4 3 0 49.22 6.07
 -4 -3 0 45.64 5.53
 -4 3 0 44.78 3.19
 -4 -3 0 41.84 3.22
 -4 3 0 48.27 4.59
 4 3 0 56.42 5.85
 -4 3 -1 195.92 13.17
 -4 -3 -1 191.34 12.46
 -4 -3 -1 185.69 8.71
 -4 3 -1 227.73 12.08
 4 3 1 228.14 13.57
 -4 3 -1 201.47 9.07
 -4 3 -2 1.1 0.71
 -4 -3 -2 0.32 0.74
 -4 3 -2 0.45 0.48
 -4 -3 -2 1.8 0.67
 -4 3 -2 1.17 1.18
 4 3 2 1.1 1.05
 -4 3 -3 2.9 1.23
 -4 3 -3 4.5 1.56
 -4 -3 -3 0.59 1.05
 -4 -3 -3 1.94 0.72
 -4 3 -3 4.5 2.18
 4 3 3 4.84 2.12
 -4 3 -4 111.96 8.48
 -4 -3 -4 93.5 7.59
 -4 3 -4 105.52 10.22
 -4 -3 -4 97.99 9.29
 4 -3 4 101.89 8.33
 -4 3 -4 105.07 9.89
 4 3 4 105.29 10
 -4 -3 -5 3.77 1.49
 -4 3 -5 4.02 1.61
 -4 -3 -5 3.49 1.65
 4 -3 5 4.54 1.88
 -4 3 -5 3.6 1.42
 4 3 5 4.31 2.39
 -4 3 -5 5.1 2.17
 -4 -3 -6 235.04 15.94
 4 3 6 235.18 17.04
 -4 3 -6 289.09 18.9
 -4 3 -6 245.3 15.23
 4 -3 6 247.57 15.75
 -4 -3 -6 253.5 15.61
 -4 3 -7 45.53 6.44
 4 3 7 44.67 7.27
 -4 3 -7 52.53 8.01
 4 -3 7 43.11 6.37
 -4 -3 -7 47.44 7.41
 4 -3 8 271.57 18.01
 4 3 8 258.11 19.23
 -4 3 -8 305.88 22.12
 -4 -3 -9 9.25 4.31
 4 -3 9 3.16 2.03
 -4 3 -9 6.81 3.44
 -4 3 -10 305.03 24.01
 -4 -3 -10 290.19 22.51
 -4 3 -11 50.72 9.78
 -4 -3 -11 43.33 8.58
 -4 -3 -12 26.51 6.78
 -4 3 -12 24.21 6.74
 -4 -3 -13 2.53 1.65
 -4 3 -13 4.18 3.05
 -4 -3 -14 19.66 6.38
 -4 3 -14 15.85 5.68
 -4 -3 -15 11.96 5.03
 -4 3 -15 9.71 4.82
 -4 -3 -16 45.39 10.12
 -4 3 -16 55.54 11.95
 -4 3 -17 82.95 14.97
 -4 -3 -17 94.28 15.58
 -4 -3 -18 4.85 3.37
 -4 3 -18 0.28 1.46
 -4 -3 -19 1.85 1.57
 -4 3 -19 -1.22 3.56
 -4 4 21 20.87 9.3
 4 -4 -20 29.24 7.15
 -4 4 20 31.8 13.64
 -4 -4 20 39.07 12.33
 4 -4 -19 8.01 2.88
 -4 -4 19 4.82 7.76
 4 4 -19 6.33 3.64
 4 -4 -18 -0.3 1.25
 4 4 -18 1.7 2.2
 4 -4 -17 0.9 1.74
 4 4 -17 -0.29 1.09
 4 -4 -16 5.76 3.1
 4 4 -16 -0.25 0.65
 4 -4 -15 0.26 0.78
 4 4 -15 2.06 1.71
 4 -4 -14 110.68 10.78
 -4 4 14 73.8 7.87
 4 4 -14 97.94 9.74
 4 4 -14 102.23 10.73
 4 4 -13 1.77 1.41
 -4 4 13 1.16 1.21
 -4 4 12 10.81 2.47
 4 4 -12 10.3 2.75
 4 -4 -11 137.53 9.97
 4 4 -11 115.72 9.2
 -4 4 11 115.27 8.37
 4 4 -11 121.61 10.13
 4 4 -10 43.1 4.97
 4 -4 -10 45.23 4.97
 -4 4 10 42.46 4.45
 4 4 -10 40.64 5.22
 4 4 -9 -0.05 0.69
 4 4 -9 1.04 0.87
 -4 4 9 0.4 0.62
 4 -4 -9 0.45 0.41
 4 4 -8 19.42 3.14
 4 -4 -8 22.81 2.92
 -4 4 8 22.51 2.65
 4 4 -8 26.92 3.28
 4 4 -7 69.91 5.17
 4 4 -7 53.62 5.02
 -4 4 7 59.52 4.12
 4 -4 -7 68.26 4.93
 -4 4 7 33.25 8.84
 -4 -4 7 19.99 8.86
 4 -4 -6 0.94 0.61
 -4 4 6 0.84 0.33
 4 4 -6 1.48 0.71
 -4 4 6 0.52 0.23
 4 4 -6 1.43 0.77
 4 4 -5 158.47 8.06
 4 -4 -5 134.87 11.25
 4 4 -5 146.42 12.09
 4 4 -5 115.12 7.15
 -4 4 5 153.72 6.38
 -4 4 5 128.78 10.59
 4 -4 -5 150.09 7.56
 -4 -4 5 86.64 9.93
 -4 4 5 121.97 5.9
 4 4 -4 488.42 17.62
 4 -4 -4 510.51 16.95
 4 -4 -4 443.03 22.51
 4 4 -4 462.92 23.29
 -4 4 4 411.85 20.75
 -4 -4 4 387.38 20.23
 -4 4 4 480.3 15.43
 -4 4 4 384.86 14.47
 4 -4 -3 37.52 5.59
 4 4 -3 38.97 5.9
 -4 4 3 35.97 5.04
 -4 -4 3 35.26 3.32
 -4 -4 3 38.01 5.05
 -4 4 3 46.2 3.58
 4 4 -2 9.74 2.3
 -4 -4 2 7.1 1.38
 4 4 -2 4.97 1.85
 -4 4 2 7.07 1.3
 -4 4 2 7.62 2.26
 -4 -4 2 7.55 1.92
 -4 4 2 9.67 1.77
 -4 -4 1 24.25 2.62
 -4 4 1 27 2.66
 -4 4 1 28.53 4.53
 -4 -4 1 21.03 3.53
 -4 4 1 36.49 3.88
 4 4 -1 31.15 4.41
 4 4 0 5.59 2
 -4 4 0 3.39 0.93
 -4 -4 0 3.64 0.98
 -4 4 0 4.77 1.89
 -4 -4 0 3.2 1.61
 -4 4 0 6.4 1.77
 -4 4 -1 41.64 5.67
 -4 -4 -1 40.2 5.18
 -4 -4 -1 40.53 3.7
 -4 4 -1 49.43 5.45
 -4 4 -1 40.94 3.82
 4 4 1 45.26 6.01
 -4 4 -2 45.54 4.41
 -4 4 -2 47.2 6.18
 -4 -4 -2 45.24 5.75
 -4 -4 -2 43.18 4.24
 -4 4 -2 62.04 6.66
 4 4 2 52.12 6.72
 -4 -4 -3 412.89 18.03
 -4 4 -3 440.41 22.49
 -4 -4 -3 406.25 20.71
 -4 4 -3 423.19 18.47
 4 4 3 472.68 23.88
 -4 4 -4 2.46 1.47
 -4 4 -4 4.5 2.19
 -4 -4 -4 3.53 1.98
 -4 -4 -4 2.55 1.3
 -4 4 -4 1.77 1.02
 4 4 4 3.67 1.8
 -4 -4 -5 146.31 10.6
 -4 4 -5 165.65 13.78
 -4 -4 -5 154.44 12.35
 4 -4 5 151.01 11.49
 -4 4 -5 176.54 14.09
 4 4 5 162.33 14.11
 -4 4 -5 163.74 11.5
 -4 -4 -6 110.18 9.55
 -4 4 -6 122.53 10.29
 -4 -4 -6 107.95 10.5
 4 -4 6 100.89 9.59
 -4 4 -6 122.32 12.21
 4 4 6 116.86 12.04
 -4 -4 -7 140.87 11.72
 -4 4 -7 142.87 11.87
 4 -4 7 137.47 11.75
 -4 4 -7 167.18 15.01
 4 4 7 139.44 13.56
 -4 -4 -8 56.71 7.9
 4 -4 8 56.06 7.66
 -4 4 -8 66.1 9.51
 4 4 8 62.03 9.13
 -4 4 -8 61.45 8.2
 -4 -4 -8 65.28 8.33
 -4 -4 -9 43.07 7.37
 -4 4 -9 53.48 9.05
 -4 4 -9 41.93 6.81
 -4 -4 -10 19.75 5.12
 -4 4 -10 17.19 5.47
 -4 -4 -11 4.21 2.37
 -4 4 -11 2.42 2.23
 -4 4 -12 150.91 17.58
 -4 -4 -12 158.69 18.35
 -4 -4 -13 3.64 3.8
 -4 4 -13 0.17 1.9
 -4 4 -14 204.5 22.9
 -4 -4 -14 247.05 25.96
 -4 -4 -15 3.53 3.1
 -4 4 -15 -0.71 0.45
 -4 4 -16 217.84 24.55
 -4 -4 -16 212.24 24.43
 -4 -4 -17 44.73 11.45
 -4 4 -17 42.1 10.66
 -4 -4 -18 5.73 2.54
 -4 4 -18 8.57 4.56
 -4 -4 -19 11.33 5.74
 -4 4 -19 13.53 6.58
 -4 5 21 15.1 8.21
 4 -5 -20 1.97 1.01
 -4 5 20 18.1 9.68
 -4 -5 20 10.14 7
 4 -5 -19 34.6 7.42
 -4 5 19 27.22 13.25
 4 5 -19 32.22 7.51
 -4 -5 19 43.16 14.63
 4 -5 -18 22.26 5.8
 4 5 -18 19.93 5.74
 -4 -5 18 13.8 9.17
 4 -5 -17 19.64 5.06
 4 5 -17 12.77 4.48
 4 -5 -16 3.07 1.46
 4 5 -16 3.53 1.94
 4 -5 -15 5.93 2.14
 4 5 -15 4.49 2.49
 4 -5 -14 70.82 8.61
 4 5 -14 61.46 8.52
 4 -5 -13 8.84 2.79
 4 5 -13 4.02 1.48
 -4 5 13 3.58 1.36
 4 5 -13 9.15 3.26
 4 5 -12 -0.36 1.03
 -4 5 12 0.02 0.38
 4 5 -11 14.11 3.12
 -4 5 11 11.6 2.61
 4 5 -10 0.79 0.56
 4 5 -10 0.39 0.52
 -4 5 10 -0.08 0.14
 4 -5 -10 1.12 1.01
 4 -5 -9 84.01 6.71
 4 5 -9 63.56 6.52
 -4 5 9 61.99 5.81
 4 5 -9 76.6 6.78
 4 -5 -8 2.3 1.16
 4 5 -8 3.51 1.34
 4 5 -8 3.65 1.38
 -4 5 8 4.32 1.4
 4 5 -7 2.84 0.93
 4 5 -7 3.39 1.44
 4 -5 -7 2.17 0.91
 -4 5 7 1.9 0.86
 4 -5 -6 245.99 11.24
 4 5 -6 257.08 11.76
 4 5 -6 196.29 10.87
 -4 5 6 172.8 15.61
 -4 5 6 195.68 9.83
 4 5 -5 159.64 9.13
 4 -5 -5 152.04 12.04
 4 5 -5 151.36 12.35
 4 -5 -5 156.33 8.81
 -4 5 5 162.71 8.55
 -4 5 5 121.24 10.72
 -4 -5 5 96.3 11.4
 -4 5 5 123.08 7.32
 -4 5 4 49.4 4.08
 4 5 -4 59.48 5.35
 4 -5 -4 54.5 6.99
 4 5 -4 62.58 7.56
 -4 5 4 57.12 6.56
 -4 5 4 61.63 5.05
 -4 -5 4 42.88 6.04
 4 -5 -4 51.35 4.82
 -4 -5 4 50.25 4.64
 4 5 -3 80.68 6.53
 -4 5 3 70.13 5.37
 4 5 -3 67.08 7.85
 -4 5 3 77.63 7.54
 4 -5 -3 75.76 5.94
 -4 -5 3 73.28 7.12
 -4 5 3 85.03 6.26
 -4 -5 3 69.67 5.41
 -4 5 2 7.51 1.61
 -4 5 2 5.05 1.74
 -4 5 2 9.22 1.97
 -4 -5 2 4.76 2.06
 -4 -5 2 6.72 1.49
 4 5 -1 9.69 2.74
 -4 5 1 7.95 2.3
 -4 -5 1 6.93 2.02
 -4 5 1 9.34 2.27
 -4 5 1 6.56 1.43
 -4 -5 1 6.96 1.51
 -4 5 0 10.41 1.88
 4 5 0 12.28 3.11
 -4 5 0 10.38 2.77
 -4 -5 0 9.02 1.82
 -4 -5 0 10.47 2.61
 -4 5 0 13.79 2.88
 4 5 1 1.61 0.96
 -4 -5 -1 0.68 0.55
 -4 5 -1 0.43 0.35
 -4 5 -1 1.26 1.31
 -4 -5 -1 1.58 1.19
 -4 5 -1 1.42 1.15
 4 5 2 0.45 0.55
 -4 5 -2 0.62 0.94
 -4 -5 -2 0.01 0.06
 -4 5 -2 -0.26 0.76
 -4 5 -2 1.48 0.93
 -4 -5 -2 0.92 0.61
 4 5 3 9.84 3.01
 -4 5 -3 8.03 2.19
 -4 5 -3 11.16 3.13
 -4 -5 -3 6.64 2.07
 -4 5 -3 11.5 3.03
 -4 -5 -3 6.46 1.84
 -4 -5 -4 272.55 14.78
 -4 5 -4 296.23 18.55
 -4 -5 -4 281.99 16.63
 -4 5 -4 294.8 15.55
 4 5 4 302.92 19.62
 -4 5 -5 12 2.82
 -4 5 -5 12.24 3.54
 -4 -5 -5 14.02 3.24
 -4 -5 -5 10.72 2.59
 -4 5 -5 10 3.21
 4 5 5 9.71 3.27
 -4 -5 -6 0.59 0.54
 -4 -5 -6 -0.26 0.64
 -4 5 -6 -0.81 0.95
 -4 5 -6 -0.14 0.71
 4 5 6 0.43 0.34
 -4 -5 -7 5.84 2.14
 -4 5 -7 7.03 2.35
 -4 5 -7 8.66 3.45
 4 5 7 9.9 3.55
 -4 5 -8 -0.9 1.77
 -4 -5 -8 -0.32 1.63
 4 -5 8 -0.3 1.12
 -4 5 -8 -2.17 2.85
 -4 -5 -9 82.61 9.81
 -4 5 -9 91.9 12.25
 -4 -5 -10 -0.19 0.57
 -4 5 -10 2.01 1.93
 -4 -5 -11 148.99 15.36
 -4 5 -11 142.9 16.67
 -4 -5 -11 148.61 14.94
 -4 -5 -12 31.13 7.27
 -4 -5 -12 23.93 6.2
 -4 -5 -13 2.6 2.6
 -4 5 -13 2.28 2.62
 -4 -5 -14 4.25 3.38
 -4 5 -14 2.39 2.71
 -4 -5 -15 128.87 17.06
 -4 5 -15 131.36 18.39
 -4 -5 -16 20.1 7.22
 -4 5 -16 21.68 7.5
 -4 -5 -17 20.75 7.13
 -4 5 -17 16.55 7.09
 -4 -5 -18 43.12 10.88
 -4 5 -18 40.54 10.69
 -4 -5 -19 1.99 0.76
 -4 5 -19 10.34 5.83
 -4 6 20 19.13 10.21
 -4 -6 20 9.92 6.25
 4 -6 -19 41.41 8.2
 4 6 -19 27.39 6.97
 -4 6 19 27.46 14
 -4 -6 19 31.76 10.91
 4 -6 -18 46.03 8.38
 4 6 -18 41.55 8.23
 -4 -6 18 19.04 10.51
 4 6 -17 4.31 3.12
 4 -6 -17 0.68 1.45
 -4 -6 17 5.07 8.01
 4 -6 -16 14.49 4.39
 4 6 -16 12.06 3.91
 4 -6 -15 5.58 2.29
 4 6 -15 4.9 1.76
 4 -6 -14 34.71 6.08
 4 6 -14 31.76 5.92
 4 6 -13 1.27 0.17
 4 -6 -13 2.63 1.38
 4 6 -13 2.2 1.38
 -4 6 13 -0.11 1.61
 4 6 -12 28.16 4.86
 4 -6 -12 35.51 5.27
 4 6 -12 25.43 4.85
 -4 6 12 22.56 4.15
 -4 6 11 36.93 5.21
 4 6 -11 44.82 5.84
 4 6 -10 0.26 0.12
 -4 6 10 0.16 0.54
 4 6 -9 8.13 2.3
 -4 6 9 8.13 2.37
 4 6 -8 123.26 8.85
 4 -6 -8 127.43 8.75
 -4 6 8 103.79 8.07
 4 6 -7 292.58 14.17
 4 6 -7 238.66 13.44
 -4 6 7 228.15 12.43
 4 -6 -7 309.91 14.26
 4 -6 -6 66.84 5.85
 4 6 -6 69.03 6.12
 4 6 -6 50.64 5.4
 -4 6 6 42.84 7.75
 -4 6 6 57.7 5.29
 -4 6 5 0.65 0.35
 4 6 -5 0.16 0.59
 4 -6 -5 0.91 0.84
 4 6 -5 0.16 0.36
 -4 6 5 0.81 0.88
 -4 6 4 8.06 1.96
 4 -6 -4 11.71 2.41
 4 -6 -4 7.08 2.44
 -4 -6 4 7.82 1.99
 4 6 -4 10.5 2.93
 4 6 -4 8.65 2.01
 -4 6 4 10.04 2.33
 -4 6 4 8.53 2.51
 -4 -6 4 4.83 1.56
 4 6 -3 7.48 2.41
 4 6 -3 8.87 2.22
 -4 6 3 7.56 1.78
 -4 -6 3 4.94 1.54
 -4 6 3 10.1 2.44
 -4 6 3 9.46 2.67
 -4 -6 3 7.66 2.33
 4 -6 -3 8.07 2.03
 4 -6 -2 4.22 1.43
 4 6 -2 4.36 1.88
 4 6 -2 4.09 1.63
 -4 6 2 2.43 1.05
 -4 6 2 4.78 1.76
 -4 6 2 2.66 1.05
 -4 -6 2 3.04 1.23
 -4 -6 2 4.57 1.79
 -4 -6 1 19.26 2.88
 -4 6 1 21.82 3.03
 -4 -6 1 18.38 3.38
 -4 6 1 31.32 4.52
 -4 6 1 19.47 3.8
 4 6 -1 28.77 5.38
 4 6 0 12.93 3.34
 -4 6 0 7.35 2.33
 -4 -6 0 7.07 2.1
 -4 -6 0 8.5 2.04
 -4 6 0 13.18 3.11
 -4 6 0 9.89 2.12
 4 6 1 -0.1 0.43
 -4 6 -1 0.81 0.37
 -4 -6 -1 -0.31 0.31
 -4 6 -1 1.68 1.45
 -4 -6 -1 0.67 1.01
 -4 6 -1 1.09 0.91
 4 6 2 23.38 4.93
 -4 6 -2 25.97 4.74
 -4 -6 -2 23.78 4.07
 -4 -6 -2 19.25 3.05
 -4 6 -2 29 4.85
 -4 6 -2 24.93 3.59
 -4 6 -3 59.19 5.95
 -4 6 -3 51.51 6.8
 -4 -6 -3 49.52 6.03
 -4 -6 -3 53.4 5.51
 -4 6 -3 62.74 7.79
 4 6 3 57.86 7.9
 -4 6 -4 52.03 6.01
 -4 6 -4 54.52 7.35
 -4 -6 -4 48.8 6.09
 -4 -6 -4 52.08 5.75
 -4 6 -4 63.77 8.11
 4 6 4 48.73 7.52
 -4 -6 -5 121.11 9.79
 -4 6 -5 146.02 12.83
 -4 -6 -5 132.06 10.79
 -4 6 -5 120.83 10.14
 -4 6 -5 156.32 13.74
 4 6 5 134.51 13.34
 -4 -6 -6 37.21 5.51
 -4 -6 -6 41.14 6.16
 -4 6 -6 39.96 5.88
 -4 6 -6 42.13 7.35
 4 6 6 34.38 6.79
 -4 -6 -7 123.63 10.95
 -4 -6 -7 117 11.25
 -4 6 -7 153.89 14.73
 -4 6 -7 122.54 11.35
 -4 -6 -8 41.62 6.41
 -4 6 -8 38.13 7.68
 -4 6 -8 38.12 6.5
 -4 -6 -9 3.19 1.9
 -4 6 -9 0.49 1.25
 -4 -6 -10 10.45 3.34
 -4 6 -10 12.18 4.74
 -4 -6 -11 134.17 13.8
 -4 6 -11 162.15 17.75
 -4 -6 -12 1.97 1.99
 -4 6 -12 1.28 0.62
 -4 -6 -13 7.6 3.86
 -4 6 -13 1.82 1.6
 -4 -6 -14 110.15 14.33
 -4 6 -14 118.6 16.82
 -4 -6 -15 4.03 2.79
 -4 6 -15 2.13 2.22
 -4 -6 -16 -1.38 2.18
 -4 -6 -16 2.48 0.79
 -4 6 -16 5.41 3.33
 -4 -6 -17 5.25 3.68
 -4 -6 -17 -0.21 1.7
 -4 6 -17 1.45 4.12
 -4 -6 -18 5.17 3.76
 -4 -6 -18 1.37 1.82
 -4 6 -18 6.18 5
 -4 -6 -19 132.8 18.77
 -4 7 20 6.73 5.87
 -4 -7 20 4.51 4.73
 4 -7 -19 34.44 7.93
 -4 7 19 30.68 13.6
 -4 -7 19 18.71 7.89
 4 -7 -18 49.87 8.69
 4 7 -18 37.94 7.9
 -4 7 18 31.93 14.56
 -4 -7 18 44.3 14.4
 4 -7 -17 2.56 2.26
 4 7 -17 3.05 1.53
 -4 -7 17 7.48 9.17
 4 -7 -16 8 3.26
 4 7 -16 4.39 2.45
 4 -7 -15 32.43 6.22
 4 7 -15 29.7 6.16
 4 -7 -14 149.73 12.99
 4 7 -14 127.48 12.41
 4 7 -13 5.13 2.05
 4 -7 -13 6.43 2.52
 4 -7 -12 40.94 6.08
 4 7 -12 28.01 5.2
 -4 7 12 24.04 4.61
 4 7 -12 34.54 5.58
 4 7 -11 124.37 10.93
 4 7 -11 143.77 11.48
 4 -7 -10 27.1 4.48
 4 7 -10 21.66 4.16
 4 7 -10 26.15 4.53
 -4 7 10 20.29 3.94
 4 7 -9 84.85 8.22
 -4 7 9 86.45 8.14
 -4 7 8 1.56 1.04
 4 7 -8 3.44 1.74
 4 7 -7 78.99 7.33
 -4 7 7 66.55 6.55
 -4 7 6 1.24 0.81
 4 7 -6 3.73 1.53
 -4 -7 6 2.37 2.94
 -4 7 5 51.98 5.31
 -4 7 5 51.85 7.24
 4 7 -5 62.51 6.48
 4 7 -5 55.89 7.4
 4 -7 -5 62.08 6.26
 -4 -7 5 49.74 5.47
 -4 -7 5 37.34 10.12
 4 -7 -4 1.54 0.89
 -4 7 4 1.45 0.63
 4 7 -4 2.34 1.46
 4 7 -4 1.95 1.1
 -4 7 4 0.27 0.68
 -4 -7 4 -1.71 2.97
 -4 -7 4 1.44 0.97
 4 7 -3 53 6.14
 -4 7 3 39.92 4.74
 4 7 -3 45.61 6.47
 -4 7 3 43.7 5.76
 -4 7 3 47.12 5.8
 -4 -7 3 40.67 5.69
 -4 -7 3 42.61 4.88
 4 -7 -3 52.17 6.08
 4 7 -2 1.87 1.1
 4 -7 -2 0.79 0.91
 -4 7 2 3.06 1.37
 -4 7 2 1.81 1.06
 -4 7 2 1.68 0.81
 -4 -7 2 2.92 1.34
 -4 -7 2 2.81 1.28
 4 7 -1 140.54 12.04
 -4 -7 1 101.64 7.69
 -4 7 1 115.37 8.18
 -4 7 1 113.15 9.56
 -4 -7 1 111.19 8.7
 -4 7 1 146.92 11.08
 4 7 0 17.12 4.52
 -4 7 0 12.24 3.01
 -4 7 0 13.77 3.48
 -4 -7 0 7.8 2.09
 -4 -7 0 10.42 2.3
 -4 7 0 10.83 2.35
 -4 7 -1 49.57 6.41
 -4 -7 -1 41.89 5.22
 -4 7 -1 55.47 7.17
 -4 7 -1 42.81 4.88
 -4 -7 -1 47.27 5.07
 4 7 1 48.65 7.31
 -4 7 -2 291.81 17.28
 -4 -7 -2 262.27 15.1
 -4 -7 -2 262.54 14.07
 -4 7 -2 294.36 14.96
 4 7 2 297.14 19.83
 -4 7 -3 139.76 11.64
 -4 -7 -3 126.18 9.88
 -4 -7 -3 121.29 8.98
 -4 7 -3 157.76 13.21
 4 7 3 135.43 13.2
 -4 7 -3 125.37 9.59
 -4 7 -4 32.86 4.84
 -4 7 -4 42.07 6.38
 -4 -7 -4 32.39 4.88
 -4 -7 -4 33.04 4.71
 -4 7 -4 46.47 7.25
 4 7 4 36.27 6.63
 4 7 5 1.77 1.16
 -4 7 -5 0.52 1.16
 -4 7 -5 0.35 0.36
 -4 -7 -5 0.13 0.92
 -4 7 -5 1.04 1.13
 -4 -7 -5 0.45 0.87
 -4 7 -6 39.39 6.87
 -4 -7 -6 32.98 5.22
 -4 -7 -6 36.47 5.64
 -4 7 -6 34.33 5.46
 -4 7 -6 40.87 7.37
 -4 -7 -7 110.73 10.51
 -4 -7 -7 134.98 11.7
 -4 7 -7 153.82 15.03
 -4 -7 -8 67.57 8.28
 -4 -7 -8 64.65 8.27
 -4 7 -8 80.9 11.17
 -4 -7 -9 5.55 2.3
 -4 7 -9 13.93 4.89
 -4 -7 -10 3.78 1.96
 -4 7 -10 4.63 2.42
 -4 -7 -11 12.68 4.08
 -4 7 -11 11.13 4.41
 -4 -7 -12 13.2 4.11
 -4 7 -12 16.32 5.75
 -4 -7 -13 83.33 11.79
 -4 7 -13 101.69 15.12
 -4 -7 -14 82.58 12.3
 -4 7 -14 116.8 16.63
 -4 -7 -15 -0.11 0.6
 -4 7 -15 4.69 3.55
 -4 -7 -16 24.92 7.02
 -4 7 -16 35.54 9.75
 -4 -7 -17 81.68 13.42
 -4 7 -17 94.14 16.45
 -4 -7 -18 2 1.99
 -4 7 -18 -0.03 2.39
 -4 8 20 20.51 8.35
 4 -8 -19 3.65 2.87
 -4 8 19 12 8.16
 -4 -8 19 1.76 2.65
 4 -8 -18 15.29 4.78
 4 8 -18 10.48 4.07
 -4 8 18 13.32 10.06
 -4 -8 18 9.89 7.68
 4 8 -17 101.99 12.58
 -4 -8 17 54.97 14.5
 4 -8 -16 11.9 3.94
 4 8 -16 4.96 2.52
 -4 -8 16 11.2 9.4
 4 -8 -15 61.37 8.6
 4 8 -15 38.64 7.1
 4 8 -14 20.27 4.84
 4 -8 -14 18.32 4.54
 4 8 -13 21.98 4.85
 4 -8 -13 32.48 5.64
 4 -8 -12 74.29 8.53
 4 8 -12 62.09 7.98
 4 8 -11 0.18 0.64
 -4 8 11 0.48 0.72
 4 -8 -10 17.94 3.94
 4 8 -10 12.14 3.2
 4 8 -10 11.93 3.05
 -4 8 10 9.27 3.02
 -4 8 9 15.53 3.52
 4 8 -9 23.63 4.4
 4 8 -9 19.22 3.98
 4 -8 -9 25.13 4.41
 4 8 -8 127.16 10.48
 4 8 -8 156.58 11.56
 -4 8 8 122.54 10.35
 4 8 -7 76.78 7.7
 4 8 -7 55.53 6.52
 -4 8 7 59.7 6.73
 -4 8 6 8.66 2.51
 -4 -8 6 7.71 2.22
 4 8 -6 8.71 2.55
 -4 8 6 10.74 5.47
 -4 8 5 0.42 1.4
 4 8 -5 1.39 1.15
 4 8 -5 1.48 0.24
 -4 -8 5 2 1.09
 -4 8 5 -1.94 3.08
 -4 -8 5 3.1 2.07
 -4 8 4 70.31 6.95
 4 8 -4 86.47 8.35
 4 8 -4 77.9 8.68
 -4 8 4 73.81 8.09
 -4 -8 4 67.83 6.83
 4 8 -3 148.4 11.47
 -4 8 3 129 9.56
 -4 8 3 115.31 10.29
 -4 8 3 141.52 10.84
 -4 -8 3 109.23 11.19
 -4 -8 3 126.2 9.4
 4 8 -2 1.38 1.19
 -4 8 2 1 0.94
 -4 8 2 0.47 0.32
 -4 8 2 1.33 1.11
 -4 -8 2 1.84 0.8
 -4 -8 2 1.41 0.69
 4 8 -1 293.91 18.95
 -4 -8 1 250.77 13.94
 -4 8 1 274.95 14.74
 -4 8 1 282.46 16.14
 -4 -8 1 258.42 14.6
 -4 8 1 326.1 18.7
 4 8 -1 300.17 18.11
 4 8 0 17.85 4.72
 -4 8 0 19.5 3.92
 -4 8 0 26.85 5.06
 -4 -8 0 16.6 3.12
 -4 -8 0 16.64 3.1
 -4 8 0 17.29 3.19
 -4 8 -1 200.02 13.68
 -4 -8 -1 166 11.14
 -4 8 -1 226.95 15.9
 -4 8 -1 180.72 11.57
 -4 -8 -1 178.71 11.31
 4 8 1 241.72 18.85
 -4 8 -2 65.73 7.67
 -4 -8 -2 63.95 6.59
 -4 8 -2 81.42 9.48
 -4 -8 -2 62.14 6.37
 -4 8 -2 72.03 7.05
 4 8 2 75.52 9.81
 4 8 3 32.57 6.53
 -4 8 -3 34.11 5.55
 -4 -8 -3 29.23 4.54
 -4 8 -3 49.75 7.54
 -4 -8 -3 36.59 4.96
 -4 8 -3 33.59 4.91
 -4 8 -4 2.46 1.41
 -4 -8 -4 2.29 1.6
 -4 8 -4 1.76 1.92
 -4 8 -4 0.38 0.48
 -4 -8 -4 1.85 1.15
 -4 8 -5 163.58 12.51
 -4 8 -5 189.32 14.84
 -4 -8 -5 151.32 11.48
 -4 -8 -5 163.18 11.92
 -4 8 -6 90.57 10.47
 -4 -8 -6 85.15 8.58
 -4 -8 -6 77.37 8.31
 -4 8 -6 96.46 11.65
 -4 -8 -7 104.96 9.99
 -4 -8 -7 102.88 10.16
 -4 8 -7 124.91 13.82
 -4 -8 -8 12.54 3.59
 -4 -8 -8 13.23 3.66
 -4 8 -8 12.78 4.88
 -4 -8 -9 4.08 1.86
 -4 8 -9 6.1 2.45
 -4 -8 -10 0.96 1.39
 -4 8 -10 2.19 2.26
 -4 -8 -11 27.33 6.09
 -4 8 -11 32.27 8.13
 -4 -8 -12 6.47 2.42
 -4 8 -12 10.35 4.22
 -4 -8 -13 22.19 5.88
 -4 8 -13 21.41 7.21
 -4 -8 -14 13.35 4.8
 -4 8 -14 15.72 6.51
 -4 -8 -15 1.04 2.34
 -4 8 -15 -0.96 2.12
 -4 -8 -16 8.12 3.81
 -4 8 -16 3.3 3.21
 -4 -8 -17 1.56 1.83
 -4 8 -17 3.75 4.15
 -4 -8 -18 36.72 9.22
 -4 9 20 9.73 6.66
 -4 9 19 25.1 9.53
 -4 -9 19 14.65 7.02
 4 9 -18 5.86 2.81
 4 -9 -18 12.3 4.28
 -4 9 18 12.95 9.91
 -4 -9 18 3.28 4.16
 4 9 -17 1.08 1.04
 4 -9 -17 3.05 2.25
 -4 9 17 14.84 9.68
 -4 -9 17 10.16 6.05
 4 9 -16 8.47 3.91
 4 -9 -16 10.39 3.63
 -4 -9 16 15.35 9.81
 4 9 -15 25.62 5.85
 4 -9 -15 31.18 6.19
 4 -9 -14 42.71 7.05
 4 9 -14 27.12 5.77
 4 -9 -13 1.59 1.67
 4 9 -13 -0.19 0.91
 4 9 -12 38.14 6.47
 4 -9 -12 63.07 8.11
 4 -9 -11 -0.33 0.53
 4 9 -11 1.01 1.07
 -4 9 10 7.85 2.49
 4 -9 -10 13.41 3.51
 4 9 -10 12.32 3.47
 -4 9 9 16.13 3.82
 4 9 -9 19.33 4.04
 4 -9 -9 16.91 3.83
 4 9 -9 15.4 3.69
 4 9 -8 118.75 10.49
 4 9 -8 87.23 8.88
 4 -9 -8 133.34 10.8
 -4 9 8 79.15 8.71
 -4 9 7 14 3.49
 4 9 -7 11.34 3.01
 4 9 -7 13.39 3.43
 4 -9 -7 18.92 3.8
 -4 9 6 5.82 1.97
 4 -9 -6 5.43 1.66
 -4 -9 6 5.51 1.76
 4 9 -6 5.31 1.85
 -4 9 6 12.04 6.58
 -4 9 5 0.34 0.56
 -4 -9 5 0.84 0.61
 4 9 -5 -0.14 0.91
 4 -9 -5 -0.12 0.6
 4 9 -5 1.53 1.25
 4 -9 -4 7.32 2.61
 4 9 -4 6.58 2.39
 -4 9 4 6.02 2.15
 4 9 -4 9.02 2.93
 -4 -9 4 7.96 2.4
 -4 9 4 4.84 1.83
 -4 -9 4 4.97 4.16
 -4 -9 3 2.98 1.48
 4 9 -3 3.24 1.68
 -4 9 3 3.74 1.69
 4 -9 -3 5.89 2.18
 -4 9 3 3.57 1.43
 -4 -9 3 4.17 2.17
 4 -9 -2 90.87 9.2
 4 9 -2 83.09 9.17
 -4 9 2 66.66 7.07
 -4 -9 2 69.4 6.96
 -4 9 2 82.26 8.04
 -4 9 2 63.5 8.04
 -4 -9 2 54.28 7.18
 4 9 -1 135.97 12.27
 -4 -9 1 120.99 9.41
 -4 9 1 129.52 9.97
 -4 9 1 123.69 10.14
 -4 9 1 120.53 11.49
 -4 -9 1 105.56 8.86
 4 9 0 175.06 15.43
 -4 9 0 156.48 11.78
 -4 9 0 153.78 10.98
 -4 -9 0 140.61 10.14
 -4 9 0 174.89 14.26
 4 -9 0 200.26 14.35
 -4 -9 0 143.32 10.45
 -4 9 -1 301.52 17.37
 -4 -9 -1 245.16 14.11
 -4 9 -1 277.39 15.69
 -4 9 -1 305.94 19.85
 -4 -9 -1 271.74 15.32
 -4 9 -2 15.88 3.51
 -4 -9 -2 12.86 2.88
 -4 9 -2 16.5 3.82
 -4 -9 -2 12.33 2.56
 -4 9 -2 9.84 3.4
 -4 9 -3 173.67 13.16
 -4 -9 -3 141.96 10.34
 -4 -9 -3 148.38 10.96
 -4 9 -3 144.32 11.46
 -4 9 -4 399.06 21.83
 -4 -9 -4 342.69 18.31
 -4 -9 -4 359.77 19.25
 -4 9 -5 36.98 7.26
 -4 9 -5 32.05 5.92
 -4 -9 -5 26.58 4.43
 -4 -9 -5 24.92 4.62
 -4 9 -6 18.54 4.76
 -4 -9 -6 13.75 3.29
 -4 9 -6 15.8 4.85
 -4 -9 -6 10.55 3.01
 -4 9 -7 14.52 4.23
 -4 -9 -7 16.81 3.81
 -4 9 -7 15.17 4.91
 -4 -9 -7 10.9 3.1
 -4 -9 -8 67.97 8.11
 -4 -9 -8 77.61 9.19
 -4 9 -8 84.86 12.18
 -4 -9 -9 23.45 4.87
 -4 -9 -9 24.93 5.4
 -4 9 -9 21.42 6.41
 -4 -9 -10 0.1 0.79
 -4 9 -10 2.14 2.48
 -4 -9 -11 21.79 5.4
 -4 9 -11 25.39 7.16
 -4 -9 -12 9.99 3.9
 -4 9 -12 9.56 4.67
 -4 -9 -13 4.36 2.59
 -4 9 -13 5.69 3.49
 -4 -9 -14 18.18 5.39
 -4 9 -14 22.86 7.43
 -4 -9 -15 -1.08 2.27
 -4 9 -15 0.47 1.5
 -4 -9 -16 22.3 6.66
 -4 9 -16 11.82 5.62
 -4 -9 -17 2.65 2.15
 -4 9 -17 3.91 2.48
 -4 10 20 21.95 8.48
 -4 10 19 7.68 6.86
 4 10 -18 3.2 2.6
 -4 10 18 8.67 6.87
 -4 -10 18 5.54 4.45
 4 10 -17 5.29 2.94
 4 -10 -17 8.63 3.2
 -4 -10 17 5.55 4.38
 4 10 -16 0.62 0.52
 -4 10 16 3.76 5.48
 4 -10 -16 2.04 1.76
 4 10 -15 16.7 4.72
 -4 -10 15 6.14 6.4
 4 -10 -14 1.04 1.39
 4 10 -14 -0.12 0.63
 -4 -10 14 2.69 5.65
 4 10 -13 99.41 11.31
 4 -10 -13 146.99 13.38
 4 -10 -12 9.6 3.18
 4 10 -12 8.4 3.18
 4 10 -11 28.55 5.47
 4 -10 -11 46.42 7
 4 -10 -10 1.06 1.26
 4 10 -10 0.51 1.17
 4 10 -9 21.15 4.43
 4 -10 -9 22.45 4.66
 4 10 -8 124.92 11.15
 -4 10 8 109.52 10.93
 4 -10 -7 80.06 8.86
 -4 10 7 68.13 8.95
 -4 -10 6 1.61 1.26
 -4 10 6 1.58 1.42
 4 -10 -6 0.08 0.57
 -4 10 6 5.8 5.6
 -4 -10 5 0.23 0.21
 -4 10 5 -0.09 0.4
 4 10 -5 1.05 1.09
 4 10 -5 -0.82 1.13
 4 -10 -5 1.51 1.51
 4 -10 -4 19.32 4.27
 -4 10 4 11.38 2.99
 4 10 -4 17.94 4.16
 -4 -10 4 15.12 3.46
 -4 10 4 4 2.2
 4 10 -3 46.74 7.04
 -4 10 3 37.17 5.57
 -4 10 3 39.62 5.79
 -4 -10 3 38.52 5.56
 4 -10 -3 52.88 7.29
 4 10 -2 279.29 18.82
 -4 10 2 250.82 15.73
 -4 -10 2 270.63 15.77
 -4 10 2 299.59 16.66
 -4 10 2 208.27 16.81
 -4 -10 2 183.13 17.11
 4 -10 -2 356.18 20.2
 4 10 -1 50.29 7.69
 -4 -10 1 39.77 5.49
 -4 10 1 33.99 5.2
 4 -10 -1 54.55 7.6
 -4 10 1 48.23 6.07
 -4 10 1 37 6.59
 -4 -10 1 39.18 5.76
 -4 -10 0 382.39 19.5
 -4 10 0 364.53 19.68
 -4 10 0 397.73 20.23
 -4 -10 0 380.02 18.55
 -4 10 0 354.67 23.18
 -4 10 -1 281.68 16.68
 -4 10 -1 259.4 15.9
 -4 -10 -1 248.67 14.12
 -4 10 -1 263.17 19.44
 -4 -10 -1 259.64 15.54
 -4 10 -2 2.19 1.5
 -4 -10 -2 0.68 0.9
 -4 10 -2 0.85 1.5
 -4 -10 -2 -0.14 0.5
 -4 10 -3 27.84 5.03
 -4 -10 -3 17.99 3.7
 -4 10 -3 24.32 5.82
 -4 -10 -3 13.83 2.92
 -4 -10 -4 7.16 2.58
 -4 10 -4 9.91 3.29
 -4 -10 -4 9.97 2.75
 -4 10 -4 11.94 4.26
 -4 10 -5 53.64 7.46
 -4 -10 -5 52.26 6.24
 -4 -10 -5 51.17 6.79
 -4 10 -5 63.24 9.92
 -4 10 -6 0.13 0.9
 -4 -10 -6 1.39 1.04
 -4 10 -6 2.32 1.53
 -4 -10 -6 1.63 1.68
 -4 10 -7 78.37 10.03
 -4 -10 -7 68.27 7.52
 -4 -10 -7 70.34 8.49
 -4 10 -7 79.15 11.76
 -4 10 -8 40.42 7.46
 -4 -10 -8 31.79 5.35
 -4 10 -8 30.61 7.3
 -4 -10 -8 25.08 5.27
 -4 -10 -9 7.93 2.79
 -4 10 -9 9.85 4.85
 -4 -10 -9 8.55 3.25
 -4 -10 -10 33.78 6.06
 -4 -10 -10 34.62 6.54
 -4 10 -10 30.87 8.2
 -4 -10 -11 1.49 0.66
 -4 -10 -11 0.54 0.72
 -4 -10 -12 -0.53 1.08
 -4 10 -12 -0.22 1.56
 -4 -10 -13 32.89 7.15
 -4 10 -13 43.52 10.24
 -4 -10 -14 5.58 3.24
 -4 10 -14 6.81 4.69
 -4 -10 -15 1.76 1.26
 -4 10 -15 4.78 2.04
 -4 -10 -16 0.41 0.76
 -4 10 -16 -1.98 1.32
 -4 11 19 8.22 6.05
 -4 11 18 12.84 7.14
 4 -11 -17 42.45 8.2
 4 11 -17 32.64 7.25
 -4 11 17 25.09 9.98
 -4 -11 17 27.45 8.55
 4 -11 -16 17.16 5.1
 4 11 -16 14.01 4.57
 -4 11 16 13.02 9.63
 -4 -11 16 10.32 4.78
 4 -11 -15 11.64 4.14
 4 11 -15 5.79 2.96
 -4 -11 15 3.57 4.43
 4 -11 -14 29.16 6.35
 4 11 -14 20.84 5.37
 -4 -11 14 18.99 9.89
 4 -11 -13 2.9 2.15
 4 11 -13 -1.19 1.26
 -4 -11 13 1.48 6.58
 4 -11 -12 30.79 6.01
 4 11 -12 20.36 4.88
 4 11 -11 38.78 6.72
 4 -11 -11 61.42 8.44
 4 11 -10 8.56 3.2
 4 -11 -10 14.99 4.17
 4 11 -9 62.53 8.19
 4 -11 -9 87.59 9.84
 4 11 -8 3.73 1.67
 4 -11 -8 4.61 2.57
 4 -11 -7 265.8 17.79
 -4 -11 7 205.03 15.43
 4 -11 -6 59.23 7.97
 -4 -11 6 56.56 7.47
 -4 -11 5 117.79 10.92
 4 11 -5 132.97 11.98
 4 -11 -5 151.02 13.18
 4 -11 -4 3.1 1.87
 -4 -11 4 0.79 1.04
 -4 11 4 -0.95 2.72
 -4 11 3 220.37 16.48
 -4 -11 3 229.5 15.54
 -4 11 2 0.39 0.56
 -4 11 2 3.57 1.79
 -4 -11 2 2.19 1.21
 4 -11 -2 2.39 1.31
 -4 -11 2 1.61 1.47
 4 -11 -1 15.39 4.21
 -4 -11 1 10.4 2.76
 -4 11 1 5.75 1.93
 -4 11 1 13.56 3.38
 -4 -11 1 4.95 1.68
 -4 -11 0 -0.17 0.52
 -4 11 0 -0.02 0.14
 -4 11 0 -1.13 0.9
 -4 -11 0 -0.8 1.62
 4 -11 0 0.79 1.41
 -4 11 -1 148.46 11.51
 -4 -11 -1 133.28 9.78
 -4 11 -1 136.14 14.2
 4 -11 1 170.4 14.86
 -4 -11 -1 126.04 10.82
 -4 11 -2 16.72 3.81
 -4 11 -2 13.33 4.19
 -4 -11 -2 18.05 3.97
 -4 -11 -2 11.59 2.83
 -4 11 -3 108.93 10.26
 -4 -11 -3 86.28 7.55
 -4 11 -3 92.46 11.95
 -4 -11 -3 98.11 9.56
 -4 11 -4 34.21 5.8
 -4 -11 -4 30.47 4.4
 -4 11 -4 30.96 7.1
 -4 -11 -4 26.74 4.91
 -4 -11 -5 19.19 4.18
 -4 -11 -5 22.39 3.88
 -4 11 -5 23.5 4.83
 -4 11 -5 24.68 6.37
 -4 -11 -6 4.71 2.21
 -4 11 -6 5.75 2.57
 -4 -11 -6 4.79 1.74
 -4 11 -6 6.22 3.55
 -4 11 -7 9.24 3.38
 -4 -11 -7 7.09 2.42
 -4 11 -7 5.69 2.56
 -4 -11 -7 6.05 2.68
 -4 11 -8 -0.24 1
 -4 -11 -8 1.2 0.8
 -4 11 -8 3.37 2.93
 -4 -11 -8 1.63 1.7
 -4 -11 -9 1.4 1.1
 -4 11 -9 0.23 0.42
 -4 -11 -9 -0.4 0.87
 -4 -11 -10 1.72 1.76
 -4 11 -10 4.32 3.55
 -4 -11 -10 1.84 2.34
 -4 -11 -11 74.5 9.27
 -4 -11 -11 68.41 9.94
 -4 11 -11 66.66 12.21
 -4 -11 -12 119.09 12.49
 -4 -11 -12 130.2 14.41
 -4 11 -12 146.08 18.61
 -4 -11 -13 9.17 4.09
 -4 11 -13 4.99 3.89
 -4 -11 -14 15.77 4.91
 -4 11 -14 25.22 8.08
 -4 -11 -15 3.75 3.22
 -4 11 -15 1.48 2.39
 4 12 -17 3.65 2.62
 4 -12 -16 0.99 1.23
 4 12 -16 2.13 1.7
 -4 -12 16 1.38 1.12
 4 -12 -15 8.7 3.82
 4 12 -15 3.07 2.04
 -4 -12 15 8.29 4.57
 4 -12 -14 2.78 2.33
 4 12 -14 2.1 1.56
 -4 -12 14 8.12 5.01
 4 -12 -13 12.36 3.75
 4 12 -13 12.48 4.13
 -4 -12 13 17.09 7.9
 4 -12 -12 1.98 1.48
 4 12 -12 0.47 0.64
 -4 -12 12 2.98 4.1
 4 12 -11 -0.94 1.43
 4 -12 -11 -0.18 0.76
 4 12 -10 21.34 4.99
 4 -12 -10 35.26 6.76
 4 12 -9 7.08 2.98
 4 -12 -9 2.21 1.98
 4 -12 -8 202.09 16.05
 4 12 -8 142.59 13.23
 4 -12 -7 1.5 1.77
 -4 -12 7 0.93 1.16
 4 -12 -6 21.68 5.15
 -4 -12 6 17.05 4.16
 -4 -12 5 72.88 8.74
 4 -12 -5 91.81 10.64
 4 -12 -4 36.51 6.77
 -4 -12 4 24.65 4.94
 -4 12 4 20.75 7.48
 -4 -12 3 2.16 1.47
 4 -12 -3 4.8 2.53
 -4 12 3 0.09 3.42
 -4 12 2 29.81 5.26
 -4 -12 2 23.38 4.84
 4 -12 -2 35.52 6.69
 4 -12 -1 0.3 1.41
 -4 -12 1 -0.74 1.61
 -4 12 1 -0.38 0.12
 -4 12 1 -0.62 1.17
 -4 -12 0 -0.14 0.87
 -4 12 0 0.67 1.24
 -4 12 0 0.26 0.94
 4 -12 0 -0.66 1.61
 -4 12 -1 0.43 1.34
 -4 12 -1 0.32 0.95
 4 -12 1 3.75 2.32
 -4 -12 -1 1.94 0.79
 -4 -12 -1 0.42 0.91
 -4 12 -2 254.32 15.88
 -4 -12 -2 242.17 13.64
 -4 12 -2 194.99 18.47
 -4 -12 -2 239.02 16.06
 -4 12 -3 0.89 1.47
 -4 -12 -3 -0.37 0.86
 -4 12 -3 -1.06 1.15
 -4 -12 -3 0.48 0.84
 -4 -12 -4 1.12 1.4
 -4 12 -4 1.77 1.84
 -4 12 -4 2.49 2.55
 -4 -12 -4 -0.34 0.45
 -4 -12 -5 9.05 2.99
 -4 12 -5 11.02 3.38
 -4 -12 -5 10.26 2.57
 -4 12 -5 10.81 4.52
 -4 -12 -6 5.29 2.68
 -4 12 -6 5.2 2.86
 -4 -12 -6 5.57 2.09
 -4 12 -6 4.73 3.12
 -4 -12 -7 1.66 1.68
 -4 12 -7 2.51 1.64
 -4 -12 -7 3.57 1.71
 -4 12 -7 7.17 3.73
 -4 -12 -8 13.35 4.04
 -4 12 -8 14.64 4.55
 -4 -12 -8 11.05 3.14
 -4 12 -8 10.29 4.54
 -4 12 -9 16.22 4.92
 -4 -12 -9 11.94 3.09
 -4 12 -9 13.05 5.34
 -4 -12 -9 17.64 4.7
 -4 -12 -10 0.74 1.12
 -4 12 -10 -2.31 3.69
 -4 -12 -10 -1.26 1.33
 -4 12 -11 14.16 5.81
 -4 -12 -11 14.34 4.61
 -4 12 -12 7.5 4.4
 -4 -12 -12 16.6 5.05
 -4 -12 -13 129.89 14.89
 -4 12 -13 122.44 17.83
 -4 -12 -14 22.67 6.42
 -4 12 -14 31.19 9.09
 4 13 -16 2.33 2.05
 4 -13 -15 19.05 5.35
 4 13 -15 8.77 3.55
 4 -13 -14 0.16 1.87
 4 13 -14 0.62 1.44
 4 -13 -13 5.68 2.74
 4 13 -13 3.73 2.54
 4 13 -12 14.5 4.39
 4 -13 -12 15.04 4.81
 -4 -13 12 4.76 4.24
 4 13 -11 33.69 6.69
 -4 -13 11 23.65 10.41
 4 -13 -11 48.99 8.4
 4 13 -10 89.11 11
 4 -13 -10 132.98 13.7
 4 -13 -9 62.46 9.26
 4 13 -9 49.58 7.89
 4 -13 -8 187.27 16.28
 4 13 -8 144.52 13.67
 4 -13 -7 10.68 3.86
 -4 -13 7 4.86 2.81
 -4 -13 6 1.38 1.41
 4 -13 -6 0.97 0.48
 4 -13 -5 0.97 1.77
 -4 -13 5 1.83 1.7
 4 -13 -4 27.27 5.96
 -4 -13 4 16.31 4.08
 -4 -13 3 112.6 11.31
 4 -13 -3 137.53 14.01
 -4 -13 2 2.21 1.79
 -4 13 2 -1.2 2.23
 4 -13 -2 2.51 1.62
 -4 -13 1 72.66 8.77
 -4 13 1 80.9 8.51
 -4 -13 0 0.15 0.79
 -4 13 0 2.16 1.68
 4 -13 0 1.32 1.17
 -4 13 0 3.49 1.93
 -4 -13 0 -0.17 1.76
 -4 -13 -1 11.23 3.37
 4 -13 1 11.5 3.97
 -4 13 -1 3.54 2.06
 -4 13 -1 7.83 2.49
 -4 -13 -1 5.81 3.03
 -4 13 -2 200.65 13.65
 -4 -13 -2 174.75 14.07
 -4 13 -3 2.9 1.79
 -4 13 -3 3.67 2.88
 -4 -13 -3 -0.04 1.09
 -4 13 -4 0.6 1.22
 -4 -13 -4 -0.85 0.85
 -4 13 -4 2.02 1.08
 -4 -13 -5 25.75 5.31
 -4 13 -5 28.42 5.33
 -4 13 -5 19.8 6.13
 -4 13 -6 55.03 7.8
 -4 13 -6 42.76 9.17
 -4 -13 -6 53.93 7.97
 -4 -13 -7 28.49 5.89
 -4 13 -7 26.16 5.76
 -4 13 -7 26.13 7.14
 -4 -13 -8 13.4 4.22
 -4 13 -8 15.48 4.45
 -4 13 -8 16 5.73
 -4 -13 -9 4.64 2.58
 -4 13 -9 3.91 1.44
 -4 13 -9 5.05 2.99
 -4 13 -10 44.44 8.23
 -4 13 -10 26.58 7.41
 -4 -13 -10 32.27 6.81
 -4 13 -11 15.75 4.99
 -4 13 -11 15.32 6.23
 -4 -13 -11 17.07 5.16
 -4 -13 -12 56.74 9.46
 -4 13 -12 52.62 11.63
 -4 13 -13 44.52 10.7
 -4 -13 -13 38.34 8.47
 4 14 -15 3.2 1.92
 4 -14 -14 -0.54 1.72
 4 14 -14 -1.52 1.84
 4 14 -13 107.68 13.2
 4 -14 -13 162.19 16.72
 4 14 -12 24.54 6.02
 4 -14 -12 42 8.35
 4 14 -11 19.75 5.27
 4 -14 -11 28.83 6.8
 4 14 -10 -0.07 0.95
 4 -14 -10 1.39 1.49
 4 -14 -9 6.65 2.84
 4 14 -9 9.32 3.54
 4 -14 -8 1.08 0.53
 4 14 -8 1.3 1.03
 4 -14 -7 41.02 7.62
 -4 -14 7 33 6.32
 -4 -14 6 1.56 0.84
 4 -14 -6 -0.23 1.2
 4 -14 -5 1.36 1.65
 -4 -14 5 1.27 2.09
 4 -14 -4 0.53 1.25
 -4 -14 4 -0.72 1.39
 -4 -14 3 1.18 1.1
 4 -14 -3 1.02 0.26
 -4 -14 2 6.04 2.82
 4 -14 -2 10.17 4.25
 4 -14 -1 -0.48 0.92
 -4 14 1 -0.04 1.38
 -4 -14 1 1.52 2.15
 -4 -14 0 12.86 3.77
 -4 14 0 4.33 2.85
 4 -14 0 13.36 4.33
 -4 -14 -1 187.74 15.25
 -4 14 -1 212.25 13.99
 -4 14 -1 135.04 16.38
 4 -14 1 263.3 21.2
 4 -14 2 0.93 1.6
 -4 14 -2 -0.46 1.41
 -4 14 -2 -0.33 0.81
 -4 -14 -2 1.31 1.83
 -4 14 -3 1.76 1.55
 -4 14 -3 6.01 2.34
 -4 -14 -3 5.14 2.39
 -4 14 -4 12.26 3.33
 -4 14 -4 9.01 4.05
 -4 -14 -4 9.14 3.05
 -4 14 -5 4.85 2.33
 -4 -14 -5 5.02 3.02
 -4 14 -5 5.25 3.35
 -4 -14 -6 2.97 2
 -4 14 -6 5.43 2.79
 -4 14 -6 5.03 4.07
 -4 14 -7 118.36 16.23
 -4 -14 -7 116.82 12.65
 -4 -14 -8 0.84 0.7
 -4 14 -8 -0.08 1.75
 -4 -14 -9 3.05 2.24
 -4 14 -9 2.62 2.52
 -4 -14 -10 0.33 1.17
 -4 14 -10 2.41 1.33
 -4 -14 -11 2.95 1.72
 -4 14 -11 1.27 2.72
 4 15 -13 11.83 4.21
 4 -15 -13 18.45 5.85
 4 15 -12 7.32 3.42
 4 -15 -12 13.61 4.97
 4 15 -11 19.1 5.35
 4 -15 -11 28.97 6.79
 4 -15 -10 1.45 1.72
 4 15 -10 0.15 1.13
 4 -15 -9 3.49 2.32
 4 15 -9 3.17 2.13
 4 -15 -8 12.65 4.42
 4 15 -8 6.35 2.73
 -4 -15 7 0.77 1.37
 4 -15 -7 0.56 1.59
 4 -15 -6 16.56 5.09
 -4 -15 6 11.46 4.1
 -4 -15 5 25.49 5.84
 4 -15 -5 42.88 8.35
 4 -15 -4 9.22 3.45
 -4 -15 4 7.98 3.06
 -4 -15 3 36.15 6.83
 4 -15 -3 46.19 8.76
 -4 -15 2 6.9 2.81
 4 -15 -2 10.51 3.76
 4 -15 -1 9.26 4.29
 -4 15 1 6.3 3.44
 -4 -15 1 4.4 2.37
 4 -15 0 73.38 11.29
 -4 -15 0 49.18 7.91
 -4 -15 -1 8.71 3.24
 4 -15 1 12.29 4.41
 -4 15 -1 8.25 4.15
 -4 -15 -2 28.67 5.98
 -4 15 -2 21.59 6.61
 4 -15 2 41.61 8.65
 -4 15 -3 2.99 2.41
 -4 -15 -3 0.73 0.95
 -4 15 -4 6.89 4.02
 -4 -15 -4 9.62 3.48
 -4 15 -5 33.53 8.49
 -4 -15 -5 45.15 7.73
 -4 -15 -6 0.67 0.91
 -4 15 -6 -1.79 2.93
 -4 -15 -7 15.24 4.54
 -4 15 -7 10.23 4.62
 -4 -15 -8 11.89 3.88
 -4 15 -8 12.33 5.52
 -4 -15 -9 3.87 2.48
 -4 15 -9 -5.32 3.53
 -4 15 -10 0.43 1.1
 4 -16 -11 39.94 8.44
 4 16 -11 30.04 6.9
 4 -16 -10 58.49 10.83
 4 16 -10 27.31 6.71
 4 -16 -9 34.68 8.04
 4 16 -9 26.4 6.27
 4 16 -8 12.2 4.57
 4 -16 -8 17.96 5.71
 -4 -16 7 6.69 2.45
 4 -16 -7 11.43 4.42
 4 -16 -6 7.54 3.64
 -4 -16 6 2.52 1.06
 -4 -16 5 0.51 1.08
 4 -16 -5 0.58 1.16
 4 -16 -4 2 1.61
 -4 -16 4 1.22 1.44
 -4 -16 3 0.36 0.75
 4 -16 -3 -0.57 0.69
 -4 -16 2 5.35 2.59
 -4 16 2 3.82 3.16
 4 -16 -2 6.48 3.6
 -4 -16 1 9.3 3.7
 4 -16 -1 12.4 4.69
 -4 16 1 5.27 2.84
 -4 -16 0 11.18 3.85
 4 -16 0 20.35 6.26
 -4 -16 -1 5.71 2.66
 -4 16 -1 4.03 2.91
 -4 -16 -2 0.96 1.23
 -4 16 -2 3.49 3.65
 4 -16 2 1.93 2.38
 -4 -16 -3 5.49 3.21
 -4 16 -3 2.21 2.64
 -4 -16 -4 127.36 13.63
 -4 16 -4 91.89 14.66
 -4 16 -5 50.74 10.83
 -4 -16 -5 67.94 9.91
 -4 16 -6 0.11 1.45
 -4 -16 -6 1.64 1.9
 -4 -16 -7 3.03 2.17
 -4 16 -7 3.96 3.46
 4 -17 -8 3.43 2.16
 4 -17 -7 3.92 3.4
 4 17 -7 3.05 2.39
 -4 -17 7 -0.09 1.68
 4 -17 -6 47.47 9.53
 -4 -17 6 35.87 7.66
 -4 -17 5 2.03 1.69
 4 -17 -5 5.26 3.7
 4 -17 -4 2.16 0.7
 -4 -17 4 -0.36 0.97
 -4 -17 3 18.13 4.94
 4 -17 -3 25.7 7.17
 4 -17 -2 82.06 12.97
 -4 -17 2 71.6 10.47
 4 -17 -1 65.68 11.4
 -4 -17 1 53.16 9.01
 -4 -17 0 92.72 11.91
 4 -17 0 122.92 15.83
 -4 17 -1 2.26 1.31
 -4 -17 -1 2.76 1.97
 4 -17 1 -1.13 2.02
 -4 -17 -2 17.65 4.96
 -4 17 -2 19.46 6.71
 -4 -17 -3 2.49 2.26
 -4 17 -3 4.25 3.96
 -4 17 -4 1.51 1.95
 -4 17 -5 21.78 7.02
 -4 18 2 5.26 3.79
 -4 18 1 -1.01 1.83
 -4 18 0 -0.1 0.69
 5 0 -11 0.16 0.1
 -5 0 8 27.14 9.13
 -5 0 7 -2.98 4.53
 -5 0 6 149.05 13.62
 -5 0 5 2.36 1.68
 -5 0 4 20.7 4.2
 -5 0 3 1.35 1.3
 -5 0 2 4.19 1.84
 -5 0 1 1.09 1.52
 -5 0 0 511.74 25.15
 5 0 1 0.23 0.27
 -5 0 -1 0.5 1.69
 -5 0 -2 73.35 4.8
 -5 0 -2 79.68 5.18
 -5 0 -2 79.68 9.04
 5 0 2 80.33 6.49
 -5 0 -3 -0.43 0.72
 -5 0 -3 -0.27 0.24
 5 0 3 -0.81 0.96
 -5 0 -4 15.81 3.53
 -5 0 -4 18.26 4.43
 5 0 4 10.1 2.44
 -5 0 -5 0.35 0.92
 -5 0 -5 -0.09 1.22
 5 0 5 -0.34 1.3
 -5 0 -6 8.93 3
 -5 0 -6 8.9 2.95
 5 0 6 9.98 2.83
 -5 0 -7 0.3 1.21
 -5 0 -7 -1.5 1.35
 5 0 7 -0.91 1.33
 -5 0 -8 386.07 25.56
 5 0 8 339.19 21.89
 -5 0 -8 378.14 24.22
 -5 0 -9 -0.3 0.64
 -5 0 -10 0.63 1.62
 -5 0 -11 0.61 2.03
 -5 0 -12 8.63 3.42
 -5 0 -13 -0.73 1.54
 -5 0 -14 95.44 14.8
 -5 0 -15 -1.22 1.72
 -5 0 -16 19.54 7.22
 -5 0 -17 4.07 4.01
 -5 0 -18 7.31 3.88
 -5 1 9 10.01 7.18
 -5 1 8 119.7 19.06
 -5 -1 8 120.23 21.14
 -5 1 7 0.33 3.28
 -5 -1 7 5.59 3.63
 -5 1 6 0.39 0.94
 -5 -1 6 2.45 0.2
 -5 1 5 110.53 10.28
 -5 -1 5 108.11 10.38
 -5 1 4 125.77 10.84
 -5 -1 4 131.5 10.98
 -5 1 3 58.42 7.08
 -5 -1 3 56.15 6.78
 -5 1 2 3.61 1.55
 -5 -1 2 4.08 1.66
 -5 1 1 277.62 17.19
 -5 -1 1 284.47 17.13
 5 1 0 14.88 2.11
 -5 1 0 11.23 3.26
 -5 -1 0 15.51 3.77
 -5 -1 -1 186.24 7.13
 -5 1 -1 186.54 13.91
 -5 -1 -1 174.2 13.39
 -5 -1 -1 169.77 6.26
 5 1 1 196.2 10.2
 -5 1 -1 156.24 5.96
 -5 -1 -2 102.09 5.76
 -5 1 -2 106.67 10.52
 -5 -1 -2 103.17 10.37
 -5 1 -2 107.59 6.07
 5 -1 2 109.62 7.44
 5 1 2 116.43 8.51
 -5 1 -2 121.27 8.81
 -5 -1 -3 263.77 12.4
 -5 1 -3 266.01 18.04
 -5 -1 -3 268.44 17.81
 5 -1 3 271.91 14.38
 5 1 3 291.41 15.67
 -5 1 -3 276.33 15.27
 -5 1 -3 297.1 13.29
 -5 -1 -4 221.35 13.78
 -5 1 -4 230.67 16.87
 -5 -1 -4 234.75 16.64
 5 -1 4 213.45 13.31
 5 1 4 229.91 14.55
 -5 1 -4 229.6 12.64
 -5 1 -4 228.6 14.63
 -5 -1 -4 226.96 12.49
 -5 1 -5 75.88 9.49
 -5 -1 -5 69.54 8.89
 5 -1 5 70.72 7.67
 5 1 5 71.61 8.03
 -5 1 -5 73.7 8.64
 -5 -1 -5 75.17 8.66
 -5 1 -6 6.61 2.33
 -5 -1 -6 8.24 3.1
 -5 1 -6 3.26 1.89
 -5 -1 -6 7.43 2.47
 5 -1 6 3.03 1.21
 5 1 6 5.04 2.04
 -5 1 -7 61.84 9.35
 -5 -1 -7 72.23 9.86
 5 -1 7 62.86 8.11
 5 1 7 64.87 8.48
 -5 1 -7 72.48 9.34
 -5 -1 -7 64.57 8.86
 -5 1 -8 4.22 2.18
 -5 -1 -8 7.65 3.06
 -5 -1 -8 7.56 3.46
 5 -1 8 6.98 2.75
 5 1 8 1.47 0.66
 -5 1 -9 0.02 0.82
 -5 -1 -9 1.47 1.49
 -5 1 -10 0.56 0.94
 -5 -1 -10 0.15 1.24
 -5 1 -11 1.45 1.74
 -5 -1 -11 3.37 2.22
 -5 1 -12 4.95 2.82
 -5 -1 -12 4.45 3.04
 -5 1 -13 3.62 3.19
 -5 -1 -13 -0.25 1.3
 -5 1 -14 -1.79 3.21
 -5 -1 -14 -0.01 0.71
 -5 1 -15 12.39 5.53
 -5 -1 -15 9.78 4.72
 -5 1 -16 4.23 2.97
 -5 -1 -16 1.19 2.52
 -5 1 -17 57.74 12.55
 -5 -1 -17 84.19 15.12
 -5 1 -18 71.57 14.4
 -5 -1 -18 62.59 13.17
 5 -2 -11 1.17 0.62
 -5 2 9 10.25 7.38
 -5 -2 9 2.57 5.8
 -5 2 8 44.41 12.06
 -5 -2 8 37.8 11.32
 -5 2 7 394.84 27.31
 -5 -2 7 356.92 29.32
 -5 2 6 67.5 9.16
 -5 -2 6 63.36 9.12
 -5 2 5 350.78 20.27
 -5 -2 5 379.44 21.31
 -5 2 4 120.7 10.63
 -5 -2 4 106.45 9.99
 -5 2 3 2.74 1.49
 -5 -2 3 0.33 1.2
 -5 2 2 0.02 0.89
 -5 -2 2 1.12 0.72
 -5 2 1 1.01 0.86
 -5 -2 1 0.48 0.52
 5 2 -1 0.4 0.47
 -5 2 0 25.94 2.48
 -5 2 0 28.27 5.02
 -5 -2 0 25.68 4.62
 5 2 0 27.81 3.45
 -5 2 -1 12.23 2.21
 -5 2 -1 12.76 3.38
 -5 -2 -1 8.61 2.37
 -5 -2 -1 12.91 1.52
 -5 2 -1 10.35 1.26
 5 2 1 12.9 2.6
 -5 2 -2 263.3 11.06
 -5 2 -2 261.29 17.49
 -5 -2 -2 262.22 17.1
 -5 -2 -2 260.75 10.87
 5 2 2 316.21 15.94
 -5 2 -2 270.46 14.17
 -5 2 -3 -0.26 0.98
 -5 2 -3 0.14 0.11
 -5 2 -3 0.22 0.64
 -5 -2 -3 0.82 1.29
 5 -2 3 0.32 0.25
 -5 -2 -3 1.55 1.1
 5 2 3 1.66 1.46
 -5 -2 -4 314.42 15.23
 -5 2 -4 321.35 20.68
 -5 -2 -4 325.29 20.19
 5 -2 4 312.36 16.7
 5 2 4 393.93 20.45
 -5 2 -4 324.18 18.51
 -5 2 -4 340.27 16.14
 -5 -2 -5 119.87 9.29
 -5 2 -5 117.13 12.19
 -5 -2 -5 124.1 11.94
 -5 2 -5 127.69 9.68
 5 -2 5 112.31 9.87
 5 2 5 134.86 11.77
 -5 2 -5 118.47 11.21
 -5 -2 -6 267.37 17.43
 -5 2 -6 269.98 19.68
 -5 -2 -6 260.98 18.85
 5 -2 6 266.55 16.82
 5 2 6 255.78 17.78
 -5 2 -6 241.46 15.33
 -5 2 -6 276.02 18.91
 -5 -2 -6 254.46 15.68
 -5 2 -7 0.31 1.38
 -5 -2 -7 -0.94 0.9
 -5 2 -7 -0.76 1.84
 -5 2 -7 -1.63 1.37
 -5 -2 -7 -0.91 0.89
 5 -2 7 0.14 0.63
 5 2 7 0.38 0.34
 -5 -2 -8 72.92 10.19
 5 -2 8 65.03 8.68
 -5 2 -8 80.02 10.76
 -5 -2 -8 95.22 12.18
 -5 2 -9 129.71 14.72
 -5 -2 -9 168.49 17.86
 -5 2 -10 45.68 8.85
 -5 -2 -10 58.54 10.05
 -5 2 -11 36.54 8.42
 -5 -2 -11 46.17 9.21
 -5 2 -12 10.96 5.15
 -5 -2 -12 7.71 4.04
 -5 2 -13 43.48 9.81
 -5 -2 -13 46.8 9.6
 -5 2 -14 15.01 6.19
 -5 -2 -14 21.12 6.88
 -5 2 -15 4.05 3.11
 -5 -2 -15 5.36 3.24
 -5 2 -16 3.49 3.56
 -5 -2 -16 3.4 3.41
 -5 2 -17 -1.16 2.31
 -5 -2 -17 -0.59 2.67
 -5 2 -18 1.42 2.68
 -5 -2 -18 -0.96 2.39
 5 -3 -11 65.98 4.89
 5 3 -10 19.35 2.57
 5 -3 -10 21.89 2.26
 5 3 -9 77.26 4.25
 -5 3 9 20.54 10.16
 -5 3 8 21.46 8.74
 -5 -3 8 10.42 6.81
 -5 3 7 12.66 3.79
 -5 -3 7 21.37 7.96
 -5 3 6 226.55 17.48
 -5 -3 6 204.99 17.83
 -5 3 5 159.47 12.8
 -5 -3 5 149.91 13.07
 -5 3 4 231.47 15.45
 -5 -3 4 211.26 14.61
 5 3 -3 0.59 0.33
 -5 3 3 -0.02 0.73
 -5 -3 3 2.39 1.43
 5 3 -3 1.77 0.72
 -5 3 2 18.83 3.98
 -5 -3 2 19.49 3.9
 5 3 -2 28.14 3.31
 -5 3 1 16.35 3.69
 -5 -3 1 13.64 3.27
 5 3 -1 20.67 3.21
 -5 3 0 4.21 1.16
 -5 -3 0 3.78 0.8
 -5 3 0 4.94 1.81
 -5 -3 0 4.5 1.98
 -5 3 0 3.33 0.71
 5 3 0 3.79 1.31
 -5 3 -1 20.08 4.35
 -5 -3 -1 16.52 3.69
 -5 3 -1 21.39 2.15
 -5 -3 -1 18.06 2.17
 5 3 1 21.06 3.73
 -5 3 -1 19.28 3.03
 -5 3 -2 11.2 3.2
 -5 -3 -2 8.23 2.65
 -5 3 -2 8.22 1.63
 5 3 2 5.55 1.91
 -5 -3 -2 8.59 1.59
 -5 3 -2 9.32 2.62
 -5 -3 -3 135.29 8.14
 -5 3 -3 142.31 12.63
 -5 3 -3 135.6 8.36
 -5 -3 -3 129.47 11.71
 5 3 3 151.46 12.17
 -5 3 -3 140.4 11.23
 -5 -3 -4 91.57 7.27
 -5 3 -4 99.68 10.81
 -5 -3 -4 93.99 10.02
 -5 3 -4 93.07 7.57
 5 3 4 96.66 10.17
 -5 3 -4 108.51 10.46
 -5 -3 -5 258.71 14.36
 -5 3 -5 297.76 20.16
 -5 -3 -5 261.05 18.07
 5 -3 5 248.87 15.47
 5 3 5 265.38 18.35
 -5 3 -5 281.49 18.96
 -5 3 -5 254.11 14.93
 -5 -3 -6 175.5 12.41
 -5 3 -6 187.04 13.18
 -5 3 -6 202.95 16.92
 -5 -3 -6 188.46 15.48
 5 -3 6 172.29 13.19
 5 3 6 174.41 15.04
 -5 3 -6 203.64 16.6
 -5 -3 -7 51.92 6.84
 -5 3 -7 61.63 9.52
 -5 -3 -7 59.15 8.56
 -5 3 -7 47.35 6.67
 5 -3 7 49.65 7.08
 5 3 7 50.05 7.95
 -5 3 -7 73.18 10.2
 -5 -3 -8 112.48 11.91
 -5 3 -8 128.06 14.32
 -5 -3 -8 130.5 13.73
 5 -3 8 104.05 11.33
 -5 3 -8 118.19 11.48
 -5 3 -8 126.63 14.18
 -5 -3 -8 117.93 11.4
 -5 -3 -9 88.55 11.23
 -5 3 -9 101.33 13.28
 -5 3 -9 92.66 10.55
 -5 -3 -9 96.75 10.9
 -5 -3 -10 16.4 5.26
 -5 3 -10 19.35 5.99
 -5 -3 -11 2.53 0.61
 -5 3 -11 5.55 3.35
 -5 -3 -12 2.16 1.58
 -5 3 -12 0.54 1.78
 -5 3 -13 76.63 13.21
 -5 -3 -13 79.55 14.42
 -5 -3 -14 3.88 2.97
 -5 3 -14 0.57 0.51
 -5 -3 -15 37.25 10.51
 -5 3 -15 28 8.9
 -5 -3 -16 -0.54 2.03
 -5 3 -16 0.87 2.15
 -5 3 -17 124.86 19.56
 -5 -3 -17 175.23 24.77
 -5 3 -18 26.11 9.1
 -5 -3 -18 20.81 8.5
 5 -4 -11 56.47 4.98
 5 4 -11 51.29 5.78
 5 4 -10 47.6 5.12
 5 -4 -10 47.96 4.19
 5 -4 -9 3.85 1.01
 5 4 -9 2.41 1.05
 5 4 -8 23.58 2.85
 5 -4 -8 28.3 2.32
 5 4 -8 26.33 3.14
 -5 4 8 17.31 7.79
 5 4 -7 26.27 2.97
 -5 4 7 13.1 4.61
 -5 -4 7 11.63 6.24
 5 4 -7 35.11 3.97
 5 4 -6 219.79 9.88
 -5 4 6 187.86 16.15
 -5 -4 6 138.05 15.93
 5 4 -6 273.24 11.79
 -5 4 5 179.73 14.13
 -5 -4 5 162.32 14.44
 5 4 -5 212.58 10.56
 5 4 -4 6.79 1.37
 -5 4 4 8.27 2.86
 -5 -4 4 8.5 2.9
 5 4 -4 8.48 1.99
 -5 4 3 73.05 8.23
 -5 -4 3 72.59 7.93
 5 4 -3 86.23 7.11
 -5 4 2 35.17 5.51
 -5 -4 2 36.02 5.52
 -5 4 1 12.58 1.63
 -5 4 1 15.11 3.63
 -5 -4 1 12.02 3.15
 -5 -4 1 14.56 1.9
 -5 4 1 14.16 2.1
 5 4 -1 18.77 3.72
 -5 -4 0 43.49 3.59
 -5 4 0 50.26 3.63
 -5 4 0 43.04 6.43
 -5 -4 0 42.04 6.02
 5 4 0 57.58 6.96
 -5 4 0 57.33 5.37
 -5 4 -1 33.33 5.81
 -5 -4 -1 29.47 5.08
 -5 4 -1 40.11 3.48
 -5 -4 -1 38.76 3.57
 5 4 1 39.81 5.96
 -5 4 -1 47.85 5.52
 -5 4 -2 37.73 6.19
 -5 -4 -2 30.7 5.39
 -5 -4 -2 38.8 3.78
 5 4 2 41.3 6.39
 -5 4 -2 44.37 5.94
 -5 4 -2 40.12 3.94
 -5 4 -3 82.5 6.54
 -5 4 -3 99.09 10.48
 -5 -4 -3 89.37 9.39
 -5 -4 -3 85.9 6.43
 5 4 3 94.73 10.1
 -5 4 -3 108.86 10.35
 -5 4 -4 3.12 2.31
 -5 -4 -4 1.46 1.3
 -5 4 -4 2.96 1.1
 -5 -4 -4 1.15 0.75
 5 4 4 4.04 2.46
 -5 4 -4 1.14 1.03
 -5 -4 -5 328.2 17.05
 -5 4 -5 358.2 22.55
 -5 -4 -5 352.93 21.01
 -5 4 -5 316.26 17.36
 5 4 5 332.52 21.89
 -5 4 -5 407.63 24.08
 -5 -4 -6 411.57 20.94
 -5 4 -6 465.09 27.24
 -5 -4 -6 415.54 24.47
 5 4 6 441.73 26.45
 -5 4 -6 422.71 21.83
 -5 4 -6 489.99 28.29
 -5 4 -7 34.64 7
 -5 -4 -7 23.77 5.34
 -5 -4 -7 25.81 4.67
 5 -4 7 20.74 4.5
 -5 4 -7 27.1 5.08
 -5 4 -7 26.25 6.19
 -5 -4 -8 43.99 6.68
 -5 4 -8 46.44 7.06
 -5 4 -8 53.89 9.26
 -5 -4 -8 39.67 7.34
 -5 4 -8 50.89 9.21
 -5 -4 -9 4.69 1.73
 -5 -4 -9 4.47 2.29
 -5 4 -9 2.82 1.09
 -5 -4 -10 32.81 6.4
 -5 4 -10 30.74 7.73
 -5 -4 -11 26.09 6.54
 -5 -4 -11 20.22 5.16
 -5 4 -11 23.48 6.92
 -5 -4 -12 18.72 5.94
 -5 -4 -12 17.13 5.33
 -5 4 -12 18.88 6.25
 -5 -4 -13 2.72 2.76
 -5 4 -13 12.69 5.87
 -5 -4 -14 37.51 8.9
 -5 4 -14 39.4 10.22
 -5 -4 -15 0.62 1.41
 -5 4 -15 -1.49 2.58
 -5 -4 -16 32.79 9.11
 -5 4 -16 28.65 8.88
 -5 -4 -17 -1.66 2.56
 -5 4 -17 0.82 1.61
 -5 4 -18 2.07 3.71
 5 5 -11 40.37 5.43
 5 -5 -11 54.95 5.37
 5 5 -10 161.88 10.87
 5 -5 -10 183.25 10.06
 5 -5 -9 109.82 7.11
 5 5 -9 92.8 7.54
 5 5 -8 188.39 10.44
 5 -5 -8 230.74 10.14
 -5 5 8 67.92 16.9
 5 5 -7 269.54 12.41
 5 -5 -7 295.22 11.77
 5 5 -7 246.55 12.23
 -5 5 7 141.99 18.04
 -5 -5 7 103.44 19.45
 5 5 -6 36.82 3.96
 -5 5 6 35.35 7.01
 5 5 -6 48.99 5.71
 5 5 -5 7.67 2.15
 5 5 -5 3.44 1.1
 -5 5 5 3.75 2.06
 -5 -5 5 4.58 2.02
 -5 5 4 64.67 7.87
 -5 -5 4 66.25 8.15
 5 5 -4 81.14 7.45
 -5 5 3 35.67 5.57
 -5 -5 3 33.74 5.3
 -5 5 3 38.35 2.86
 5 5 -3 46.41 5.72
 -5 5 3 32.43 2.44
 -5 -5 2 47.19 4.11
 -5 5 2 43.9 6.29
 -5 -5 2 41.88 5.79
 -5 5 2 54.7 4.46
 5 5 -2 55.7 6.59
 -5 5 2 43.35 3.8
 -5 5 1 0.68 0.29
 -5 5 1 0.23 0.69
 -5 -5 1 -0.77 0.63
 -5 5 1 0.38 0.79
 -5 -5 1 1.19 0.66
 5 5 -1 0.46 0.86
 -5 5 0 2.37 1.53
 -5 -5 0 1.84 0.98
 -5 5 0 1.82 0.64
 -5 5 0 2.39 1.03
 5 5 0 3.83 1.53
 -5 -5 0 2.21 0.79
 -5 5 -1 -0.11 0.35
 -5 5 -1 -0.01 0.85
 -5 -5 -1 0.28 0.5
 -5 -5 -1 0.66 0.75
 -5 5 -1 0.94 0.11
 5 5 1 0.45 1.18
 -5 -5 -2 4.01 1.38
 -5 5 -2 3.64 1.28
 -5 5 -2 5.17 2.3
 -5 -5 -2 4.28 1.89
 -5 5 -2 5.75 2.24
 5 5 2 6.56 3.01
 -5 5 -3 53.81 7.75
 -5 -5 -3 45.87 6.57
 -5 -5 -3 47.51 4.84
 -5 5 -3 52.48 7.13
 5 5 3 47.53 7.64
 -5 5 -3 43.99 4.85
 -5 5 -4 29.03 4.28
 -5 5 -4 33.3 6.19
 -5 -5 -4 27.19 5.27
 -5 -5 -4 29.32 4.01
 -5 5 -4 35.55 6.21
 5 5 4 32.76 6.45
 -5 5 -5 15.32 4.44
 -5 -5 -5 12.34 3.65
 -5 5 -5 11.07 2.86
 -5 -5 -5 11.51 2.67
 -5 5 -5 15.7 4.24
 5 5 5 16.01 4.55
 -5 -5 -6 43.3 5.75
 -5 5 -6 38.6 7.1
 -5 -5 -6 43.11 6.96
 -5 5 -6 39.16 5.75
 -5 5 -6 51.91 8.48
 5 5 6 33.95 6.98
 -5 5 -7 15.27 5
 -5 -5 -7 12.84 3.86
 -5 -5 -7 10.78 3.03
 -5 5 -7 11.35 3.97
 -5 -5 -8 238.68 16.61
 -5 5 -8 262.98 21.35
 -5 -5 -8 241.15 18.71
 -5 5 -8 264.67 21.93
 -5 5 -8 247.14 17.6
 -5 -5 -9 8.21 3.54
 -5 -5 -9 5.49 2.21
 -5 5 -9 6.35 3.4
 -5 -5 -10 15.78 4.31
 -5 5 -10 20.1 6.44
 -5 -5 -11 30.18 6.44
 -5 5 -11 34.77 8.63
 -5 -5 -12 3.83 2.64
 -5 5 -12 5.28 3.58
 -5 -5 -13 2.51 1.52
 -5 5 -13 2.27 2.98
 -5 -5 -14 26.71 7.03
 -5 5 -14 27.76 8.21
 -5 -5 -15 21.42 6.55
 -5 5 -15 35.7 10.29
 -5 -5 -16 4.28 2.33
 -5 -5 -16 6.47 4.06
 -5 5 -16 4.78 4.44
 -5 -5 -17 3.23 0.46
 -5 5 -17 3.13 1.3
 -5 -5 -18 8.95 4.02
 5 6 -10 4.9 2.04
 5 -6 -10 7.56 1.89
 5 -6 -9 1.86 0.8
 5 6 -9 1.79 1.52
 -5 6 9 1.73 3.7
 5 6 -8 5.68 1.89
 -5 6 8 5.5 6.3
 5 -6 -8 8.29 2.06
 5 -6 -7 6.61 1.75
 5 6 -7 2.43 1.15
 -5 6 7 3.14 0.81
 -5 6 7 3.85 3.86
 -5 6 7 2.47 0.68
 -5 -6 7 1.87 4.12
 5 6 -6 59.89 5.91
 5 -6 -6 67.44 5.68
 5 6 -6 47.04 5.1
 -5 6 6 54.16 3.77
 -5 6 6 45.2 3.39
 -5 6 6 36.79 7.57
 -5 -6 6 22.35 8.4
 5 6 -5 17.96 2.94
 -5 6 5 24.88 4.98
 -5 -6 5 11.85 3.92
 -5 6 5 18.9 2.17
 5 6 -5 29.49 5.14
 -5 6 4 4.06 1.09
 5 6 -4 8.17 2.73
 -5 6 4 5.48 2.24
 -5 6 4 4.97 1.31
 -5 -6 4 1.59 0.93
 5 6 -3 19.41 4.02
 -5 -6 3 17.86 2.75
 -5 6 3 23.35 3.18
 -5 6 3 19.43 4.08
 -5 -6 3 14.86 3.59
 -5 6 2 19.19 2.8
 5 6 -2 19.52 4.37
 -5 -6 2 24.85 4.46
 -5 6 2 31.35 4.03
 -5 6 2 22.57 4.57
 -5 -6 2 22.11 3.1
 -5 6 1 36.09 3.91
 -5 -6 1 38.26 4.09
 -5 6 1 32.08 5.5
 -5 -6 1 31.25 4.99
 -5 6 1 45.79 5.36
 5 6 -1 43.95 6.49
 5 6 0 19.44 4.45
 -5 6 0 18.43 2.79
 -5 6 0 14.74 3.74
 -5 -6 0 12.63 3.04
 -5 6 0 21.94 3.98
 -5 -6 0 14.29 2.49
 -5 6 -1 51.04 7.33
 -5 -6 -1 43.61 6.08
 -5 6 -1 50.03 4.9
 -5 6 -1 66.12 7.45
 5 6 1 56.94 8.09
 -5 -6 -1 45.61 4.66
 -5 6 -2 1.64 0.79
 -5 -6 -2 1.2 0.95
 -5 6 -2 2.08 1.67
 -5 -6 -2 1.57 1.39
 -5 6 -2 0.94 0.96
 5 6 2 2.01 1.58
 -5 -6 -3 2.1 0.99
 -5 6 -3 1.38 1.37
 -5 -6 -3 0.98 0.89
 -5 6 -3 1.3 0.77
 -5 6 -3 3.8 2.01
 5 6 3 1.12 0.91
 -5 6 -4 -0.08 1.01
 -5 -6 -4 0.83 1.22
 -5 6 -4 -0.67 0.83
 -5 6 -4 1.31 0.61
 -5 -6 -4 0.19 0.57
 5 6 4 -0.63 1.69
 -5 6 -5 188.54 12.94
 -5 6 -5 233.07 17.7
 -5 -6 -5 191.58 14.75
 -5 -6 -5 194.23 12.59
 -5 6 -5 234.28 18.39
 5 6 5 200.33 18.09
 -5 -6 -6 1.15 1.08
 -5 6 -6 0.84 0.68
 -5 -6 -6 0.79 0.63
 -5 6 -6 1.76 0.61
 -5 6 -7 25.14 6.09
 -5 -6 -7 20.52 4.97
 -5 -6 -7 19.48 4.05
 -5 6 -7 18.06 4.13
 -5 6 -7 21.33 5.78
 -5 6 -8 0.27 2.51
 -5 -6 -8 1 1.61
 -5 -6 -8 1.11 1.15
 -5 6 -8 0.15 1.45
 -5 -6 -9 46.99 7.22
 -5 -6 -9 37.45 7.21
 -5 6 -9 55.87 10.08
 -5 -6 -10 -1.13 1.69
 -5 -6 -10 1.49 1.36
 -5 6 -10 0.69 2.72
 -5 -6 -11 5.17 2.47
 -5 6 -11 7.62 4.48
 -5 -6 -12 51.01 8.71
 -5 6 -12 44.5 10.24
 -5 -6 -13 8.01 3.28
 -5 6 -13 4.69 3.52
 -5 -6 -14 12.68 4.64
 -5 6 -14 17.38 6.66
 -5 -6 -15 33.39 7.91
 -5 6 -15 41.04 11.31
 -5 -6 -16 7.72 4.4
 -5 6 -16 6.59 3.98
 -5 -6 -17 33.38 8.59
 -5 6 -17 26.43 9.49
 5 7 -11 -0.27 0.91
 5 -7 -9 0.94 0.4
 -5 7 8 0.38 0.33
 5 -7 -8 3.26 1.56
 -5 7 8 0.61 1.65
 -5 7 7 17.12 2.9
 5 -7 -7 24.44 3.82
 -5 7 7 10.54 5.82
 -5 -7 7 1.72 2.21
 -5 7 6 6.1 1.77
 -5 7 6 -1.83 3.12
 -5 -7 6 7.56 5.25
 5 -7 -6 7.97 2.08
 5 7 -5 38.3 5.93
 -5 7 5 38.23 4.55
 5 -7 -5 42.92 5.24
 -5 7 5 23.92 5.13
 -5 -7 5 20.02 6.55
 -5 7 5 28.41 3.55
 -5 7 4 135.62 8.64
 -5 7 4 139.3 12.2
 -5 7 4 195.36 11.21
 -5 -7 4 100.11 11.63
 -5 -7 4 145.93 9.62
 5 7 -4 181.53 14.46
 -5 -7 3 10.26 2.35
 5 7 -3 10.81 3.6
 -5 7 3 8.71 2.07
 -5 7 3 12.87 2.81
 -5 7 3 12.48 3.41
 -5 -7 3 12.17 3.32
 5 7 -2 1.77 0.99
 -5 -7 2 0.72 0.42
 -5 7 2 0.91 0.28
 -5 7 2 1.04 1.4
 -5 7 2 0.62 0.96
 -5 -7 2 0.89 0.94
 -5 7 1 46.51 4.96
 -5 -7 1 47.32 5
 -5 7 1 51.94 7.07
 -5 -7 1 45.01 6.09
 -5 7 1 67.33 7.29
 5 7 -1 64.93 8.68
 -5 -7 0 -2.16 1.01
 5 7 0 -0.44 1.34
 -5 7 0 1.08 1.5
 -5 -7 0 0.7 0.86
 -5 7 0 2.68 1.23
 -5 7 0 0.15 0.35
 5 7 1 7.07 2.73
 -5 7 -1 9.33 3.18
 -5 -7 -1 4.84 1.91
 -5 -7 -1 7.21 1.91
 -5 7 -1 9.79 3.17
 -5 7 -1 6.28 1.85
 -5 7 -2 48.97 7.29
 -5 -7 -2 50.27 6.63
 -5 7 -2 46.21 5.22
 -5 7 -2 67.74 8.58
 -5 -7 -2 46.85 5.19
 5 7 2 46.52 7.85
 -5 -7 -3 7.48 2.22
 -5 7 -3 6.8 1.92
 -5 7 -3 9.82 3.37
 -5 -7 -3 9.21 2.85
 -5 7 -3 9.58 3.36
 5 7 3 5.54 2.73
 -5 -7 -4 1.57 0.68
 -5 7 -4 0.69 1.06
 -5 -7 -4 -0.97 1.47
 -5 7 -4 0.34 0.18
 -5 7 -4 0.53 0.99
 -5 7 -5 123.06 12.72
 -5 -7 -5 119.41 11.21
 -5 -7 -5 107.59 9.3
 -5 7 -5 107.78 9.75
 -5 7 -6 90.3 11.05
 -5 -7 -6 87.86 9.7
 -5 -7 -6 72.24 7.86
 -5 7 -6 102.66 12.74
 -5 7 -7 16.73 4.74
 -5 -7 -7 16.44 4.34
 -5 -7 -7 17.12 3.86
 -5 7 -7 28.58 6.92
 -5 7 -8 1.44 2.2
 -5 -7 -8 0.3 1.41
 -5 -7 -8 0.12 0.22
 -5 7 -8 2.67 2.01
 -5 7 -9 24.24 6.54
 -5 -7 -9 22.49 5.46
 -5 -7 -9 20.54 4.82
 -5 7 -9 23.12 6.85
 -5 -7 -10 30.26 6.49
 -5 -7 -10 27.89 6.04
 -5 7 -10 37.53 8.72
 -5 -7 -11 4.34 2.66
 -5 -7 -11 3.37 2.05
 -5 7 -11 3.3 2.63
 -5 -7 -12 28.17 6.49
 -5 7 -12 22.49 7.17
 -5 -7 -13 -1.11 1.16
 -5 7 -13 -0.54 0.3
 -5 -7 -14 27.88 7.05
 -5 7 -14 25.95 8.59
 -5 -7 -15 0.43 1.82
 -5 7 -15 0.07 1.7
 -5 -7 -16 9.23 4.21
 -5 7 -16 15.16 6.86
 -5 -7 -17 2.97 2.59
 5 8 -11 2.49 1.77
 5 8 -10 0.2 0.97
 5 8 -9 10.13 2.72
 5 8 -8 21.04 3.96
 -5 8 7 1.32 1
 5 8 -7 5.8 2.08
 -5 8 7 8.36 5.66
 5 8 -6 1.51 1.35
 -5 8 6 0.61 0.22
 -5 8 5 31.34 6.27
 -5 -8 5 19.05 7.24
 -5 8 4 2.29 1.07
 -5 -8 4 2.05 1.41
 -5 8 4 1.5 1.19
 -5 -8 4 -1.98 3.39
 -5 8 3 24.09 3.9
 5 8 -3 35.42 7.13
 -5 8 3 35.73 5.4
 -5 8 3 25.37 4.81
 -5 -8 3 14.54 3.87
 -5 -8 3 31.77 4.55
 5 8 -2 7.14 3.25
 -5 -8 2 8.78 2.25
 -5 8 2 5.19 1.63
 -5 8 2 12.74 3.41
 -5 8 2 7.06 2.49
 -5 -8 2 6.55 2.25
 5 8 -1 16.73 4.6
 -5 8 1 12.09 2.73
 -5 8 1 17.62 4.2
 -5 -8 1 16.86 3.19
 -5 8 1 22.9 4.57
 -5 -8 1 16.69 3.78
 -5 -8 0 147.06 10.08
 -5 8 0 141.12 10.08
 -5 8 0 165.43 13.42
 -5 -8 0 133.8 11.08
 5 8 0 164.21 15.24
 5 8 1 7.53 3.34
 -5 8 -1 7.84 3.14
 -5 -8 -1 3.51 1.85
 -5 8 -1 11.23 3.55
 -5 -8 -1 6.36 2.01
 -5 8 -1 5.22 1.69
 -5 8 -2 12 2.76
 -5 8 -2 11.4 3.43
 -5 -8 -2 10.43 2.55
 -5 -8 -2 8.68 2.61
 -5 8 -2 13.16 3.95
 -5 8 -3 4.88 1.77
 -5 -8 -3 3.84 1.43
 -5 8 -3 3.95 1.89
 -5 -8 -3 5.74 2.26
 -5 8 -3 7.31 2.75
 -5 8 -4 83.13 10.17
 -5 -8 -4 74.89 8.58
 -5 -8 -4 76.17 7.56
 -5 8 -4 103.56 12.08
 -5 8 -4 71.84 7.8
 -5 8 -5 -0.04 0.82
 -5 -8 -5 0.23 0.7
 -5 8 -5 1.42 1.97
 -5 -8 -5 0.21 0.94
 -5 8 -6 0.06 1.55
 -5 -8 -6 -0.46 1.23
 -5 8 -6 -2.35 2.62
 -5 -8 -6 1.2 1.42
 -5 8 -7 2.41 2.01
 -5 -8 -7 0.3 1.26
 -5 8 -7 0.13 1.22
 -5 -8 -7 -1.23 1.41
 -5 8 -8 68.17 10.57
 -5 -8 -8 58.67 8.33
 -5 -8 -8 53.55 7.6
 -5 8 -8 71.44 11.69
 -5 8 -9 4.2 2.8
 -5 -8 -9 5.74 3.11
 -5 -8 -9 6.37 2.88
 -5 8 -9 6.73 3.47
 -5 8 -10 0.44 0.46
 -5 -8 -10 0.35 0.9
 -5 -8 -10 2.88 1.87
 -5 8 -10 3.5 1.98
 -5 -8 -11 38.2 7.53
 -5 -8 -11 39.23 7.28
 -5 8 -11 45.7 10.25
 -5 -8 -12 31.38 7.1
 -5 -8 -12 33.83 7.05
 -5 8 -12 32.59 8.67
 -5 -8 -13 33.68 7.44
 -5 8 -13 34.04 9.66
 -5 -8 -14 3.25 2.49
 -5 8 -14 8.2 3.93
 -5 -8 -15 1.23 1.49
 -5 8 -15 3.83 3.65
 -5 -8 -16 2.23 0.7
 -5 8 -16 6.45 4.63
 -5 -9 17 27.52 13.86
 5 9 -11 9.65 3.2
 5 9 -10 -1.06 1.08
 5 -9 -9 0.26 1.11
 5 9 -9 1.67 1.32
 5 -9 -8 42.13 6.26
 5 9 -8 35.71 5.5
 5 9 -7 41.56 5.76
 5 -9 -7 59.73 7.44
 -5 9 6 1.14 1
 5 -9 -6 5.23 2.12
 -5 9 6 7.83 4.83
 -5 9 5 129.13 11.41
 -5 9 5 124.34 14.55
 -5 -9 5 153.33 11.11
 -5 -9 4 90 8.37
 -5 9 4 91.4 9.46
 5 -9 -4 128.99 11.05
 -5 9 4 74.65 9.42
 -5 -9 4 45.71 10.36
 -5 9 3 225.76 16.2
 -5 9 3 242.38 16.59
 -5 -9 3 212.23 13.67
 -5 -9 2 19.35 3.7
 -5 9 2 22.22 5.01
 -5 9 2 18.44 4.38
 -5 -9 2 17.65 4.15
 -5 9 1 16.3 3.93
 -5 9 1 25.94 5.27
 -5 -9 1 16.41 3.23
 -5 -9 1 14.09 3.34
 -5 -9 0 10.74 2.76
 -5 9 0 10.68 2.91
 -5 9 0 15.27 4.13
 -5 -9 0 9.53 2.7
 -5 9 -1 51.03 7.43
 -5 -9 -1 37.21 5.53
 -5 9 -1 62.87 8.81
 -5 -9 -1 47.38 5.8
 -5 9 -2 39.72 6.9
 -5 -9 -2 31.69 5.11
 -5 -9 -2 37.84 5.21
 -5 -9 -3 17.88 3.67
 -5 9 -3 20.24 5.04
 -5 -9 -3 20.9 4.15
 -5 -9 -4 3.01 1.75
 -5 9 -4 4.19 2.42
 -5 -9 -4 4.52 2.08
 -5 9 -4 3.61 2.58
 -5 -9 -5 30.02 5.39
 -5 9 -5 24.97 5.53
 -5 -9 -5 26.91 4.76
 -5 9 -5 33 7.29
 -5 9 -6 3.72 2.17
 -5 -9 -6 3.22 1.73
 -5 9 -6 2.04 2.45
 -5 -9 -6 2.99 1.72
 -5 9 -7 1.67 2.34
 -5 -9 -7 0.29 0.91
 -5 9 -7 -0.19 2.09
 -5 -9 -7 -0.44 0.83
 -5 9 -8 8.42 3.86
 -5 -9 -8 6.87 2.95
 -5 9 -8 8.77 4.46
 -5 -9 -8 9.16 3.25
 -5 9 -9 27.98 6.82
 -5 -9 -9 22.49 5.28
 -5 -9 -9 24.6 5.16
 -5 9 -9 27.61 7.51
 -5 9 -10 1.41 1.2
 -5 -9 -10 2.79 1.93
 -5 -9 -10 -0.59 1.16
 -5 9 -10 1.03 3.33
 -5 -9 -11 0.51 1.11
 -5 -9 -11 1.82 1.62
 -5 9 -11 3.48 3.31
 -5 -9 -12 6.08 3.27
 -5 -9 -12 2.51 1.78
 -5 9 -12 0.89 1.86
 -5 -9 -13 38.65 8.08
 -5 -9 -13 42.15 8.31
 -5 9 -13 44.34 11.15
 -5 -9 -14 8.4 4.01
 -5 -9 -14 6.48 3.32
 -5 9 -14 10.6 5.77
 -5 -9 -15 5.9 2.95
 -5 9 -15 11.06 6
 -5 -10 17 11.1 8.28
 5 10 -10 28.58 5.4
 5 10 -9 38.41 6.06
 5 -10 -8 82.91 9.35
 5 10 -8 60.23 7.63
 5 -10 -7 1.94 1.08
 5 10 -7 1.48 1.33
 -5 10 6 27.79 5.34
 -5 10 6 34.85 10.71
 -5 -10 5 7.56 2.35
 -5 10 5 1.52 0.76
 -5 10 5 -3.15 4.65
 5 -10 -5 10.07 3.17
 -5 -10 4 231.53 14.92
 5 -10 -4 319.39 19.18
 -5 10 4 174.78 15.02
 -5 10 4 225.72 18.28
 -5 -10 4 95.25 19.43
 5 -10 -3 0.63 0.33
 -5 10 3 0.5 1.66
 -5 -10 3 0.93 1.14
 -5 10 3 2.06 1.28
 -5 10 2 35.76 6.01
 -5 10 2 33.36 6.36
 -5 -10 2 33.5 5.2
 -5 -10 2 25.58 5.49
 -5 10 1 19.52 5.09
 -5 10 1 14.69 3.85
 -5 -10 1 11.35 2.92
 -5 -10 1 9.82 3.01
 -5 -10 0 12.48 2.86
 -5 10 0 14.17 3.5
 -5 10 0 15.73 4.68
 -5 -10 0 12.93 3.22
 -5 -10 -1 87.37 8.58
 -5 10 -1 100.55 10.52
 -5 -10 -1 84.64 8.57
 -5 10 -2 9.82 3.43
 -5 -10 -2 5.63 2.16
 -5 10 -2 6.8 2.98
 -5 -10 -2 8.67 2.47
 -5 10 -3 110.79 11.49
 -5 -10 -3 79.47 8.32
 -5 10 -3 99.1 12.55
 -5 -10 -3 87.31 8.79
 -5 -10 -4 2.9 1.7
 -5 10 -4 0.62 0.64
 -5 -10 -4 1.18 1.03
 -5 10 -4 3.75 2.73
 -5 10 -5 30.21 6.25
 -5 -10 -5 25.39 4.85
 -5 -10 -5 30.09 5.19
 -5 10 -5 38.82 8.21
 -5 -10 -6 0.28 0.86
 -5 10 -6 0.57 0.55
 -5 -10 -6 1.16 1.43
 -5 10 -6 -0.81 1.27
 -5 10 -7 29.66 6.45
 -5 -10 -7 25.65 5.07
 -5 10 -7 33.97 8.41
 -5 -10 -7 25.83 5.14
 -5 10 -8 16.58 5.27
 -5 -10 -8 10.28 3.31
 -5 10 -8 8.58 4.63
 -5 -10 -8 11.6 3.58
 -5 10 -9 12.29 4.8
 -5 -10 -9 10.6 3.47
 -5 10 -9 7.09 3.44
 -5 -10 -9 12.41 3.74
 -5 10 -10 0.58 2.34
 -5 -10 -10 1.29 1.84
 -5 10 -10 3.8 3.9
 -5 -10 -10 5.39 3.17
 -5 10 -11 4.1 2.97
 -5 -10 -11 2.42 2.91
 -5 -10 -12 4.75 2.43
 -5 -10 -12 4.68 2.33
 -5 10 -12 8.37 4.66
 -5 -10 -13 6.05 3.69
 -5 -10 -13 6.56 3.18
 -5 10 -13 4.68 3.78
 -5 -10 -14 12.11 4.54
 -5 -10 -14 8.81 3.72
 -5 10 -14 10.88 5.67
 -5 -10 -15 4.07 3.2
 -5 -11 16 14.46 9.02
 5 11 -10 5.28 2.54
 5 11 -9 23.18 4.97
 5 11 -8 4.94 2.34
 5 -11 -7 19.47 4.82
 5 11 -7 14.98 3.79
 5 -11 -6 12.46 3.5
 -5 -11 6 8.89 2.9
 -5 11 6 2.01 4.26
 -5 11 5 7.7 2.45
 -5 11 5 18.39 8.01
 5 -11 -5 28.85 5.85
 -5 -11 5 18.33 4.03
 -5 -11 4 93.63 9.45
 5 -11 -4 115.51 11.84
 -5 11 4 57.45 8.73
 -5 11 4 77.07 11.2
 -5 11 3 25.05 5.77
 5 -11 -3 45.33 7.32
 -5 11 3 30.21 6.07
 -5 -11 3 31.92 5.32
 5 -11 -2 20.98 5.26
 -5 -11 2 14.01 3.49
 -5 11 2 11.87 4.18
 -5 11 2 12.89 3.74
 -5 -11 2 13.99 5.35
 -5 -11 1 94.3 9.27
 -5 11 1 100.65 10.4
 -5 11 1 82.53 11.02
 -5 -11 1 74.84 10.03
 -5 -11 0 6.49 2.43
 -5 11 0 5.42 2.92
 -5 11 0 4.93 2.3
 -5 -11 0 9.57 3.15
 -5 -11 -1 9.87 2.93
 -5 11 -1 11.32 3.42
 -5 11 -1 19 5.5
 -5 -11 -1 9.87 2.74
 -5 11 -2 1.64 0.95
 -5 -11 -2 0.21 1.36
 -5 -11 -2 -0.68 0.58
 -5 11 -3 44.13 7.15
 -5 -11 -3 33.35 5.27
 -5 11 -3 33.29 7.38
 -5 -11 -3 35.14 5.68
 -5 -11 -4 25.65 4.63
 -5 -11 -4 27.07 5.07
 -5 11 -4 28.17 5.86
 -5 11 -4 31.03 7.36
 -5 -11 -5 0.54 0.49
 -5 11 -5 -0.8 0.99
 -5 -11 -5 -0.59 0.82
 -5 11 -5 -1.04 2.09
 -5 -11 -6 6.43 2.8
 -5 11 -6 2.99 2.38
 -5 -11 -6 4.21 1.95
 -5 11 -6 7.37 3.85
 -5 -11 -7 -0.49 0.69
 -5 11 -7 1.42 2.19
 -5 -11 -7 -0.71 1.18
 -5 11 -7 1.77 2.29
 -5 -11 -8 11.15 3.86
 -5 11 -8 9.87 3.86
 -5 -11 -8 9.66 3.24
 -5 11 -8 9.57 4.65
 -5 11 -9 18.23 5.67
 -5 -11 -9 13.28 3.86
 -5 11 -9 17.75 6.74
 -5 -11 -9 13.07 4.27
 -5 11 -10 229.06 20.98
 -5 -11 -10 177.24 15.22
 -5 -11 -10 192.75 16.76
 -5 11 -10 217.98 23.39
 -5 11 -11 -2.7 3.7
 -5 -11 -11 -0.05 0.88
 -5 11 -12 7.4 4.15
 -5 -11 -12 5.71 2.61
 -5 11 -12 7.07 4.98
 -5 -11 -12 4.39 2.44
 -5 -11 -13 1.44 1.41
 -5 11 -13 1.5 2.07
 -5 -12 15 20.57 11.04
 5 12 -9 5.15 2.51
 5 12 -8 17.8 4.48
 5 12 -7 6.56 2.61
 -5 -12 6 0.44 0.83
 5 -12 -6 0.7 0.57
 -5 12 6 -0.48 6.17
 -5 -12 5 7.9 2.88
 -5 12 5 10.01 7.02
 5 -12 -5 16.75 4.59
 -5 -12 4 54.03 7.47
 5 -12 -4 72.05 9.88
 -5 12 4 21.65 5.56
 -5 12 4 36.95 9.62
 -5 12 3 -0.31 0.48
 -5 -12 3 0.8 0.49
 -5 12 3 -0.64 2.86
 5 -12 -3 -0.85 0.64
 -5 -12 2 7.81 2.49
 -5 12 2 9.25 3.76
 -5 12 2 10.26 3.46
 -5 -12 2 2.66 2.36
 5 -12 -2 14.27 4.44
 -5 12 1 8.09 3.47
 -5 12 1 10.33 3.24
 -5 -12 1 9.88 5.11
 -5 -12 1 8.57 2.89
 -5 -12 0 3.78 1.94
 -5 12 0 6.34 3.44
 -5 12 0 7.71 2.78
 -5 -12 0 5.39 1.94
 -5 -12 -1 1.73 0.97
 -5 12 -1 2.91 1.7
 -5 12 -1 4.65 3.26
 -5 -12 -1 3.39 1.35
 -5 -12 -2 32.19 5.58
 -5 12 -2 36.78 6.33
 -5 -12 -2 33.65 5.39
 -5 12 -2 24.76 6.69
 -5 12 -3 4.5 1.97
 -5 12 -3 5.24 3.39
 -5 -12 -3 3.71 1.77
 -5 -12 -3 4.57 2.06
 -5 12 -4 4.66 2.14
 -5 -12 -4 4.53 2.18
 -5 -12 -4 3.2 1.59
 -5 12 -4 -0.05 2.33
 -5 -12 -5 0.17 0.32
 -5 12 -5 0.81 0.88
 -5 -12 -5 1.32 1.36
 -5 12 -5 3.35 2.24
 -5 -12 -6 27.6 4.93
 -5 -12 -6 27.5 5.48
 -5 12 -6 36.98 7.06
 -5 12 -6 23.01 6.69
 -5 12 -7 42.16 7.71
 -5 -12 -7 38.42 6.92
 -5 12 -7 37.86 8.92
 -5 -12 -8 8.05 3.08
 -5 12 -8 6.95 3.07
 -5 12 -8 9.7 4.88
 -5 12 -9 59.68 9.8
 -5 -12 -9 50.1 8.15
 -5 12 -9 55.87 11.62
 -5 12 -10 36.31 8.09
 -5 12 -10 30.49 8.83
 -5 -12 -10 25.23 6.11
 -5 12 -11 34.83 8.38
 -5 12 -11 27.09 8.29
 -5 -12 -11 33.33 7.17
 -5 12 -12 2.77 2.65
 -5 12 -12 5.87 4.17
 -5 -12 -12 3.26 2.41
 -5 12 -13 55.82 11.26
 5 13 -8 4.51 2.08
 5 13 -7 20.66 4.96
 -5 -13 6 2.76 1.63
 -5 -13 5 73.2 9.24
 -5 -13 4 7.19 3.1
 5 -13 -4 12.26 4.22
 -5 13 4 1.75 3.23
 -5 -13 3 13.35 3.76
 -5 13 3 8.82 3.31
 -5 -13 2 2.13 1.63
 -5 13 2 2.03 2.7
 5 -13 -2 2.02 1.89
 -5 13 2 0.93 1.21
 -5 -13 1 8.14 3.13
 -5 13 1 6.77 3.49
 -5 13 1 14.9 4.03
 -5 13 0 9.16 4.19
 -5 -13 0 13.52 3.89
 -5 13 0 16.74 4.03
 -5 -13 -1 1.8 0.85
 -5 13 -1 3.55 2.7
 -5 13 -1 4.35 2.36
 -5 -13 -2 56.13 7.77
 -5 13 -2 57.85 7.97
 -5 13 -2 36.83 8.66
 -5 13 -3 -0.66 0.86
 -5 13 -3 0.36 1.18
 -5 -13 -3 1.21 1.61
 -5 13 -4 9.09 3.35
 -5 13 -4 11.37 4.88
 -5 -13 -4 8.23 2.94
 -5 13 -5 31.43 6.38
 -5 -13 -5 28.08 5.6
 -5 13 -5 31.03 7.91
 -5 13 -6 54.31 8.58
 -5 13 -6 48 10.4
 -5 -13 -6 40.01 6.9
 -5 13 -7 67.14 9.86
 -5 -13 -7 63.24 9.03
 -5 13 -7 50.52 10.89
 -5 -13 -8 12.37 4.2
 -5 13 -8 10.71 4.11
 -5 13 -8 6.01 4.05
 -5 -13 -9 2.88 2.07
 -5 13 -9 4.34 2.92
 -5 13 -9 1.25 1.58
 -5 -13 -10 6.53 3.39
 -5 13 -10 8.88 3.67
 -5 13 -10 8.08 4.97
 -5 -13 -11 30.2 7.07
 -5 13 -11 33.88 7.84
 -5 13 -11 28.23 8.67
 5 14 -8 6.11 2.82
 5 14 -7 4.75 2.44
 -5 -14 5 64.22 9.08
 -5 -14 4 12.48 3.95
 -5 -14 3 22.94 5.09
 -5 -14 2 5.86 2.69
 5 -14 -2 8.94 4.55
 -5 -14 1 10.97 3.51
 -5 14 0 5.76 3.4
 -5 -14 0 6.11 2.63
 -5 -14 -1 11.09 3.65
 -5 14 -1 6.02 3.74
 -5 -14 -2 -0.96 1.42
 -5 14 -2 0.84 2.64
 -5 14 -3 1.28 2.03
 -5 -14 -3 -0.74 1.86
 -5 14 -4 3.15 3.13
 -5 -14 -4 3.54 2.25
 -5 14 -5 20.83 6.86
 -5 -14 -5 39.65 7.06
 -5 -14 -6 -0.73 1.05
 -5 14 -6 0.71 1.08
 -5 -14 -7 18.56 5
 -5 14 -7 14.14 5.86
 -5 -14 -8 11.13 4.02
 -5 14 -8 8.18 3.51
 -5 -14 -9 2.42 2.36
 -5 14 -9 2.08 3.99
 -5 14 -10 55.87 12.29
 -5 -15 3 73.97 10
 -5 -15 2 0.49 1.01
 -5 -15 1 -0.46 0.91
 -5 -15 0 29.29 6.12
 -5 -15 -1 9.7 3.52
 -5 -15 -2 3.49 2.02
 -5 15 -2 2.25 2.21
 -5 -15 -3 1.57 1.06
 -5 15 -3 1.64 2.48
 -5 15 -4 -0.84 0.91
 -5 -15 -4 -0.09 1.53
 -5 15 -5 23.75 7.92
 -5 -15 -5 31.17 6.61
 -5 -15 -6 33.78 6.94
 -5 15 -6 29.3 8.59
 -5 -15 -7 6.51 3.12
 -5 15 -7 6.88 4.22
 -5 -16 1 3.58 2.46
 -5 -16 0 29.99 6.67
 -5 -16 -1 38.76 7.42
 -5 -16 -2 20.04 5.21
 -5 -16 -3 1.17 1.44
 -6 0 10 -2.39 4.19
 -6 0 9 -0.75 1.66
 -6 0 8 46.35 12
 -6 0 7 -2.78 4.91
 -6 0 6 53.64 8.79
 -6 0 5 0.07 0.92
 -6 0 4 2.33 1.86
 -6 0 3 0.35 0.73
 -6 0 2 128.57 12.05
 -6 0 1 2.09 2.15
 -6 0 0 186.82 15.21
 -6 0 -1 0.51 1.79
 -6 0 -2 166.87 14.77
 -6 0 -3 3.7 2.61
 -6 0 -4 223.95 18.12
 -6 0 -5 0.06 0.8
 -6 0 -5 0.17 0.75
 -6 0 -5 2.25 2
 -6 0 -6 1.39 0.4
 -6 0 -6 3.95 2.66
 -6 0 -7 0.27 1.13
 -6 0 -7 0.38 1.86
 -6 0 -8 3.5 2.61
 -6 0 -8 6.46 3.23
 -6 0 -9 0.18 0.8
 -6 0 -9 1.39 1.93
 -6 0 -10 131.44 16.06
 -6 0 -10 138.1 15.59
 -6 0 -11 2.06 3.1
 -6 0 -11 0.04 0.85
 -6 0 -12 533.04 36.59
 -6 0 -12 468.67 33.31
 -6 0 -13 0.41 1.51
 -6 0 -14 56.32 11.76
 -6 0 -15 -1.81 2.75
 -6 0 -16 30.28 9.18
 -6 1 10 6.91 6.76
 -6 1 9 7.2 5.7
 -6 -1 9 2.99 4.82
 -6 1 8 5.37 4.13
 -6 -1 8 8.34 6.48
 -6 1 7 13.15 3.9
 -6 -1 7 8.12 2.6
 -6 1 6 -0.8 1.67
 -6 -1 6 -3.43 2.95
 -6 1 5 -0.32 1.26
 -6 -1 5 -2.96 2.45
 -6 1 4 49.78 7.43
 -6 -1 4 54.23 7.65
 -6 1 3 3.64 1.86
 -6 -1 3 3.79 2.17
 -6 1 2 7.51 3.14
 -6 -1 2 10.66 3.43
 -6 1 1 168.36 14.16
 -6 -1 1 171.14 14.11
 -6 1 0 47.77 7.37
 -6 -1 0 42.95 7.03
 -6 1 -1 70.75 9.22
 -6 -1 -1 69.57 9.18
 -6 1 -2 107.56 11.86
 -6 -1 -2 112.44 11.81
 -6 1 -3 10.68 3.88
 -6 -1 -3 7.76 3.46
 -6 1 -4 0.48 1.18
 -6 1 -4 1.87 1.87
 -6 -1 -4 4.57 2.75
 -6 -1 -4 0.63 0.65
 -6 -1 -5 36.25 4.56
 -6 -1 -5 48.04 8.28
 -6 1 -5 39.99 7.5
 -6 1 -5 55.09 8.1
 -6 1 -6 20.28 4.89
 -6 -1 -6 18.1 3.46
 -6 1 -6 26.77 6.31
 -6 -1 -6 22.53 5.59
 -6 1 -7 1.88 1.76
 -6 -1 -7 3.43 2.15
 -6 -1 -7 1.03 0.4
 -6 1 -7 1.39 0.93
 -6 -1 -7 5.22 3.2
 -6 -1 -8 64.34 9.43
 -6 1 -8 60.99 10.35
 -6 -1 -8 74.86 10.93
 -6 1 -8 59.88 9.32
 -6 1 -9 59.91 10.57
 -6 -1 -9 64.21 10.39
 -6 1 -9 51.51 9.23
 -6 -1 -9 62.08 10.07
 -6 1 -10 14.24 4.78
 -6 -1 -10 25.9 6.99
 -6 1 -10 15.3 5.14
 -6 -1 -10 15.45 5.34
 -6 1 -11 -1.15 0.99
 -6 -1 -11 4.98 3.04
 -6 1 -11 4 3.45
 -6 -1 -11 5.92 3.81
 -6 1 -12 128.78 17.38
 -6 -1 -12 127.6 17.32
 -6 1 -12 96.8 14.41
 -6 -1 -12 127.86 17.31
 -6 1 -13 23.7 7.35
 -6 -1 -13 23.93 7.59
 -6 1 -14 0.96 2.28
 -6 -1 -14 2.08 2.11
 -6 1 -15 30.45 8.96
 -6 -1 -15 16.92 6.86
 -6 1 -16 7.62 4.34
 -6 -1 -16 6.32 4.75
 -6 2 10 7.67 6.47
 -6 2 9 11.85 8.3
 -6 -2 9 3.07 3.97
 -6 2 8 12.96 6.89
 -6 -2 8 16.07 7.42
 -6 2 7 18.97 5.67
 -6 -2 7 11.35 4.58
 -6 2 6 29.88 6.32
 -6 -2 6 19.11 4.99
 -6 2 5 37.96 6.68
 -6 -2 5 39.29 6.75
 -6 2 4 67.19 8.63
 -6 -2 4 61.73 8.16
 -6 2 3 141.33 12.9
 -6 -2 3 146.14 12.9
 -6 2 2 16.34 4.45
 -6 -2 2 13.46 3.74
 -6 2 1 168.78 14.4
 -6 -2 1 164.14 13.79
 -6 2 0 477.79 26.14
 -6 -2 0 434.84 24.71
 -6 2 -1 202.76 16.15
 -6 -2 -1 180.13 15.11
 -6 2 -2 157.92 14.58
 -6 -2 -2 154.63 14.14
 -6 2 -3 61.5 9.04
 -6 -2 -3 57.24 8.5
 -6 2 -3 64.39 7.04
 -6 2 -4 3.71 1.93
 -6 2 -4 1.69 2.41
 -6 -2 -4 4.46 2.01
 -6 -2 -4 3.67 1.24
 -6 -2 -5 44.94 5.08
 -6 2 -5 58.43 8.94
 -6 -2 -5 51.57 8.21
 -6 2 -5 46.93 6.9
 -6 -2 -6 45.26 5.64
 -6 2 -6 47.79 8.44
 -6 -2 -6 41.21 7.52
 -6 2 -6 38.39 6.63
 -6 -2 -7 130.21 10.96
 -6 2 -7 149.53 15.92
 -6 -2 -7 135.25 14.55
 -6 2 -7 131.3 13.45
 -6 2 -8 4.36 3.27
 -6 -2 -8 2.26 1.38
 -6 2 -8 2.31 1.88
 -6 -2 -8 4.34 2.14
 -6 2 -9 2.12 1.14
 -6 -2 -9 -0.34 1.06
 -6 2 -9 1.37 0.95
 -6 -2 -9 -0.54 0.29
 -6 2 -10 45.42 8.99
 -6 -2 -10 37.28 7.59
 -6 2 -10 45.2 9.64
 -6 -2 -10 51.11 9.81
 -6 -2 -10 42.98 7.57
 -6 2 -11 1.57 1.7
 -6 -2 -11 0.79 1.19
 -6 2 -11 3.94 3.21
 -6 -2 -11 -0.73 2.35
 -6 2 -12 26.29 7.17
 -6 -2 -12 35.73 8.51
 -6 2 -12 36.02 8.96
 -6 -2 -12 30.26 7.75
 -6 2 -13 -1.91 2.69
 -6 -2 -13 3.01 2.54
 -6 -2 -13 1.71 2.94
 -6 2 -14 29.18 8.89
 -6 -2 -14 36.43 9.46
 -6 2 -15 82.14 15.02
 -6 -2 -15 90.74 16.19
 -6 2 -16 1.5 2.11
 -6 -2 -16 2.36 2.83
 -6 3 10 11.45 8.7
 -6 3 9 59.9 17.91
 -6 3 8 13.4 7.23
 -6 -3 8 17.06 8.29
 -6 3 7 14.1 4.51
 -6 -3 7 19.58 7.63
 -6 3 6 2.75 0.66
 -6 -3 6 -0.33 2.31
 -6 3 5 2.94 1.41
 -6 -3 5 3.64 1.83
 -6 3 4 2.82 2.4
 -6 -3 4 0.54 0.87
 -6 3 3 64.44 8.55
 -6 -3 3 58.12 7.95
 -6 3 2 2.72 2.02
 -6 -3 2 2.04 2.28
 -6 3 1 113.25 11.49
 -6 -3 1 105.07 10.67
 -6 -3 0 34.01 6.05
 -6 3 0 33.46 6.26
 -6 3 -1 37.65 6.82
 -6 -3 -1 29.37 5.81
 -6 3 -2 14.61 2.91
 -6 3 -2 14.8 4.74
 -6 -3 -2 13.89 4
 -6 3 -3 40.79 7.38
 -6 -3 -3 33.08 6.39
 -6 3 -3 32.34 4.82
 -6 3 -4 65.6 9.61
 -6 -3 -4 55.35 8.43
 -6 -3 -4 58.1 5.13
 -6 3 -4 57.85 7.33
 -6 -3 -5 74.34 6.69
 -6 3 -5 83.65 11.02
 -6 -3 -5 76.17 10.18
 -6 3 -5 74.38 8.94
 -6 3 -6 2.32 1.61
 -6 3 -6 1.94 1.06
 -6 -3 -6 4.34 2.77
 -6 -3 -6 2.81 1.37
 -6 3 -7 0.02 0.83
 -6 3 -7 0.32 0.79
 -6 -3 -7 -0.46 1.1
 -6 -3 -7 0.56 0.93
 -6 3 -8 2.93 1.97
 -6 3 -8 2.31 2.21
 -6 -3 -8 7.29 3.41
 -6 -3 -8 6.14 2.26
 -6 3 -9 10.17 3.94
 -6 -3 -9 12.37 3.79
 -6 3 -9 16.54 6.24
 -6 -3 -9 9.93 4.06
 -6 3 -10 3.66 1.83
 -6 -3 -10 1.86 1.04
 -6 3 -10 8.54 4.85
 -6 -3 -10 4.28 3.2
 -6 3 -11 9.43 4.06
 -6 -3 -11 11.77 3.98
 -6 3 -11 26.69 7.62
 -6 -3 -11 14.67 5.33
 -6 3 -12 12.79 4.62
 -6 -3 -12 15.79 4.95
 -6 3 -12 23.09 7.28
 -6 -3 -12 12.8 4.72
 -6 3 -13 26.76 8.12
 -6 -3 -13 34.97 8.21
 -6 -3 -13 45.5 8.98
 -6 -3 -13 48.18 10.41
 -6 3 -14 25.21 7.76
 -6 -3 -14 21.42 6.94
 -6 -3 -14 24.93 6.91
 -6 3 -15 1.35 1.93
 -6 -3 -15 0.34 1.81
 -6 -3 -15 1.52 2.18
 -6 3 -16 0.2 1.07
 -6 -3 -16 -0.75 2.23
 -6 4 10 2.51 4.98
 -6 4 9 1.97 2.33
 -6 -4 9 0.97 3.87
 -6 4 8 17.94 7.89
 -6 -4 8 8.79 6.81
 -6 4 7 18.12 5.14
 -6 -4 7 11.81 6.46
 -6 4 6 1.22 1.89
 -6 -4 6 0.3 3.2
 -6 4 5 5.86 2.4
 -6 -4 5 2.99 1.41
 -6 4 4 16.71 4.34
 -6 -4 4 17.88 4.61
 -6 4 3 29.46 5.84
 -6 -4 3 26.07 5.29
 -6 4 2 74.33 9.31
 -6 -4 2 77.35 9.05
 -6 4 1 0.42 2.03
 -6 -4 1 2.36 1.54
 -6 4 0 75.89 9.6
 -6 -4 0 71.14 8.76
 -6 4 -1 6.54 2.78
 -6 -4 -1 11.21 3.44
 -6 4 -2 2.47 2.06
 -6 -4 -2 0.81 1.31
 -6 -4 -3 34.74 6.46
 -6 4 -3 31.26 6.46
 -6 4 -3 27.42 4.67
 -6 4 -4 8.44 2.77
 -6 4 -4 10.58 3.93
 -6 -4 -4 7.41 2.6
 -6 -4 -5 37.1 6.97
 -6 -4 -5 27.38 3.96
 -6 4 -5 35.86 7.29
 -6 4 -5 30.86 6.06
 -6 4 -6 3.51 2.22
 -6 4 -6 1.81 1.3
 -6 -4 -6 4.46 2.27
 -6 -4 -6 3.39 1.43
 -6 -4 -7 64.95 7.53
 -6 4 -7 81.93 11.69
 -6 -4 -7 78.21 10.66
 -6 4 -7 84.03 11.36
 -6 -4 -8 68.57 8.24
 -6 4 -8 82.92 12.21
 -6 -4 -8 94.59 12.12
 -6 4 -8 81.83 11.87
 -6 -4 -9 35.17 6.15
 -6 -4 -9 46.4 8.71
 -6 4 -9 43.56 8.93
 -6 4 -9 42.94 8.89
 -6 -4 -10 72.6 9.64
 -6 4 -10 89.56 13.68
 -6 -4 -10 78.22 11.94
 -6 4 -10 88.29 13.37
 -6 4 -11 2.29 2.37
 -6 4 -11 -1.29 2.3
 -6 -4 -11 -0.85 2.07
 -6 -4 -11 0.49 0.49
 -6 4 -12 16.35 6.37
 -6 4 -12 20.94 6.77
 -6 -4 -12 22.24 6.63
 -6 -4 -12 14.6 4.6
 -6 4 -13 34.13 9.25
 -6 -4 -13 27.19 6.87
 -6 -4 -13 37.82 8.95
 -6 4 -14 10.95 5.84
 -6 -4 -14 1.13 1.01
 -6 4 -15 16.74 6.66
 -6 4 -16 30.96 9.22
 -6 5 9 0.21 1.07
 -6 5 8 5.68 5.7
 -6 -5 8 -0.54 2.9
 -6 5 7 -3.3 5.08
 -6 -5 7 4.91 5.12
 -6 5 6 -2.59 2.47
 -6 -5 6 -2.78 3.44
 -6 5 5 278.01 20.28
 -6 -5 5 248.64 20.52
 -6 5 4 0.48 0.76
 -6 -5 4 0.43 1.12
 -6 5 3 43.34 7.13
 -6 -5 3 43.36 6.87
 -6 5 2 18.98 4.56
 -6 -5 2 13.57 3.92
 -6 5 1 31.68 6.1
 -6 -5 1 29.48 5.45
 -6 5 0 2.45 0.25
 -6 -5 0 4.13 1.95
 -6 5 -1 46.41 7.49
 -6 -5 -1 46.27 7.05
 -6 5 -2 100.8 11.71
 -6 -5 -2 89.68 10.21
 -6 5 -3 6.25 3.31
 -6 -5 -3 8.44 3.01
 -6 5 -3 6.84 2.61
 -6 5 -4 23.28 5.72
 -6 -5 -4 29.05 5.89
 -6 5 -4 32.61 6.01
 -6 -5 -5 24.78 3.84
 -6 5 -5 24.46 5.9
 -6 -5 -5 22.73 5.31
 -6 5 -5 30.05 6.38
 -6 5 -6 2.03 0.66
 -6 -5 -6 6.2 2.98
 -6 -5 -6 4.29 1.67
 -6 5 -6 5.11 3.12
 -6 -5 -7 33.57 5.25
 -6 -5 -7 39.35 7.47
 -6 5 -7 36.14 7.84
 -6 5 -7 36.41 7.85
 -6 5 -8 2.83 2.88
 -6 -5 -8 0.77 1.68
 -6 -5 -8 0.63 0.77
 -6 5 -8 0.93 1.03
 -6 5 -9 27.63 7.31
 -6 -5 -9 17.66 5.59
 -6 -5 -9 20.52 4.82
 -6 5 -9 22.06 6.5
 -6 5 -10 2.87 2.64
 -6 -5 -10 3.18 2.4
 -6 -5 -10 4.14 1.92
 -6 5 -10 1.56 1.8
 -6 5 -11 21.66 6.98
 -6 -5 -11 14.24 5.13
 -6 -5 -11 15.38 4.55
 -6 5 -11 15.7 6.14
 -6 5 -12 0.37 1.14
 -6 -5 -12 2.66 1.93
 -6 -5 -12 2.78 2.25
 -6 5 -12 5.66 3.93
 -6 -5 -13 2.62 3.35
 -6 -5 -13 -0.7 2.77
 -6 5 -13 3.88 3.31
 -6 5 -14 2.25 3.08
 -6 5 -15 37.03 10.91
 -6 6 8 5.8 6.26
 -6 -6 8 2.05 3.5
 -6 6 7 47.45 12.09
 -6 -6 7 30.64 12.31
 -6 6 6 4.9 0.68
 -6 -6 6 9.97 6.02
 -6 6 5 18.13 4.87
 -6 -6 5 11.31 3.99
 -6 6 4 1.52 1.18
 -6 -6 4 -0.2 1.32
 -6 6 3 98.24 10.9
 -6 -6 3 75.04 9.37
 -6 6 2 82.09 9.94
 -6 -6 2 71.18 8.82
 -6 6 1 20.83 4.73
 -6 -6 1 14.68 3.8
 -6 6 0 -0.42 1.4
 -6 -6 0 0.7 0.71
 -6 6 -1 21.26 5.18
 -6 -6 -1 19.23 4.3
 -6 6 -2 27.65 6.07
 -6 -6 -2 22.66 4.97
 -6 6 -3 2.45 2.44
 -6 -6 -3 1.88 1.58
 -6 6 -4 41.67 7.85
 -6 -6 -4 39.21 6.84
 -6 6 -4 37.05 6.97
 -6 6 -5 13.02 4.31
 -6 -6 -5 9.46 3.49
 -6 6 -5 11.62 4.07
 -6 6 -6 14.09 4.89
 -6 -6 -6 17.61 4.64
 -6 -6 -6 11.14 2.93
 -6 6 -6 20.9 5.75
 -6 6 -7 51.68 9.48
 -6 -6 -7 39.09 7.38
 -6 -6 -7 29.32 4.91
 -6 6 -7 35.6 7.93
 -6 6 -8 3.37 2.58
 -6 -6 -8 5.41 3.16
 -6 -6 -8 0.05 0.67
 -6 6 -8 1.56 2.66
 -6 6 -9 0.45 1.83
 -6 -6 -9 2.46 2.52
 -6 -6 -9 0.55 1.13
 -6 6 -9 -0.89 1.84
 -6 -6 -10 81.41 10.14
 -6 6 -10 96.52 14.27
 -6 -6 -10 85.81 11.92
 -6 6 -10 97.6 15.08
 -6 6 -11 17.13 6.19
 -6 -6 -11 20.22 6.06
 -6 -6 -11 16.75 5.08
 -6 6 -11 22.77 7.44
 -6 -6 -12 8.36 3.71
 -6 -6 -12 4 1.33
 -6 6 -12 4.7 3.68
 -6 -6 -13 11.36 4.2
 -6 6 -13 14.71 6.38
 -6 6 -14 20.46 7.88
 -6 6 -15 9.12 4.85
 -6 7 9 1.98 4.5
 -6 7 8 9.61 6.86
 -6 7 7 20.42 8.16
 -6 -7 7 9.3 7.64
 -6 7 6 -3.78 4.08
 -6 -7 6 2.98 3.92
 -6 7 5 51.77 8.65
 -6 -7 5 25.53 7.37
 -6 7 4 86.84 10.55
 -6 -7 4 67.03 9.94
 -6 7 3 2.3 2.17
 -6 -7 3 0.52 0.93
 -6 7 2 90.81 10.54
 -6 -7 2 82.87 9.59
 -6 7 1 -1.37 1.44
 -6 -7 1 -0.46 0.07
 -6 7 0 12.77 3.81
 -6 -7 0 13.03 3.56
 -6 7 -1 26.36 5.66
 -6 -7 -1 23.07 4.9
 -6 7 -2 0.92 1.63
 -6 -7 -2 -1.41 1.7
 -6 7 -3 18.46 5.01
 -6 -7 -3 16.2 4.09
 -6 -7 -4 56.08 7.95
 -6 7 -4 8.44 3.31
 -6 7 -5 2.73 1.73
 -6 -7 -5 7.3 3.23
 -6 7 -6 16.16 5.45
 -6 -7 -6 16.05 4.69
 -6 7 -6 15.81 5.11
 -6 7 -7 29.65 7.12
 -6 -7 -7 19.09 5.28
 -6 7 -7 26.43 7.29
 -6 7 -8 -0.29 1.81
 -6 -7 -8 2.73 2.35
 -6 7 -8 2.12 2.51
 -6 7 -9 0.47 1.85
 -6 -7 -9 0.76 1.68
 -6 7 -9 -0.38 1.33
 -6 7 -10 14.27 5.64
 -6 -7 -10 9.86 4.09
 -6 7 -10 12.19 5.43
 -6 7 -11 8.86 3.86
 -6 -7 -11 12.26 4.74
 -6 7 -11 8.45 4.36
 -6 -7 -12 63.39 10.82
 -6 7 -12 74.08 14.38
 -6 -7 -13 7.99 4.3
 -6 7 -13 12.39 6.13
 -6 7 -14 24.81 8.75
 -6 8 8 22.7 12.26
 -6 8 7 10.83 7.56
 -6 -8 7 -2.42 2.04
 -6 8 6 -4.78 4.53
 -6 -8 6 1.26 1.67
 -6 8 5 9.63 3.58
 -6 -8 5 8.82 5.29
 -6 8 4 146.71 14.14
 -6 -8 4 91.67 13.17
 -6 8 3 35.95 6.75
 -6 -8 3 36.48 7.02
 -6 8 2 1.31 1.14
 -6 -8 2 3.18 2.25
 -6 8 1 1.93 1.7
 -6 -8 1 1.1 1.26
 -6 8 0 2 1.08
 -6 -8 0 1.56 0.85
 -6 8 -1 0.74 0.61
 -6 -8 -1 1.59 1.45
 -6 8 -2 20.98 5.39
 -6 -8 -2 16.27 3.97
 -6 8 -3 15.4 4.68
 -6 -8 -3 10.34 3.19
 -6 8 -4 6.62 3.46
 -6 -8 -4 7.53 2.8
 -6 8 -5 22.81 5.9
 -6 -8 -5 13.58 4.04
 -6 8 -6 14.74 4.84
 -6 -8 -6 10.5 3.64
 -6 8 -7 12.54 4.66
 -6 -8 -7 8.84 3.32
 -6 8 -8 3.39 2.37
 -6 -8 -8 3.86 2.22
 -6 8 -8 2.29 2.33
 -6 8 -9 1.8 2.23
 -6 -8 -9 1.28 1.28
 -6 8 -9 4.65 2.95
 -6 8 -10 -1.02 1.79
 -6 -8 -10 0.19 1.42
 -6 8 -10 1.16 2.12
 -6 8 -11 13.19 4.97
 -6 -8 -11 10.95 4.27
 -6 8 -11 13.59 6.31
 -6 -8 -12 8.93 4.11
 -6 8 -12 11.44 5.41
 -6 -8 -13 14.79 5.61
 -6 8 -13 14.63 6.57
 -6 9 7 21.7 11.33
 -6 9 6 -0.73 3.58
 -6 9 5 5.15 2.51
 -6 -9 5 -2.06 3.93
 -6 9 4 5.78 3.12
 -6 -9 4 10.99 5.95
 -6 9 3 0.7 1.51
 -6 -9 3 -13.08 4.81
 -6 9 2 17.77 4.72
 -6 -9 2 14.07 4.32
 -6 9 1 68.59 9.36
 -6 -9 1 65.72 8.66
 -6 9 0 27.39 5.93
 -6 -9 0 28.69 5.52
 -6 9 -1 4.69 2.53
 -6 -9 -1 4.72 2.15
 -6 9 -2 1.76 1.48
 -6 -9 -2 0.23 0.91
 -6 9 -3 13.44 4.31
 -6 -9 -3 11.58 3.43
 -6 9 -4 6.27 3.46
 -6 -9 -4 0.81 0.94
 -6 9 -5 13.41 4.55
 -6 -9 -5 10.88 3.72
 -6 9 -6 5.13 3.25
 -6 -9 -6 1.99 1.05
 -6 9 -7 23.51 6.38
 -6 -9 -7 14.16 4.26
 -6 9 -8 1.77 1.64
 -6 -9 -8 3.76 2.52
 -6 9 -9 3.33 1.8
 -6 -9 -9 3.64 2.47
 -6 9 -10 7.21 3.87
 -6 -9 -10 4.21 2.79
 -6 -9 -11 24.56 6.32
 -6 -9 -12 1.88 1.21
 -6 10 8 2.58 5.18
 -6 10 7 13.66 9.13
 -6 10 6 26.38 9.98
 -6 10 5 7.19 1.98
 -6 10 4 38.57 7.6
 -6 -10 4 16.78 8.32
 -6 10 3 7.17 3.37
 -6 -10 3 5.12 2.98
 -6 10 2 3.03 2.18
 -6 -10 2 -1.33 3.15
 -6 10 1 116.97 12.49
 -6 -10 1 99.76 11.45
 -6 10 0 8.55 3.02
 -6 -10 0 5.42 2.52
 -6 10 -1 5.21 2.92
 -6 -10 -1 3.93 1.86
 -6 10 -2 40.7 7.36
 -6 -10 -2 33.14 5.87
 -6 10 -3 -0.26 0.6
 -6 -10 -3 0.1 0.54
 -6 10 -4 5.51 3.23
 -6 -10 -4 1.96 1.59
 -6 10 -5 15.06 4.75
 -6 -10 -5 8.81 3.14
 -6 10 -6 6.6 3
 -6 -10 -6 6.55 2.36
 -6 10 -7 -0.4 0.9
 -6 -10 -7 1.71 1.53
 -6 10 -8 0.52 1.29
 -6 -10 -8 0.49 1.13
 -6 10 -9 3.08 2.5
 -6 -10 -9 1.36 0.64
 -6 -10 -10 32.64 6.8
 -6 -10 -11 1.53 1.63
 -6 11 6 3.69 3.61
 -6 11 5 2.93 3.71
 -6 11 4 0.9 3.68
 -6 11 3 -0.8 2.34
 -6 -11 3 -0.47 4.42
 -6 11 2 19.18 5.14
 -6 -11 2 14.33 5.3
 -6 11 1 1.06 2.04
 -6 -11 1 -2.42 3.09
 -6 11 0 1.66 1.41
 -6 -11 0 1.07 1.93
 -6 11 -1 2.16 2.05
 -6 -11 -1 1.72 1.54
 -6 11 -2 1.72 2.11
 -6 -11 -2 1.58 1.58
 -6 11 -3 1.84 1.72
 -6 -11 -3 4.51 2.2
 -6 11 -4 19.95 5.63
 -6 -11 -4 20.49 4.54
 -6 11 -5 1.45 2.4
 -6 -11 -5 -0.74 1.08
 -6 11 -6 11.7 4.31
 -6 -11 -6 8.69 3.33
 -6 11 -7 15.14 5.07
 -6 -11 -7 12.53 3.92
 -6 11 -8 13.34 4.91
 -6 11 -9 3 2.84
 -6 12 6 -2.24 3.15
 -6 12 5 2.35 3.7
 -6 12 4 -2.82 3.65
 -6 12 3 -0.51 2.76
 -6 12 2 7.87 3.01
 -6 12 1 20.84 5.41
 -6 12 0 4.41 2.1
 -6 12 -1 24.87 5.82
 -6 12 -2 5.77 3.1
 -6 12 -3 5.06 2.89
 -6 12 -4 87.73 11.61
 -6 12 -5 10.55 4.16
 -6 12 -6 15.65 5.03
 -6 12 -7 29.57 7.13
 -6 12 -8 2.17 2.34
 -6 13 -1 0.33 0.63
 -6 13 -2 1.03 1.43
 -6 13 -3 26.72 6.13
 -6 13 -4 4.26 2.1
 -7 0 10 12.97 10.02
 -7 0 9 7.04 7.48
 -7 0 8 13.68 7.89
 -7 0 7 -10.65 5.3
 -7 0 6 22.75 6.05
 -7 0 5 3.97 2.57
 -7 0 4 23.8 5.78
 -7 0 3 -0.47 0.38
 -7 0 2 0.64 0.25
 -7 0 1 0.03 0.91
 -7 0 0 19.55 5.15
 -7 0 -1 3.35 2.14
 -7 0 -2 150.49 15.21
 -7 0 -3 2.38 2.41
 -7 0 -4 20.99 5.86
 -7 0 -5 -0.07 2.07
 -7 0 -6 49.66 9.37
 -7 0 -7 1.02 1.39
 -7 1 10 7.2 7.78
 -7 -1 10 3.51 4.61
 -7 1 9 3.6 4.54
 -7 -1 9 4.26 4.82
 -7 1 8 13.49 7.59
 -7 -1 8 1.72 5.86
 -7 1 7 -12.73 5.82
 -7 -1 7 -2.63 3.85
 -7 1 6 3.79 3.23
 -7 -1 6 -1.73 3.7
 -7 1 5 75.53 10.85
 -7 -1 5 69.31 10.66
 -7 1 4 51.63 8.67
 -7 -1 4 57.15 8.84
 -7 1 3 2.24 1.93
 -7 -1 3 2 1.83
 -7 1 2 64.59 9.4
 -7 -1 2 62.2 9.2
 -7 1 1 2.22 1.37
 -7 -1 1 1.47 1.17
 -7 1 0 151.1 14.85
 -7 -1 0 144.81 14.4
 -7 1 -1 2.07 1.78
 -7 -1 -1 -2.32 2.13
 -7 1 -2 1.54 1.61
 -7 -1 -2 0.8 0.86
 -7 1 -3 1.17 1.54
 -7 -1 -3 2.91 2.42
 -7 1 -4 20.02 5.77
 -7 -1 -4 19.05 5.54
 -7 1 -5 29.78 7.12
 -7 -1 -5 33.55 7.47
 -7 1 -6 22.33 6.16
 -7 -1 -6 25.43 6.5
 -7 1 -7 3.55 3.31
 -7 -1 -7 2.01 2.2
 -7 2 10 2.94 5.18
 -7 2 9 8.87 7.33
 -7 -2 9 5.32 5.67
 -7 2 8 15.12 8.08
 -7 -2 8 13.71 9.44
 -7 2 7 20.59 6.92
 -7 -2 7 33.94 10.02
 -7 2 6 13.51 5.09
 -7 -2 6 5.72 1.11
 -7 2 5 126.47 14.28
 -7 -2 5 103.48 13.28
 -7 2 4 13.25 4.51
 -7 -2 4 10.01 3.77
 -7 2 3 37.61 7.3
 -7 -2 3 37.23 7.13
 -7 -2 2 47.84 7.84
 -7 2 2 36.23 6.99
 -7 2 1 45.82 7.88
 -7 -2 1 45.33 7.8
 -7 2 0 3.44 2.28
 -7 -2 0 4.17 2.75
 -7 2 -1 0.89 2
 -7 -2 -1 1.32 0.69
 -7 2 -2 34.09 7.21
 -7 -2 -2 28.78 6.16
 -7 2 -3 25.98 6.69
 -7 -2 -3 17.48 5.16
 -7 2 -4 3.22 2.52
 -7 -2 -4 1.47 2.03
 -7 2 -5 40.43 8.59
 -7 -2 -5 39.85 8.17
 -7 2 -6 3.29 2.88
 -7 -2 -6 5.95 3.69
 -7 2 -7 44.47 9.29
 -7 -2 -7 36.41 8.11
 -7 3 10 0.96 0.44
 -7 3 9 5.67 7.32
 -7 3 8 9.49 6.49
 -7 -3 8 5.41 5.26
 -7 3 7 -15.13 6.42
 -7 -3 7 6.7 6.45
 -7 3 6 29.11 7.28
 -7 -3 6 29.35 8.06
 -7 3 5 7.25 3.01
 -7 -3 5 3.89 1.41
 -7 3 4 39.05 7.57
 -7 -3 4 31.63 6.87
 -7 3 3 14.85 4.65
 -7 -3 3 24.02 5.69
 -7 3 2 67.31 9.72
 -7 -3 2 59.71 9.01
 -7 3 1 8.5 3.64
 -7 -3 1 1.58 1.41
 -7 3 0 14.59 4.56
 -7 -3 0 15.92 4.58
 -7 3 -1 19.58 5.33
 -7 -3 -1 16.66 4.7
 -7 3 -2 2.79 0.9
 -7 -3 -2 2.01 1.5
 -7 3 -3 16.47 5.25
 -7 -3 -3 10.85 3.51
 -7 3 -4 0.72 1.88
 -7 -3 -4 1.51 1.28
 -7 3 -5 8.9 4.27
 -7 -3 -5 12.92 4.82
 -7 3 -6 17.68 5.8
 -7 -3 -6 14.05 4.87
 -7 -3 -7 5.2 2.57
 -7 4 9 13.65 8.8
 -7 -4 9 0.03 2.03
 -7 4 8 3.88 5.55
 -7 -4 8 0.97 4.59
 -7 4 7 1.66 2.69
 -7 -4 7 6.66 5.77
 -7 4 6 2.83 2.3
 -7 -4 6 -10.35 5.13
 -7 4 5 1.38 2.04
 -7 -4 5 -0.24 2.93
 -7 4 4 0.67 1.85
 -7 -4 4 -0.42 1.3
 -7 4 3 4.86 2.54
 -7 -4 3 5.87 3.16
 -7 4 2 -0.03 0.14
 -7 -4 2 0.48 2.36
 -7 4 1 5.39 3.15
 -7 -4 1 7.44 3.23
 -7 4 0 0.57 1.57
 -7 -4 0 0.01 1.94
 -7 4 -1 5.65 3.18
 -7 -4 -1 7.71 3.29
 -7 -4 -2 38.43 7.32
 -7 4 -2 33.83 7.34
 -7 4 -3 9.89 4.16
 -7 -4 -3 7.25 3.22
 -7 4 -4 57.94 10.04
 -7 -4 -4 50.39 8.74
 -7 4 -5 2.25 3.03
 -7 -4 -5 -0.02 1.11
 -7 4 -6 -0.93 1.57
 -7 -4 -6 0.2 1.13
 -7 -4 -7 3.73 2.32
 -7 5 9 2.78 4.16
 -7 5 8 2.05 2.16
 -7 -5 8 5.7 4.37
 -7 5 7 4 2.43
 -7 -5 7 -0.32 4
 -7 5 6 -3.21 3.71
 -7 -5 6 4.81 3.85
 -7 5 5 67.78 10.75
 -7 -5 5 47.58 9.7
 -7 5 4 -0.36 1.35
 -7 -5 4 0.75 1.25
 -7 5 3 45.78 8.13
 -7 -5 3 44.31 7.94
 -7 5 2 29.95 6.61
 -7 -5 2 25.87 5.77
 -7 5 1 22.99 5.56
 -7 -5 1 24.16 5.52
 -7 5 0 4.64 2.07
 -7 -5 0 9.34 3.37
 -7 5 -1 2.04 2.02
 -7 -5 -1 -0.34 0.68
 -7 5 -2 14.68 4.99
 -7 -5 -2 8.93 3.38
 -7 5 -3 18.01 5.54
 -7 -5 -3 17.47 4.89
 -7 5 -4 4.22 3.1
 -7 -5 -4 7.55 3.32
 -7 5 -5 2.6 2.3
 -7 -5 -5 -0.28 1.47
 -7 -5 -6 2.52 1.63
 -7 -5 -7 6.58 3.91
 -7 6 8 9.64 7.99
 -7 6 7 37.5 11.65
 -7 -6 7 11.72 8.14
 -7 6 6 10.79 4.26
 -7 -6 6 10.33 5.91
 -7 6 5 0.72 1.45
 -7 -6 5 -12.52 5.59
 -7 6 4 20.87 5.65
 -7 -6 4 13.96 4.69
 -7 6 3 43.85 8.06
 -7 -6 3 39.92 7.58
 -7 6 2 3.87 2.63
 -7 -6 2 5.24 2.98
 -7 6 1 0.73 0.59
 -7 -6 1 0.44 1.32
 -7 6 0 -0.87 0.36
 -7 -6 0 -0.16 1.47
 -7 6 -1 34.2 7.29
 -7 -6 -1 28.09 6.11
 -7 6 -2 1.58 0.79
 -7 -6 -2 0.51 0.94
 -7 6 -3 8.57 3.74
 -7 -6 -3 5.07 2.85
 -7 6 -4 34.3 7.7
 -7 -6 -4 35.01 7.08
 -7 6 -5 3.78 3.26
 -7 -6 -5 3.59 2.71
 -7 -6 -6 3.29 1.99
 -7 -6 -7 45.9 8.69
 -7 7 8 1.81 3.31
 -7 7 7 16.68 8.83
 -7 -7 7 -2.93 4.48
 -7 7 6 -4.07 5.55
 -7 -7 6 6.06 6.47
 -7 7 5 2.56 2.04
 -7 -7 5 3.74 3.51
 -7 7 4 3.21 2.01
 -7 -7 4 -3.36 3.19
 -7 7 3 23.85 5.85
 -7 -7 3 17.99 5.06
 -7 7 2 16.9 5.15
 -7 -7 2 11.95 3.97
 -7 7 1 1.13 1.5
 -7 -7 1 0.23 0.86
 -7 7 0 2.25 1.99
 -7 -7 0 1.55 1.12
 -7 7 -1 1.94 2.12
 -7 -7 -1 2.27 2.28
 -7 7 -2 14.44 4.79
 -7 -7 -2 13.16 4.18
 -7 7 -3 4.07 2.82
 -7 -7 -3 3.39 2.26
 -7 7 -4 8.43 4.32
 -7 -7 -4 7.03 3.26
 -7 -7 -5 7.12 3.05
 -7 -7 -6 1.26 1.42
 -7 -7 -7 0.25 0.54
 -7 8 7 4.61 5.75
 -7 -8 7 1.03 1.93
 -7 8 6 5.01 4.26
 -7 -8 6 5.65 4.88
 -7 8 5 -13.01 5.24
 -7 -8 5 0.28 2.62
 -7 8 4 5.35 2.93
 -7 -8 4 -3.24 2.64
 -7 8 3 0.97 1.78
 -7 -8 3 -2.44 3.53
 -7 8 2 22.03 5.7
 -7 -8 2 18.68 5.18
 -7 8 1 0.55 0.91
 -7 -8 1 3.13 1.76
 -7 8 0 24.88 6.18
 -7 -8 0 24.79 5.81
 -7 8 -1 0.97 2.36
 -7 -8 -1 0.91 0.78
 -7 8 -2 32.75 7.54
 -7 -8 -2 22.35 5.5
 -7 8 -3 0.8 1.61
 -7 -8 -3 -0.61 0.41
 -7 -8 -4 7.37 3.05
 -7 -8 -5 6.11 3.13
 -7 -8 -6 1.09 1.84
 -7 9 6 18.05 8.05
 -7 9 5 4.57 2.1
 -7 -9 5 12.2 9.03
 -7 9 4 5.76 2.81
 -7 -9 4 8.85 5.31
 -7 9 3 20.82 5.72
 -7 -9 3 7.28 3.38
 -7 9 2 2.89 1.87
 -7 -9 2 -0.62 2.65
 -7 9 1 3.13 2.96
 -7 -9 1 0.93 1.54
 -7 9 0 19.65 5.58
 -7 -9 0 11.14 3.8
 -7 9 -1 11.02 4.04
 -7 -9 -1 7.77 3.23
 -7 -9 -2 43.36 7.66
 -7 9 -2 42.42 8.34
 -7 -9 -3 10.6 3.78
 -7 -9 -4 13.26 4.34
 -7 -9 -5 0.14 1.1
 -7 -9 -6 2.24 1.47
 -7 10 4 6.65 2.73
 -7 -10 4 7.43 5.95
 -7 10 3 6.59 3.48
 -7 -10 3 14.29 7.37
 -7 10 2 2.32 1.66
 -7 -10 2 -12.05 5.14
 -7 10 1 27.01 6.56
 -7 -10 1 11.45 4.38
 -7 10 0 6.54 2.46
 -7 -10 0 2.25 1.71
 -7 -10 -1 25.62 5.88
 -7 -10 -2 7.32 2.91
 -7 -10 -3 5.23 2.65
 -7 -10 -4 21.85 5.44

_iucr_refine_instructions_details
;
TITL exp_975_a.res in P2(1)/c
    exp_975.res
    created by SHELXL-2017/1 at 13:57:28 on 16-Nov-2017
REM Old TITL exp_975_a.res in P2(1)/c
REM SHELXT solution in P2(1)/c
REM R1 0.126, Rweak 0.006, Alpha 0.019, Orientation as input
REM Formula found by SHELXT: C22 O2 N3
CELL 0.71073 6.0252 14.9032 19.2088 90 93.713 90
ZERR 4 0.0003 0.0008 0.0012 0 0.006 0
LATT 1
SYMM -X,0.5+Y,0.5-Z
SFAC C H N O
UNIT 88 68 12 8

L.S. 20
PLAN  20
SIZE 0.12 0.15 0.18
BOND $H
list 4
fmap 2 53
acta
OMIT -3 50
REM <olex2.extras>
REM <HklSrc "%.\\exp_975.hkl">
REM </olex2.extras>

WGHT    0.063900    0.265800
FVAR       0.62817
O1    4    0.577926    0.162446    0.247579    11.00000    0.03452    0.02025 =
         0.03193   -0.00005   -0.00090    0.00072
O2    4    1.187983    0.366019    0.341490    11.00000    0.02527    0.03243 =
         0.04008   -0.00183    0.00087    0.00399
N1    3    0.770756    0.281045    0.295290    11.00000    0.02516    0.02258 =
         0.02158    0.00321   -0.00019    0.00223
N3    3    0.864929    0.123124    0.432831    11.00000    0.02762    0.02528 =
         0.02035    0.00142   -0.00288    0.00119
N2    3    0.888191    0.223315    0.342336    11.00000    0.02378    0.02290 =
         0.02433    0.00610    0.00161    0.00480
C18   1    0.770199    0.191406    0.397284    11.00000    0.02255    0.01988 =
         0.01949   -0.00372   -0.00342   -0.00238
C9    1    0.605006    0.243610    0.250260    11.00000    0.02626    0.02240 =
         0.01901    0.00029    0.00605    0.00015
C6    1    0.491639    0.401051    0.220556    11.00000    0.02631    0.02441 =
         0.01702   -0.00030    0.00387   -0.00137
C7    1    0.670635    0.431549    0.267026    11.00000    0.02794    0.02203 =
         0.01899   -0.00046    0.00248   -0.00136
AFIX  43
H7    2    0.693853    0.492875    0.272731    11.00000   -1.20000
AFIX   0
C1    1    0.462533    0.308290    0.210631    11.00000    0.02727    0.02386 =
         0.01633   -0.00067    0.00404    0.00043
C8    1    0.806583    0.373613    0.302776    11.00000    0.02459    0.02174 =
         0.02001    0.00023    0.00431   -0.00028
C2    1    0.284308    0.276207    0.167663    11.00000    0.03582    0.02167 =
         0.01965   -0.00121    0.00056   -0.00304
AFIX  43
H2    2    0.267888    0.214906    0.159870    11.00000   -1.20000
AFIX   0
C16   1    0.819406    0.514935    0.418597    11.00000    0.02592    0.02880 =
         0.02257    0.00290   -0.00416    0.00263
AFIX  43
H16   2    0.693841    0.478495    0.416152    11.00000   -1.20000
AFIX   0
C11   1    0.999754    0.493461    0.380045    11.00000    0.02693    0.02533 =
         0.01727    0.00383   -0.00607    0.00096
C10   1    1.012657    0.406583    0.342313    11.00000    0.02782    0.02584 =
         0.01933    0.00460   -0.00091    0.00110
C19   1    0.571634    0.231553    0.415799    11.00000    0.02520    0.02502 =
         0.02646   -0.00196   -0.00085    0.00332
AFIX  43
H19   2    0.510148    0.279802    0.390627    11.00000   -1.20000
AFIX   0
C5    1    0.338735    0.460318    0.187017    11.00000    0.03429    0.02093 =
         0.01982   -0.00002   -0.00161    0.00075
AFIX  43
H5    2    0.358448    0.521939    0.191921    11.00000   -1.20000
AFIX   0
C4    1    0.159847    0.427419    0.146924    11.00000    0.03271    0.02801 =
         0.02435    0.00012   -0.00374    0.00301
AFIX  43
H4    2    0.055777    0.466960    0.126322    11.00000   -1.20000
AFIX   0
C22   1    0.761453    0.092585    0.487721    11.00000    0.03971    0.03075 =
         0.02060    0.00462   -0.00210    0.00088
AFIX  43
H22   2    0.826349    0.044843    0.512691    11.00000   -1.20000
AFIX   0
C3    1    0.132920    0.335558    0.136856    11.00000    0.03363    0.03127 =
         0.02269   -0.00031   -0.00502   -0.00321
AFIX  43
H3    2    0.012054    0.314124    0.109177    11.00000   -1.20000
AFIX   0
C15   1    0.826722    0.590382    0.460525    11.00000    0.03460    0.03493 =
         0.02184    0.00054   -0.00434    0.01157
AFIX  43
H15   2    0.708057    0.603779    0.487378    11.00000   -1.20000
AFIX   0
C12   1    1.183823    0.550598    0.382068    11.00000    0.02794    0.03083 =
         0.02682    0.00313   -0.00456   -0.00057
AFIX  43
H12   2    1.304368    0.536908    0.356100    11.00000   -1.20000
AFIX   0
C17   1    1.056495    0.167872    0.311352    11.00000    0.02595    0.02781 =
         0.03399    0.00302    0.00655    0.00425
AFIX 137
H17A  2    0.984579    0.121493    0.283505    11.00000   -1.50000
H17B  2    1.151370    0.141186    0.347733    11.00000   -1.50000
H17C  2    1.143895    0.204583    0.282499    11.00000   -1.50000
AFIX   0
C14   1    1.011293    0.646012    0.462453    11.00000    0.04466    0.02773 =
         0.03032   -0.00358   -0.01410    0.00623
AFIX  43
H14   2    1.016768    0.696518    0.490948    11.00000   -1.20000
AFIX   0
C13   1    1.187636    0.626735    0.422136    11.00000    0.03554    0.02802 =
         0.03573    0.00208   -0.01129   -0.00442
AFIX  43
H13   2    1.308682    0.665467    0.422252    11.00000   -1.20000
AFIX   0
C20   1    0.471056    0.197464    0.472139    11.00000    0.03044    0.03624 =
         0.03307   -0.00595    0.00940    0.00304
AFIX  43
H20   2    0.338008    0.222007    0.485156    11.00000   -1.20000
AFIX   0
C21   1    0.567211    0.126598    0.509659    11.00000    0.04235    0.03711 =
         0.02467   -0.00030    0.01029   -0.00168
AFIX  43
H21   2    0.502175    0.103051    0.548287    11.00000   -1.20000
AFIX   0
HKLF 4


REM  exp_975_a.res in P2(1)/c
REM R1 =  0.0446 for    2504 Fo > 4sig(Fo)  and  0.0543 for all    2960 data
REM    245 parameters refined using      0 restraints

END  
     
WGHT      0.0591      0.2639 

REM Highest difference peak  0.219,  deepest hole -0.257,  1-sigma level  0.060
Q1    1   1.0432  0.1006  0.3129  11.00000  0.05    0.22
Q2    1   0.5790  0.4159  0.2396  11.00000  0.05    0.19
Q3    1   0.9684  0.1254  0.4562  11.00000  0.05    0.19
Q4    1   0.6370  0.1158  0.3616  11.00000  0.05    0.19
Q5    1   0.9928  0.1462  0.4796  11.00000  0.05    0.19
Q6    1   1.1397  0.0541  0.2823  11.00000  0.05    0.18
Q7    1   0.4740  0.3561  0.2203  11.00000  0.05    0.17
Q8    1   0.7675  0.5419  0.2733  11.00000  0.05    0.17
Q9    1   0.8518  0.5046  0.2406  11.00000  0.05    0.17
Q10   1   0.8270  0.0113  0.4781  11.00000  0.05    0.17
Q11   1   0.5565  0.2821  0.2182  11.00000  0.05    0.17
Q12   1   0.9243  0.3762  0.2152  11.00000  0.05    0.17
Q13   1   0.4636  0.2752  0.1164  11.00000  0.05    0.16
Q14   1   0.9147  0.1743  0.2586  11.00000  0.05    0.16
Q15   1   0.8040  0.3952  0.2605  11.00000  0.05    0.16
Q16   1   0.5738  0.5482  0.3618  11.00000  0.05    0.16
Q17   1   0.3775  0.3003  0.2001  11.00000  0.05    0.16
Q18   1   1.0498  0.0830  0.2240  11.00000  0.05    0.16
Q19   1   0.8881  0.3840  0.3208  11.00000  0.05    0.16
Q20   1   0.6867  0.6031  0.5169  11.00000  0.05    0.16

  REM The information below was added by Olex2.
  REM
  REM R1 = 0.0446 for 2504 Fo > 4sig(Fo) and 0.0543 for all 11783 data
  REM n/a parameters refined using n/a restraints
  REM Highest difference peak 0.22, deepest hole -0.26
  REM Mean Shift 0, Max Shift 0.000.

  REM +++ Tabular Listing of Refinement Information +++
  REM R1_all = 0.0543
  REM R1_gt = 0.0446
  REM wR_ref = 0.1252
  REM GOOF = 1.042
  REM Shift_max = 0.000
  REM Shift_mean = 0
  REM Reflections_all = 11783
  REM Reflections_gt = 2504
  REM Parameters = n/a
  REM Hole = -0.26
  REM Peak = 0.22
  REM Flack = n/a

  
;
_olex2_submission_special_instructions 'No special instructions were received'
_oxdiff_exptl_absorpt_empirical_details
;
Empirical correction (ABSPACK) includes:
- Absorption correction using spherical harmonics
- Frame scaling
- Detector area scaling
;
_oxdiff_exptl_absorpt_empirical_full_max 6.361
_oxdiff_exptl_absorpt_empirical_full_min 0.552
